# Supplementary material for: Long-read nanopore sequencing reveals genotype-dependent microbiome shifts and host-microbe interactions in the barley rhizosphere
Source: Research Square preprint supplement (doi:10.21203/rs.3.rs-8336676/v1), 2025-12-23
Supplement: Supplementary file 1 [file 23226aab9aad7b35f64b6d67.xlsx]

## Sheet: Table S1
Pairwise PERMANOVA results comparing rhizosphere bacterial community composition across barley status groups and controls.
Pairs	Df	SumsOfSqs	F-Model	R2	p-value	p-adj
Modern vs Wild	1	0.07143970	1442021	0.1072771	0.004	0.0240
Modern vs Landrace	1	0.07155487	1455200	0.1081515	0.037	0.0444
Wild vs Landrace	1	0.05795124	1132744	0.08625341	0.162	0.162
Modern vs Control	1	0.15170622	3228265	0.31562196	0.027	0.042
Wild vs Control	1	0.11782558	2337741	0.25035398	0.028	0.042
Landrace vs Control	1	0.1265362	2542522	0.26644131	0.022	0.042

## Sheet: Table S2
Summary statistics of whole metagenome sequencing and taxonomic classification for 2024 samples.
	Control	HID0144	HID0380	HID1029	HID1104	Gretchen
Mean read length (bp)	2082.4	3870.1	2499.4	4892.7	3335.3	3484.3
Mean Q-score	14.9	15.45	14.8	15.9	15.25	15.35
Total reads (in million)	1296028	1169271	1165139	551122	774967	761536
Total bases (Gb)	2.707	4.526	2.921	2.697	2.586	2.653
Bacteria classified reads (%)	30.22	18.79	32.58	22.28	17.09	33.12
Bacteria unclassified reads (%)	69.78	81.21	67.42	77.72	82.9	66.88
Fungi classified reads (%)	0.02	0.04	0.03	0.04	0.04	0.11
Fungi unclassified reads (%)	99.98	99.96	99.97	99.97	99.96	99.88
Proportion of bacterial reads (%)	61.7309	60.5289	70.5951	62.945	59.4295	72.5423
Proportion of fungal reads (%)	38.2691	39.4711	29.4049	37.055	40.5705	27.4577

## Sheet: Table S3
Summary statistics of whole metagenome sequencing and taxonomic classification for 2025 samples.
	Control	HID0144	HID0380	HID1029	HID1104	Gretchen
Mean read length (bp)	3557.9	2376.1	2315.6	3277.2	2484.8	3140.6
Mean Q-score	15.55	15.15	15.05	15.75	15.25	15.4
Total reads (million)	475979	749863	308700	1159099	786862	417240
Total bases (Gb)	1.693	1.783	0.715	3.799	1.955	1.311
Bacteria classified reads (%)	23.15	34.25	21.9	26.6	25.16	29.17
Bacteria unclassified reads (%)	76.85	65.75	78.1	73.4	74.84	70.83
Fungi classified reads (%)	0.05	0.07	0.04	0.04	0.04	0.06
Fungi unclassified reads (%)	99.95	99.93	99.96	99.97	99.96	99.94
Proportion of bacterial reads (%)	63.2017	67.8623	62.6551	64.7783	63.979	66.8462
Proportion of fungal reads (%)	36.7983	32.1377	37.3449	35.2217	36.021	33.1538

## Sheet: Table S4
Unique and shared bacterial genera among different cultivar categories in 2024 samples.
Control	Wild	Landrace	Modern	Control & Wild	Control & Landrace	Control & Modern	Wild & Landrace	Wild & Modern	Landrace & Modern	Control & Wild & Landrace	Control & Wild & Modern	Control & Landrace & Modern	Wild & Landrace & Modern	Control & Wild & Landrace & Modern
Deltatectivirus	Aeromonas	Advenella	Asticcacaulis	Enterococcus	Novosphingobium	Duganella	Adhaeribacter	Aminobacter	Glutamicibacter	Anaeromyxobacter	Cellulosimicrobium	Ensifer	Caballeronia	Achromobacter
Geodermatophilus	Aneurinibacillus	Anjalivirus	Brachybacterium	Hydrogenophaga	Pseudochrobactrum	Opitutus	Cellvibrio	Flavihumibacter	Hafnia	Baekduia	Conexibacter	Roseateles	Janthinobacterium	Acidovorax
Hypericibacter	Arachidicoccus	Atuphduovirus	Corynebacterium	Kineococcus	Pseudoxanthomonas		Corndogvirus	Rhodoferax	Listeria	Brucella			Luteimonas	Acinetobacter
Jiangella	Azoarcus	Bacteroides	Hyphomicrobium	Leifsonia			Emticicia	Sediminicoccus	Rickettsia	Cryobacterium			Microlunatus	Actinomadura
Lactiplantibacillus	Azospirillum	Bordetella	Leuconostoc	Moraxella			Lactobacillus	Shinella	Wolbachia	Cupriavidus			Paracoccus	Actinoplanes
Methylocystis	Candidatus Hamiltonella	Citrobacter	Micrococcus	Nocardiopsis			Nakamurella			Ferruginibacter			Polaromonas	Aeromicrobium
Mycolicibacter	Clostridium	Epilithonimonas	Nitrososphaera	Parageobacillus			Neorhizobium			Flavisolibacter			Providencia	Agrobacterium
Nitrosomonas	Croceibacterium	Harbinvirus	Tumebacillus	Protaetiibacter			Piscinibacter			Gordonia			Rahnella	Agrococcus
Pontibacter	Dietzia	Klebsiella		Staphylococcus			Rhizorhabdus			Leclercia			Saccharopolyspora	Agromyces
Prescottella	Erythrobacter	Latilactobacillus		Ureibacillus			Sanguibacter			Legionella			Sphingobium	Amycolatopsis
Telluria	Escherichia	Neisseria		Xanthomonas			Sporosarcina			Lysinibacillus			Spiroplasma	Archangium
Tepidiforma	Geobacillus	Psychrobacillus								Modestobacter			Spirosoma	Arthrobacter
Thiocapsa	Janibacter	Stieleria								Nostoc			Tessaracoccus	Bacillus
Tsuneonella	Kluyvera									Paraflavitalea				Bdellovibrio
	Lactococcus									Tsukamurella				Blastococcus
	Leucobacter									Usitatibacter				Bosea
	Mariniflexile													Bradyrhizobium
	Metabacillus													Brevundimonas
	Methyloceanibacter													Burkholderia
	Oscillatoria													Candidatus Nitrosocosmicus
	Paraclostridium													Caulobacter
	Pseudolabrys													Cellulomonas
	Roseiflexus													Chitinophaga
	Rufibacter													Chryseobacterium
	Streptococcus													Clavibacter
	Terribacillus													Comamonas
														Corallococcus
														Curtobacterium
														Dactylosporangium
														Deinococcus
														Delftia
														Devosia
														Dyadobacter
														Enterobacter
														Erwinia
														Exiguobacterium
														Flavobacterium
														Gemmata
														Gemmatimonas
														Hymenobacter
														Iamia
														Kitasatospora
														Kosakonia
														Kribbella
														Lacipirellula
														Lentzea
														Luteitalea
														Luteolibacter
														Lysobacter
														Massilia
														Mesorhizobium
														Methylobacterium
														Methylorubrum
														Microbacterium
														Micromonospora
														Microvirga
														Miltoncostaea
														Mucilaginibacter
														Mycobacterium
														Mycolicibacterium
														Myxococcus
														Neobacillus
														Nitrobacter
														Nitrosospira
														Nitrospira
														Nocardia
														Nocardioides
														Nonomuraea
														Paenarthrobacter
														Paenibacillus
														Pantoea
														Paraburkholderia
														Paraconexibacter
														Pararhizobium
														Pedobacter
														Peribacillus
														Phenylobacterium
														Phyllobacterium
														Plantibacter
														Priestia
														Pseudarthrobacter
														Pseudoduganella
														Pseudomonas
														Pseudonocardia
														Rathayibacter
														Rhizobium
														Rhodanobacter
														Rhodococcus
														Roseomonas
														Saccharothrix
														Salmonella
														Serratia
														Sinorhizobium
														Skermanella
														Sorangium
														Sphingobacterium
														Sphingomonas
														Sphingopyxis
														Stenotrophomonas
														Streptomyces
														Streptosporangium
														Tardiphaga
														Thermomonas
														Variovorax

## Sheet: Table S5
Unique and shared bacterial genera among different cultivar categories in 2025 samples.
Control	Wild	Landrace	Modern	Control & Wild	Control & Landrace	Control & Modern	Wild & Landrace	Wild & Modern	Landrace & Modern	Control & Wild & Landrace	Control & Wild & Modern	Control & Landrace & Modern	Wild & Landrace & Modern	Control & Wild & Landrace & Modern
Agatevirus	Afipia	Adhaeribacter	Aeromonas	Cellvibrio	Burkholderia	Wolbachia	Azospirillum	Leucobacter	Rufibacter	Baekduia		Duganella	Aminobacter	Achromobacter
Andromedavirus	Aureimonas	Annadreamyvirus	Bremerella	Nitrososphaera	Microlunatus		Bdellovibrio			Ferruginibacter			Brucella	Acidovorax
Bequatrovirus	Brevibacillus	Candidatus Phytoplasma	Cellulosimicrobium	Sporosarcina	Telluria		Collimonas			Flavisolibacter			Chitinophaga	Acinetobacter
Geobacillus	Chromobacterium	Clostridium	Elizabethkingia				Ensifer			Metabacillus			Cryobacterium	Actinomadura
Gilliamella	Citrobacter	Cupriavidus	Gordonvirus				Gemmata			Miltoncostaea			Enterobacter	Actinoplanes
Janibacter	Corynebacterium	Cutibacterium	Methylotenera				Geodermatophilus			Myxococcus			Enterococcus	Aeromicrobium
Rhodoferax	Erythrobacter	Dyella	Micrococcus				Hafnia			Phyllobacterium			Glutamicibacter	Agrobacterium
Sphingosinicella	Kosakonia	Flaumdravirus	Spirosoma				Hydrogenophaga			Sanguibacter			Legionella	Agrococcus
	Lactobacillus	Hypericibacter					Iamia			Sphingobium			Luteimonas	Agromyces
	Leclercia	Janthinobacterium					Jiangella			Terribacillus			Luteolibacter	Amycolatopsis
	Listeria	Jatrophihabitans					Leifsonia			Usitatibacter			Neorhizobium	Anaeromyxobacter
	Nocardiopsis	Kelleziovirus					Luteibacter						Paracoccus	Archangium
	Psychrobacillus	Lactococcus					Lysinibacillus						Paraflavitalea	Arthrobacter
	Rhizorhabdus	Methanosarcina					Niabella						Phenylobacterium	Bacillus
	Tsuneonella	Methylibium					Opitutus						Polaromonas	Blastococcus
		Methyloceanibacter					Phycicoccus						Staphylococcus	Bosea
		Microcystis					Planococcus							Bradyrhizobium
		Moraxella					Rhodococcoides							Brevundimonas
		Nakamurella					Shinella							Caballeronia
		Piscinibacter					Sinorhizobium							Candidatus Hamiltonella
		Pontibacter					Tsukamurella							Candidatus Nitrosocosmicus
		Prescottella					Xanthomonas							Caulobacter
		Pseudoxanthomonas												Cellulomonas
		Psychrobacter												Chryseobacterium
		Qipengyuania												Clavibacter
		Rhodanobacter												Comamonas
														Conexibacter
														Corallococcus
														Curtobacterium
														Dactylosporangium
														Deinococcus
														Delftia
														Devosia
														Dyadobacter
														Erwinia
														Exiguobacterium
														Flavobacterium
														Gemmatimonas
														Hymenobacter
														Kitasatospora
														Kribbella
														Lentzea
														Luteitalea
														Lysobacter
														Massilia
														Mesorhizobium
														Methylobacterium
														Methylorubrum
														Microbacterium
														Micromonospora
														Microvirga
														Modestobacter
														Mucilaginibacter
														Mycobacterium
														Mycolicibacterium
														Neobacillus
														Nitrobacter
														Nitrosospira
														Nitrospira
														Nocardia
														Nocardioides
														Nonomuraea
														Novosphingobium
														Paenarthrobacter
														Paenibacillus
														Pantoea
														Paraburkholderia
														Paraconexibacter
														Pararhizobium
														Pedobacter
														Peribacillus
														Plantibacter
														Priestia
														Providencia
														Pseudarthrobacter
														Pseudoduganella
														Pseudomonas
														Pseudonocardia
														Rathayibacter
														Rhizobium
														Rhodococcus
														Roseomonas
														Saccharothrix
														Salmonella
														Serratia
														Skermanella
														Sorangium
														Sphingobacterium
														Sphingomonas
														Sphingopyxis
														Stenotrophomonas
														Streptomyces
														Streptosporangium
														Tardiphaga
														Thermomonas
														Variovorax

## Sheet: Table S6
Summary of predicted protein annotation and functional classification metrics from whole metagenomic assemblies
Functional annotation statistics of metagenomic samples collected in 2024
Sample	Proteins	Annotated	Coverage_percent	COG_categories	KEGG_KOs	KEGG_Pathways	KEGG_Modules
Control	16615	9037	54.4	79	1929	531	321
HID0144	33323	17247	51.8	100	2899	587	412
HID0380	17930	9792	54.6	86	2083	617	332
HID1029	11202	5516	49.2	80	1597	595	315
HID1104	10840	5875	54.2	71	1686	515	300
Gretchen	7660	3919	51.2	70	1228	473	239
Functional annotation statistics of metagenomic samples collected in 2025
Sample	Proteins	Annotated	Coverage_percent	COG_categories	KEGG_KOs	KEGG_Pathways	KEGG_Modules
Control	5502	2929	53.2	63	1016	487	230
HID0144	6757	3612	53.5	67	1178	469	248
HID0380	841	419	49.8	33	182	227	73
HID1029	37912	20429	53.9	101	2847	597	401
HID1104	6063	3132	51.7	59	1009	439	230
Gretchen	2820	1460	51.8	42	558	379	181

## Sheet: Table S7
DEGs of the wild accession HID0144 compared with the control
GeneID	log2(FC)	P-adj	Chromosome	Start	End	Strand	Description
HORVU.MOREX.r3.3HG0242150	-1.00697748181528	3.85921011865042e-05	3H	82738465	82739697	-	Predicted protein
HORVU.MOREX.r3.1HG0063630	-1.03770685937263	0.0389346591268454	1H	419354306	419355688	-	chitinase (EC 3.2.1.14)
HORVU.MOREX.r3.4HG0418190	-1.05950820196604	0.003033722511646	4H	608473461	608475421	+	Peptidase C14 caspase domain-containing protein
HORVU.MOREX.r3.2HG0190660	-1.0789504116686	0.0257863406813004	2H	599989665	599997286	-	Uncharacterized protein
HORVU.MOREX.r3.2HG0156310	-1.08178028924116	1.0639477119203e-05	2H	377049710	377051438	-	Predicted protein
HORVU.MOREX.r3.1HG0017750	-1.09935047555707	0.0336349437729722	1H	56658190	56662310	+	non-specific serine/threonine protein kinase (EC 2.7.11.1)
HORVU.MOREX.r3.3HG0293070	-1.18085869436093	0.0050047660082275	3H	508263950	508266734	-	Predicted protein
HORVU.MOREX.r3.5HG0444920	-1.19167287213972	0.0415354475591385	5H	116747631	116751343	-	Uncharacterized protein
HORVU.MOREX.r3.5HG0494070	-1.19720662351851	0.0137264596093499	5H	487350269	487354085	-	Purple acid phosphatase (EC 3.1.3.2)
HORVU.MOREX.r3.2HG0111820	-1.23300882259295	0.0298148287159433	2H	38825523	38828806	+	Predicted protein
HORVU.MOREX.r3.3HG0254600	-1.24188814625391	0.0299634692399507	3H	181929035	181933484	-	Uncharacterized protein
HORVU.MOREX.r3.6HG0557070	-1.2952315900807	0.017129457318147	6H	51894056	51896274	-	Predicted protein
HORVU.MOREX.r3.1HG0066680	-1.30651041271131	0.0115858738562938	1H	435271849	435272561	+	Bowman-Birk serine protease inhibitors family domain-containing protein
HORVU.MOREX.r3.1HG0087860	-1.34512534769173	0.0003649920028056	1H	500158808	500159045	+	Uncharacterized protein
HORVU.MOREX.r3.2HG0111450	-1.3515559679335	2.92707862877715e-05	2H	36474364	36476232	-	Uncharacterized protein
HORVU.MOREX.r3.2HG0187570	-1.41080488083415	0.012525701649392	2H	587286225	587289026	-	Dof zinc finger protein
HORVU.MOREX.r3.4HG0389540	-1.43165700335479	0.0075594760070962	4H	485169983	485173010	+	RRM domain-containing protein
HORVU.MOREX.r3.7HG0727750	-1.44629055256431	0.0137106471981563	7H	567391905	567400464	+	Predicted protein
HORVU.MOREX.r3.1HG0056160	-1.46876658602363	0.0002083718555682	1H	374767110	374774624	-	Altered inheritance of mitochondria protein 32
HORVU.MOREX.r3.7HG0661600	-1.47864478879665	0.0073944046450971	7H	67276863	67278873	-	Nucleolar GTP-binding protein 1
HORVU.MOREX.r3.2HG0171680	-1.48038122668569	0.0356614377468533	2H	500329262	500333786	+	Lipoxygenase (EC 1.13.11.-)
HORVU.MOREX.r3.3HG0274650	-1.51486285659947	0.0197981792305991	3H	389684779	389686164	+	Uncharacterized protein
HORVU.MOREX.r3.7HG0718720	-1.52407170522807	0.0344805057997873	7H	520231888	520232960	+	Predicted protein
HORVU.MOREX.r3.7HG0681550	-1.53903232644726	0.0018193884408208	7H	186801100	186809084	+	Auxin response factor
HORVU.MOREX.r3.3HG0278670	-1.55738807252001	0.0009719942412756	3H	420605655	420606546	-	Predicted protein
HORVU.MOREX.r3.6HG0570630	-1.56392075918009	0.001026936785879	6H	128541823	128547526	-	Predicted protein
HORVU.MOREX.r3.7HG0732170	-1.57050210713091	2.89258658723123e-05	7H	583793202	583793880	-	EF-hand domain-containing protein
HORVU.MOREX.r3.3HG0322860	-1.58822940580116	0.0406100032583072	3H	602472730	602497853	+	THO complex subunit 2
HORVU.MOREX.r3.7HG0637960	-1.58839291775382	0.0238612755090478	7H	6570478	6591974	+	1,3-beta-glucan synthase (EC 2.4.1.34) (1,3-beta-glucan synthase)
HORVU.MOREX.r3.2HG0154530	-1.5912021454013	0.0011306752478181	2H	367707379	367708053	+	Uncharacterized protein
HORVU.MOREX.r3.5HG0470960	-1.59126792812142	0.0041462441440625	5H	372368500	372374269	-	ENT domain-containing protein
HORVU.MOREX.r3.5HG0453820	-1.59647400028855	0.0001867125985229	5H	218420742	218424073	-	Myb-like domain-containing protein
HORVU.MOREX.r3.1HG0046330	-1.60547558631611	0.0185270092042178	1H	304980668	304981519	-	Predicted protein
HORVU.MOREX.r3.1HG0095390	-1.60614744808	9.94762023175114e-06	1H	516073036	516075091	-	C2H2-type domain-containing protein
HORVU.MOREX.r3.5HG0520200	-1.61199825075416	0.0367897407949025	5H	549849837	549852818	+	Predicted protein
HORVU.MOREX.r3.3HG0267770	-1.63824166714388	0.0012316585503311	3H	331639331	331641293	+	DDE Tnp4 domain-containing protein
HORVU.MOREX.r3.1HG0038590	-1.64768561147359	0.0074281367338576	1H	239384386	239386020	+	HMA domain-containing protein
HORVU.MOREX.r3.7HG0678460	-1.6557670720512	1.58100548330612e-08	7H	165571901	165577320	-	Predicted protein
HORVU.MOREX.r3.4HG0396920	-1.66462060361175	0.020594994999445	4H	536164097	536170801	-	Uncharacterized protein
HORVU.MOREX.r3.1HG0029490	-1.67608914671758	6.33980773484712e-08	1H	137585064	137591379	-	VOC domain-containing protein
HORVU.MOREX.r3.7HG0668940	-1.68052084674449	0.007061647083712	7H	106228775	106230419	+	U-box domain-containing protein (EC 2.3.2.27) (RING-type E3 ubiquitin transferase PUB)
HORVU.MOREX.r3.7HG0644220	-1.70075678963847	0.0081941109701865	7H	17768687	17771791	-	Arginine decarboxylase (EC 4.1.1.19)
HORVU.MOREX.r3.5HG0482430	-1.70311220930789	0.0002985859427267	5H	440911780	440913073	+	Predicted protein
HORVU.MOREX.r3.1HG0069380	-1.70779450949567	1.70881435942064e-07	1H	447066482	447067230	+	Cysteine proteinase inhibitor
HORVU.MOREX.r3.4HG0334180	-1.71482704921575	0.0002615617741822	4H	7842347	7844647	+	E3 ubiquitin-protein ligase RMA (EC 2.3.2.27) (Protein RING membrane-anchor) (RING-type E3 ubiquitin transferase RMA)
HORVU.MOREX.r3.6HG0558330	-1.7178058188295	0.00047673622404	6H	57931883	57932946	+	Predicted protein
HORVU.MOREX.r3.3HG0224620	-1.71981792615671	0.0003248019622702	3H	12320007	12323038	+	Histidine-rich calcium-binding protein
HORVU.MOREX.r3.2HG0193070	-1.72351676066958	0.039925658036772	2H	606648616	606654885	-	glucose-6-phosphate 1-epimerase (EC 5.1.3.15)
HORVU.MOREX.r3.7HG0698960	-1.72604665264088	0.024734882003586	7H	373671859	373675961	-	NAC domain-containing protein
HORVU.MOREX.r3.2HG0194560	-1.72772547990728	0.0045183888744189	2H	610256003	610259354	-	Predicted protein
HORVU.MOREX.r3.3HG0237990	-1.7325272751772	0.0388599634917234	3H	55102386	55105440	+	Inositol polyphosphate-related phosphatase domain-containing protein
HORVU.MOREX.r3.1HG0083600	-1.73779910136816	0.0381260020272823	1H	492716326	492718918	+	Predicted protein
HORVU.MOREX.r3.6HG0551620	-1.74129192440221	2.81868721109262e-05	6H	30718789	30723020	+	Uncharacterized protein
HORVU.MOREX.r3.3HG0260160	-1.76170868221982	0.0004665293602123	3H	239903744	239938328	-	J domain-containing protein
HORVU.MOREX.r3.6HG0555740	-1.77620214070922	0.0010473200837853	6H	45761927	45764222	+	Predicted protein
HORVU.MOREX.r3.2HG0165060	-1.78819752471777	0.0210988829071136	2H	452655037	452656536	-	Desiccation-related protein PCC13-62
HORVU.MOREX.r3.1HG0063740	-1.78893257524117	0.0217625655187833	1H	419610090	419613275	-	Predicted protein
HORVU.MOREX.r3.3HG0284760	-1.79225246493039	0.0042356993000098	3H	461178381	461216699	-	Myosin motor domain-containing protein
HORVU.MOREX.r3.4HG0407560	-1.79737127579313	0.0498292138335743	4H	579230988	579236531	+	Predicted protein
HORVU.MOREX.r3.1HG0095290	-1.79838067635005	0.0208054427766475	1H	515899805	515909452	-	Structural maintenance of chromosomes protein 5
HORVU.MOREX.r3.7HG0658800	-1.79916589532089	0.0338849653091752	7H	57831039	57835637	-	Two-component response regulator
HORVU.MOREX.r3.5HG0471680	-1.80568955173868	0.0304539559012436	5H	379445134	379450821	+	Ferrochelatase (EC 4.98.1.1)
HORVU.MOREX.r3.3HG0240970	-1.80692234551469	3.19762777787859e-05	3H	74784119	74784988	+	Predicted protein
HORVU.MOREX.r3.7HG0690780	-1.81067409220398	0.0109412596703023	7H	266486840	266490817	+	Thiaminase-2/PQQC domain-containing protein
HORVU.MOREX.r3.3HG0318380	-1.81492686492713	0.0185471570465013	3H	592657841	592659474	+	Leucine-rich repeat-containing N-terminal plant-type domain-containing protein
HORVU.MOREX.r3.4HG0401890	-1.82221520225139	0.0474099149177372	4H	557865580	557874072	+	non-specific serine/threonine protein kinase (EC 2.7.11.1)
HORVU.MOREX.r3.5HG0524540	-1.82539293270549	1.28095011902598e-06	5H	559458494	559460132	+	Stress-induced transcription factor SNAC1
HORVU.MOREX.r3.2HG0172110	-1.82765381303613	0.0011306752478181	2H	503273089	503275571	+	Serine hydrolase domain-containing protein
HORVU.MOREX.r3.1HG0059230	-1.83153137216072	0.0100821110017547	1H	394503979	394508240	-	Calmodulin-binding domain-containing protein
HORVU.MOREX.r3.6HG0564870	-1.83606983050441	0.012005710738207	6H	92034336	92040297	-	Predicted protein
HORVU.MOREX.r3.5HG0492720	-1.83662572548095	0.0004464455409685	5H	484195576	484197118	-	Predicted protein
HORVU.MOREX.r3.3HG0330950	-1.85552602592791	0.0441048301031625	3H	620766211	620771435	-	Protein kinase domain-containing protein
HORVU.MOREX.r3.7HG0699010	-1.86130695614207	0.0184745888474473	7H	374177270	374192102	-	Circadian clock associated 1 (Predicted protein)
HORVU.MOREX.r3.4HG0392950	-1.878471030889	0.0255606400918957	4H	509034027	509037234	-	Uncharacterized protein
HORVU.MOREX.r3.6HG0627750	-1.88102098913655	0.0155377348626676	6H	547614362	547617609	+	non-specific serine/threonine protein kinase (EC 2.7.11.1)
HORVU.MOREX.r3.5HG0496050	-1.88388047721682	2.37961590115322e-05	5H	492061792	492063388	+	Predicted protein
HORVU.MOREX.r3.5HG0486440	-1.88871388164489	0.0146746156533989	5H	459851485	459856306	+	HSF-type DNA-binding domain-containing protein
HORVU.MOREX.r3.5HG0524370	-1.90008962187099	0.0011319231506591	5H	558988088	558988774	+	RRM domain-containing protein
HORVU.MOREX.r3.4HG0399660	-1.90163418902679	0.0372672388595139	4H	548856307	548858508	-	Major facilitator superfamily (MFS) profile domain-containing protein
HORVU.MOREX.r3.5HG0451020	-1.90696939883817	5.71065183098625e-05	5H	185873948	185901993	-	ubiquitinyl hydrolase 1 (EC 3.4.19.12)
HORVU.MOREX.r3.3HG0285550	-1.91128488028809	0.0006711271890812	3H	466259539	466260805	-	Predicted protein
HORVU.MOREX.r3.1HG0071210	-1.91597960971266	1.21545492069551e-06	1H	454554556	454556998	-	RING-type E3 ubiquitin transferase (EC 2.3.2.27)
HORVU.MOREX.r3.2HG0139340	-1.92304997273057	8.73111731188418e-07	2H	202111101	202113274	+	Protein translation factor SUI1 homolog (Protein GOS2) (Protein eIF1) (Translation initiation factor 1)
HORVU.MOREX.r3.3HG0303030	-1.92505161994802	0.0208656136049243	3H	551524241	551527455	-	Coatomer subunit zeta
HORVU.MOREX.r3.5HG0483770	-1.94058275183605	0.0403974653897525	5H	444151759	444151960	-	Uncharacterized protein
HORVU.MOREX.r3.5HG0480600	-1.94277814727016	0.0338849653091752	5H	432316764	432318427	+	Protein TIFY (Jasmonate ZIM domain-containing protein)
HORVU.MOREX.r3.1HG0064920	-1.95033168498131	6.7594000522514e-05	1H	426347873	426349324	-	Alpha/beta hydrolase fold-3 domain-containing protein
HORVU.MOREX.r3.4HG0409670	-1.95132560037619	5.58850977908031e-05	4H	586885992	586892637	+	Predicted protein
HORVU.MOREX.r3.7HG0655650	-1.95409967016005	0.0163502984374511	7H	47197208	47197520	-	Bifunctional inhibitor/plant lipid transfer protein/seed storage helical domain-containing protein
HORVU.MOREX.r3.4HG0351790	-1.95568994033817	0.0105806768697663	4H	110860329	110862956	-	Predicted protein
HORVU.MOREX.r3.4HG0386490	-1.9667632430162	0.0243303889145858	4H	463156448	463159395	-	Protein kinase domain-containing protein
HORVU.MOREX.r3.5HG0470700	-1.97586082504935	0.0315646598436718	5H	369893283	369894226	-	Predicted protein
HORVU.MOREX.r3.7HG0695840	-1.98113169713235	0.0307851914127553	7H	335299727	335300069	-	Uncharacterized protein
HORVU.MOREX.r3.7HG0750140	-1.99657938812135	0.0060385935125149	7H	624599498	624604043	+	Predicted protein
HORVU.MOREX.r3.4HG0389360	-10.0572137208661	3.31973221915427e-21	4H	483718804	483719628	+	Predicted protein
HORVU.MOREX.r3.3HG0237670	-10.16234510503	2.51748785307313e-13	3H	53528641	53529130	+	SHSP domain-containing protein
HORVU.MOREX.r3.4HG0389370	-10.2304108647235	1.5084139903550099e-13	4H	483815225	483816136	+	SHSP domain-containing protein
HORVU.MOREX.r3.3HG0237680	-10.4722057252184	2.3413411975040103e-14	3H	53532591	53533387	+	SHSP domain-containing protein
HORVU.MOREX.r3.3HG0237710	-10.7850877856303	2.02743072835096e-15	3H	53711174	53711919	+	Predicted protein
HORVU.MOREX.r3.4HG0389430	-10.8317362787287	2.06967610970001e-26	4H	484054212	484055133	-	SHSP domain-containing protein
HORVU.MOREX.r3.2HG0107690	-2.01248003475665	0.0279433967442734	2H	25807922	25810979	-	non-specific serine/threonine protein kinase (EC 2.7.11.1)
HORVU.MOREX.r3.7HG0656030	-2.02773713836323	0.0047654653550449	7H	48711095	48713949	+	Protein kinase domain-containing protein
HORVU.MOREX.r3.3HG0224520	-2.06011007709453	0.0127177994200499	3H	12267231	12268960	+	Uncharacterized protein
HORVU.MOREX.r3.4HG0344820	-2.06234415915349	0.0034250335901864	4H	56125100	56131981	-	Protein kinase domain-containing protein
HORVU.MOREX.r3.4HG0407900	-2.06598777014843	0.003248294890834	4H	580737318	580747953	+	Citrate transporter-like domain-containing protein
HORVU.MOREX.r3.1HG0076400	-2.07451442332656	4.27415887673834e-06	1H	475000192	475004407	+	Papain-like cysteine proteinase
HORVU.MOREX.r3.4HG0387510	-2.07701424817385	0.0001115398407806	4H	469715748	469719385	-	UDP-glucose 4,6-dehydratase (EC 4.2.1.76)
HORVU.MOREX.r3.5HG0499780	-2.07917773952899	0.0020606136049981	5H	502849433	502854616	+	Protein DETOXIFICATION (Multidrug and toxic compound extrusion protein)
HORVU.MOREX.r3.2HG0199680	-2.09569712560213	0.0112218221018544	2H	622687390	622690337	+	BHLH domain-containing protein
HORVU.MOREX.r3.3HG0240050	-2.10174806583597	0.0212805071660597	3H	68939425	68948194	-	Uncharacterized protein
HORVU.MOREX.r3.7HG0716630	-2.11056967981565	2.0085792361557e-06	7H	504262833	504264048	+	Domain X domain-containing protein
HORVU.MOREX.r3.6HG0547570	-2.11523013110107	0.0003496977892875	6H	19587085	19588873	-	Protein LURP-one-related 15
HORVU.MOREX.r3.7HG0732330	-2.11639066303203	0.0001656859292576	7H	584073581	584076272	+	Predicted protein
HORVU.MOREX.r3.7HG0732120	-2.12291046311274	0.0063715535193868	7H	583566568	583568392	-	Glycosyltransferase (EC 2.4.1.-)
HORVU.MOREX.r3.2HG0106640	-2.12746883660711	0.0052097209519785	2H	23770470	23774123	-	Dihydrolipoamide acetyltransferase component of pyruvate dehydrogenase complex (EC 2.3.1.-)
HORVU.MOREX.r3.1HG0089130	-2.13009998214515	0.0109784545022136	1H	502514593	502517638	+	Predicted protein
HORVU.MOREX.r3.2HG0195630	-2.14140586228061	1.5284710348985e-06	2H	613347706	613352250	+	Germin-like protein
HORVU.MOREX.r3.7HG0723280	-2.14511391089997	0.0389210719039131	7H	546907350	546911384	-	PLATZ transcription factor family protein
HORVU.MOREX.r3.1HG0076550	-2.15124509163646	0.019386902173551	1H	475239988	475240979	-	Predicted protein
HORVU.MOREX.r3.7HG0746670	-2.1523033121643	0.0448966394304929	7H	618033460	618039072	+	DUF668 domain-containing protein
HORVU.MOREX.r3.3HG0282140	-2.16239830981827	3.9900868996784403e-10	3H	446981885	446984060	-	Uncharacterized protein
HORVU.MOREX.r3.5HG0509400	-2.17125595417693	4.5585232740752e-05	5H	523829898	523840425	-	Uncharacterized protein
HORVU.MOREX.r3.2HG0187680	-2.17204444011456	2.57197220330537e-05	2H	587989178	587990301	+	glutathione transferase (EC 2.5.1.18)
HORVU.MOREX.r3.1HG0072890	-2.2032188187085	0.0340833280025335	1H	460230584	460234494	+	Transcription factor CBF/NF-Y/archaeal histone domain-containing protein
HORVU.MOREX.r3.3HG0289920	-2.20861682922812	2.08148415053558e-05	3H	493367042	493370108	-	Calcyclin-binding protein
HORVU.MOREX.r3.5HG0483980	-2.208949054806	0.0010043012975033	5H	445062888	445067554	+	cinnamoyl-CoA reductase (EC 1.2.1.44)
HORVU.MOREX.r3.4HG0400780	-2.2234067926029	0.0352809611315643	4H	553180910	553182969	-	Predicted protein
HORVU.MOREX.r3.3HG0294660	-2.22413418564211	2.83731998656703e-07	3H	514950853	514951748	-	Predicted protein
HORVU.MOREX.r3.3HG0280900	-2.22955016193103	5.38190661034036e-06	3H	438097609	438101702	+	ATP synthase subunit beta (EC 7.1.2.2)
HORVU.MOREX.r3.5HG0497220	-2.238501821792	0.0006866716682203	5H	494396701	494398765	+	Uncharacterized protein
HORVU.MOREX.r3.5HG0516720	-2.24885743046116	1.09078590239427e-09	5H	541721474	541722654	-	Glutathione S-transferase (EC 2.5.1.18)
HORVU.MOREX.r3.1HG0061230	-2.25236196532378	3.81296601272601e-07	1H	406511176	406558069	-	Serine/threonine-protein kinase TOR (EC 2.7.11.1)
HORVU.MOREX.r3.2HG0122660	-2.25312540692454	0.0318429581360632	2H	83440284	83445481	+	Uncharacterized protein
HORVU.MOREX.r3.3HG0283720	-2.25997970918281	0.0012828801600585	3H	455642897	455649470	+	IST1-like protein
HORVU.MOREX.r3.5HG0490240	-2.26550943790893	0.0367897407949025	5H	475674329	475678150	-	BPI/LBP family protein
HORVU.MOREX.r3.4HG0393690	-2.2705811961595	0.0030707708099165	4H	514443418	514445661	-	Glutamate decarboxylase (EC 4.1.1.15)
HORVU.MOREX.r3.5HG0442330	-2.30796114892228	2.41398311034969e-06	5H	95710113	95711490	+	Uncharacterized protein
HORVU.MOREX.r3.4HG0394520	-2.32042975328944	0.027056118052845	4H	519985147	519987776	+	Poly [ADP-ribose] polymerase
HORVU.MOREX.r3.3HG0230950	-2.32296703069238	0.0024564725738951	3H	24903608	24906457	+	SLT1 protein
HORVU.MOREX.r3.3HG0299650	-2.32346304586829	0.0109052011425853	3H	538125500	538128438	+	Predicted protein
HORVU.MOREX.r3.5HG0527840	-2.32717008954225	0.0009982849592891	5H	566770708	566772265	-	GRAM domain-containing protein
HORVU.MOREX.r3.4HG0384980	-2.3326512525609	0.0005360231923929	4H	451876787	451880006	+	Uncharacterized protein
HORVU.MOREX.r3.1HG0040050	-2.33648430682128	0.0245956118129824	1H	253479456	253498390	+	ATP-dependent helicase ATRX
HORVU.MOREX.r3.5HG0512230	-2.3431865187732	3.62264789931083e-07	5H	530656414	530659351	-	Protein ENHANCED DISEASE RESISTANCE 2 C-terminal domain-containing protein
HORVU.MOREX.r3.1HG0026630	-2.35978453847608	0.0120542344317458	1H	114689163	114689514	+	Small ribosomal subunit protein uS13m (Ribosomal protein S13, mitochondrial)
HORVU.MOREX.r3.3HG0292500	-2.36512247893694	6.15022957432266e-05	3H	505687266	505695733	+	non-specific serine/threonine protein kinase (EC 2.7.11.1)
HORVU.MOREX.r3.2HG0107080	-2.40301874781381	2.26827209461036e-20	2H	24586998	24597267	+	Tr-type G domain-containing protein
HORVU.MOREX.r3.7HG0677770	-2.42856418675004	0.00777871501072	7H	159606995	159611350	+	galactinol--sucrose galactosyltransferase (EC 2.4.1.82)
HORVU.MOREX.r3.7HG0705990	-2.42898860806992	0.0011925807293572	7H	434393877	434396594	+	Glycosyltransferase
HORVU.MOREX.r3.7HG0654450	-2.43100051881413	0.0011925807293572	7H	43640610	43649320	-	ABC transporter C family member 13 (Multidrug resistance-associated protein 13) (OsMRP5) (Protein LOW PHYTIC ACID 2)
HORVU.MOREX.r3.4HG0332180	-2.45068231271659	0.0027154586940052	4H	2600722	2602808	-	SUZ domain-containing protein
HORVU.MOREX.r3.1HG0026640	-2.46195064651696	0.0011925807293572	1H	114690083	114690602	+	Uncharacterized protein
HORVU.MOREX.r3.6HG0543610	-2.46583923800013	0.0078294098178196	6H	13336622	13337861	+	Alpha/beta hydrolase fold-3 domain-containing protein
HORVU.MOREX.r3.4HG0387910	-2.47370987224579	0.0003893463639619	4H	472453257	472453808	+	ATPase F1/V1/A1 complex alpha/beta subunit N-terminal domain-containing protein
HORVU.MOREX.r3.1HG0053590	-2.49125917896747	0.0112752001108626	1H	358248158	358253865	-	Lysine-specific demethylase JMJ706
HORVU.MOREX.r3.6HG0584610	-2.4952094928561	0.0022560963617744	6H	259151873	259153593	-	SUZ domain-containing protein
HORVU.MOREX.r3.7HG0642120	-2.4952094928561	0.0022560963617744	7H	14413660	14415296	+	Uncharacterized protein
HORVU.MOREX.r3.3HG0242800	-2.49576259313251	0.021922290453885	3H	85889071	85894630	+	Importin subunit alpha
HORVU.MOREX.r3.2HG0096420	-2.50496894945318	0.0428210203235389	2H	2295703	2297548	-	Uncharacterized protein
HORVU.MOREX.r3.2HG0179120	-2.5142332602864	0.0038912018743084	2H	547468385	547469260	-	Small ribosomal subunit protein uS13m (Ribosomal protein S13, mitochondrial)
HORVU.MOREX.r3.5HG0426410	-2.51875034742114	0.0401800494742585	5H	15783094	15785806	-	9-cis-epoxycarotenoid dioxygenase (EC 1.13.11.51)
HORVU.MOREX.r3.5HG0526830	-2.5235622702635	2.72133268044366e-07	5H	564447510	564452064	+	TOG domain-containing protein
HORVU.MOREX.r3.5HG0523860	-2.52914390282597	0.0147960561294357	5H	557719254	557723478	-	non-specific serine/threonine protein kinase (EC 2.7.11.1)
HORVU.MOREX.r3.1HG0083130	-2.53541791498398	1.82970264431375e-06	1H	491753278	491754339	+	AP2/ERF domain-containing protein
HORVU.MOREX.r3.1HG0073350	-2.53751663314748	1.55842001548911e-18	1H	462060396	462063653	+	Predicted protein
HORVU.MOREX.r3.5HG0509430	-2.54062348483457	3.9909813713962596e-11	5H	523880523	523883020	+	Predicted protein
HORVU.MOREX.r3.1HG0063930	-2.54115634342656	0.0018879168026033	1H	420845188	420849098	+	Protein WEAK CHLOROPLAST MOVEMENT UNDER BLUE LIGHT 1
HORVU.MOREX.r3.1HG0083140	-2.54885089801323	1.77409396647233e-06	1H	491764124	491765149	-	Predicted protein
HORVU.MOREX.r3.3HG0306750	-2.59295085217682	0.0140998395932182	3H	562713929	562718618	-	Protein root UVB sensitive 6
HORVU.MOREX.r3.6HG0632370	-2.59672488339201	0.0042836122243523	6H	558072644	558077223	+	Predicted protein
HORVU.MOREX.r3.6HG0599800	-2.60458873457493	0.0121049037736511	6H	404088475	404089172	+	Uncharacterized protein
HORVU.MOREX.r3.4HG0347210	-2.60765264794509	0.0352595061742549	4H	74307684	74308538	-	RING-type E3 ubiquitin transferase (EC 2.3.2.27)
HORVU.MOREX.r3.7HG0645780	-2.6190250724493	1.22527365259079e-07	7H	21361871	21362445	+	Uncharacterized protein
HORVU.MOREX.r3.1HG0066210	-2.62038744859926	0.0342505970041996	1H	432710424	432714216	-	NB-ARC domain-containing protein
HORVU.MOREX.r3.2HG0112920	-2.62470409679128	0.0355413274778375	2H	42195981	42203574	-	Acyl-CoA dehydrogenase family member 11
HORVU.MOREX.r3.1HG0073090	-2.62491696474491	7.7385841949177e-07	1H	460785164	460793016	+	phosphatidate phosphatase (EC 3.1.3.4)
HORVU.MOREX.r3.2HG0152090	-2.63519783732943	1.92475091702658e-05	2H	344773714	344829307	-	GRIP domain-containing protein
HORVU.MOREX.r3.1HG0058280	-2.67898013707731	0.0106198028836069	1H	388067264	388074497	+	D-3-phosphoglycerate dehydrogenase (EC 1.1.1.95)
HORVU.MOREX.r3.1HG0026530	-2.67952484360202	0.0015037834677671	1H	114626926	114627277	-	Small ribosomal subunit protein uS13m (Ribosomal protein S13, mitochondrial)
HORVU.MOREX.r3.4HG0405130	-2.6805367732374	0.0100661981846887	4H	569256317	569257677	-	AB hydrolase-1 domain-containing protein
HORVU.MOREX.r3.6HG0565830	-2.68300278807106	5.37873412104572e-10	6H	96446308	96448586	-	Ubiquitin-like domain-containing protein
HORVU.MOREX.r3.7HG0712790	-2.69155645120539	0.001026936785879	7H	482809097	482809967	+	SUZ domain-containing protein
HORVU.MOREX.r3.2HG0179110	-2.69723603421334	0.0001114879530757	2H	547467297	547467816	-	Uncharacterized protein
HORVU.MOREX.r3.7HG0705340	-2.69808465447325	0.0001015926418984	7H	431301799	431303921	-	Predicted protein
HORVU.MOREX.r3.3HG0302590	-2.70371139812859	0.0036343782045802	3H	549628047	549631228	-	Uncharacterized protein
HORVU.MOREX.r3.5HG0520880	-2.70914092140504	1.05115751082434e-05	5H	550954348	550955218	+	Predicted protein
HORVU.MOREX.r3.4HG0337140	-2.71483379687809	0.0299634692399507	4H	17421747	17432245	-	non-specific serine/threonine protein kinase (EC 2.7.11.1)
HORVU.MOREX.r3.2HG0105180	-2.71744566607467	0.0286103817057807	2H	19838781	19846874	+	DUF7648 domain-containing protein
HORVU.MOREX.r3.5HG0522090	-2.72013870542816	0.0136079174671726	5H	553324809	553329850	+	Exocyst component Exo84 C-terminal domain-containing protein
HORVU.MOREX.r3.7HG0686010	-2.73497726740499	1.01900302645895e-06	7H	219246512	219254342	+	RBR-type E3 ubiquitin transferase (EC 2.3.2.31)
HORVU.MOREX.r3.4HG0399360	-2.73878474668457	8.96575181577703e-05	4H	547621677	547622196	+	Uncharacterized protein
HORVU.MOREX.r3.5HG0444610	-2.74053957758124	0.0009191225916189	5H	114562513	114564029	+	Universal stress protein 9303
HORVU.MOREX.r3.4HG0358770	-2.74584330688928	4.32673511418505e-05	4H	164230767	164232141	+	Uncharacterized protein
HORVU.MOREX.r3.3HG0294380	-2.75510575169692	0.0087197812201198	3H	514163246	514164137	+	NTF2 domain-containing protein
HORVU.MOREX.r3.4HG0383230	-2.78674932225508	6.13088372401089e-05	4H	436852553	436857062	-	PHD and RING finger domain-containing protein 1
HORVU.MOREX.r3.7HG0662560	-2.78959929172665	2.08148415053558e-05	7H	70143208	70151910	+	Chalcone--flavanone isomerase
HORVU.MOREX.r3.4HG0412120	-2.79069159747637	1.81223206110586e-05	4H	593434744	593437167	-	Predicted protein
HORVU.MOREX.r3.1HG0064880	-2.7929662832323	0.0022517867059697	1H	426018051	426019131	+	Alpha/beta hydrolase fold-3 domain-containing protein
HORVU.MOREX.r3.2HG0103920	-2.79361734918852	0.0021114141961251	2H	17143731	17145681	-	L-ascorbate peroxidase (EC 1.11.1.11)
HORVU.MOREX.r3.2HG0111440	-2.79435991100734	7.304718910824119e-12	2H	36448972	36449996	-	Predicted protein
HORVU.MOREX.r3.1HG0032990	-2.79982813302168	4.821082345482759e-16	1H	170934763	170943446	-	Uncharacterized protein
HORVU.MOREX.r3.2HG0211850	-2.8158354074905	0.026076661803928	2H	651245798	651246886	+	Predicted protein
HORVU.MOREX.r3.2HG0102600	-2.83440946369718	3.9736142201354406e-09	2H	15250620	15254952	+	peptidylprolyl isomerase (EC 5.2.1.8)
HORVU.MOREX.r3.2HG0151810	-2.83570095355502	0.0229186682865597	2H	341152681	341158410	+	Small RNA 2'-O-methyltransferase (EC 2.1.1.386)
HORVU.MOREX.r3.1HG0071920	-2.83888340008979	0.0080021611708714	1H	456791470	456796423	+	Protein kinase domain-containing protein
HORVU.MOREX.r3.3HG0305220	-2.83888340008979	0.0080021611708714	3H	558116413	558120526	-	4-coumarate--CoA ligase (EC 6.2.1.12)
HORVU.MOREX.r3.3HG0328610	-2.84692270940189	3.5141879379950604e-09	3H	615122273	615122991	+	Uncharacterized protein
HORVU.MOREX.r3.7HG0659160	-2.84781071320429	0.0235052365603172	7H	59731528	59733813	+	cinnamoyl-CoA reductase (EC 1.2.1.44)
HORVU.MOREX.r3.1HG0054510	-2.85387437591634	0.0062241819334502	1H	364645318	364648117	+	Predicted protein
HORVU.MOREX.r3.7HG0710460	-2.86928232767406	0.0001303234200412	7H	464077986	464114687	+	HEAT repeat-containing protein 5B
HORVU.MOREX.r3.1HG0039450	-2.87010270420827	8.15001402659636e-10	1H	249571760	249572479	-	Uncharacterized protein
HORVU.MOREX.r3.4HG0399350	-2.88148266229764	0.0001909762751667	4H	547620757	547621108	+	Small ribosomal subunit protein uS13m (Ribosomal protein S13, mitochondrial)
HORVU.MOREX.r3.3HG0223070	-2.89262724384878	5.37873412104572e-10	3H	9390829	9391547	+	Uncharacterized protein
HORVU.MOREX.r3.3HG0328510	-2.89262724384878	5.37873412104572e-10	3H	615065975	615066692	+	Uncharacterized protein
HORVU.MOREX.r3.7HG0691850	-2.91398581377233	1.16070068917923e-16	7H	282012340	282021674	+	Activator of Hsp90 ATPase AHSA1-like N-terminal domain-containing protein
HORVU.MOREX.r3.5HG0517090	-2.92674011762178	7.22291358723154e-34	5H	542793841	542796541	+	Predicted protein
HORVU.MOREX.r3.2HG0208340	-2.92789213844012	0.0001041128468144	2H	643278887	643281992	-	BHLH domain-containing protein
HORVU.MOREX.r3.3HG0283700	-2.93306919966781	0.0077229001675316	3H	455502426	455504209	+	Transcription factor (bHLH transcription factor) (Basic helix-loop-helix protein)
HORVU.MOREX.r3.1HG0026520	-2.94729302457918	0.0198063369507788	1H	114625838	114626180	-	Uncharacterized protein
HORVU.MOREX.r3.5HG0435760	-2.95967483779325	0.0244813417089972	5H	53184354	53184651	-	Uncharacterized protein
HORVU.MOREX.r3.1HG0028320	-2.97227262239454	4.2584544116307006e-10	1H	131938115	131943230	+	Heat shock 70 kDa protein 14
HORVU.MOREX.r3.3HG0235810	-3.00390714659353	0.00110817698182	3H	39918643	39922803	+	pyruvate decarboxylase (EC 4.1.1.1)
HORVU.MOREX.r3.4HG0396310	-3.00414862114614	2.6516180039380404e-09	4H	531746492	531751790	-	Predicted protein
HORVU.MOREX.r3.1HG0015720	-3.01028508384493	0.0011214257444052	1H	44498358	44500887	+	Predicted protein
HORVU.MOREX.r3.2HG0187000	-3.04334501831644	0.0036159301854832	2H	584589742	584590597	-	HvCBF11 (Predicted protein)
HORVU.MOREX.r3.6HG0609850	-3.05052373231095	0.0002304908874497	6H	477896056	477900131	-	RING-type E3 ubiquitin transferase
HORVU.MOREX.r3.7HG0700970	-3.05574714218799	0.0015007416214352	7H	392782987	392783392	+	ATPase F1/V1/A1 complex alpha/beta subunit N-terminal domain-containing protein
HORVU.MOREX.r3.7HG0728810	-3.08544524007729	0.0008347790777406	7H	572462620	572463908	-	Xyloglucan endotransglucosylase/hydrolase (EC 2.4.1.207)
HORVU.MOREX.r3.4HG0392110	-3.09630423958535	0.0177328413690843	4H	503478753	503479827	+	Uncharacterized protein
HORVU.MOREX.r3.3HG0293880	-3.10468552294841	0.014319431405656	3H	511438345	511441097	-	Protein artemis (DNA cross-link repair 1C protein)
HORVU.MOREX.r3.4HG0399620	-3.10471793672272	5.7678971664762e-10	4H	548782241	548784362	-	Major facilitator superfamily (MFS) profile domain-containing protein
HORVU.MOREX.r3.5HG0478330	-3.12639244269917	1.71923555715102e-07	5H	417795224	417796043	-	AN1-type domain-containing protein
HORVU.MOREX.r3.3HG0292000	-3.12968835516259	0.0037374277214438	3H	502947258	502947459	+	Uncharacterized protein
HORVU.MOREX.r3.7HG0748860	-3.13554907334655	0.0036561649163909	7H	622184097	622197058	+	DNA helicase (EC 3.6.4.12)
HORVU.MOREX.r3.5HG0479050	-3.15631547045102	0.0027188711613771	5H	423749149	423749724	+	Uncharacterized protein
HORVU.MOREX.r3.3HG0285840	-3.17442734691275	0.0006006575057277	3H	467573843	467575681	+	Predicted protein
HORVU.MOREX.r3.1HG0059290	-3.18663240827123	2.78531671025239e-14	1H	394923703	394924572	+	EF-hand domain-containing protein
HORVU.MOREX.r3.1HG0083950	-3.1868711411288	1.21312641245744e-06	1H	493532270	493535406	-	Heat shock factor A2c (Predicted protein)
HORVU.MOREX.r3.4HG0401380	-3.1938938203183	0.0167482875377619	4H	555682674	555683608	-	SHSP domain-containing protein
HORVU.MOREX.r3.2HG0177670	-3.21048413240533	0.0155019195804157	2H	539246122	539271730	-	non-specific serine/threonine protein kinase (EC 2.7.11.1)
HORVU.MOREX.r3.7HG0657910	-3.21703753425326	0.0185820782614514	7H	54250182	54253565	-	Nodulin-like domain-containing protein
HORVU.MOREX.r3.5HG0436160	-3.23615765119911	0.0115867565572488	5H	53461650	53461947	-	Uncharacterized protein
HORVU.MOREX.r3.6HG0616950	-3.24043669147781	0.0029084668996549	6H	514709244	514709998	-	SHSP domain-containing protein
HORVU.MOREX.r3.1HG0028570	-3.24416468973045	0.0115867565572488	1H	132252521	132252818	-	Uncharacterized protein
HORVU.MOREX.r3.5HG0487910	-3.24416468973045	0.0115867565572488	5H	467785788	467789279	+	Probable purine permease
HORVU.MOREX.r3.3HG0295610	-3.24597159650091	1.23998199497228e-06	3H	520525064	520528038	-	Predicted protein
HORVU.MOREX.r3.7HG0716600	-3.25927465089939	3.4128307893867e-30	7H	504258243	504258795	+	Ribosomal protein S1
HORVU.MOREX.r3.7HG0659270	-3.26110769304081	0.0108966574910017	7H	60028596	60045716	+	ABC-type xenobiotic transporter (EC 7.6.2.2)
HORVU.MOREX.r3.7HG0659120	-3.26670088512643	0.0122677102054179	7H	59412780	59415058	-	cinnamoyl-CoA reductase (EC 1.2.1.44)
HORVU.MOREX.r3.2HG0214680	-3.26694750356149	2.33986203165397e-05	2H	657152996	657154213	-	glutathione transferase (EC 2.5.1.18)
HORVU.MOREX.r3.2HG0099220	-3.27435010234317	8.7579709737248e-37	2H	9475104	9476634	+	ATP synthase subunit alpha
HORVU.MOREX.r3.5HG0435440	-3.29243686399835	6.64813492780402e-06	5H	53040602	53040899	-	Uncharacterized protein
HORVU.MOREX.r3.5HG0444040	-3.29501836611523	1.4954597292451602e-09	5H	110447679	110448165	-	Bet v I/Major latex protein domain-containing protein
HORVU.MOREX.r3.4HG0418530	-3.31048152718756	0.0205217580216013	4H	609367842	609374010	-	Clp R domain-containing protein
HORVU.MOREX.r3.5HG0462920	-3.34446267503591	0.0001017862691009	5H	312082663	312083014	-	Small ribosomal subunit protein uS13m (Ribosomal protein S13, mitochondrial)
HORVU.MOREX.r3.2HG0208660	-3.34453741576986	2.2748369667948403e-14	2H	643921244	643922386	+	Predicted protein
HORVU.MOREX.r3.1HG0072060	-3.37261543453629	0.0002999677836516	1H	457133180	457134028	+	Predicted protein
HORVU.MOREX.r3.5HG0484480	-3.3779832325558	2.48020653036753e-09	5H	449162105	449167428	+	Predicted protein
HORVU.MOREX.r3.1HG0043530	-3.37899957975654	0.0022283949135034	1H	282245888	282249974	-	Cytokinin riboside 5'-monophosphate phosphoribohydrolase (EC 3.2.2.n1)
HORVU.MOREX.r3.2HG0181540	-3.37899957975654	0.0022283949135034	2H	558214710	558218417	-	AAA+ ATPase domain-containing protein
HORVU.MOREX.r3.2HG0175070	-3.37969444492637	0.0108258168137942	2H	524283472	524285898	-	Uncharacterized protein
HORVU.MOREX.r3.1HG0026650	-3.39611807347553	0.0095791320550106	1H	114691921	114692372	+	Uncharacterized protein
HORVU.MOREX.r3.3HG0299440	-3.40270777941548	0.0016509404639006	3H	537098182	537101239	+	AP2/ERF domain-containing protein
HORVU.MOREX.r3.4HG0408330	-3.45020465981654	0.0425437860116796	4H	581881497	581883510	-	WAT1-related protein
HORVU.MOREX.r3.6HG0562790	-3.45020465981654	0.0425437860116796	6H	82284145	82284442	-	Uncharacterized protein
HORVU.MOREX.r3.5HG0488870	-3.46054266024012	0.0453278788572254	5H	472555074	472559937	+	DUF6598 domain-containing protein
HORVU.MOREX.r3.6HG0556280	-3.46054266024012	0.0453278788572254	6H	48357741	48362621	-	NB-ARC domain-containing protein
HORVU.MOREX.r3.7HG0648840	-3.48176634536356	1.08886429434287e-06	7H	27341488	27346706	-	STAS domain-containing protein
HORVU.MOREX.r3.1HG0076420	-3.48408907603614	0.0001800817007976	1H	475005286	475008083	+	Predicted protein
HORVU.MOREX.r3.7HG0737210	-3.4934770460624	7.13130663893147e-06	7H	597195492	597196233	+	NAD(P)H dehydrogenase subunit H
HORVU.MOREX.r3.3HG0293290	-3.50412410722646	0.0015007416214352	3H	508879838	508880650	+	Cysteine-rich transmembrane domain-containing protein
HORVU.MOREX.r3.6HG0572030	-3.51679557722136	0.0014843389546896	6H	138175037	138179703	-	Uncharacterized protein
HORVU.MOREX.r3.2HG0135120	-3.52514646977024	1.96265551962355e-12	2H	167766508	167768419	-	Uncharacterized protein
HORVU.MOREX.r3.3HG0222960	-3.53372077354658	0.0009654655901216	3H	9342346	9343546	-	NADH-ubiquinone oxidoreductase chain 5
HORVU.MOREX.r3.6HG0577480	-3.53652810114286	3.52382325372347e-47	6H	180310665	180311145	-	Ribosomal protein S1
HORVU.MOREX.r3.1HG0025510	-3.5665563760818	0.0129762133333667	1H	103500766	103501925	+	Predicted protein
HORVU.MOREX.r3.2HG0179100	-3.58024435856454	1.02137606623842e-07	2H	547465527	547465978	-	Uncharacterized protein
HORVU.MOREX.r3.6HG0598470	-3.58038020733544	0.008982737754817	6H	393658604	393660580	-	Cytochrome b5 heme-binding domain-containing protein
HORVU.MOREX.r3.4HG0392880	-3.58143683344321	5.786377538551181e-15	4H	508736973	508742650	+	Senescence domain-containing protein
HORVU.MOREX.r3.1HG0026590	-3.60304305778258	0.0060237028150909	1H	114662593	114663400	+	DNA-directed RNA polymerase
HORVU.MOREX.r3.2HG0122170	-3.61521885602138	6.22779012134316e-09	2H	81141684	81143275	+	Uncharacterized protein
HORVU.MOREX.r3.4HG0346230	-3.61540420717294	0.005322168092583	4H	66875293	66876227	+	Predicted protein
HORVU.MOREX.r3.2HG0179270	-3.61844970535747	1.0554628515374e-50	2H	547532509	547533034	-	Ribosomal protein S1 (Ribosomal protein small subunit 1)
HORVU.MOREX.r3.7HG0688610	-3.62876830308744	0.0017002155670042	7H	246210739	246211267	+	NADH-ubiquinone oxidoreductase chain 4 (EC 7.1.1.2) (NADH dehydrogenase subunit 4)
HORVU.MOREX.r3.4HG0389000	-3.64605660992441	1.63109660466114e-05	4H	481543652	481545690	+	protein-serine/threonine phosphatase (EC 3.1.3.16)
HORVU.MOREX.r3.1HG0093870	-3.6558741858989	6.242972600551e-08	1H	512621949	512623159	+	Pathogen-related protein
HORVU.MOREX.r3.6HG0562080	-3.66799745163632	2.11193063163214e-14	6H	81975993	81977953	-	Uncharacterized protein
HORVU.MOREX.r3.4HG0353800	-3.68610952469149	0.0006457942791622	4H	125136095	125137295	+	NADH-ubiquinone oxidoreductase chain 5
HORVU.MOREX.r3.5HG0435650	-3.6864715296139	0.0008056405925387	5H	53137801	53138098	-	Uncharacterized protein
HORVU.MOREX.r3.3HG0325150	-3.69065609217417	2.0676092765028498e-42	3H	607387805	607389171	+	Uncharacterized protein
HORVU.MOREX.r3.7HG0708730	-3.72886540604868	0.0071217929528012	7H	452415845	452421519	+	Predicted protein
HORVU.MOREX.r3.4HG0338640	-3.7591975452722	1.85548904609428e-05	4H	23104625	23106148	-	Uncharacterized protein
HORVU.MOREX.r3.7HG0706880	-3.83738823740971	0.0036647761803877	7H	441106893	441109300	+	Predicted protein
HORVU.MOREX.r3.5HG0460500	-3.83901765436242	0.0044156856600842	5H	292327507	292327972	+	NAD(P)H dehydrogenase subunit H
HORVU.MOREX.r3.5HG0423650	-3.84715074811143	0.0004943836448589	5H	7825449	7827234	+	ATP synthase subunit alpha
HORVU.MOREX.r3.6HG0618720	-3.84843539982438	0.0004940404666164	6H	521193565	521196900	-	Nitrate reductase
HORVU.MOREX.r3.2HG0107680	-3.85302213336941	0.0038301535415502	2H	25799689	25801998	+	BHLH domain-containing protein
HORVU.MOREX.r3.7HG0661920	-3.85302213336941	0.0038301535415502	7H	68389866	68396745	+	Auxin response factor
HORVU.MOREX.r3.6HG0594450	-3.86711606444821	4.9288958269158e-05	6H	361259096	361263429	-	Predicted protein
HORVU.MOREX.r3.6HG0562460	-3.8676351040909	4.92979918259738e-05	6H	82146469	82146766	-	Uncharacterized protein
HORVU.MOREX.r3.2HG0109470	-3.87210734051381	6.6522783988056e-06	2H	30261935	30262400	+	NAD(P)H dehydrogenase subunit H
HORVU.MOREX.r3.4HG0388110	-3.87210734051381	6.6522783988056e-06	4H	472601239	472601704	+	NAD(P)H dehydrogenase subunit H
HORVU.MOREX.r3.6HG0552250	-3.87952724604818	1.37835657708512e-07	6H	32715220	32716241	+	Predicted protein
HORVU.MOREX.r3.3HG0284740	-3.88204746471714	1.78457482281451e-06	3H	460993534	460996826	+	protein-serine/threonine phosphatase (EC 3.1.3.16)
HORVU.MOREX.r3.3HG0292960	-3.88238063060256	1.38374308453054e-07	3H	507796466	507800841	-	cytokinin dehydrogenase (EC 1.5.99.12)
HORVU.MOREX.r3.4HG0388030	-3.8966878901015	1.2884074537964099e-11	4H	472568869	472569439	-	Small ribosomal subunit protein uS3m (Ribosomal protein S3, mitochondrial)
HORVU.MOREX.r3.7HG0646220	-3.93576473391496	4.2633799896975e-25	7H	21834836	21838024	-	Predicted protein
HORVU.MOREX.r3.3HG0328670	-4.00252015540948	9.53788771998276e-13	3H	615137521	615137920	-	Ribosomal protein S1
HORVU.MOREX.r3.1HG0056730	-4.0409538947004	8.366972807660251e-09	1H	379399998	379403530	+	Lipoxygenase (EC 1.13.11.-)
HORVU.MOREX.r3.4HG0355580	-4.05748340414991	0.0003509354062161	4H	138549112	138549490	+	Protein TAR1
HORVU.MOREX.r3.4HG0335910	-4.06460445998957	0.0418049540419968	4H	13294664	13296865	-	Uncharacterized protein
HORVU.MOREX.r3.6HG0557640	-4.07863946307223	1.79993452613707e-76	6H	54278193	54280843	-	Predicted protein
HORVU.MOREX.r3.2HG0179060	-4.10218441154123	3.32835134413041e-07	2H	547445642	547446107	+	NAD(P)H dehydrogenase subunit H
HORVU.MOREX.r3.1HG0050060	-4.10290497366145	0.0038367789453141	1H	333585663	333586661	-	K-box domain-containing protein
HORVU.MOREX.r3.5HG0480840	-4.10987410475286	0.0026425633920617	5H	433692353	433692846	-	Prolamin-like domain-containing protein
HORVU.MOREX.r3.4HG0391600	-4.11647319899338	1.24199461844449e-12	4H	500116259	500119932	+	EF-hand domain-containing protein
HORVU.MOREX.r3.3HG0277760	-4.12392679098719	0.0022867333263677	3H	413719465	413721732	+	mannan endo-1,4-beta-mannosidase (EC 3.2.1.78)
HORVU.MOREX.r3.7HG0643120	-4.12392679098719	0.0022867333263677	7H	15879221	15880754	-	Aromatic-L-amino-acid decarboxylase
HORVU.MOREX.r3.6HG0562710	-4.14775345104244	4.44602562557385e-09	6H	82254640	82254937	-	Uncharacterized protein
HORVU.MOREX.r3.3HG0272660	-4.1515192491835	3.36869138703953e-11	3H	374279056	374279749	+	F-ATPase protein 6
HORVU.MOREX.r3.5HG0488810	-4.17279215211181	0.0292018005096957	5H	471941192	471946121	+	DUF6598 domain-containing protein
HORVU.MOREX.r3.4HG0374340	-4.17887413948364	9.64786510789451e-08	4H	349596139	349596544	+	Uncharacterized protein
HORVU.MOREX.r3.3HG0328560	-4.29741383598708	2.6488570379755102e-17	3H	615081222	615081621	-	Ribosomal protein S1
HORVU.MOREX.r3.4HG0338770	-4.29805301840124	2.5196434240623297e-12	4H	23496272	23498592	-	Predicted protein
HORVU.MOREX.r3.3HG0237880	-4.30273034207369	2.22900762192497e-12	3H	54662733	54666325	+	galactinol--sucrose galactosyltransferase (EC 2.4.1.82)
HORVU.MOREX.r3.5HG0490050	-4.37996331065193	2.72405734763397e-24	5H	475347749	475348022	-	ATP synthase protein MI25
HORVU.MOREX.r3.1HG0028380	-4.38957885408838	1.36572042559779e-05	1H	132097517	132097814	-	Uncharacterized protein
HORVU.MOREX.r3.5HG0435850	-4.4007585247006	2.1874995959954e-09	5H	53258842	53259139	-	Uncharacterized protein
HORVU.MOREX.r3.3HG0268490	-4.40197021916718	1.12561416240029e-35	3H	337936116	337936695	-	ATP synthase protein MI25
HORVU.MOREX.r3.3HG0223130	-4.41181977085543	0.0020555690394825	3H	9428732	9428924	+	Uncharacterized protein
HORVU.MOREX.r3.1HG0019970	-4.44465698042126	0.0019882531755948	1H	71449597	71451348	+	agmatine N(4)-coumaroyltransferase (EC 2.3.1.64)
HORVU.MOREX.r3.3HG0250820	-4.46044849725117	0.0013722720125679	3H	151441779	151444636	-	WPP domain-associated protein
HORVU.MOREX.r3.4HG0349920	-4.46044849725117	0.0013722720125679	4H	97231295	97232353	-	Uncharacterized protein
HORVU.MOREX.r3.4HG0400000	-4.46260356588843	0.0016508682150061	4H	550542874	550543450	-	DOMON domain-containing protein
HORVU.MOREX.r3.3HG0267040	-4.46969881397934	9.23035015770185e-07	3H	323387232	323388350	+	Farnesylated protein 3
HORVU.MOREX.r3.5HG0435490	-4.46969881397934	9.23035015770185e-07	5H	53064853	53065231	+	Protein TAR1
HORVU.MOREX.r3.5HG0436210	-4.52190131588666	2.22273865025317e-33	5H	53481609	53481906	-	Uncharacterized protein
HORVU.MOREX.r3.5HG0423410	-4.52998034418516	4.4932364476771803e-23	5H	7774177	7776212	-	Uncharacterized protein
HORVU.MOREX.r3.7HG0719350	-4.53122697609675	1.55759977776851e-25	7H	524087521	524088001	+	H(+)-transporting two-sector ATPase (EC 7.1.2.2) (Mitochondrial protein YMF19)
HORVU.MOREX.r3.4HG0416940	-4.55679465964514	8.0578045955151e-09	4H	605452999	605457523	+	Heat shock 70 kDa protein, mitochondrial
HORVU.MOREX.r3.5HG0490060	-4.55999279433231	2.6378499624613402e-20	5H	475357249	475359306	+	NADH-ubiquinone oxidoreductase chain 5
HORVU.MOREX.r3.5HG0435610	-4.56557776057486	9.57808851981678e-05	5H	53119179	53119476	-	Uncharacterized protein
HORVU.MOREX.r3.7HG0742440	-4.57034379214472	9.75398843567057e-05	7H	609325761	609327481	+	chitinase (EC 3.2.1.14)
HORVU.MOREX.r3.6HG0588790	-4.57046430898454	9.25447458002819e-05	6H	308715058	308716573	-	ATP synthase subunit alpha
HORVU.MOREX.r3.5HG0460480	-4.58552955899114	4.90615669879177e-14	5H	292313469	292314075	-	NADH-ubiquinone oxidoreductase chain 6 (EC 7.1.1.2) (NADH dehydrogenase subunit 6)
HORVU.MOREX.r3.6HG0562150	-4.62158888464189	5.4776019899278896e-11	6H	82010251	82010548	-	Uncharacterized protein
HORVU.MOREX.r3.5HG0462950	-4.6221711939513	7.9794185027698e-06	5H	312103266	312103701	-	NADH-ubiquinone oxidoreductase chain 6 (EC 7.1.1.2) (NADH dehydrogenase subunit 6)
HORVU.MOREX.r3.1HG0086450	-4.62358803444486	8.27484401849475e-06	1H	497690502	497702165	-	NBS-LRR disease resistance protein homologue
HORVU.MOREX.r3.5HG0444190	-4.62606896275213	4.82072307148897e-11	5H	110827643	110827928	-	Bet v I/Major latex protein domain-containing protein
HORVU.MOREX.r3.5HG0462960	-4.62934647254921	6.98184597500538e-06	5H	312104719	312104953	+	Uncharacterized protein
HORVU.MOREX.r3.3HG0268520	-4.65421844020351	2.10623478541498e-71	3H	337973493	337974072	-	ATP synthase protein MI25
HORVU.MOREX.r3.7HG0669480	-4.67147835339742	5.56142092730071e-07	7H	109225424	109226202	-	SHSP domain-containing protein
HORVU.MOREX.r3.6HG0568470	-4.74514025011438	3.46984093552591e-10	6H	112462552	112469161	+	Predicted protein
HORVU.MOREX.r3.5HG0436340	-4.7534739991469	2.6961881514832e-17	5H	53603470	53603788	+	Secreted protein
HORVU.MOREX.r3.2HG0185100	-4.82077229110009	1.19352064327586e-21	2H	573031374	573032661	+	Homeobox-leucine zipper protein (HD-ZIP protein) (Homeodomain transcription factor)
HORVU.MOREX.r3.4HG0355570	-4.89364653183458	1.68341081933521e-12	4H	138547572	138547869	-	Uncharacterized protein
HORVU.MOREX.r3.5HG0435530	-4.89562945831875	3.51269897245282e-08	5H	53081935	53082232	-	Uncharacterized protein
HORVU.MOREX.r3.6HG0545480	-4.89907802931644	4.5863302523365e-120	6H	16058167	16063648	+	Catalase (EC 1.11.1.6)
HORVU.MOREX.r3.3HG0287840	-4.90154195400023	6.93765485285043e-05	3H	479813259	479816256	+	Predicted protein
HORVU.MOREX.r3.7HG0747520	-4.90154195400023	6.93765485285043e-05	7H	619573418	619575516	+	Carbonic anhydrase (EC 4.2.1.1)
HORVU.MOREX.r3.3HG0252300	-4.9099675581203	0.0009385361343027	3H	163106653	163107716	+	Predicted protein
HORVU.MOREX.r3.3HG0324450	-4.91120880180868	4.58839677350497e-06	3H	606080553	606082020	-	PRISE-like Rossmann-fold domain-containing protein
HORVU.MOREX.r3.2HG0122190	-4.92353657728101	1.4631677752964601e-19	2H	81222417	81223292	-	RING-type domain-containing protein
HORVU.MOREX.r3.2HG0184620	-5.01121371469719	5.2118935995231004e-55	2H	570228804	570231947	+	STI1 domain-containing protein
HORVU.MOREX.r3.6HG0614080	-5.02998773141988	1.7433684640621799e-12	6H	498648756	498650370	-	Protein kinase domain-containing protein
HORVU.MOREX.r3.1HG0028870	-5.04734436778333	4.75695867389187e-57	1H	132490705	132491083	-	Protein TAR1
HORVU.MOREX.r3.1HG0028450	-5.05585710126517	3.0227336376820295e-11	1H	132159926	132160304	+	Protein TAR1
HORVU.MOREX.r3.4HG0344630	-5.07500761802668	1.58590845794729e-10	4H	53805667	53810999	+	Sucrose-phosphate synthase (EC 2.4.1.14)
HORVU.MOREX.r3.2HG0133820	-5.09664443859179	2.09802130998684e-09	2H	158835025	158835328	-	Uncharacterized protein
HORVU.MOREX.r3.2HG0099200	-5.24843033138025	4.88107306316501e-16	2H	9461241	9461728	+	NADH-ubiquinone oxidoreductase chain 1
HORVU.MOREX.r3.5HG0436000	-5.26009401505764	3.66354670182427e-06	5H	53314699	53314996	-	Uncharacterized protein
HORVU.MOREX.r3.7HG0714970	-5.26667942315585	3.61076348178514e-33	7H	497288079	497288782	+	Predicted protein
HORVU.MOREX.r3.5HG0516710	-5.27410554667727	1.31776749378923e-10	5H	541689638	541690610	+	Glutathione S-transferase (EC 2.5.1.18)
HORVU.MOREX.r3.3HG0237580	-5.30779207094786	6.06739353485114e-72	3H	52896420	52897201	-	Predicted protein
HORVU.MOREX.r3.7HG0752910	-5.33642736081033	5.45839726647249e-05	7H	632112661	632116570	-	Protein FAR1-RELATED SEQUENCE
HORVU.MOREX.r3.5HG0514350	-5.35947869368473	4.41646422412545e-05	5H	537012424	537014283	+	Predicted protein
HORVU.MOREX.r3.5HG0435740	-5.3691972682017	4.43316685864673e-05	5H	53175044	53175341	-	Uncharacterized protein
HORVU.MOREX.r3.2HG0133750	-5.41612872444002	1.4869864318351298e-11	2H	158790294	158790591	+	Uncharacterized protein
HORVU.MOREX.r3.5HG0435980	-5.48798386623668	1.13631926435845e-13	5H	53306928	53307306	+	Protein TAR1
HORVU.MOREX.r3.5HG0514310	-5.51131073177651	3.05037396391808e-07	5H	536945672	536947878	+	NAC domain-containing protein
HORVU.MOREX.r3.2HG0138930	-5.51790706156973	3.32835134413041e-07	2H	199823012	199823252	+	Uncharacterized protein
HORVU.MOREX.r3.2HG0159040	-5.53080294235063	2.5775661892851e-46	2H	403487567	403489877	-	BHLH domain-containing protein
HORVU.MOREX.r3.7HG0700950	-5.53193277854536	0.0006862000988757	7H	392689971	392690457	+	NADH-ubiquinone oxidoreductase chain 1
HORVU.MOREX.r3.7HG0719360	-5.53355844358131	1.6394799545530502e-112	7H	524095857	524096199	-	ATP synthase subunit 9, mitochondrial (Lipid-binding protein)
HORVU.MOREX.r3.4HG0402170	-5.54641680779217	0.0006810618799816	4H	559498744	559500854	+	HSF-type DNA-binding domain-containing protein
HORVU.MOREX.r3.6HG0625280	-5.65225071735589	1.3799790675439798e-11	6H	542296192	542299170	-	PGG domain-containing protein
HORVU.MOREX.r3.4HG0387940	-5.66260223896554	1.55452522021648e-11	4H	472505200	472505680	+	H(+)-transporting two-sector ATPase (EC 7.1.2.2) (Mitochondrial protein YMF19)
HORVU.MOREX.r3.4HG0389340	-5.663177961044	1.79914146446017e-81	4H	483650966	483651820	+	Predicted protein
HORVU.MOREX.r3.3HG0226110	-5.66764191120203	1.5622991067692598e-11	3H	14318478	14318934	+	SHSP domain-containing protein
HORVU.MOREX.r3.5HG0486200	-5.7055702485155	3.10799199544207e-06	5H	458452676	458454828	+	Predicted protein
HORVU.MOREX.r3.7HG0664810	-5.76111757965144	8.63139653954383e-88	7H	82614016	82615098	+	SHSP domain-containing protein
HORVU.MOREX.r3.5HG0435960	-5.79776549826126	1.2088684874938699e-12	5H	53297752	53298130	+	Protein TAR1
HORVU.MOREX.r3.1HG0028400	-5.91223773813109	5.6339343149289e-22	1H	132107657	132107954	-	Uncharacterized protein
HORVU.MOREX.r3.7HG0645790	-5.94651654744742	2.8403404114115904e-09	7H	21362717	21362972	+	Uncharacterized protein
HORVU.MOREX.r3.6HG0621200	-5.96861734045856	4.28729068197249e-39	6H	529914708	529915667	+	Predicted protein
HORVU.MOREX.r3.3HG0225320	-6.00796428582912	5.04746241992818e-05	3H	13219502	13219958	-	SHSP domain-containing protein
HORVU.MOREX.r3.2HG0198780	-6.01770471261305	4.43316685864673e-05	2H	621181476	621185219	-	Beta-glucosidase
HORVU.MOREX.r3.5HG0436270	-6.11946922070355	1.61986376471884e-17	5H	53493136	53493514	+	Protein TAR1
HORVU.MOREX.r3.2HG0127410	-6.15530246223681	2.8129335513663504e-15	2H	111586810	111611321	+	Predicted protein
HORVU.MOREX.r3.3HG0226120	-6.20803332271587	4.04186683773552e-08	3H	14342942	14343681	+	SHSP domain-containing protein
HORVU.MOREX.r3.7HG0717290	-6.20956085845273	0.0048924554160797	7H	508867172	508868325	-	HSF-type DNA-binding domain-containing protein
HORVU.MOREX.r3.3HG0242350	-6.26205862521512	9.252878630676139e-13	3H	83653083	83654050	+	Predicted protein
HORVU.MOREX.r3.4HG0399440	-6.43433394587389	1.1361117032696401e-20	4H	547682370	547682643	+	NADH dehydrogenase subunit 4L
HORVU.MOREX.r3.7HG0716560	-6.43433394587389	1.1361117032696401e-20	7H	504250292	504250565	+	NADH-ubiquinone oxidoreductase chain 4L (NADH dehydrogenase subunit 4L)
HORVU.MOREX.r3.6HG0562930	-6.5039965313325	2.43800511302783e-21	6H	82367129	82367426	-	Uncharacterized protein
HORVU.MOREX.r3.6HG0588430	-6.54256962457898	2.87911561334825e-102	6H	305145254	305145503	-	Uncharacterized protein
HORVU.MOREX.r3.7HG0664840	-6.60940756727689	2.6452104324426503e-25	7H	82742954	82744064	+	SHSP domain-containing protein
HORVU.MOREX.r3.1HG0083580	-6.61431747189431	0.0001860349363558	1H	492702410	492705128	+	Phospholipase D (EC 3.1.4.4)
HORVU.MOREX.r3.6HG0616910	-6.61431747189431	0.0001860349363558	6H	514512280	514514309	-	Clp ATPase C-terminal domain-containing protein
HORVU.MOREX.r3.7HG0698330	-6.61431747189431	0.0001860349363558	7H	368484135	368485298	+	Clp ATPase C-terminal domain-containing protein
HORVU.MOREX.r3.7HG0741100	-6.61431747189431	0.0001860349363558	7H	607198317	607205638	-	Uncharacterized protein
HORVU.MOREX.r3.7HG0741130	-6.61431747189431	0.0001860349363558	7H	607289981	607297573	-	Uncharacterized protein
HORVU.MOREX.r3.7HG0664870	-6.61537452360265	9.23035015770185e-07	7H	83014862	83015252	-	SHSP domain-containing protein
HORVU.MOREX.r3.3HG0225040	-6.6288650046142	8.11859038508414e-07	3H	12759737	12760193	-	SHSP domain-containing protein
HORVU.MOREX.r3.5HG0531010	-6.63681313921734	0.0001626319487219	5H	573741804	573743144	-	glutathione transferase (EC 2.5.1.18)
HORVU.MOREX.r3.7HG0666580	-6.63681313921734	0.0001626319487219	7H	93380213	93382354	-	AAA+ ATPase domain-containing protein
HORVU.MOREX.r3.7HG0664850	-6.86213628591394	3.9909813713962596e-11	7H	82803931	82804672	+	SHSP domain-containing protein
HORVU.MOREX.r3.2HG0160560	-6.87848209654091	7.481701890195569e-56	2H	418053311	418056464	-	peptidylprolyl isomerase (EC 5.2.1.8)
HORVU.MOREX.r3.5HG0489830	-7.01685676912701	2.34187802302544e-05	5H	474873997	474875142	-	SHSP domain-containing protein
HORVU.MOREX.r3.3HG0271170	-7.04245630210595	3.62225747124613e-08	3H	360342920	360345471	+	Predicted protein
HORVU.MOREX.r3.2HG0202020	-7.08844587181557	1.8066637359975e-05	2H	628045257	628047812	+	Predicted protein
HORVU.MOREX.r3.2HG0202050	-7.08844587181557	1.8066637359975e-05	2H	628119977	628122138	+	Predicted protein
HORVU.MOREX.r3.5HG0499140	-7.08844587181557	1.8066637359975e-05	5H	500426561	500430060	+	Predicted protein
HORVU.MOREX.r3.3HG0288370	-7.18169739807035	4.94389997792646e-40	3H	483142544	483146405	+	Clp R domain-containing protein
HORVU.MOREX.r3.2HG0210630	-7.20633796630681	9.483207224599e-09	2H	648279787	648280566	+	SHSP domain-containing protein
HORVU.MOREX.r3.3HG0302810	-7.29758259023694	2.3358549451844e-13	3H	550658248	550660768	-	Heat shock cognate 70 kDa protein
HORVU.MOREX.r3.1HG0026580	-7.32745107469647	6.4932831425215e-69	1H	114661377	114662088	-	NADH dehydrogenase [ubiquinone] iron-sulfur protein 3 (EC 7.1.1.2) (NADH dehydrogenase subunit 9)
HORVU.MOREX.r3.7HG0664900	-7.33296327698069	4.06298501043638e-39	7H	83113823	83114562	-	SHSP domain-containing protein
HORVU.MOREX.r3.4HG0374310	-7.48298323026492	2.23581553920982e-14	4H	349588264	349588471	+	NADH dehydrogenase subunit 4L
HORVU.MOREX.r3.4HG0396100	-7.529599572091	4.48901909048961e-07	4H	530688617	530691997	+	Predicted protein
HORVU.MOREX.r3.7HG0741070	-7.69887662189161	7.06699015087576e-07	7H	607087582	607097281	-	Uncharacterized protein
HORVU.MOREX.r3.6HG0545870	-7.70492477141459	6.8798164084064e-07	6H	16581912	16584828	+	Leucine-rich repeat-containing N-terminal plant-type domain-containing protein
HORVU.MOREX.r3.6HG0545890	-7.70492477141459	6.8798164084064e-07	6H	16601867	16604783	+	Leucine-rich repeat-containing N-terminal plant-type domain-containing protein
HORVU.MOREX.r3.6HG0545910	-7.70492477141459	6.8798164084064e-07	6H	16621797	16624713	+	Leucine-rich repeat-containing N-terminal plant-type domain-containing protein
HORVU.MOREX.r3.6HG0545930	-7.70492477141459	6.8798164084064e-07	6H	16641738	16644654	+	Leucine-rich repeat-containing N-terminal plant-type domain-containing protein
HORVU.MOREX.r3.3HG0328640	-7.78950745834068	4.07688689958248e-60	3H	615127818	615128391	-	NADH dehydrogenase [ubiquinone] iron-sulfur protein 3 (EC 7.1.1.2) (NADH dehydrogenase subunit 9)
HORVU.MOREX.r3.2HG0143630	-7.87825643736368	2.06615199143155e-57	2H	239578788	239579031	-	ATP synthase subunit 9, mitochondrial (Lipid-binding protein)
HORVU.MOREX.r3.4HG0344210	-7.91542545852074	2.24298597363119e-07	4H	51013380	51014381	+	SHSP domain-containing protein
HORVU.MOREX.r3.7HG0717280	-7.91542545852074	2.24298597363119e-07	7H	508866733	508866991	-	Uncharacterized protein
HORVU.MOREX.r3.7HG0741110	-7.91542545852074	2.24298597363119e-07	7H	607206320	607214777	-	Uncharacterized protein
HORVU.MOREX.r3.2HG0179200	-7.9430046291124	4.54071556556316e-54	2H	547502942	547503515	-	NADH dehydrogenase [ubiquinone] iron-sulfur protein 3 (EC 7.1.1.2) (NADH dehydrogenase subunit 9)
HORVU.MOREX.r3.7HG0743320	-8.03530603733821	1.4992128666956702e-17	7H	611444182	611445172	+	Gamma-tubulin complex component
HORVU.MOREX.r3.3HG0328530	-8.19420957359063	2.07276931964054e-47	3H	615071520	615072093	-	NADH dehydrogenase [ubiquinone] iron-sulfur protein 3 (EC 7.1.1.2) (NADH dehydrogenase subunit 9)
HORVU.MOREX.r3.4HG0418350	-8.22033318941356	6.033406491325689e-56	4H	608842465	608846992	-	Uncharacterized protein
HORVU.MOREX.r3.5HG0509970	-8.25804956449473	5.8824201575583805e-31	5H	525536323	525537516	-	HSF-type DNA-binding domain-containing protein
HORVU.MOREX.r3.7HG0664860	-8.29618651599345	1.5195144536851e-06	7H	82914093	82914786	+	SHSP domain-containing protein
HORVU.MOREX.r3.1HG0091620	-8.66672679392454	3.03617411285874e-09	1H	507347793	507348430	+	Predicted protein
HORVU.MOREX.r3.2HG0099870	-8.7661219344847	9.70082588588932e-47	2H	10674706	10677404	+	Histidine kinase/HSP90-like ATPase domain-containing protein
HORVU.MOREX.r3.7HG0664880	-8.96651645544178	5.22112523694074e-10	7H	83037627	83038245	-	SHSP domain-containing protein
HORVU.MOREX.r3.3HG0308770	-8.96793118615722	6.3357231063079e-23	3H	568041457	568041994	-	Uncharacterized protein
HORVU.MOREX.r3.2HG0170930	-9.08365041948398	1.65080370849452e-16	2H	494443871	494444839	+	SHSP domain-containing protein
HORVU.MOREX.r3.3HG0237700	-9.12534688892006	2.15791026241761e-10	3H	53684263	53684743	+	SHSP domain-containing protein
HORVU.MOREX.r3.4HG0387610	-9.27495498035236	8.503118695621509e-11	4H	471135076	471137420	-	Heat shock cognate 70 kDa protein
HORVU.MOREX.r3.4HG0392240	-9.31241337711106	2.37343667675371e-08	4H	504485742	504486975	-	SHSP domain-containing protein
HORVU.MOREX.r3.1HG0077030	-9.67507054898902	8.74521309956832e-20	1H	476905043	476908398	+	Chaperone protein ClpB1 (ATP-dependent Clp protease ATP-binding subunit ClpB homolog 1) (Casein lytic proteinase B1) (Heat shock protein 101)
HORVU.MOREX.r3.3HG0237690	-9.74874481519527	3.7912869175840103e-20	3H	53549727	53550459	+	SHSP domain-containing protein
HORVU.MOREX.r3.3HG0226130	-9.78542466383413	3.83397927696658e-12	3H	14346323	14347071	+	SHSP domain-containing protein
HORVU.MOREX.r3.7HG0683350	-9.82749306440248	4.07688689958248e-60	7H	199412518	199412938	-	Protein TAR1
HORVU.MOREX.r3.2HG0156100	1.05584323958179	0.0036086332551439	2H	375770863	375772935	+	Eukaryotic translation initiation factor 5A (eIF-5A)
HORVU.MOREX.r3.7HG0661420	1.05818846476835	0.0071009720333062	7H	66480498	66487268	-	Sucrose synthase (EC 2.4.1.13)
HORVU.MOREX.r3.1HG0090940	1.05865156114219	0.0144362676518006	1H	506233506	506236371	-	GTP-binding nuclear protein
HORVU.MOREX.r3.1HG0075620	1.07205352272159	0.0281724603354593	1H	472883000	472885062	-	Inhibitor I9 domain-containing protein
HORVU.MOREX.r3.2HG0208810	1.12763261183513	0.0136414444832383	2H	644199709	644202392	-	E2 ubiquitin-conjugating enzyme (EC 2.3.2.23)
HORVU.MOREX.r3.3HG0276570	1.15647824528976	0.015985077693096	3H	404452286	404456682	-	Isocitrate dehydrogenase [NADP] (EC 1.1.1.42)
HORVU.MOREX.r3.1HG0017720	1.19174883355663	0.0175842495851218	1H	56470653	56471993	-	glutathione transferase (EC 2.5.1.18)
HORVU.MOREX.r3.5HG0444110	1.19353810746989	0.0010523838559842	5H	110546142	110547012	-	Bet v I/Major latex protein domain-containing protein
HORVU.MOREX.r3.3HG0294710	1.21603976256726	0.0304539559012436	3H	515113616	515116108	-	Protein translation factor SUI1 homolog (Protein GOS2) (Protein eIF1) (Translation initiation factor 1)
HORVU.MOREX.r3.5HG0490180	1.22133182587882	0.0001688495473785	5H	475526822	475530641	-	Histidine kinase/HSP90-like ATPase domain-containing protein
HORVU.MOREX.r3.2HG0110760	1.22952623955366	0.0161973921087707	2H	33605688	33607819	+	Predicted protein
HORVU.MOREX.r3.5HG0443520	1.23113973215532	0.0336349437729722	5H	106325481	106326948	-	Predicted protein
HORVU.MOREX.r3.7HG0741050	1.24008211534124	0.0448269880605678	7H	606998324	607000327	+	Predicted protein
HORVU.MOREX.r3.2HG0204520	1.24687260642678	0.021171243476512	2H	634391620	634395467	+	Oryzain alpha chain
HORVU.MOREX.r3.4HG0334800	1.27505746778486	0.0467266601595026	4H	9690089	9693510	-	CHCH domain containing protein, expressed (Predicted protein)
HORVU.MOREX.r3.7HG0644470	1.29934106873874	0.0469492100939699	7H	18692218	18693117	+	Histone H3
HORVU.MOREX.r3.4HG0333030	1.31463918680333	0.0022867333263677	4H	4676410	4677377	+	Dehydrin 13 (Predicted protein)
HORVU.MOREX.r3.3HG0221040	1.37460118763051	0.0411961900539837	3H	5468219	5471756	-	Fructose-bisphosphate aldolase (EC 4.1.2.13)
HORVU.MOREX.r3.7HG0751310	1.39671043603353	0.0471008076832392	7H	627320380	627322381	-	HMG box domain-containing protein
HORVU.MOREX.r3.3HG0296260	1.4004471838814	0.0185820782614514	3H	523226436	523229362	+	ADP-ribosylation factor
HORVU.MOREX.r3.1HG0076120	1.42910657737531	0.0444031885080503	1H	473999975	474003158	+	Patellin-5
HORVU.MOREX.r3.7HG0684090	1.5057179295326	0.0245907269806315	7H	206102536	206105424	-	NTF2 domain-containing protein
HORVU.MOREX.r3.6HG0538250	1.52576765739119	0.0161276326753051	6H	78235	80079	-	SKP1-like protein
HORVU.MOREX.r3.3HG0290290	1.53280898008234	0.0198750017891731	3H	495710502	495714856	-	Aspartate aminotransferase (EC 2.6.1.1)
HORVU.MOREX.r3.6HG0601540	1.53568166735037	0.044523481372148	6H	417222540	417225450	+	methionine adenosyltransferase (EC 2.5.1.6)
HORVU.MOREX.r3.4HG0336870	1.57519653456819	0.0061759338449756	4H	16637082	16638916	-	Glutathione S-transferase 3, mitochondrial (EC 4.4.1.20) (Glutathione peroxidase MGST3) (LTC4 synthase MGST3)
HORVU.MOREX.r3.2HG0173530	1.58085904991987	0.0001215391938809	2H	513464889	513468342	+	14-3-3 domain-containing protein
HORVU.MOREX.r3.4HG0333810	1.60080430199806	0.0003451518666813	4H	6441941	6442945	+	RRM domain-containing protein
HORVU.MOREX.r3.7HG0651580	1.60603075145208	4.43316685864673e-05	7H	32708119	32710502	+	Profilin
HORVU.MOREX.r3.6HG0624640	1.60918912967181	0.0054830377973958	6H	540936029	540937772	+	Uncharacterized protein
HORVU.MOREX.r3.4HG0391130	1.61010172112957	0.0146951501822863	4H	495959205	495963504	+	RING-type E3 ubiquitin transferase (EC 2.3.2.27)
HORVU.MOREX.r3.3HG0297100	1.61179402727225	0.0151757425057884	3H	527385949	527390369	+	phosphoglycerate mutase (2,3-diphosphoglycerate-independent) (EC 5.4.2.12)
HORVU.MOREX.r3.5HG0468290	1.6120950306064	0.026076661803928	5H	350829397	350834230	-	Polyadenylate-binding protein (PABP)
HORVU.MOREX.r3.7HG0750080	1.62266605970645	0.0340119472109138	7H	624404099	624405903	+	4-hydroxy-4-methyl-2-oxoglutarate aldolase (HMG aldolase) (EC 4.1.1.112) (EC 4.1.3.17) (Oxaloacetate decarboxylase)
HORVU.MOREX.r3.4HG0349380	1.62528266275662	0.0011925807293572	4H	92076530	92079177	+	60S ribosomal protein L3
HORVU.MOREX.r3.5HG0473560	1.63696433061905	0.0331256003850398	5H	390645598	390646355	-	Predicted protein
HORVU.MOREX.r3.3HG0284020	1.65562206249523	0.0286680207157248	3H	457471151	457476209	+	non-specific serine/threonine protein kinase (EC 2.7.11.1)
HORVU.MOREX.r3.1HG0083730	1.65596283399203	0.0286752842770809	1H	493176743	493177306	+	Bifunctional inhibitor/plant lipid transfer protein/seed storage helical domain-containing protein
HORVU.MOREX.r3.5HG0424560	1.65774129341907	0.045154845385744	5H	9809558	9811573	-	glutathione transferase (EC 2.5.1.18)
HORVU.MOREX.r3.5HG0479000	1.6601195860051	1.59958923398904e-05	5H	423592017	423593781	-	cinnamyl-alcohol dehydrogenase (EC 1.1.1.195)
HORVU.MOREX.r3.5HG0473580	1.66648235996609	0.044731399187491	5H	390735220	390735948	+	Predicted protein
HORVU.MOREX.r3.4HG0341070	1.68479064578588	0.0267950873701053	4H	32425345	32426402	-	Auxin-repressed protein
HORVU.MOREX.r3.2HG0194280	1.69756265030067	9.66340790776432e-05	2H	609202079	609204879	+	Predicted protein
HORVU.MOREX.r3.1HG0030590	1.71111006631067	0.0385927569841217	1H	149483150	149487001	-	Mitochondrial dicarboxylate/tricarboxylate transporter DTC
HORVU.MOREX.r3.2HG0209020	1.71672415894077	0.014870912282237	2H	644692787	644694030	-	Predicted protein
HORVU.MOREX.r3.7HG0714960	1.73180300061993	0.0002647889369892	7H	497109074	497112956	-	lactoylglutathione lyase (EC 4.4.1.5) (Glyoxalase I)
HORVU.MOREX.r3.5HG0457850	1.73400756177853	0.0360924976588343	5H	263268316	263270827	-	Predicted protein
HORVU.MOREX.r3.1HG0003140	1.73832096107441	0.0007967786918844	1H	6142234	6145606	+	Predicted protein
HORVU.MOREX.r3.2HG0125550	1.76691852656769	0.0008496569505271	2H	101511161	101514199	+	Translation elongation factor EF1B beta/delta subunit guanine nucleotide exchange domain-containing protein
HORVU.MOREX.r3.2HG0149410	1.76715873628639	0.0191374202183985	2H	312614559	312623999	-	Thioredoxin
HORVU.MOREX.r3.6HG0596500	1.79285476999554	0.0197740278721771	6H	377231389	377236948	-	Adenosine kinase (AK) (EC 2.7.1.20) (Adenosine 5'-phosphotransferase)
HORVU.MOREX.r3.5HG0459240	1.80215497211759	6.74740841546305e-05	5H	278378114	278381155	-	DUF3700 domain-containing protein
HORVU.MOREX.r3.2HG0113700	1.80445685564892	0.0480162454572247	2H	44837497	44839462	-	Stress-related protein
HORVU.MOREX.r3.7HG0687630	1.80896019053586	0.0005049703024656	7H	238654015	238656869	-	Acyl carrier protein
HORVU.MOREX.r3.2HG0212570	1.8321746509533	0.0011925807293572	2H	652048026	652052197	+	Calreticulin
HORVU.MOREX.r3.7HG0703580	1.83630843895615	6.8722187155649195e-12	7H	415052429	415055809	-	Glyceraldehyde-3-phosphate dehydrogenase (EC 1.2.1.-)
HORVU.MOREX.r3.4HG0337050	1.839001885761	2.27618448209609e-07	4H	16992998	16996053	+	Predicted protein
HORVU.MOREX.r3.7HG0640790	1.84318094218356	0.0069030058198638	7H	11587547	11589367	+	ACB domain-containing protein
HORVU.MOREX.r3.6HG0612960	1.85062917582509	0.0423301694966025	6H	493665452	493666712	+	Nudix hydrolase domain-containing protein
HORVU.MOREX.r3.6HG0574540	1.85256772024071	0.0002080295560377	6H	159074206	159076775	+	S-adenosylmethionine synthase (EC 2.5.1.6)
HORVU.MOREX.r3.3HG0312010	1.85372501553423	0.0017432707752831	3H	579344136	579347246	-	Predicted protein
HORVU.MOREX.r3.4HG0332030	1.8620583088425	0.0017002155670042	4H	2308154	2310748	-	Ubiquitin-like domain-containing protein
HORVU.MOREX.r3.2HG0115300	1.86468515713513	8.58602817259249e-05	2H	50452321	50455802	+	superoxide dismutase (EC 1.15.1.1)
HORVU.MOREX.r3.1HG0070060	1.86651307801967	5.7450554177983395e-11	1H	449500000	449504214	+	ADP-ribosylation factor
HORVU.MOREX.r3.5HG0534850	1.86888307973627	0.0061685266148519	5H	580803319	580807813	-	PCI domain-containing protein
HORVU.MOREX.r3.5HG0524560	1.88492442640693	0.0203249661220263	5H	559483253	559489036	-	Methylenetetrahydrofolate reductase
HORVU.MOREX.r3.2HG0123880	1.88519335366216	0.0108523144243205	2H	91731548	91735333	+	Phospho-2-dehydro-3-deoxyheptonate aldolase (EC 2.5.1.54)
HORVU.MOREX.r3.2HG0124930	1.88584482271767	0.0372365907389053	2H	97897998	97901926	+	Predicted protein
HORVU.MOREX.r3.5HG0474540	1.88733956566682	0.0396561039462622	5H	397161661	397165674	+	Translocon Sec61/SecY plug domain-containing protein
HORVU.MOREX.r3.5HG0481240	1.88944452372639	0.0201344252585028	5H	435142876	435146202	-	AP2/ERF domain-containing protein
HORVU.MOREX.r3.1HG0087980	1.90528694276612	0.0099165601254778	1H	500272615	500273349	-	Predicted protein
HORVU.MOREX.r3.5HG0512600	1.94292451589081	0.0163254846191476	5H	531852112	531853677	+	Peroxidase (EC 1.11.1.7)
HORVU.MOREX.r3.7HG0668510	1.94301884317345	4.55405855068533e-12	7H	104749781	104751293	-	Uncharacterized protein
HORVU.MOREX.r3.5HG0454740	1.94529577503613	0.0160085684722636	5H	232716700	232718924	+	V-type proton ATPase proteolipid subunit
HORVU.MOREX.r3.2HG0141620	1.95220315497773	0.0322413539947944	2H	218840442	218842835	+	Autophagy-related protein
HORVU.MOREX.r3.2HG0107850	1.96853852969181	1.7696381610298e-08	2H	26105555	26108741	+	Elongation factor 1-alpha
HORVU.MOREX.r3.1HG0090780	1.97077165971075	0.0144694204489211	1H	505778030	505781621	-	Ketol-acid reductoisomerase (EC 1.1.1.86) (Acetohydroxy-acid reductoisomerase) (Alpha-keto-beta-hydroxylacyl reductoisomerase)
HORVU.MOREX.r3.6HG0589360	1.98463154743109	0.0284349901017488	6H	315174639	315179113	-	Uncharacterized protein
HORVU.MOREX.r3.3HG0280920	1.98682196814106	0.0166055678170285	3H	438399894	438400756	+	Uncharacterized protein
HORVU.MOREX.r3.1HG0067190	1.99306021908368	0.0033857880910766	1H	437403223	437403955	-	Bowman-Birk serine protease inhibitors family domain-containing protein
HORVU.MOREX.r3.6HG0601660	2.00425009256879	0.0258776638889966	6H	418003211	418005921	+	S-adenosylmethionine synthase (EC 2.5.1.6)
HORVU.MOREX.r3.2HG0188290	2.0106101044634	0.0314372650838971	2H	591323808	591326079	-	Uncharacterized protein
HORVU.MOREX.r3.7HG0668880	2.01506678995612	0.0074760132191926	7H	106099377	106100253	+	SCP domain-containing protein
HORVU.MOREX.r3.5HG0502860	2.01873116326962	0.0257474732647532	5H	510245438	510245952	-	Histone H4
HORVU.MOREX.r3.7HG0644460	2.02301302577262	0.0064497189308982	7H	18667526	18668499	+	Histone H3
HORVU.MOREX.r3.2HG0137190	2.03270443209788	0.0248129405574216	2H	185333512	185336044	-	Phenylalanine ammonia-lyase (EC 4.3.1.24)
HORVU.MOREX.r3.2HG0160800	2.03374105310113	0.0030470077226747	2H	420203894	420208944	-	Uncharacterized protein
HORVU.MOREX.r3.6HG0613270	2.03899761824525	1.70881435942064e-07	6H	495214922	495218750	-	Glutamine synthetase (EC 6.3.1.2)
HORVU.MOREX.r3.7HG0635320	2.04481451486885	0.0471008076832392	7H	2829471	2832563	+	BAG domain-containing protein
HORVU.MOREX.r3.1HG0063360	2.04547228609876	0.0105371811371051	1H	418191923	418194960	+	BI1-like protein
HORVU.MOREX.r3.3HG0303840	2.06854588309836	0.0458586048833726	3H	553984405	553987749	-	BAG family molecular chaperone regulator 4
HORVU.MOREX.r3.5HG0526180	2.07037198136513	0.004187816345942	5H	562972162	562974160	+	Predicted protein
HORVU.MOREX.r3.5HG0441860	2.07723495717462	0.0023313568892923	5H	91777220	91781821	-	Predicted protein
HORVU.MOREX.r3.3HG0241720	2.0888821998962	0.0197740278721771	3H	80453000	80457216	+	Phospholipase D (EC 3.1.4.4)
HORVU.MOREX.r3.1HG0043190	2.09965231767975	0.0327229019597906	1H	278983847	278986880	+	Malate dehydrogenase (EC 1.1.1.37)
HORVU.MOREX.r3.2HG0178520	2.10051509514072	0.0182819065313453	2H	544526690	544530487	-	Endoglucanase (EC 3.2.1.4)
HORVU.MOREX.r3.6HG0579370	2.1008845434029	0.0400735582954632	6H	196640321	196648376	-	Aminopeptidase (EC 3.4.11.-)
HORVU.MOREX.r3.3HG0299820	2.10910895283231	0.0401800494742585	3H	538581285	538581956	-	Histone H3
HORVU.MOREX.r3.2HG0201400	2.11470956638563	0.0079049569436376	2H	626360475	626364141	+	Serine hydroxymethyltransferase (EC 2.1.2.1)
HORVU.MOREX.r3.3HG0276950	2.124019938755	0.0402464456749489	3H	407750419	407754279	+	Predicted protein
HORVU.MOREX.r3.7HG0726690	2.12923792273182	0.0173678746778881	7H	563635587	563640424	+	Delta-aminolevulinic acid dehydratase (EC 4.2.1.24)
HORVU.MOREX.r3.5HG0421370	2.1342186775776	3.46315978282788e-05	5H	4909829	4922212	+	phosphopyruvate hydratase (EC 4.2.1.11)
HORVU.MOREX.r3.2HG0100660	2.13586735442939	0.0161709208987186	2H	11986451	11989711	+	Rhomboid-like protein
HORVU.MOREX.r3.5HG0509800	2.1396987290568	0.0069717563141845	5H	525045830	525049240	+	Histone H2A
HORVU.MOREX.r3.5HG0467810	2.16329611363113	0.0345628055370478	5H	346938110	346944481	+	aspartate--tRNA ligase (EC 6.1.1.12)
HORVU.MOREX.r3.6HG0555660	2.16452867437193	0.0338715119027367	6H	45253181	45256807	+	Calnexin
HORVU.MOREX.r3.4HG0418850	2.17325763542543	0.0107336524770578	4H	609846235	609847193	+	Germin-like protein
HORVU.MOREX.r3.5HG0517500	2.18355748846212	0.035152204091708	5H	543843426	543848031	-	E2 ubiquitin-conjugating enzyme (EC 2.3.2.23)
HORVU.MOREX.r3.1HG0057590	2.19487246846522	5.77600773298015e-06	1H	383419736	383422307	+	Nucleoside diphosphate kinase (EC 2.7.4.6)
HORVU.MOREX.r3.2HG0100900	2.20812298678253	0.0299243054717517	2H	12218909	12233312	-	Phosphoglycerate mutase-like protein 1
HORVU.MOREX.r3.3HG0287730	2.21010004100907	0.0017304938390799	3H	478735846	478740983	-	Glutamate carboxypeptidase 2
HORVU.MOREX.r3.4HG0383530	2.22178844166626	0.0117507432249977	4H	440072479	440173196	-	Bet v I/Major latex protein domain-containing protein
HORVU.MOREX.r3.2HG0163590	2.22960807429916	0.029539986718487	2H	438669348	438673095	-	Membrane-anchored ubiquitin-fold protein
HORVU.MOREX.r3.1HG0067160	2.24388919851262	0.0040960992432129	1H	437250815	437251854	-	Predicted protein
HORVU.MOREX.r3.4HG0333100	2.24413042585206	0.0014714157892022	4H	4808802	4814643	+	5-methyltetrahydropteroyltriglutamate--homocysteine S-methyltransferase (EC 2.1.1.14)
HORVU.MOREX.r3.4HG0407580	2.24720014451772	1.36266453876222e-05	4H	579244758	579246276	-	Predicted protein (Tonoplast intrinsic protein)
HORVU.MOREX.r3.2HG0146530	2.25048657020007	0.0265132148574803	2H	276977144	276980155	+	ATP synthase subunit delta', mitochondrial (F-ATPase delta' subunit)
HORVU.MOREX.r3.5HG0483810	2.2537107469027	0.0104201640385988	5H	444180988	444183073	-	Predicted protein
HORVU.MOREX.r3.6HG0616540	2.25798694008594	0.0005407175931463	6H	512847962	512852948	+	peptidylprolyl isomerase (EC 5.2.1.8)
HORVU.MOREX.r3.2HG0095670	2.26261042101708	0.0100661981846887	2H	580198	583787	-	Cysteine synthase (EC 2.5.1.47)
HORVU.MOREX.r3.7HG0657860	2.26452260889353	0.0037374277214438	7H	54112100	54116950	+	H(+)-exporting diphosphatase (EC 7.1.3.1)
HORVU.MOREX.r3.6HG0576010	2.27588162944314	0.0257474732647532	6H	170242278	170246119	-	Protein kinase domain-containing protein
HORVU.MOREX.r3.6HG0540760	2.27977426727841	0.0257620932035586	6H	6812130	6815709	-	Uncharacterized protein
HORVU.MOREX.r3.3HG0329570	2.29049991820702	0.0003573744033158	3H	617199839	617200644	+	Metallothionein-like protein
HORVU.MOREX.r3.7HG0739170	2.29074517543587	0.008951953735137	7H	601770840	601777774	+	V-type proton ATPase catalytic subunit A (EC 7.1.2.2) (V-ATPase 69 kDa subunit) (Vacuolar proton pump subunit alpha)
HORVU.MOREX.r3.7HG0726010	2.29239556174039	0.0005348820048188	7H	560252262	560255108	-	Peptidyl-prolyl cis-trans isomerase (PPIase) (EC 5.2.1.8)
HORVU.MOREX.r3.7HG0691650	2.29526722346354	0.0248129405574216	7H	278955754	278959927	+	G3BP-like protein
HORVU.MOREX.r3.5HG0504050	2.30241029406597	0.0225444400109781	5H	512183108	512184647	-	Cupin type-1 domain-containing protein
HORVU.MOREX.r3.1HG0065530	2.30565857627803	0.0007986376479231	1H	429151867	429152829	-	Uncharacterized protein
HORVU.MOREX.r3.6HG0608130	2.30701390677708	0.0011214257444052	6H	466797571	466801166	-	ATP synthase subunit O, mitochondrial
HORVU.MOREX.r3.5HG0469820	2.32837081046134	0.0027008023078255	5H	363732109	363735850	+	Coatomer subunit zeta
HORVU.MOREX.r3.4HG0418890	2.33198439212156	0.0266680784415686	4H	609867202	609868120	+	Germin-like protein
HORVU.MOREX.r3.6HG0591170	2.33597415327577	0.0201961262450032	6H	331938379	331939524	-	High-affinity nitrate transporter
HORVU.MOREX.r3.3HG0257920	2.35291763814833	0.0002453807036056	3H	213145811	213165369	+	EF-hand domain-containing protein
HORVU.MOREX.r3.4HG0368710	2.36344976178212	0.0203157683079709	4H	271139166	271142818	-	ADP-ribosylation factor-like protein 5
HORVU.MOREX.r3.5HG0517170	2.36792868803528	0.0063736762005823	5H	543008073	543011938	-	FAS1 domain-containing protein
HORVU.MOREX.r3.7HG0716730	2.36839274655822	9.23035015770185e-07	7H	504687162	504690570	+	Elongation factor 1-gamma 2
HORVU.MOREX.r3.7HG0662210	2.37603851645758	0.0182191971960334	7H	69097130	69100963	-	T-complex protein 1 subunit delta
HORVU.MOREX.r3.3HG0309210	2.3763858993449	0.0179026660891326	3H	569641209	569649865	-	Obg-like ATPase 1
HORVU.MOREX.r3.7HG0730350	2.37836231912688	0.0488427588329991	7H	577691373	577692152	-	Histone H2A
HORVU.MOREX.r3.5HG0530190	2.3787057702543	2.38350910807672e-06	5H	571759522	571762237	+	Ferredoxin
HORVU.MOREX.r3.5HG0430870	2.38265667711201	0.0481544514969983	5H	30477902	30482788	-	Sulfurtransferase
HORVU.MOREX.r3.4HG0345740	2.3913974792177	0.0003579972576279	4H	62961422	62964755	+	alcohol dehydrogenase (EC 1.1.1.1)
HORVU.MOREX.r3.7HG0663470	2.39678295810641	0.0467988652574411	7H	75940776	75943718	-	WAT1-related protein
HORVU.MOREX.r3.5HG0495890	2.39771128413034	0.0173678746778881	5H	491469453	491470266	-	Ferredoxin
HORVU.MOREX.r3.2HG0120050	2.39816970076251	0.0498292138335743	2H	69993947	69997525	-	Predicted protein
HORVU.MOREX.r3.7HG0686790	2.40225988826375	0.0164574790796669	7H	226677684	226683643	+	Predicted protein
HORVU.MOREX.r3.6HG0553760	2.40519191388225	0.0164772633488283	6H	36977920	36981904	-	Mitochondrial ATP synthase
HORVU.MOREX.r3.2HG0218010	2.40973191497087	0.0458148028751327	2H	665280911	665285032	+	Dolichyl-diphosphooligosaccharide--protein glycosyltransferase subunit 1
HORVU.MOREX.r3.4HG0418810	2.41010498754368	0.0248129405574216	4H	609825260	609826297	+	Germin-like protein
HORVU.MOREX.r3.2HG0113190	2.41226829072617	0.0020606136049981	2H	43264907	43269312	-	UDP-glucuronic acid decarboxylase 1 (EC 4.1.1.35) (UDP-glucuronate decarboxylase 1)
HORVU.MOREX.r3.4HG0363180	2.41449676443466	6.05505577123444e-19	4H	213772594	213774669	-	Predicted protein
HORVU.MOREX.r3.3HG0230590	2.41998472954922	0.0005598551595808	3H	23345084	23348486	+	Triosephosphate isomerase, cytosolic (EC 5.3.1.1)
HORVU.MOREX.r3.1HG0061370	2.42051534127255	0.0443487389007299	1H	407200050	407205622	+	Phospholipid/glycerol acyltransferase domain-containing protein
HORVU.MOREX.r3.4HG0384600	2.42448368886383	0.005246861523936	4H	449840461	449843487	+	RanBD1 domain-containing protein
HORVU.MOREX.r3.2HG0182080	2.42712448146591	0.015292556195958	2H	560599100	560601749	+	Phenylalanine ammonia-lyase (EC 4.3.1.24)
HORVU.MOREX.r3.2HG0182090	2.42712448146591	0.015292556195958	2H	560662549	560665232	-	Phenylalanine ammonia-lyase (EC 4.3.1.24)
HORVU.MOREX.r3.5HG0446360	2.42892947991634	0.0437462341044698	5H	128794886	128797563	+	Acyl carrier protein
HORVU.MOREX.r3.7HG0696930	2.42958073741589	0.0432412791235611	7H	351891541	351896398	-	RRM domain-containing protein
HORVU.MOREX.r3.4HG0378160	2.4382280720505	0.0052110678086075	4H	388113959	388116144	+	Ribosomal protein L19
HORVU.MOREX.r3.7HG0724830	2.43978767819367	4.60611176594588e-05	7H	553496228	553498165	-	Zinc finger A20 and AN1 domain-containing stress-associated protein 8
HORVU.MOREX.r3.5HG0514790	2.44213732388343	2.2748369667948403e-14	5H	538099749	538277813	-	Elongation factor 1-alpha
HORVU.MOREX.r3.7HG0693350	2.44601165623906	0.0418049540419968	7H	302547077	302560205	+	PABP
HORVU.MOREX.r3.4HG0408300	2.45246767521449	0.000583951440462	4H	581807913	581810860	-	Uncharacterized protein
HORVU.MOREX.r3.2HG0119500	2.45268140334306	0.0425038224199226	2H	67301734	67305025	+	Gamma carbonic anhydrase
HORVU.MOREX.r3.4HG0335500	2.45540445095708	0.0406979911181811	4H	11921419	11924001	-	Proteasome subunit beta
HORVU.MOREX.r3.5HG0519970	2.46397905406778	3.7397987983551e-05	5H	549314134	549315294	+	Predicted protein
HORVU.MOREX.r3.5HG0424890	2.46854944932341	0.0396066359952555	5H	10575584	10577109	+	glutathione transferase (EC 2.5.1.18)
HORVU.MOREX.r3.7HG0747470	2.47327326542053	0.0012580907368591	7H	619420279	619423436	+	Predicted protein
HORVU.MOREX.r3.1HG0056010	2.48160992208339	0.0384153639534533	1H	374227209	374233630	+	Predicted protein
HORVU.MOREX.r3.5HG0421460	2.48463844407861	6.4382155530827106e-21	5H	5219755	5220806	-	Predicted protein
HORVU.MOREX.r3.5HG0500570	2.48558765434535	0.0382576858308665	5H	504763025	504769728	-	Synaptotagmin
HORVU.MOREX.r3.3HG0286300	2.4999292130905	0.0369471159332439	3H	470630393	470631248	-	Predicted protein
HORVU.MOREX.r3.5HG0502750	2.50122481789631	0.0391570340562543	5H	510148670	510149167	+	Histone H4
HORVU.MOREX.r3.1HG0081340	2.50379086062677	0.0374764167954167	1H	488342709	488343441	+	Uncharacterized protein
HORVU.MOREX.r3.2HG0185030	2.50861109397941	0.0381260020272823	2H	572534621	572540193	+	HTH cro/C1-type domain-containing protein
HORVU.MOREX.r3.1HG0069750	2.5089492308074	6.00259216976116e-09	1H	448683350	448685648	+	Predicted protein
HORVU.MOREX.r3.4HG0340560	2.51434726067101	0.0009301964412646	4H	30606508	30610888	-	CBS domain-containing protein
HORVU.MOREX.r3.4HG0349120	2.51438760869007	1.608375518374e-05	4H	90669593	90672107	+	V-type proton ATPase proteolipid subunit
HORVU.MOREX.r3.4HG0370350	2.51567567427273	0.0372075870640736	4H	301232490	301244777	-	Pre-mRNA-processing factor 17
HORVU.MOREX.r3.6HG0596040	2.51720660365793	0.0009049066606386	6H	373430223	373435992	+	Succinate--CoA ligase [ADP-forming] subunit beta, mitochondrial (EC 6.2.1.5) (Succinyl-CoA synthetase beta chain) (SCS-beta)
HORVU.MOREX.r3.3HG0299830	2.52861222149561	0.0346096688819949	3H	538604769	538607369	-	Predicted protein
HORVU.MOREX.r3.7HG0640180	2.52891643516304	0.0107281076695574	7H	10453473	10455780	-	Ozone-responsive stress-related protein
HORVU.MOREX.r3.7HG0635300	2.5309087813713	0.0364150900770804	7H	2749116	2752281	-	Sucrose:fructan 6-fructosyltransferase (EC 2.4.1.10)
HORVU.MOREX.r3.2HG0208270	2.53463251356062	0.0342505970041996	2H	643181632	643186773	-	Superoxide dismutase (EC 1.15.1.1)
HORVU.MOREX.r3.6HG0539520	2.54137855300781	0.0040934396238143	6H	3594401	3598905	-	STI1 domain-containing protein
HORVU.MOREX.r3.3HG0303330	2.54819956522489	0.0364150900770804	3H	552388479	552389152	-	Histone H4
HORVU.MOREX.r3.2HG0214820	2.55497215792305	0.0324977440981728	2H	657275189	657288180	-	Predicted protein
HORVU.MOREX.r3.4HG0369570	2.55628368791712	3.10799199544207e-06	4H	292176330	292178886	+	UDP-arabinopyranose mutase (EC 5.4.99.30)
HORVU.MOREX.r3.7HG0697810	2.56362533860249	8.41515931063986e-07	7H	359800980	359807342	+	Co-chaperone protein p23
HORVU.MOREX.r3.3HG0304680	2.56528436424605	8.434860810648709e-11	3H	556765642	556768015	+	Fructose-bisphosphate aldolase (EC 4.1.2.13)
HORVU.MOREX.r3.7HG0639360	2.56578787932007	0.0352595061742549	7H	9154930	9159658	-	Predicted protein
HORVU.MOREX.r3.5HG0484150	2.57748817663421	0.0030283047725252	5H	446525605	446526769	-	poly(A)-specific ribonuclease (EC 3.1.13.4)
HORVU.MOREX.r3.7HG0645350	2.5783726261206	0.0115858738562938	7H	20552561	20556086	-	transketolase (EC 2.2.1.1)
HORVU.MOREX.r3.3HG0309580	2.57838905881679	0.0009719942412756	3H	570838107	570840006	+	RRM domain-containing protein
HORVU.MOREX.r3.5HG0447600	2.58314747346418	0.0301168060455677	5H	139799221	139803136	+	Guanylate kinase 1 (EC 2.7.4.8) (GMP kinase 1)
HORVU.MOREX.r3.1HG0026070	2.58467223862955	3.80314082157638e-10	1H	110682447	110684795	+	Ribosomal protein L10e/L16 domain-containing protein
HORVU.MOREX.r3.4HG0413800	2.5871364720748	0.0298148287159433	4H	597882364	597885286	-	RHOMBOID-like protein (EC 3.4.21.105)
HORVU.MOREX.r3.2HG0168950	2.59343621687206	0.0084809345561237	2H	479627910	479631053	-	SLL1 protein
HORVU.MOREX.r3.5HG0488040	2.59393971451793	0.0298917292103389	5H	468298980	468299985	+	Phytocyanin domain-containing protein
HORVU.MOREX.r3.2HG0122530	2.59985736683491	0.0315646598436718	2H	82424260	82459733	-	Uncharacterized protein
HORVU.MOREX.r3.3HG0221750	2.60224917271079	0.0022283949135034	3H	6923836	6924884	+	Uncharacterized protein
HORVU.MOREX.r3.1HG0092090	2.61890386847985	0.0298148287159433	1H	508259998	508266505	+	GBF-interacting protein 1 N-terminal domain-containing protein
HORVU.MOREX.r3.2HG0111610	2.62718766182032	0.0274996018680563	2H	37735771	37741646	-	Cellulose synthase (EC 2.4.1.12)
HORVU.MOREX.r3.7HG0668730	2.63317543061894	0.0264606459133863	7H	105517340	105523132	-	Pyrophosphate--fructose 6-phosphate 1-phosphotransferase subunit beta (PFP) (EC 2.7.1.90) (6-phosphofructokinase, pyrophosphate dependent) (PPi-PFK) (Pyrophosphate-dependent 6-phosphofructose-1-kinase)
HORVU.MOREX.r3.5HG0509900	2.6387166582322	0.0072769808095624	5H	525238006	525241137	-	Predicted protein
HORVU.MOREX.r3.1HG0002280	2.64092778093306	0.026980706779179	1H	4889936	4891855	-	NADH:flavin oxidoreductase/NADH oxidase N-terminal domain-containing protein
HORVU.MOREX.r3.3HG0256390	2.64920165928919	0.0018486625778477	3H	197288465	197291269	+	26S proteasome complex subunit SEM1
HORVU.MOREX.r3.1HG0080720	2.65544795631353	0.000659596844814	1H	486791661	486795282	+	Predicted protein
HORVU.MOREX.r3.5HG0530450	2.6562889088874	0.0249565384132273	5H	572241719	572247525	+	Cellulose synthase (EC 2.4.1.12)
HORVU.MOREX.r3.4HG0377890	2.66273432045651	0.0246052356944182	4H	382826191	382833315	-	Nuclear/nucleolar GTPase 2
HORVU.MOREX.r3.7HG0749360	2.6633287237448	0.0005194795283015	7H	623036580	623040102	-	Clathrin light chain
HORVU.MOREX.r3.6HG0619360	2.6741261778196	0.0014565473099391	6H	523764750	523768838	+	Predicted protein
HORVU.MOREX.r3.3HG0245400	2.68288535416458	0.0063266998938143	3H	105029113	105032934	-	Predicted protein
HORVU.MOREX.r3.6HG0582870	2.68374422864509	0.0249565384132273	6H	235903929	235904154	-	Uncharacterized protein
HORVU.MOREX.r3.2HG0193410	2.70810420522463	0.0224247561502716	2H	607137879	607139988	+	V-type proton ATPase subunit G
HORVU.MOREX.r3.7HG0678040	2.72348964657848	5.16519643729146e-05	7H	161733798	161735083	-	tricin synthase (EC 2.1.1.175)
HORVU.MOREX.r3.5HG0425010	2.72827052764155	1.12999012666812e-05	5H	10832393	10837897	-	5-methyltetrahydropteroyltriglutamate--homocysteine S-methyltransferase (EC 2.1.1.14)
HORVU.MOREX.r3.1HG0082050	2.7313734374078	4.29303978391484e-06	1H	489759809	489762628	-	Tubulin alpha chain
HORVU.MOREX.r3.2HG0201390	2.7337720794504	7.42683489861788e-07	2H	626306648	626309161	-	Adenosylhomocysteinase (EC 3.13.2.1)
HORVU.MOREX.r3.4HG0334860	2.73598794247555	0.001056661599455	4H	9814412	9818756	-	Uncharacterized protein
HORVU.MOREX.r3.2HG0157170	2.74047488056831	0.0198750017891731	2H	383317233	383318268	+	Dirigent protein
HORVU.MOREX.r3.4HG0371500	2.74163290754908	0.005322168092583	4H	320451417	320453656	+	H/ACA ribonucleoprotein complex subunit
HORVU.MOREX.r3.5HG0493070	2.75322915083612	0.0196500961605439	5H	485079657	485082076	-	peptidylprolyl isomerase (EC 5.2.1.8)
HORVU.MOREX.r3.1HG0024910	2.76156382488759	4.58080615552194e-05	1H	100324757	100325526	+	Ubiquitin-like domain-containing protein
HORVU.MOREX.r3.7HG0711840	2.76456407971268	3.960949385209481e-09	7H	474991057	474992037	+	Eukaryotic translation initiation factor 4C
HORVU.MOREX.r3.2HG0120240	2.76737005943823	7.32170798228652e-06	2H	70503836	70507035	+	Predicted protein
HORVU.MOREX.r3.4HG0387430	2.77151118090171	0.0002304908874497	4H	469618768	469622428	+	RRM domain-containing protein
HORVU.MOREX.r3.5HG0504790	2.77481153397686	0.0181758425191834	5H	513960029	513962357	-	Uncharacterized protein
HORVU.MOREX.r3.4HG0345760	2.77518800306581	0.0182142753657016	4H	63062290	63065458	+	Alcohol dehydrogenase 1 (EC 1.1.1.1)
HORVU.MOREX.r3.1HG0048030	2.78505663743739	0.0008299515934087	1H	315131189	315133758	-	Predicted protein
HORVU.MOREX.r3.7HG0656250	2.78914060740495	0.0180142100701189	7H	49242261	49243230	+	Proteasome subunit alpha type
HORVU.MOREX.r3.2HG0180820	2.8058971467133	0.0166055678170285	2H	555122624	555124540	+	Ammonium transporter
HORVU.MOREX.r3.5HG0529140	2.81065934218532	0.0034981198259044	5H	569199508	569204525	+	Tr-type G domain-containing protein
HORVU.MOREX.r3.3HG0280990	2.82170662427609	0.0162782971553533	3H	439197470	439199526	+	Predicted protein
HORVU.MOREX.r3.2HG0122600	2.82565437714428	0.0171953598725778	2H	82717859	82718732	-	Uncharacterized protein
HORVU.MOREX.r3.5HG0526250	2.84126287929107	2.23052070030959e-07	5H	563090169	563094507	+	Heat shock cognate 70 kDa protein
HORVU.MOREX.r3.1HG0069570	2.84335751879725	0.0155019195804157	1H	447789530	447792962	+	Tubulin beta chain
HORVU.MOREX.r3.4HG0344470	2.88264128699283	0.0024864877696131	4H	52823502	52825420	+	Predicted protein
HORVU.MOREX.r3.1HG0095210	2.88398404438513	0.0131956840246219	1H	515748043	515751733	-	Nucleoside diphosphate kinase (EC 2.7.4.6)
HORVU.MOREX.r3.1HG0006650	2.89834923909282	0.0151757425057884	1H	14097772	14098865	+	Histone H2A
HORVU.MOREX.r3.2HG0121700	2.90073361260556	0.0124621148906997	2H	78530088	78530869	+	NADH-ubiquinone oxidoreductase 21kDa subunit N-terminal domain-containing protein
HORVU.MOREX.r3.4HG0419280	2.9028445270533	0.0037746634129811	4H	610114852	610138648	+	Germin-like protein
HORVU.MOREX.r3.6HG0627980	2.91540207852705	0.0120519000764066	6H	548281152	548286294	-	Phosphate transporter
HORVU.MOREX.r3.4HG0337850	2.93435793491234	0.0020252212809952	4H	20111583	20114171	+	Predicted protein
HORVU.MOREX.r3.3HG0313690	2.93594916317113	8.94218018583329e-06	3H	583675360	583676811	-	glutathione transferase (EC 2.5.1.18)
HORVU.MOREX.r3.2HG0173550	2.94616186472083	0.0001506623856284	2H	513587873	513589103	-	Prohibitin
HORVU.MOREX.r3.7HG0698250	2.94676437119495	0.0123635763175454	7H	367882654	367885544	+	NADH dehydrogenase [ubiquinone] iron-sulfur protein 6, mitochondrial
HORVU.MOREX.r3.2HG0202670	2.95247154401101	1.18038845457112e-06	2H	630028185	630034499	-	Plasma membrane ATPase (EC 7.1.2.1)
HORVU.MOREX.r3.3HG0277670	2.96519325884003	0.0003055668457631	3H	412193131	412195876	-	Iron-sulfur cluster assembly protein
HORVU.MOREX.r3.2HG0112820	2.97182640389782	0.0002748611500344	2H	42028290	42030928	+	Ribosomal protein L19
HORVU.MOREX.r3.5HG0455100	2.97336724432333	0.0017399628915695	5H	236673151	236675940	-	Predicted protein
HORVU.MOREX.r3.6HG0609880	2.97831619216386	2.70586762395048e-10	6H	478210643	478213659	+	ADP/ATP translocase (ADP,ATP carrier protein)
HORVU.MOREX.r3.6HG0629350	2.98499106885672	0.0499357480540535	6H	552692892	552696839	+	Predicted protein
HORVU.MOREX.r3.3HG0275990	2.99692009220079	0.0094034776157057	3H	400025936	400029356	+	Malate dehydrogenase (EC 1.1.1.37)
HORVU.MOREX.r3.4HG0348850	3.00035180894571	0.0486444947803912	4H	88791526	88796220	+	Alkaline/neutral invertase (EC 3.2.1.26)
HORVU.MOREX.r3.6HG0623920	3.00391717204994	0.0481544514969983	6H	538612322	538616250	-	Cytosol aminopeptidase domain-containing protein
HORVU.MOREX.r3.2HG0203500	3.00840405135289	0.0494521560642216	2H	631587481	631590230	+	Uncharacterized protein
HORVU.MOREX.r3.4HG0336310	3.0151978987295	0.0470245041460928	4H	13923857	13925632	-	Predicted protein
HORVU.MOREX.r3.2HG0210680	3.01628425593631	0.0016441259724581	2H	648391392	648394257	+	Anamorsin homolog (Fe-S cluster assembly protein DRE2 homolog)
HORVU.MOREX.r3.4HG0405170	3.01765694593659	0.0469822987267952	4H	569327331	569330819	-	Proteasome subunit alpha type
HORVU.MOREX.r3.7HG0689170	3.01873549842676	0.0467988652574411	7H	249813957	249817544	-	uridine nucleosidase (EC 3.2.2.3)
HORVU.MOREX.r3.6HG0569710	3.0208633234759	0.0087089378969399	6H	120976252	120978806	-	Protein transport protein Sec61 subunit gamma
HORVU.MOREX.r3.7HG0709680	3.02559714925418	0.0476620834438223	7H	458545639	458551504	+	T-complex protein 1 subunit gamma
HORVU.MOREX.r3.1HG0080230	3.02742740763656	0.0474238732965451	1H	485708116	485708877	-	Histone H4
HORVU.MOREX.r3.5HG0465330	3.0341104778407	0.0469492100939699	5H	329888951	329893627	-	Macrophage migration inhibitory factor homolog
HORVU.MOREX.r3.5HG0420120	3.05217997089907	0.0443487389007299	5H	2230433	2232200	+	AAA+ ATPase domain-containing protein
HORVU.MOREX.r3.4HG0332160	3.05398778486279	0.007874242659872	4H	2595679	2599173	-	Ribosomal protein
HORVU.MOREX.r3.6HG0567160	3.05485118905758	0.0077691634500157	6H	106789629	106793022	+	Tubulin beta chain
HORVU.MOREX.r3.5HG0537180	3.05939235943208	0.0432412791235611	5H	584995959	585000469	-	HTH La-type RNA-binding domain-containing protein
HORVU.MOREX.r3.1HG0059770	3.05969801253983	3.35921535776118e-05	1H	397878042	397880435	-	NAC-A/B domain-containing protein
HORVU.MOREX.r3.5HG0511330	3.05995358899681	0.0432867177665093	5H	528702303	528706060	-	COBRA-like protein
HORVU.MOREX.r3.3HG0242160	3.06334812910814	0.0434311031926372	3H	83055480	83059182	+	Uncharacterized protein
HORVU.MOREX.r3.7HG0691750	3.0770085249416	0.0073749001305255	7H	280564268	280579858	-	14-3-3D
HORVU.MOREX.r3.3HG0264900	3.07728452746582	0.041886987309556	3H	296928569	296934039	+	RNA helicase (EC 3.6.4.13) (API5-interacting protein 1)
HORVU.MOREX.r3.3HG0255970	3.07839502784877	0.0074662459001716	3H	193305982	193309522	-	Predicted protein
HORVU.MOREX.r3.4HG0393930	3.08049434795058	2.07358070644602e-05	4H	515660719	515662599	+	Ubiquitin-like domain-containing protein
HORVU.MOREX.r3.1HG0087620	3.09843336041463	0.0411875663143329	1H	499643939	499645353	-	Xyloglucan endotransglucosylase/hydrolase (EC 2.4.1.207)
HORVU.MOREX.r3.4HG0385300	3.10159251224642	3.73844772446669e-07	4H	455087881	455090747	+	Elongation factor 1-alpha
HORVU.MOREX.r3.5HG0479210	3.12402246095325	0.0406979911181811	5H	424777677	424778799	-	Predicted protein
HORVU.MOREX.r3.7HG0749940	3.12543208525098	0.0075461074231456	7H	624167582	624172090	+	Delta(24)-sterol reductase (EC 1.3.1.72)
HORVU.MOREX.r3.6HG0569040	3.13890340065712	0.0001114961982488	6H	116825259	116832731	+	Predicted protein
HORVU.MOREX.r3.6HG0620330	3.1400900563893	0.0379116054777971	6H	527623845	527627927	-	Heat shock cognate 70 kDa protein
HORVU.MOREX.r3.3HG0289780	3.14090163526312	0.0372365907389053	3H	492173959	492182836	-	La-related protein 6A
HORVU.MOREX.r3.3HG0237450	3.14229394638589	0.0372075870640736	3H	51987480	51992981	+	glutamine--tRNA ligase (EC 6.1.1.18) (Glutaminyl-tRNA synthetase)
HORVU.MOREX.r3.2HG0167040	3.14804477065363	0.0372075870640736	2H	468103120	468103843	+	Predicted protein
HORVU.MOREX.r3.7HG0734860	3.14804477065363	0.0372075870640736	7H	590885151	590887891	+	Predicted protein
HORVU.MOREX.r3.1HG0073200	3.16344195408241	0.0355413274778375	1H	461485296	461488320	+	Predicted protein
HORVU.MOREX.r3.1HG0065910	3.16353025577221	0.0361000534113635	1H	431487553	431493159	-	Guanosine nucleotide diphosphate dissociation inhibitor
HORVU.MOREX.r3.4HG0348030	3.16619868739069	0.0354960606769565	4H	81417054	81417893	+	Dirigent protein
HORVU.MOREX.r3.1HG0064320	3.1678152583497	0.0353196981365657	1H	423206053	423210519	+	argininosuccinate synthase (EC 6.3.4.5) (Citrulline--aspartate ligase)
HORVU.MOREX.r3.4HG0389850	3.1746755451555	0.0372075870640736	4H	487497463	487500838	-	Predicted protein
HORVU.MOREX.r3.1HG0077250	3.175310918746	0.0352312748471072	1H	477768498	477770485	-	Cyclic phosphodiesterase
HORVU.MOREX.r3.5HG0454320	3.17824509793815	0.0356744478154588	5H	227556621	227561590	+	Predicted protein
HORVU.MOREX.r3.5HG0524420	3.18264709687872	0.0006646673399392	5H	559201304	559204106	+	ADP-ribosylation factor
HORVU.MOREX.r3.6HG0619230	3.18813362491744	0.0342588728978666	6H	523202968	523336804	+	WAT1-related protein
HORVU.MOREX.r3.2HG0187890	3.18999441456886	0.0338849653091752	2H	589295360	589297232	-	HMG box domain-containing protein
HORVU.MOREX.r3.6HG0609600	3.19849255428915	0.0336349437729722	6H	475874998	475880132	+	Uncharacterized protein
HORVU.MOREX.r3.1HG0063520	3.19964649551615	0.034053170977453	1H	418919341	418923346	-	GDSL esterase/lipase
HORVU.MOREX.r3.6HG0596580	3.20205131358496	3.51328360371594e-13	6H	378091131	378349938	-	Phenylalanine ammonia-lyase (EC 4.3.1.24)
HORVU.MOREX.r3.2HG0116210	3.20503172650108	5.0128999954793e-08	2H	53652639	53654623	-	Predicted protein
HORVU.MOREX.r3.2HG0199260	3.22203070204161	0.0327229019597906	2H	621960044	621962628	-	Glycosyltransferase 61 catalytic domain-containing protein
HORVU.MOREX.r3.5HG0442170	3.22951206948439	0.0315899923604591	5H	94424955	94430632	-	Predicted protein
HORVU.MOREX.r3.2HG0120220	3.24091628581538	0.0304404560541679	2H	70464732	70467370	-	Eukaryotic translation initiation factor 6 (eIF-6)
HORVU.MOREX.r3.4HG0338800	3.25051877227716	0.0004450652486628	4H	23742767	23745909	+	Tubulin alpha chain
HORVU.MOREX.r3.1HG0054500	3.26278580328425	0.0300133283301784	1H	364621798	364622327	-	Histone H4
HORVU.MOREX.r3.2HG0207520	3.27616790703701	0.0286752842770809	2H	641741403	641741676	+	Wound induced protein
HORVU.MOREX.r3.2HG0138300	3.29374548070618	0.027694287122195	2H	192992153	192993221	-	Histone H2A
HORVU.MOREX.r3.2HG0113380	3.30011873750642	0.0498079254608959	2H	43788869	43793266	+	Predicted protein
HORVU.MOREX.r3.3HG0311730	3.30090710671457	0.0498292138335743	3H	578446283	578449646	-	S-acyltransferase (EC 2.3.1.225) (Palmitoyltransferase)
HORVU.MOREX.r3.3HG0289150	3.30165474590667	0.0498292138335743	3H	488056146	488060537	-	3-hydroxyisobutyryl-CoA hydrolase (HIB-CoA hydrolase) (HIBYL-CoA-H) (EC 3.1.2.4) (3-hydroxyisobutyryl-coenzyme A hydrolase)
HORVU.MOREX.r3.6HG0609680	3.30488475881278	0.049376144306175	6H	477008021	477011953	-	Uncharacterized protein
HORVU.MOREX.r3.1HG0048100	3.31432599242021	0.0492395523827255	1H	316153152	316158562	+	Malic enzyme
HORVU.MOREX.r3.7HG0721250	3.31436526569542	0.0003170801222554	7H	536310272	536312594	-	NADH dehydrogenase [ubiquinone] 1 beta subcomplex subunit 9 (Complex I-B22) (NADH-ubiquinone oxidoreductase B22 subunit)
HORVU.MOREX.r3.2HG0196390	3.31528450369055	0.026076661803928	2H	615988390	615989124	-	FLZ-type domain-containing protein
HORVU.MOREX.r3.1HG0041680	3.31757718205273	0.0479736100967779	1H	266762841	266765104	+	Predicted protein
HORVU.MOREX.r3.7HG0637280	3.31757718205273	0.0479736100967779	7H	5259225	5268079	+	Alpha-dioxygenase 1
HORVU.MOREX.r3.5HG0423030	3.32014620859562	0.0257620932035586	5H	7450044	7450973	-	Thaumatin-like protein
HORVU.MOREX.r3.1HG0001120	3.32111413109957	0.0488427588329991	1H	2577002	2580483	-	Predicted protein
HORVU.MOREX.r3.7HG0733640	3.32307313181313	0.0498292138335743	7H	587459386	587461789	+	Uncharacterized protein
HORVU.MOREX.r3.1HG0076540	3.32820018835882	0.0470507018668562	1H	475141611	475151887	-	Mitochondrial-processing peptidase subunit alpha
HORVU.MOREX.r3.3HG0299540	3.33042993020471	0.0469492100939699	3H	537609057	537614178	-	Protein YIP
HORVU.MOREX.r3.5HG0484270	3.33143102357283	0.0469492100939699	5H	447397952	447399436	-	Uncharacterized protein
HORVU.MOREX.r3.1HG0023610	3.33566554469337	0.0469492100939699	1H	91259169	91259684	-	Histone H4
HORVU.MOREX.r3.6HG0558810	3.33773017615351	0.0471309829737657	6H	60754051	60754732	-	Histone H2A
HORVU.MOREX.r3.5HG0463600	3.33804471355477	0.0467988652574411	5H	317447286	317479790	-	Beta-galactosidase (EC 3.2.1.23)
HORVU.MOREX.r3.3HG0286820	3.34091944221405	0.0490237767333547	3H	473391845	473392473	-	Mitochondrial import receptor subunit TOM7-1
HORVU.MOREX.r3.1HG0027850	3.34136594034295	0.0462958629406715	1H	126045056	126051060	+	Cellulose synthase (EC 2.4.1.12)
HORVU.MOREX.r3.3HG0291870	3.34224245880357	0.0462094968009263	3H	502399382	502400840	+	Peroxidase (EC 1.11.1.7)
HORVU.MOREX.r3.5HG0423110	3.34251500670227	0.0245907269806315	5H	7614777	7615820	+	Thaumatin-like protein
HORVU.MOREX.r3.7HG0668900	3.34382256070941	3.43313805982356e-10	7H	106169411	106170223	+	SCP domain-containing protein
HORVU.MOREX.r3.4HG0386800	3.34537167650889	0.0457935430216896	4H	465310231	465313581	-	PGG domain-containing protein
HORVU.MOREX.r3.5HG0521040	3.34751657325225	9.5046718344325e-16	5H	551346370	551350421	+	Predicted protein
HORVU.MOREX.r3.1HG0078110	3.34755035606697	0.045581111415129	1H	480225815	480227108	-	Fe2OG dioxygenase domain-containing protein
HORVU.MOREX.r3.4HG0419220	3.34768659471209	0.0038301535415502	4H	610084339	610085368	+	Germin-like protein
HORVU.MOREX.r3.6HG0556730	3.35064687140857	0.045467076262027	6H	50673391	50676072	-	Cell wall hydroxyproline-rich glycoprotein
HORVU.MOREX.r3.5HG0432950	3.3575984353599	0.0471309829737657	5H	41432541	41443370	+	NADP-dependent oxidoreductase domain-containing protein
HORVU.MOREX.r3.1HG0078730	3.35865937540438	0.0242806592298274	1H	482033542	482037308	+	Signal recognition particle 54 kDa protein
HORVU.MOREX.r3.6HG0543770	3.36147786672581	0.0450295694955335	6H	13556631	13557427	+	Histone H2A
HORVU.MOREX.r3.3HG0278110	3.36217003044204	0.0451266003514218	3H	416089589	416095332	+	mitogen-activated protein kinase (EC 2.7.11.24)
HORVU.MOREX.r3.7HG0636660	3.36443953465301	0.0443487389007299	7H	4582835	4584926	+	SKP1-like protein
HORVU.MOREX.r3.1HG0025550	3.36715938512126	0.0443170090958638	1H	103824864	103830594	+	PHD finger protein ALFIN-LIKE
HORVU.MOREX.r3.2HG0114680	3.36904882811942	0.0236566707102198	2H	48515419	48519893	-	Signal recognition particle 54 kDa protein
HORVU.MOREX.r3.7HG0684530	3.37208871140024	0.0448405263247036	7H	210171349	210174860	+	Predicted protein
HORVU.MOREX.r3.7HG0643170	3.37658900890501	0.0434786320034265	7H	16136556	16141378	-	Predicted protein
HORVU.MOREX.r3.7HG0716940	3.37785414207009	0.0433958844452706	7H	505800776	505805066	-	L-ascorbate oxidase (EC 1.10.3.3)
HORVU.MOREX.r3.2HG0197680	3.38009906421849	0.0432412791235611	2H	619180281	619184731	-	Predicted protein
HORVU.MOREX.r3.4HG0334460	3.38110391166519	0.0432412791235611	4H	8926511	8931432	-	Uncharacterized protein
HORVU.MOREX.r3.5HG0490330	3.3820452339656	0.0432412791235611	5H	475975837	475977722	+	Uncharacterized protein
HORVU.MOREX.r3.1HG0086940	3.3828034379176	0.0432412791235611	1H	498533917	498537446	+	Predicted protein
HORVU.MOREX.r3.2HG0133340	3.3881095358609	1.21453303866244e-08	2H	155853506	155856463	+	Uncharacterized protein
HORVU.MOREX.r3.7HG0649550	3.38917546475492	0.0437702934290088	7H	28314205	28315023	+	Early nodulin
HORVU.MOREX.r3.6HG0588960	3.39517046779449	0.0432412791235611	6H	310497833	310503292	-	Small nuclear ribonucleoprotein Sm D1 (snRNP core protein D1)
HORVU.MOREX.r3.7HG0661890	3.39709657436462	0.0432412791235611	7H	68098932	68103406	-	3-oxoacyl-[acyl-carrier-protein] synthase
HORVU.MOREX.r3.3HG0318580	3.39761491415183	0.0432867177665093	3H	592827798	592829147	+	Uncharacterized protein
HORVU.MOREX.r3.7HG0650910	3.39934401982016	0.0420726069381368	7H	31483075	31484774	-	Predicted protein
HORVU.MOREX.r3.4HG0338620	3.39975249110758	0.0432412791235611	4H	23037464	23038388	-	Uncharacterized protein
HORVU.MOREX.r3.1HG0067500	3.40438000060305	0.0425038224199226	1H	438819767	438822513	-	Predicted protein
HORVU.MOREX.r3.3HG0263400	3.40495924068278	0.0425626650070819	3H	277534424	277539362	-	YTH domain-containing family protein
HORVU.MOREX.r3.5HG0472960	3.40758110659548	0.0020956198814004	5H	387362022	387367646	-	phosphoenolpyruvate carboxylase (EC 4.1.1.31)
HORVU.MOREX.r3.3HG0318650	3.40815373358586	0.0414920760803327	3H	592942555	592945625	-	BI1-like protein
HORVU.MOREX.r3.2HG0140090	3.40992717658406	1.59186666388111e-07	2H	205911732	205914277	+	Succinate dehydrogenase subunit 3
HORVU.MOREX.r3.6HG0544290	3.41331633981838	0.0421190200886854	6H	14467765	14470219	-	Phospholipid/glycerol acyltransferase domain-containing protein
HORVU.MOREX.r3.4HG0337220	3.41602347786454	0.0438978809286189	4H	17693097	17697106	+	Small ribosomal subunit protein mS41 SAM domain-containing protein
HORVU.MOREX.r3.7HG0677850	3.42050637788411	0.0413054505112826	7H	160202156	160203122	+	Predicted protein
HORVU.MOREX.r3.7HG0636540	3.42139056925021	0.040656839468617	7H	4423166	4425585	+	Polygalacturonase
HORVU.MOREX.r3.2HG0119860	3.42348248552685	0.0203298529514386	2H	68961327	68964092	-	10 kDa chaperonin
HORVU.MOREX.r3.2HG0157620	3.4243023466316	0.0403658337379679	2H	386879425	386882383	+	PCI domain-containing protein
HORVU.MOREX.r3.1HG0041280	3.42476188394927	0.0403658337379679	1H	262442378	262446639	+	Cellulose synthase (EC 2.4.1.12)
HORVU.MOREX.r3.5HG0500210	3.42530567824094	0.0205217580216013	5H	504051107	504055913	+	Proteasome subunit alpha type
HORVU.MOREX.r3.5HG0423060	3.42789938230771	0.0408479539525211	5H	7465747	7466666	-	Thaumatin-like protein
HORVU.MOREX.r3.7HG0731860	3.42819706915715	0.040656839468617	7H	582399864	582406166	-	Predicted protein
HORVU.MOREX.r3.3HG0233830	3.43009434962506	0.0406035787167803	3H	32922538	32926281	+	DUF1421 domain-containing protein
HORVU.MOREX.r3.3HG0324600	3.431539069964	0.0398805209088225	3H	606232917	606234536	-	PRISE-like Rossmann-fold domain-containing protein
HORVU.MOREX.r3.4HG0418600	3.43186285351637	0.0425626650070819	4H	609478184	609481591	+	arsenate reductase (glutathione/glutaredoxin) (EC 1.20.4.1)
HORVU.MOREX.r3.5HG0446870	3.43294410430415	0.0398246221400488	5H	135430849	135441182	-	Probable bifunctional methylthioribulose-1-phosphate dehydratase/enolase-phosphatase E1 [Includes: Methylthioribulose-1-phosphate dehydratase (MTRu-1-P dehydratase) (EC 4.2.1.109); Enolase-phosphatase E1 (EC 3.1.3.77) (2,3-diketo-5-methylthio-1-phosphopentane phosphatase)]
HORVU.MOREX.r3.4HG0408980	3.43579033125749	0.0398805209088225	4H	584592751	584594431	-	Methyltransferase (EC 2.1.1.-)
HORVU.MOREX.r3.3HG0253950	3.43612311697749	0.0205165607997016	3H	176118363	176119263	-	Predicted protein
HORVU.MOREX.r3.5HG0472810	3.43957531632623	0.0201344252585028	5H	386000569	386002068	-	Uncharacterized protein
HORVU.MOREX.r3.1HG0073850	3.44149364980195	0.039263047468502	1H	463905331	463911246	-	PRA1 family protein
HORVU.MOREX.r3.2HG0128630	3.44208586504322	0.039492076325622	2H	118003316	118008406	-	Predicted protein
HORVU.MOREX.r3.1HG0052810	3.44276271821961	0.0395489407725357	1H	352522768	352524613	-	Mitochondrial carnitine/acylcarnitine carrier-like protein
HORVU.MOREX.r3.3HG0289020	3.44748071983223	0.0389210719039131	3H	487518910	487522518	-	non-specific serine/threonine protein kinase (EC 2.7.11.1)
HORVU.MOREX.r3.1HG0084510	3.44786885906985	9.23035015770185e-07	1H	494418602	494422268	-	ATP synthase subunit beta (EC 7.1.2.2)
HORVU.MOREX.r3.1HG0030320	3.44995501631245	0.0386926624963349	1H	148340943	148363285	-	Peroxidase (EC 1.11.1.7)
HORVU.MOREX.r3.1HG0053650	3.44995501631245	0.0386926624963349	1H	358882528	358886777	-	PCI domain-containing protein
HORVU.MOREX.r3.1HG0029100	3.45215377809145	0.039263047468502	1H	133599022	133599839	+	Predicted protein
HORVU.MOREX.r3.5HG0529600	3.45344087372164	0.0196500961605439	5H	570610167	570612067	-	H(+)/Pi cotransporter
HORVU.MOREX.r3.5HG0494080	3.45720481425652	0.0382977213809427	5H	487355722	487358445	-	fructokinase (EC 2.7.1.4)
HORVU.MOREX.r3.4HG0354570	3.45904870611489	0.0386623226754037	4H	131517960	131519226	-	PRA1 family protein
HORVU.MOREX.r3.2HG0113270	3.46027821784195	0.0382977213809427	2H	43624122	43627277	-	HIG1 domain-containing protein
HORVU.MOREX.r3.1HG0020910	3.46170599597255	0.039263047468502	1H	75197228	75197928	+	Histone H4
HORVU.MOREX.r3.7HG0741650	3.46247233445352	0.0396635920183169	7H	608107035	608107878	-	Histone H2A
HORVU.MOREX.r3.3HG0327170	3.46304346480787	0.0401268650063538	3H	611991612	611995830	-	Predicted protein
HORVU.MOREX.r3.3HG0289860	3.46515586486493	0.0380573248091966	3H	493010761	493014629	-	DUF642 domain-containing protein
HORVU.MOREX.r3.2HG0118000	3.46555533738504	0.0377410608074109	2H	60699237	60707717	-	Predicted protein
HORVU.MOREX.r3.6HG0555700	3.46662843548036	0.0376827034490269	6H	45406809	45410371	+	Predicted protein
HORVU.MOREX.r3.4HG0411700	3.46943369726879	0.0374876916664334	4H	592302988	592309703	-	Methyltransferase (EC 2.1.1.-)
HORVU.MOREX.r3.4HG0384790	3.47103742292318	0.0182819065313453	4H	450877564	450881355	-	Asparagine synthetase [glutamine-hydrolyzing] (EC 6.3.5.4)
HORVU.MOREX.r3.2HG0203330	3.47250927815513	0.0377200431741791	2H	631342726	631349066	+	CRAL-TRIO domain-containing protein
HORVU.MOREX.r3.2HG0172460	3.47484759368747	0.0372075870640736	2H	505534751	505536010	+	Alpha/beta hydrolase fold-3 domain-containing protein
HORVU.MOREX.r3.7HG0644070	3.47726080099273	0.0372075870640736	7H	17591212	17594792	-	Uncharacterized protein 259I16.6
HORVU.MOREX.r3.5HG0529500	3.47754055807232	0.0372075870640736	5H	570442442	570447524	+	non-specific serine/threonine protein kinase (EC 2.7.11.1)
HORVU.MOREX.r3.4HG0405780	3.47892731395793	0.038571302775024	4H	572103279	572109203	+	Protein kinase domain-containing protein
HORVU.MOREX.r3.7HG0687380	3.48110638467373	0.0372075870640736	7H	235155539	235156794	-	Alpha/beta hydrolase fold-3 domain-containing protein
HORVU.MOREX.r3.1HG0069780	3.48184116918036	0.0372075870640736	1H	448755365	448759492	+	Proteasome subunit alpha type
HORVU.MOREX.r3.2HG0178420	3.48595756216282	0.0385927569841217	2H	544061306	544062173	-	Uncharacterized protein
HORVU.MOREX.r3.3HG0258370	3.48975794148141	0.0369471159332439	3H	216933417	216940652	+	ATP citrate synthase (EC 2.3.3.8)
HORVU.MOREX.r3.1HG0053360	3.49437278872663	0.0177328413690843	1H	356413725	356417131	+	NADH dehydrogenase [ubiquinone] 1 beta subcomplex subunit 10-B
HORVU.MOREX.r3.1HG0017410	3.49701512663337	0.0364597798099308	1H	55233428	55234996	-	Peroxidase (EC 1.11.1.7)
HORVU.MOREX.r3.1HG0060340	3.49818637714874	0.0366611312963853	1H	401944891	401945609	-	Histone H2B
HORVU.MOREX.r3.3HG0252240	3.49818637714874	0.0366611312963853	3H	162525559	162526240	-	Histone H2B
HORVU.MOREX.r3.3HG0284000	3.50358284549791	0.035871068113595	3H	457448424	457451110	-	Uncharacterized protein
HORVU.MOREX.r3.5HG0474780	3.50739894776592	0.0366635481070484	5H	398227390	398232029	-	Predicted protein
HORVU.MOREX.r3.4HG0333380	3.50802091121683	0.0358347268338822	4H	5505710	5509184	+	Tubulin beta chain
HORVU.MOREX.r3.5HG0534510	3.51013454300615	0.0352595061742549	5H	580046698	580048776	-	Nascent polypeptide-associated complex subunit beta
HORVU.MOREX.r3.4HG0418950	3.51065964225771	0.0389210719039131	4H	609899559	609900380	+	Germin-like protein
HORVU.MOREX.r3.7HG0636020	3.51422171307564	0.0166055678170285	7H	3843187	3846665	-	Mitochondrial pyruvate carrier
HORVU.MOREX.r3.6HG0571770	3.51623778714848	0.0165521456724728	6H	136699831	136702050	-	Glycine cleavage system H protein
HORVU.MOREX.r3.3HG0318620	3.51692951970361	0.0356744478154588	3H	592853279	592854810	-	Glucan endo-1,3-beta-glucosidase GII
HORVU.MOREX.r3.3HG0282600	3.51816430631112	0.0013626081078507	3H	449054383	449057029	-	GDSL esterase/lipase
HORVU.MOREX.r3.2HG0176990	3.51856132327224	0.0360510025877486	2H	536293731	536296089	+	Protein kinase domain-containing protein
HORVU.MOREX.r3.4HG0339820	3.51913393870839	0.0351776199926015	4H	27763045	27764820	-	Major facilitator superfamily (MFS) profile domain-containing protein
HORVU.MOREX.r3.1HG0035690	3.52112695764251	0.0352552447520263	1H	204749045	204781770	+	Ubiquitin carboxyl-terminal hydrolase (EC 3.4.19.12)
HORVU.MOREX.r3.4HG0339980	3.52420040922486	0.0345567506951538	4H	28404701	28405218	+	Uncharacterized protein
HORVU.MOREX.r3.4HG0335800	3.52779739194791	0.0013166535023132	4H	12959372	12965371	+	Lipoxygenase (EC 1.13.11.-)
HORVU.MOREX.r3.1HG0017280	3.52935778382685	0.0342505970041996	1H	53991853	53995794	+	Peroxidase (EC 1.11.1.7)
HORVU.MOREX.r3.5HG0486120	3.53103030951938	0.0173678746778881	5H	458119247	458125370	-	Predicted protein
HORVU.MOREX.r3.1HG0024040	3.53110197971625	6.64813492780402e-06	1H	94674825	94678437	-	protein disulfide-isomerase (EC 5.3.4.1)
HORVU.MOREX.r3.3HG0234800	3.53145260128773	0.01639910951332	3H	37278164	37281729	+	Predicted protein
HORVU.MOREX.r3.4HG0384040	3.53324597610494	0.0342505970041996	4H	444866311	444869921	-	S1 motif domain-containing protein
HORVU.MOREX.r3.4HG0410200	3.53324597610494	0.0342505970041996	4H	588481907	588484501	-	adenylate kinase (EC 2.7.4.3)
HORVU.MOREX.r3.7HG0710400	3.53816313276177	0.0338519160468391	7H	463526614	463528800	-	Predicted protein
HORVU.MOREX.r3.2HG0215540	3.53859528961595	0.0338295296917027	2H	658608454	658609718	-	Peroxidase (EC 1.11.1.7)
HORVU.MOREX.r3.2HG0200030	3.53975969539539	0.0348769588711459	2H	623231040	623231307	-	Wound-responsive family protein
HORVU.MOREX.r3.7HG0691910	3.54077049490746	0.0336368560051106	7H	282806081	282830512	+	Predicted protein
HORVU.MOREX.r3.7HG0736150	3.5440434314456	0.0336349437729722	7H	594995106	594997133	-	CRAL-TRIO domain-containing protein
HORVU.MOREX.r3.7HG0661480	3.54646636720642	0.0333838315872197	7H	67103148	67109755	+	Dolichyl-diphosphooligosaccharide--protein glycosyltransferase subunit 3
HORVU.MOREX.r3.1HG0087810	3.55070383144425	0.0340119472109138	1H	500044018	500045560	+	Uncharacterized protein
HORVU.MOREX.r3.5HG0447330	3.55116198925788	0.0152490250920417	5H	138747769	138749228	-	Uncharacterized protein
HORVU.MOREX.r3.2HG0116060	3.55251481725141	0.0345628055370478	2H	53112167	53114993	+	Predicted protein
HORVU.MOREX.r3.3HG0263100	3.55528781561343	0.0327229019597906	3H	273401192	273453728	+	shikimate dehydrogenase (NADP(+)) (EC 1.1.1.25)
HORVU.MOREX.r3.1HG0067070	3.5568073304602	0.016760103249121	1H	436897008	436897583	-	Predicted protein
HORVU.MOREX.r3.1HG0067090	3.56018523860014	0.0372075870640736	1H	437089473	437092541	+	Phospholipase A1 (EC 3.1.1.-)
HORVU.MOREX.r3.7HG0718930	3.5629653513539	0.0322594001104869	7H	521209380	521210922	+	Peroxidase (EC 1.11.1.7)
HORVU.MOREX.r3.4HG0335270	3.56344216061626	0.0011590234391382	4H	11193043	11196701	-	Uncharacterized protein
HORVU.MOREX.r3.7HG0730810	3.57234724072185	0.0327229019597906	7H	578971959	578972581	-	Histone H4
HORVU.MOREX.r3.6HG0539570	3.57303822811397	0.014714613069255	6H	3688158	3693136	-	Protein disulfide isomerase-like 1-4 (EC 5.3.4.1)
HORVU.MOREX.r3.2HG0153490	3.57330116491367	0.0321494897599717	2H	356990578	356992908	-	N-acetyl-D-glucosamine kinase (EC 2.7.1.59) (GlcNAc kinase)
HORVU.MOREX.r3.1HG0076600	3.57411428199279	0.0316422709865074	1H	475522449	475528581	+	ABC transporter domain-containing protein
HORVU.MOREX.r3.3HG0268100	3.57442817639908	0.0144362676518006	3H	333452839	333456613	-	Glycerophosphocholine acyltransferase 1
HORVU.MOREX.r3.1HG0024740	3.57626518648574	0.0315201774463557	1H	99429069	99435001	-	Predicted protein
HORVU.MOREX.r3.3HG0278710	3.5765773213247	0.031699952360032	3H	421183800	421184874	-	FAS1 domain-containing protein
HORVU.MOREX.r3.1HG0000070	3.57800773340734	0.014319431405656	1H	146606	148562	+	Predicted protein
HORVU.MOREX.r3.3HG0318560	3.58077027419327	0.0328402266589609	3H	592818990	592820493	+	Uncharacterized protein
HORVU.MOREX.r3.4HG0415030	3.58208398701366	0.0141940489724234	4H	600781576	600784976	+	Stem 28 kDa glycoprotein
HORVU.MOREX.r3.6HG0570470	3.58362587064171	0.0011089310538723	6H	127314456	127316546	-	Fiber protein Fb15
HORVU.MOREX.r3.7HG0649540	3.5893028495404	0.0308544901278007	7H	28277293	28278116	+	Early nodulin
HORVU.MOREX.r3.4HG0385270	3.59216976110751	0.0010227470578344	4H	454643412	454646133	-	Elongation factor 1-alpha
HORVU.MOREX.r3.2HG0132170	3.59369103844653	0.0138745812900703	2H	146410505	146413876	-	Tubulin alpha chain
HORVU.MOREX.r3.5HG0518560	3.59472163361896	0.0304579362673046	5H	546082703	546084221	-	Cell wall hydroxyproline-rich glycoprotein
HORVU.MOREX.r3.4HG0387520	3.59494072409054	7.4071852563731e-05	4H	469850246	469854190	-	UDP-glucuronate decarboxylase (EC 4.1.1.35)
HORVU.MOREX.r3.3HG0312050	3.59528584678746	0.0304539559012436	3H	579594305	579597249	-	Exostosin GT47 domain-containing protein
HORVU.MOREX.r3.2HG0185230	3.59604738200465	0.0311414295133263	2H	573550112	573553051	+	EndoU domain-containing protein
HORVU.MOREX.r3.6HG0578020	3.60087541317386	0.0311875571497492	6H	186798976	186801436	+	Predicted protein
HORVU.MOREX.r3.4HG0418910	3.60215463605872	0.0336908424134605	4H	609878587	609879408	+	Germin-like protein
HORVU.MOREX.r3.5HG0469690	3.60326364849887	0.0303277465082832	5H	361771266	361773872	-	Trafficking protein particle complex subunit
HORVU.MOREX.r3.5HG0468390	3.60389034931201	0.0301855636441822	5H	351832537	351838219	-	CUE domain-containing protein
HORVU.MOREX.r3.4HG0333740	3.60618080712725	0.0304404560541679	4H	6363217	6366576	+	Predicted protein
HORVU.MOREX.r3.2HG0213430	3.60865796396617	0.0298917292103389	2H	654181744	654183187	+	Predicted protein
HORVU.MOREX.r3.4HG0334820	3.60976274131631	0.0298148287159433	4H	9731903	9736003	+	Predicted protein
HORVU.MOREX.r3.1HG0071630	3.61282110581535	0.0300133283301784	1H	455700261	455701383	-	PRA1 family protein
HORVU.MOREX.r3.5HG0420680	3.61282110581535	0.0300133283301784	5H	3634652	3636580	+	E3 ubiquitin-protein ligase RMA (EC 2.3.2.27) (Protein RING membrane-anchor) (RING-type E3 ubiquitin transferase RMA)
HORVU.MOREX.r3.1HG0004280	3.61375925753648	0.0297889551749973	1H	9112594	9116319	+	Chymotrypsin inhibitor-2
HORVU.MOREX.r3.1HG0003090	3.61530966956349	0.0305698197665197	1H	5944994	5974567	+	Acidic protein
HORVU.MOREX.r3.2HG0196250	3.61992586699571	0.0292972212288852	2H	615302291	615303343	-	RING-type E3 ubiquitin transferase (EC 2.3.2.27)
HORVU.MOREX.r3.3HG0289290	3.62210259922023	5.45839726647249e-05	3H	488626716	488628921	+	ATP synthase subunit epsilon, mitochondrial
HORVU.MOREX.r3.2HG0112600	3.62244126107935	0.0292402035997737	2H	41448576	41450172	+	Peroxidase (EC 1.11.1.7)
HORVU.MOREX.r3.5HG0444960	3.62587802927698	0.0295570555923181	5H	117164794	117168425	-	Uncharacterized protein
HORVU.MOREX.r3.5HG0492970	3.62651272855172	0.0295184591406504	5H	484801617	484802636	+	DOMON domain-containing protein
HORVU.MOREX.r3.5HG0521940	3.62785592840903	9.16612931968313e-10	5H	553112985	553113180	-	Secreted protein
HORVU.MOREX.r3.7HG0738340	3.6286800379127	0.0288312516317477	7H	599608662	599611154	+	Haloacid dehalogenase-like hydrolase domain-containing protein 3
HORVU.MOREX.r3.5HG0442670	3.63409919759828	0.0124607817742614	5H	97926458	97930589	+	ATP citrate synthase (EC 2.3.3.8)
HORVU.MOREX.r3.1HG0055830	3.63535404001424	0.0288312516317477	1H	372302906	372307939	+	Branched-chain-amino-acid aminotransferase (EC 2.6.1.42)
HORVU.MOREX.r3.4HG0338790	3.63650043119958	0.02853441380319	4H	23524692	23530815	-	Predicted protein
HORVU.MOREX.r3.6HG0628410	3.63844142513869	0.0285681009171045	6H	549900021	549901047	+	Germin-like protein
HORVU.MOREX.r3.5HG0509760	3.6402119668225	0.0122677102054179	5H	524804342	524806935	-	Auxin-responsive protein
HORVU.MOREX.r3.4HG0378950	3.64221141890793	0.0281527554762179	4H	396704574	396710161	-	Eukaryotic translation initiation factor 2 subunit beta
HORVU.MOREX.r3.3HG0302910	3.64289334185971	0.0295987174532466	3H	551121925	551122655	+	Histone H2B
HORVU.MOREX.r3.5HG0433440	3.6491437976762	0.0125331822898546	5H	44352923	44354166	-	Auxin-responsive protein
HORVU.MOREX.r3.2HG0106140	3.64984961823613	0.0298148287159433	2H	22903896	22905941	+	plant cystathionine gamma-synthase (EC 2.5.1.160)
HORVU.MOREX.r3.7HG0737470	3.65157675892647	0.0276645872874736	7H	597694124	597695734	-	Peroxidase (EC 1.11.1.7)
HORVU.MOREX.r3.4HG0401530	3.65287713040788	0.011796755512561	4H	556146136	556150747	-	YTH domain-containing family protein
HORVU.MOREX.r3.6HG0580320	3.65293660852314	0.0279895599587357	6H	209198439	209202574	+	Predicted protein
HORVU.MOREX.r3.2HG0186560	3.65482967151662	0.0279276944197057	2H	582772350	582775999	-	Rho-GAP domain-containing protein
HORVU.MOREX.r3.1HG0089180	3.65633080438349	0.0120462370859162	1H	502624016	502626375	-	Cold acclimation WCOR413-like protein gamma form (Predicted protein)
HORVU.MOREX.r3.7HG0720200	3.66325191834399	0.0271457008402011	7H	529699916	529704580	+	AAA+ ATPase domain-containing protein
HORVU.MOREX.r3.3HG0290880	3.66379941095087	0.0114562275747925	3H	497986641	497988501	-	UDP-arabinopyranose mutase (EC 5.4.99.30)
HORVU.MOREX.r3.6HG0630670	3.66417844288723	0.0008968302420415	6H	555567194	555570503	+	Fibrillarin
HORVU.MOREX.r3.6HG0586970	3.66450534150815	0.0271470260574647	6H	288024332	288031826	-	RRM domain-containing protein
HORVU.MOREX.r3.5HG0505150	3.66852443256094	0.0275413655954438	5H	514713108	514714962	+	Predicted protein
HORVU.MOREX.r3.2HG0099170	3.66884904935506	0.0268501054817398	2H	9417993	9419568	-	NADH:flavin oxidoreductase/NADH oxidase N-terminal domain-containing protein
HORVU.MOREX.r3.4HG0407950	3.67385709090949	0.0266789014306499	4H	580899655	580900317	-	Predicted protein
HORVU.MOREX.r3.2HG0104520	3.67435404537385	0.0265535332718014	2H	17967307	17979879	+	Chloroplast acetyl-CoA carboxylase
HORVU.MOREX.r3.2HG0192880	3.67940697035996	0.0279895599587357	2H	606210120	606229908	-	Uncharacterized protein
HORVU.MOREX.r3.7HG0705190	3.68264449271555	0.0109716332575226	7H	430228689	430231040	+	fructokinase (EC 2.7.1.4)
HORVU.MOREX.r3.1HG0055270	3.69579527121154	0.0270178159831383	1H	368936331	368938308	+	Uncharacterized protein
HORVU.MOREX.r3.1HG0087270	3.69600801347127	0.0271457008402011	1H	499132588	499133605	-	Predicted protein
HORVU.MOREX.r3.4HG0383820	3.69683930941987	0.0256530320967833	4H	442972885	442973979	+	Uncharacterized protein
HORVU.MOREX.r3.5HG0430880	3.69852417012891	0.0257474732647532	5H	30500679	30503818	-	Uncharacterized protein
HORVU.MOREX.r3.3HG0310680	3.7025280467861	0.0269576194802066	3H	574503974	574508982	+	Mitochondrial import receptor subunit TOM20
HORVU.MOREX.r3.1HG0093060	3.70356108375269	0.0253167864371789	1H	510469265	510473937	+	Probable zinc-ribbon domain-containing protein
HORVU.MOREX.r3.4HG0417900	3.70684025609355	0.000674237099096	4H	607643135	607646186	+	Nascent polypeptide-associated complex subunit beta
HORVU.MOREX.r3.3HG0240670	3.70778675710973	0.0249565384132273	3H	73215039	73215593	+	Histone H4
HORVU.MOREX.r3.7HG0738530	3.71734839617818	0.024734882003586	7H	600190501	600191080	-	Bifunctional inhibitor/plant lipid transfer protein/seed storage helical domain-containing protein
HORVU.MOREX.r3.1HG0039110	3.71742108602725	0.0248129405574216	1H	245846975	245860099	+	Macro domain-containing protein
HORVU.MOREX.r3.1HG0073250	3.71759942329124	0.0245907269806315	1H	461579174	461582240	+	Coatomer subunit zeta
HORVU.MOREX.r3.3HG0235910	3.71793911937341	0.0248275055881613	3H	40271380	40272401	+	FAS1 domain-containing protein
HORVU.MOREX.r3.3HG0255020	3.71890079113167	0.0272066905437163	3H	184621309	184623220	+	Peroxidase (EC 1.11.1.7)
HORVU.MOREX.r3.2HG0182400	3.72044979341353	0.0100889855001103	2H	561856197	561858339	+	Uncharacterized protein
HORVU.MOREX.r3.4HG0413710	3.72076855530511	0.0245907269806315	4H	597633252	597638121	-	F-box domain-containing protein
HORVU.MOREX.r3.4HG0367110	3.72176626369538	0.0245907269806315	4H	257378662	257384867	-	plant cystathionine gamma-synthase (EC 2.5.1.160)
HORVU.MOREX.r3.5HG0438450	3.72176626369538	0.0245907269806315	5H	65554449	65561097	+	adenine phosphoribosyltransferase (EC 2.4.2.7)
HORVU.MOREX.r3.2HG0100670	3.72235999088392	0.0245907269806315	2H	11990784	11993789	+	Eukaryotic translation initiation factor 3 subunit M (eIF3m)
HORVU.MOREX.r3.2HG0137420	3.72293114973689	0.0245907269806315	2H	186480868	186483471	-	Predicted protein
HORVU.MOREX.r3.2HG0176670	3.72586201373516	0.0248129405574216	2H	533988162	533991023	+	26S proteasome regulatory subunit RPN7
HORVU.MOREX.r3.7HG0638160	3.72734384230733	0.0245797990929622	7H	6871270	6875195	-	RRM domain-containing protein
HORVU.MOREX.r3.3HG0273620	3.73364923857309	0.0249627825078684	3H	382752552	382764884	+	Beta-adaptin-like protein
HORVU.MOREX.r3.7HG0738440	3.73692429406381	0.024278870068114	7H	599984350	599984975	-	Bifunctional inhibitor/plant lipid transfer protein/seed storage helical domain-containing protein
HORVU.MOREX.r3.6HG0543800	3.73878042689699	0.0245907269806315	6H	13629530	13630355	-	Histone H2A
HORVU.MOREX.r3.7HG0662650	3.74273812524728	0.0235769614277465	7H	70686122	70686769	-	Histone H3
HORVU.MOREX.r3.7HG0685210	3.74351789556217	0.0240067255944894	7H	214391936	214396259	-	Ubiquitin thioesterase (EC 3.4.19.12)
HORVU.MOREX.r3.5HG0520930	3.74737904847778	0.0235498728706632	5H	551090233	551096606	+	Chloride channel protein
HORVU.MOREX.r3.5HG0475360	3.75069700599629	7.13593012218936e-08	5H	401840524	401843897	+	Uncharacterized protein
HORVU.MOREX.r3.6HG0554680	3.75326377515109	0.0092700071343958	6H	41076841	41081974	+	Heme O synthase
HORVU.MOREX.r3.4HG0415490	3.7534730768062	0.0230878198818364	4H	602228318	602229180	+	Bifunctional inhibitor/plant lipid transfer protein/seed storage helical domain-containing protein
HORVU.MOREX.r3.5HG0518960	3.75376688312334	0.0232740566039913	5H	547252186	547255438	+	Predicted protein
HORVU.MOREX.r3.5HG0490320	3.75785605663145	0.0239001860392973	5H	475834645	475836291	-	Eukaryotic translation initiation factor 3 subunit E (eIF3e) (Eukaryotic translation initiation factor 3 subunit 6)
HORVU.MOREX.r3.1HG0027090	3.75816090236022	0.0240067255944894	1H	119199676	119204005	+	Predicted protein
HORVU.MOREX.r3.2HG0208280	3.76724873307322	0.0228686995172702	2H	643191970	643193164	+	Sulfotransferase (EC 2.8.2.-)
HORVU.MOREX.r3.1HG0021330	3.76812033884438	0.0228890188407921	1H	77792228	77796400	+	asparagine--tRNA ligase (EC 6.1.1.22)
HORVU.MOREX.r3.3HG0295330	3.77007478771531	0.0233506542317241	3H	519013924	519015639	-	Sugar phosphate transporter domain-containing protein
HORVU.MOREX.r3.2HG0186680	3.77087923982452	0.0236938442139179	2H	583287958	583288992	-	H15 domain-containing protein
HORVU.MOREX.r3.2HG0201770	3.77440447866699	0.0228096500483624	2H	627291753	627293748	+	U3 small nucleolar ribonucleoprotein protein IMP3 (30S ribosomal protein S4, chloroplastic) (U3 small nucleolar ribonucleoprotein protein imp3)
HORVU.MOREX.r3.6HG0541580	3.77485431011235	0.0227520838707611	6H	8563466	8567919	-	Aspartate aminotransferase (EC 2.6.1.1)
HORVU.MOREX.r3.1HG0036930	3.77978195912931	0.0222945046489714	1H	220646472	220648203	+	Histone H2A
HORVU.MOREX.r3.2HG0195580	3.78454924505399	0.0218909676543393	2H	613235401	613239267	-	NAD(P)-binding domain-containing protein
HORVU.MOREX.r3.3HG0248280	3.78506686939304	0.021914379917684	3H	129256024	129258667	+	Reticulon-like protein
HORVU.MOREX.r3.6HG0623620	3.78731958778599	0.0215828995522228	6H	536902938	536903804	+	Cytochrome b5 heme-binding domain-containing protein
HORVU.MOREX.r3.3HG0320230	3.79028459745082	0.021613410489474	3H	596955766	596956773	+	glutathione transferase (EC 2.5.1.18)
HORVU.MOREX.r3.4HG0333550	3.79040349395677	0.0215828995522228	4H	5880159	5883761	-	Predicted protein
HORVU.MOREX.r3.2HG0114930	3.79563252688022	0.0006828720413225	2H	49019789	49023604	-	Nucleolar protein 58
HORVU.MOREX.r3.3HG0228790	3.79752667971233	0.0214840482672177	3H	20107997	20111450	+	Mitochondrial glycoprotein
HORVU.MOREX.r3.2HG0215550	3.79962302247951	0.0218106057344339	2H	658658198	658659434	+	Peroxidase (EC 1.11.1.7)
HORVU.MOREX.r3.2HG0203510	3.80194713440276	0.0080021611708714	2H	631590953	631595924	-	Protein TIFY (Jasmonate ZIM domain-containing protein)
HORVU.MOREX.r3.6HG0628850	3.80439473654025	0.0004188787198753	6H	550931877	550933383	+	Ribosomal protein L37
HORVU.MOREX.r3.5HG0465890	3.81156412432425	0.0224438831791422	5H	333372032	333375401	+	Asparagine synthetase [glutamine-hydrolyzing] (EC 6.3.5.4)
HORVU.MOREX.r3.7HG0688720	3.81302500712254	0.0206433642380186	7H	246565598	246567301	+	NADH dehydrogenase [ubiquinone] iron-sulfur protein 5 (Complex I-15 kDa) (NADH-ubiquinone oxidoreductase 15 kDa subunit)
HORVU.MOREX.r3.6HG0552970	3.81637114885843	0.0208362954590423	6H	34991300	34991749	-	NADH dehydrogenase [ubiquinone] 1 beta subcomplex subunit 3-B
HORVU.MOREX.r3.6HG0610500	3.82071492761113	0.0203157683079709	6H	481558717	481563759	-	Peptidase A1 domain-containing protein
HORVU.MOREX.r3.1HG0034330	3.82282376898336	0.0201961262450032	1H	186784832	186808944	-	procollagen-proline 4-dioxygenase (EC 1.14.11.2)
HORVU.MOREX.r3.2HG0124560	3.82282376898336	0.0201961262450032	2H	95787677	95790223	-	Predicted protein
HORVU.MOREX.r3.2HG0165860	3.82687777522052	0.0003570082266907	2H	458568036	458570233	+	ATP synthase subunit d, mitochondrial
HORVU.MOREX.r3.3HG0284120	3.82946984740955	0.0206824557925289	3H	458249566	458257618	+	Histone-binding protein RBBP4-like N-terminal domain-containing protein
HORVU.MOREX.r3.5HG0524690	3.83170215743088	0.0198586992680686	5H	559721721	559724786	-	Transcription elongation factor
HORVU.MOREX.r3.5HG0497530	3.83241638454831	0.0201344252585028	5H	495010167	495011297	+	C-repeat binding factor 9 (CBF9) (CRT/DRE binding factor 9)
HORVU.MOREX.r3.3HG0307490	3.83291775742654	0.0073944046450971	3H	564864758	564866328	-	Acyl-[acyl-carrier-protein] desaturase
HORVU.MOREX.r3.1HG0052220	3.83702479815323	0.0074281367338576	1H	347981186	348000255	+	Non-lysosomal glucosylceramidase (NLGase) (EC 3.2.1.45)
HORVU.MOREX.r3.1HG0027490	3.8500880559859	0.0192164241421477	1H	122985176	122985976	+	Predicted protein
HORVU.MOREX.r3.2HG0189670	3.85409694446048	0.0194028226327932	2H	596172198	596173384	+	Tonoplast intrinsic protein
HORVU.MOREX.r3.6HG0619260	3.85518505626858	0.0198063369507788	6H	523436350	523439179	+	GOLD domain-containing protein
HORVU.MOREX.r3.6HG0548480	3.85943174736	0.0203157683079709	6H	21913752	21914595	+	Histone H2A
HORVU.MOREX.r3.3HG0236100	3.86282869145659	0.0192937997983828	3H	41894904	41896453	+	Late embryogenesis abundant protein LEA-2 subgroup domain-containing protein
HORVU.MOREX.r3.3HG0309270	3.86332627762002	0.0189109105320768	3H	569805712	569813401	+	proline--tRNA ligase (EC 6.1.1.15) (Prolyl-tRNA synthetase)
HORVU.MOREX.r3.1HG0050090	3.86453846644579	0.0187247908913539	1H	333666250	333669077	-	Predicted protein
HORVU.MOREX.r3.5HG0513830	3.86486685056154	0.0066820160102041	5H	535904523	535907435	+	Tubulin alpha chain
HORVU.MOREX.r3.5HG0433470	3.86556241105225	0.0192164241421477	5H	44643410	44647049	+	Auxin-responsive protein
HORVU.MOREX.r3.6HG0568900	3.86747645240092	0.0189138438524742	6H	115661435	115662119	-	Histone H3
HORVU.MOREX.r3.7HG0735200	3.86832644649621	0.0003248019622702	7H	591920730	591925640	+	Uncharacterized protein
HORVU.MOREX.r3.3HG0254430	3.87276270574647	0.0183479988987191	3H	180649258	180652423	+	Uncharacterized protein
HORVU.MOREX.r3.1HG0000950	3.88201458364528	0.0063736762005823	1H	2262515	2269336	-	Mannan endo-1,4-beta-mannosidase
HORVU.MOREX.r3.4HG0339730	3.89120432991391	0.0177328413690843	4H	27054034	27057938	-	Peptidase C1A papain C-terminal domain-containing protein
HORVU.MOREX.r3.1HG0060770	3.89594493101553	0.0180142100701189	1H	403881401	403882489	-	AP2/EREBP-like protein
HORVU.MOREX.r3.6HG0549380	3.8981872821149	0.0061272744292312	6H	24459669	24462789	+	Gamma-glutamylcyclotransferase
HORVU.MOREX.r3.5HG0507940	3.8983216378328	0.0060549756791651	5H	520369865	520373657	-	Uncharacterized protein
HORVU.MOREX.r3.7HG0739490	3.90087589090181	0.0173678746778881	7H	602326990	602327700	-	Histone H2B
HORVU.MOREX.r3.2HG0139260	3.90384257203765	0.0197740278721771	2H	201405596	201412243	-	NUC153 domain-containing protein
HORVU.MOREX.r3.5HG0478050	3.90749894351372	0.0060385935125149	5H	416344645	416348883	+	Nucleobase-ascorbate transporter 6
HORVU.MOREX.r3.2HG0124810	3.90826065877617	0.0058937817131525	2H	96880946	96886572	+	Alanine aminotransferase 2 (EC 2.6.1.2)
HORVU.MOREX.r3.7HG0738430	3.91029709158469	0.0173678746778881	7H	599947630	599948332	-	Bifunctional inhibitor/plant lipid transfer protein/seed storage helical domain-containing protein
HORVU.MOREX.r3.1HG0095230	3.91177919584436	0.0173678746778881	1H	515756636	515760620	-	CCT domain-containing protein
HORVU.MOREX.r3.7HG0739480	3.91255408442954	0.017426785797043	7H	602316451	602317076	-	Histone H2B
HORVU.MOREX.r3.3HG0291910	3.91987514231412	0.0167482875377619	3H	502650507	502651942	+	Peroxidase (EC 1.11.1.7)
HORVU.MOREX.r3.5HG0474900	3.92463313679846	0.0173678746778881	5H	399034759	399038910	-	Protein arginine N-methyltransferase 1 (EC 2.1.1.319)
HORVU.MOREX.r3.5HG0509180	3.92497202233003	0.0166573204305532	5H	523346701	523349702	+	Prefoldin subunit 4
HORVU.MOREX.r3.7HG0717720	3.92497202233003	0.0166573204305532	7H	512182952	512188756	-	T-complex protein 1 subunit epsilon (CCT-epsilon)
HORVU.MOREX.r3.7HG0732460	3.92924605724904	1.6169080714957998e-17	7H	584342381	584343152	+	Predicted protein
HORVU.MOREX.r3.7HG0650970	3.93765075399933	0.0164574790796669	7H	31639288	31639928	+	Histone H3
HORVU.MOREX.r3.3HG0241540	3.93852704788817	0.0166017408011433	3H	79498065	79500595	+	Predicted protein
HORVU.MOREX.r3.5HG0508050	3.95403290332422	0.0053112152303633	5H	520568035	520572383	+	Nuclear transcription factor Y subunit
HORVU.MOREX.r3.6HG0595580	3.95691097159983	0.0156853095624527	6H	370798922	370800767	+	Ammonium transporter
HORVU.MOREX.r3.6HG0574510	3.96426918850888	0.0156076914115602	6H	158651548	158657450	+	glucomannan 4-beta-mannosyltransferase (EC 2.4.1.32)
HORVU.MOREX.r3.7HG0688870	3.96866502995233	0.0153409545890151	7H	247501429	247504350	-	monodehydroascorbate reductase (NADH) (EC 1.6.5.4)
HORVU.MOREX.r3.6HG0560710	3.97010101041278	0.0155019195804157	6H	70799246	70804225	-	Fibronectin type-III domain-containing protein
HORVU.MOREX.r3.6HG0572880	3.97068755159982	0.0152490250920417	6H	144770951	144777264	+	Predicted protein
HORVU.MOREX.r3.2HG0142850	3.9728370014435	0.0152490250920417	2H	230254612	230270348	+	Uncharacterized protein
HORVU.MOREX.r3.6HG0603820	3.97621182880454	0.0154946538904759	6H	440439976	440444079	+	RmlD-like substrate binding domain-containing protein
HORVU.MOREX.r3.4HG0338160	3.98105157792243	0.014919681191033	4H	21406328	21430663	+	TOG domain-containing protein
HORVU.MOREX.r3.5HG0511610	3.98703588767911	0.0147960561294357	5H	529230722	529234167	+	Predicted protein
HORVU.MOREX.r3.2HG0173120	3.9880721141214	0.0147960561294357	2H	509462126	509465054	+	Aldose 1-epimerase (EC 5.1.3.3)
HORVU.MOREX.r3.4HG0400070	3.99130138210335	0.014919681191033	4H	550631071	550634939	-	PCI domain-containing protein
HORVU.MOREX.r3.7HG0718830	3.99833454066743	0.0144362676518006	7H	520570018	520571834	+	Predicted protein
HORVU.MOREX.r3.6HG0614350	4.00243849716463	0.0044314489641303	6H	499887382	499888530	-	Predicted protein
HORVU.MOREX.r3.2HG0197710	4.00294612003663	0.0167737143823365	2H	619229947	619230574	-	Histone H4
HORVU.MOREX.r3.5HG0508190	4.01141604857827	0.0144319419220421	5H	521109588	521113104	+	pyruvate dehydrogenase (acetyl-transferring) (EC 1.2.4.1)
HORVU.MOREX.r3.2HG0127050	4.01164670649544	0.0145124640389802	2H	109573405	109574199	+	Predicted protein
HORVU.MOREX.r3.7HG0642360	4.01219660516729	0.0141197118136848	7H	14813487	14815418	-	BAG domain-containing protein
HORVU.MOREX.r3.1HG0060300	4.01661906882017	0.014319431405656	1H	401891314	401894607	-	Nucleolar protein 16
HORVU.MOREX.r3.2HG0153420	4.02444001976965	0.0142885518472345	2H	356220111	356246983	-	Ig-like domain-containing protein
HORVU.MOREX.r3.4HG0392820	4.02538921571189	0.0137264596093499	4H	508608538	508610129	+	Uncharacterized protein
HORVU.MOREX.r3.7HG0739460	4.02726074690888	0.0141197118136848	7H	602303623	602304270	-	Histone H2B
HORVU.MOREX.r3.6HG0592050	4.03043452016346	9.88474304153471e-14	6H	338753657	338756688	+	Glyceraldehyde-3-phosphate dehydrogenase (EC 1.2.1.-)
HORVU.MOREX.r3.3HG0256380	4.03500064679594	0.0136121084000119	3H	197160214	197161248	-	E2 ubiquitin-conjugating enzyme (EC 2.3.2.23)
HORVU.MOREX.r3.3HG0245890	4.04097997432499	0.0132280763487735	3H	109121162	109125764	-	Predicted protein
HORVU.MOREX.r3.4HG0335150	4.04375146331618	0.0131512934390335	4H	10877686	10885077	-	Ribonuclease
HORVU.MOREX.r3.3HG0255430	4.04607951362735	0.0131193836801137	3H	188332089	188332613	-	Secreted protein
HORVU.MOREX.r3.6HG0622540	4.05754254737557	0.013421566388328	6H	533897490	533899366	+	Equilibrative nucleotide transporter 1
HORVU.MOREX.r3.2HG0200980	4.05969149821463	0.0128998143491612	2H	625293785	625296643	+	Peptidyl-prolyl cis-trans isomerase (EC 5.2.1.8)
HORVU.MOREX.r3.1HG0075570	4.06053370304697	0.0126676091875364	1H	472681241	472685848	-	Bifunctional aspartate aminotransferase and glutamate/aspartate-prephenate aminotransferase
HORVU.MOREX.r3.5HG0508860	4.06919049194978	0.0124621148906997	5H	522595183	522600427	-	Major facilitator superfamily (MFS) profile domain-containing protein
HORVU.MOREX.r3.2HG0131330	4.07091751369285	0.0037746634129811	2H	140284687	140287920	+	Sugar phosphate transporter domain-containing protein
HORVU.MOREX.r3.3HG0295580	4.07690112006284	0.0035389459943522	3H	520491421	520494689	+	Tubulin beta chain
HORVU.MOREX.r3.3HG0236020	4.08456278750193	0.0121666248552097	3H	41129302	41129961	-	Predicted protein
HORVU.MOREX.r3.3HG0330200	4.09776424535654	1.9387355920419903e-09	3H	618265888	618267204	-	Predicted protein (Tonoplast intrinsic protein)
HORVU.MOREX.r3.1HG0040610	4.10116045274964	0.012427942283999	1H	256688375	256698686	+	Predicted protein
HORVU.MOREX.r3.2HG0119120	4.10385158287112	0.0119041900873358	2H	66063615	66065795	+	GPI-anchored protein
HORVU.MOREX.r3.7HG0681180	4.10882422126526	0.0114947252927432	7H	184896903	184897952	+	Predicted protein
HORVU.MOREX.r3.3HG0295400	4.110832421084	0.0114491042789385	3H	519451036	519453136	-	WAT1-related protein
HORVU.MOREX.r3.3HG0225930	4.12025912662754	0.0113348780013314	3H	14058913	14064187	+	aldehyde oxygenase (deformylating) (EC 4.1.99.5)
HORVU.MOREX.r3.4HG0337500	4.12213306759011	0.0114491042789385	4H	18916344	18921317	-	NADH dehydrogenase [ubiquinone] iron-sulfur protein 1, mitochondrial
HORVU.MOREX.r3.3HG0303270	4.12285450587424	0.0112119114755477	3H	552188508	552189324	+	Signal peptidase complex subunit 1
HORVU.MOREX.r3.1HG0080780	4.12356464843157	0.0115867565572488	1H	486921367	486922028	+	Histone H3
HORVU.MOREX.r3.5HG0497970	4.12984806265329	0.0112517534271924	5H	497085552	497086516	+	AP2/ERF domain-containing protein
HORVU.MOREX.r3.1HG0023620	4.1390378572261	0.0109227663408494	1H	91262497	91263243	-	Histone H3
HORVU.MOREX.r3.2HG0100250	4.14380682549544	0.0108258168137942	2H	11229055	11230525	+	Stress-response A/B barrel domain-containing protein
HORVU.MOREX.r3.2HG0100890	4.14581487059956	0.0107336524770578	2H	12211594	12216320	-	Phosphoglycerate mutase-like protein 1
HORVU.MOREX.r3.7HG0707700	4.14598759423903	0.0107281076695574	7H	444375595	444377067	+	Predicted protein
HORVU.MOREX.r3.1HG0074000	4.15184924947225	0.0107281076695574	1H	465108437	465110794	-	UspA domain-containing protein
HORVU.MOREX.r3.7HG0654410	4.15302129370542	0.0105806768697663	7H	43546953	43547605	-	Histone H3
HORVU.MOREX.r3.2HG0195510	4.15503110245711	0.0105806768697663	2H	613116807	613117363	-	Uncharacterized protein
HORVU.MOREX.r3.5HG0485920	4.15864773912831	0.0107281076695574	5H	457548015	457548693	-	Predicted protein
HORVU.MOREX.r3.1HG0059370	4.1597579396294	0.0105043200499775	1H	395556642	395559355	+	Signal peptidase complex catalytic subunit SEC11 (EC 3.4.21.89) (Signal peptidase complex catalytic subunit sec11)
HORVU.MOREX.r3.5HG0447780	4.16914641498952	0.0103160468150145	5H	142786874	142793633	+	1-acylglycerol-3-phosphate O-acyltransferase (EC 2.3.1.51)
HORVU.MOREX.r3.1HG0081100	4.17297449703237	0.0105389634909096	1H	487806782	487810011	+	Uncharacterized protein
HORVU.MOREX.r3.4HG0398910	4.17671361479766	0.0103639592257082	4H	545082226	545082916	+	Histone H2B
HORVU.MOREX.r3.3HG0306200	4.18132605814566	0.0100048360022788	3H	561294325	561297031	+	fructokinase (EC 2.7.1.4)
HORVU.MOREX.r3.2HG0195190	4.18182336695924	0.0103594204721781	2H	612098526	612099694	-	Uncharacterized protein
HORVU.MOREX.r3.5HG0517120	4.18684800123937	0.0099255405625579	5H	542877122	542879314	+	MD-2-related lipid-recognition domain-containing protein
HORVU.MOREX.r3.3HG0254940	4.18841521102405	0.0107336524770578	3H	184166690	184168459	-	Peroxidase (EC 1.11.1.7)
HORVU.MOREX.r3.2HG0207400	4.18974837519281	0.0098077745740598	2H	641468427	641472463	+	N-acetyltransferase domain-containing protein
HORVU.MOREX.r3.5HG0491740	4.19077547716624	0.0024009120216901	5H	481405558	481407577	+	chitinase (EC 3.2.1.14)
HORVU.MOREX.r3.3HG0328170	4.19497427562856	0.0023896170495372	3H	614261429	614262155	+	SCP domain-containing protein
HORVU.MOREX.r3.1HG0022660	4.19692372224806	0.0099620988108096	1H	85373219	85375911	+	Predicted protein
HORVU.MOREX.r3.5HG0502760	4.1999585649888	5.29200124376559e-06	5H	510178355	510178863	+	Histone H4
HORVU.MOREX.r3.5HG0509090	4.20241655453113	0.0095791320550106	5H	523146423	523147952	-	Auxin-responsive protein
HORVU.MOREX.r3.3HG0293700	4.2052159783195	0.0106974010148454	3H	511076379	511085610	+	Predicted protein
HORVU.MOREX.r3.7HG0654460	4.21252610256112	0.0093631746893575	7H	43730100	43730765	+	Histone H3
HORVU.MOREX.r3.7HG0739380	4.2207763489994	0.0094667058259681	7H	602188601	602189242	+	Histone H2B
HORVU.MOREX.r3.3HG0300700	4.2236353500724	4.94951818222479e-05	3H	541696805	541700027	-	Ribosomal protein
HORVU.MOREX.r3.5HG0499480	4.22540352037115	0.009432188739466	5H	502203241	502207311	+	ER lumen protein-retaining receptor
HORVU.MOREX.r3.2HG0190220	4.22600445197683	0.0091148160786301	2H	597893185	597893717	+	Histone H4
HORVU.MOREX.r3.1HG0082960	4.22997328214494	0.0094037355281207	1H	491119548	491122035	-	alcohol dehydrogenase (EC 1.1.1.1)
HORVU.MOREX.r3.1HG0056570	4.23471771651516	0.008915380421272	1H	378086355	378087902	-	Predicted protein
HORVU.MOREX.r3.2HG0159340	4.23482419114435	0.0092832044003242	2H	407028755	407037946	+	Predicted protein
HORVU.MOREX.r3.1HG0070630	4.23503340243588	9.41657132224225e-07	1H	451745203	451748776	-	NADH dehydrogenase [ubiquinone] 1 alpha subcomplex subunit 1
HORVU.MOREX.r3.5HG0534140	4.23598491025131	0.008982737754817	5H	579502292	579503427	-	Uncharacterized protein
HORVU.MOREX.r3.3HG0231050	4.23894323321331	0.0093631746893575	3H	25147232	25147851	-	Histone H2B
HORVU.MOREX.r3.7HG0651300	4.24241476252736	0.0092744475626261	7H	32269431	32270156	-	SCP domain-containing protein
HORVU.MOREX.r3.4HG0387150	4.25132268538887	0.0085961420398752	4H	467564990	467565573	+	Histone H2A
HORVU.MOREX.r3.7HG0655760	4.2599165456556	0.0089603260823876	7H	47460643	47460895	-	Uncharacterized protein
HORVU.MOREX.r3.6HG0620090	4.26022477367471	0.0095657351633085	6H	526609450	526611446	-	Growth-regulating factor
HORVU.MOREX.r3.4HG0414480	4.26581618524023	0.0082095614469284	4H	599425545	599427573	+	Small nuclear ribonucleoprotein Sm D2 (Sm-D2) (snRNP core protein D2)
HORVU.MOREX.r3.2HG0187430	4.28396535928221	0.0079048577696718	2H	586665312	586668699	+	Predicted protein
HORVU.MOREX.r3.4HG0368890	4.29081757562327	0.00777871501072	4H	274336699	274358966	-	Predicted protein
HORVU.MOREX.r3.5HG0487290	4.29081757562327	0.00777871501072	5H	464123758	464126888	+	Predicted protein
HORVU.MOREX.r3.6HG0611730	4.30507624223191	0.0081708111321723	6H	488448066	488450472	-	H/ACA ribonucleoprotein complex subunit 2 (Nucleolar protein family A member 2)
HORVU.MOREX.r3.3HG0254990	4.33300059981708	0.0071950412922592	3H	184601537	184603487	+	Peroxidase (EC 1.11.1.7)
HORVU.MOREX.r3.2HG0171590	4.33599497706772	0.0070851688758651	2H	499376820	499380371	+	peptidylprolyl isomerase (EC 5.2.1.8)
HORVU.MOREX.r3.6HG0600910	4.34137711903194	2.7067874929025e-05	6H	413234283	413235859	-	Tonoplast intrinsic protein
HORVU.MOREX.r3.2HG0105020	4.3517254320523	0.0070642369418101	2H	19250304	19251766	+	Plasma membrane intrinsic protein
HORVU.MOREX.r3.5HG0519940	4.37527529093471	0.0013722720125679	5H	549111741	549113029	+	H15 domain-containing protein
HORVU.MOREX.r3.5HG0441980	4.39322107367868	0.0064354995008033	5H	92607075	92607932	-	Predicted protein
HORVU.MOREX.r3.1HG0007200	4.40089217133845	0.0060261715440798	1H	14710881	14717791	+	Glucose-6-phosphate isomerase (EC 5.3.1.9)
HORVU.MOREX.r3.2HG0195550	4.40336616727029	0.00600205338055	2H	613171888	613172532	-	Uncharacterized protein
HORVU.MOREX.r3.2HG0156390	4.40452659818485	0.0060549756791651	2H	377327975	377332874	-	Casein kinase II subunit alpha (CK II alpha) (EC 2.7.11.1)
HORVU.MOREX.r3.1HG0002510	4.40547422782597	0.0011913584108077	1H	5095542	5109506	-	methionine S-methyltransferase (EC 2.1.1.12)
HORVU.MOREX.r3.6HG0543740	4.41924562383618	0.006853127518896	6H	13485601	13486454	-	Histone H2A
HORVU.MOREX.r3.2HG0118560	4.42260408560616	0.0011169102979456	2H	62550367	62552280	-	Predicted protein
HORVU.MOREX.r3.4HG0401720	4.42304688607557	0.0060549756791651	4H	557362443	557363173	+	Histone H3
HORVU.MOREX.r3.3HG0299950	4.42346976847319	0.0056901718355672	3H	539147126	539148065	-	Uncharacterized protein
HORVU.MOREX.r3.7HG0746640	4.42872677083156	0.0011073654567939	7H	617941280	617942617	+	1-aminocyclopropane-1-carboxylate oxidase (EC 1.14.17.4) (Ethylene-forming enzyme)
HORVU.MOREX.r3.4HG0337820	4.42894136154914	0.0056499585536108	4H	19814344	19817813	+	UDP-glucose 6-dehydrogenase (EC 1.1.1.22)
HORVU.MOREX.r3.4HG0387120	4.44166414473733	0.0055207989839727	4H	467430681	467431373	+	Histone H2A
HORVU.MOREX.r3.5HG0499250	4.45574377792405	0.0056845187569174	5H	501437107	501437650	-	Histone H2A
HORVU.MOREX.r3.5HG0487640	4.46159494745836	0.0011107085010292	5H	465836658	465837423	+	Histone H2A
HORVU.MOREX.r3.2HG0180010	4.46245199051224	0.0052311723396808	2H	550873802	550875597	+	Leucine-rich repeat-containing N-terminal plant-type domain-containing protein
HORVU.MOREX.r3.5HG0487660	4.46299775837257	0.00110817698182	5H	465995058	465995819	-	Histone H2A
HORVU.MOREX.r3.7HG0667940	4.47148315410656	0.0050947828074279	7H	102223309	102227374	+	Predicted protein
HORVU.MOREX.r3.7HG0661680	4.47326745519987	0.0056901718355672	7H	67699921	67700635	+	SCP domain-containing protein
HORVU.MOREX.r3.3HG0230970	4.4748702334633	0.0051745339593068	3H	24924925	24925555	+	Histone H2B
HORVU.MOREX.r3.6HG0604450	4.48419054133941	0.0054583453681966	6H	444629021	444632630	-	Mitochondrial import inner membrane translocase subunit
HORVU.MOREX.r3.4HG0389470	4.49015061451536	0.0048794575600027	4H	484422751	484424664	-	LIM zinc-binding domain-containing protein
HORVU.MOREX.r3.1HG0080770	4.49762464414323	0.005107174656711	1H	486917687	486918340	+	Histone H4
HORVU.MOREX.r3.6HG0609520	4.50508066889614	0.004707388644036	6H	475282567	475286989	+	Predicted protein
HORVU.MOREX.r3.7HG0635170	4.50570505403659	0.0008988862697822	7H	2583657	2587436	-	Sucrose:sucrose 1-fructosyltransferase (EC 2.4.1.99)
HORVU.MOREX.r3.2HG0167060	4.51108570687013	0.0046228320160442	2H	468295998	468296759	+	Bifunctional inhibitor/plant lipid transfer protein/seed storage helical domain-containing protein
HORVU.MOREX.r3.1HG0059400	4.51997781155858	0.0046228320160442	1H	395766713	395769133	+	Acyl carrier protein
HORVU.MOREX.r3.3HG0303150	4.52335460204849	0.0044534581167657	3H	551828163	551828826	+	Predicted protein
HORVU.MOREX.r3.6HG0602990	4.5403279872334	0.0042644648269651	6H	429592936	429594782	+	HMG box domain-containing protein
HORVU.MOREX.r3.5HG0518150	4.54183242096459	0.0042980229903341	5H	545392230	545395659	-	Glutamate dehydrogenase
HORVU.MOREX.r3.2HG0194250	4.54745232005304	0.0041842929509457	2H	609083405	609085304	-	Predicted protein
HORVU.MOREX.r3.3HG0231550	4.55715157162965	0.0040934396238143	3H	26737811	26740042	-	EXPERA domain-containing protein
HORVU.MOREX.r3.1HG0029900	4.5595012322604	0.0041823230464738	1H	142338712	142341509	+	Proteasome subunit beta
HORVU.MOREX.r3.5HG0523560	4.56812620807534	0.0043001830246604	5H	556984018	556984930	-	Histone H2A
HORVU.MOREX.r3.4HG0398900	4.57423637185755	0.0046228320160442	4H	545077301	545078136	+	Histone H2A
HORVU.MOREX.r3.2HG0159360	4.57901042371478	0.003874473980348	2H	407161425	407163945	-	Predicted protein
HORVU.MOREX.r3.2HG0206500	4.61425163079783	0.003579080761517	2H	639445438	639452735	+	Fibronectin type III-like domain-containing protein
HORVU.MOREX.r3.5HG0525980	4.63266236990304	0.0034124736514278	5H	562645430	562650440	+	Dihydrolipoamide acetyltransferase component of pyruvate dehydrogenase complex (EC 2.3.1.-)
HORVU.MOREX.r3.5HG0504160	4.63409646176763	0.003579080761517	5H	512389116	512389677	-	Histone H4
HORVU.MOREX.r3.1HG0076700	4.64685869485164	0.0032706264521469	1H	475931637	475933038	-	Peroxidase (EC 1.11.1.7)
HORVU.MOREX.r3.1HG0007740	4.6504557073048	0.0033074578667506	1H	16287096	16287824	-	Bowman-Birk serine protease inhibitors family domain-containing protein
HORVU.MOREX.r3.2HG0146330	4.66110447495504	0.0004740504779101	2H	274291724	274293771	-	Ribosomal protein L15
HORVU.MOREX.r3.4HG0382720	4.66200800122375	0.0032706264521469	4H	431887220	431888411	+	UspA domain-containing protein
HORVU.MOREX.r3.3HG0315280	4.66715414208582	0.003248294890834	3H	587326212	587327839	+	Peptidase A1 domain-containing protein
HORVU.MOREX.r3.2HG0189940	4.68628118604377	0.0032420889436396	2H	597270628	597271149	-	Histone H4
HORVU.MOREX.r3.5HG0499580	4.68911502761836	0.0029343800115267	5H	502373871	502377799	-	Predicted protein
HORVU.MOREX.r3.1HG0056620	4.71864042127415	0.0030189038318284	1H	378522805	378524551	-	Uncharacterized protein
HORVU.MOREX.r3.2HG0207480	4.73004350328049	0.0026750535228837	2H	641708440	641708713	+	Wound-responsive family protein
HORVU.MOREX.r3.3HG0308560	4.73057608308102	0.0026425633920617	3H	567530884	567531103	-	Uncharacterized protein
HORVU.MOREX.r3.1HG0075230	4.74997244285195	0.0028755530759554	1H	471774719	471775375	+	Histone H3
HORVU.MOREX.r3.2HG0157340	4.75664545858941	0.0024864877696131	2H	384670468	384671520	-	Predicted protein
HORVU.MOREX.r3.3HG0304420	4.76371549242948	0.0028362620675125	3H	555827764	555828450	-	Histone H4
HORVU.MOREX.r3.4HG0353020	4.76606712187573	0.0004907614933882	4H	117813945	117814436	-	Histone H4
HORVU.MOREX.r3.2HG0132140	4.77598907651018	0.0023923221117348	2H	146164463	146175011	+	Predicted protein
HORVU.MOREX.r3.5HG0534120	4.77658629319677	0.0023198183667681	5H	579405016	579406197	-	Uncharacterized protein
HORVU.MOREX.r3.3HG0285730	4.78725620894038	0.0003248019622702	3H	466859367	466863054	-	Hyaluronan/mRNA-binding protein domain-containing protein
HORVU.MOREX.r3.2HG0127330	4.79914461630034	0.0022182809876054	2H	111116994	111117792	+	NADH-ubiquinone reductase complex 1 MLRQ subunit
HORVU.MOREX.r3.7HG0643670	4.79987789598742	0.0023969115181029	7H	17125156	17126546	+	Peroxidase (EC 1.11.1.7)
HORVU.MOREX.r3.5HG0500680	4.80696075205636	0.0022560963617744	5H	505009906	505013279	-	Acyl carrier protein
HORVU.MOREX.r3.5HG0464780	4.81843370762019	0.002142357928802	5H	326059296	326060146	+	HIG1 domain-containing protein
HORVU.MOREX.r3.1HG0021340	4.82805678033531	0.0020553964605932	1H	77796733	77797815	+	glutathione transferase (EC 2.5.1.18)
HORVU.MOREX.r3.1HG0061580	4.83037324073163	0.0020439078948874	1H	408176045	408176623	-	Metallothionein-like protein
HORVU.MOREX.r3.7HG0713280	4.83071039046949	0.0020606136049981	7H	485981576	485985164	+	Peroxidase (EC 1.11.1.7)
HORVU.MOREX.r3.6HG0543730	4.83837513594502	0.0020606136049981	6H	13482434	13483042	-	Histone H2B
HORVU.MOREX.r3.1HG0056630	4.84364447589081	0.0024009120216901	1H	378714725	378716942	+	Uncharacterized protein
HORVU.MOREX.r3.3HG0245120	4.84412484377289	0.001995900314172	3H	103009694	103011097	-	Fruit bromelain
HORVU.MOREX.r3.1HG0006610	4.88632444794821	0.0020426230927524	1H	13953185	13954051	+	Histone H2A
HORVU.MOREX.r3.5HG0510590	4.89058626758553	0.0001875311959433	5H	527021268	527043119	+	Beta-glucosidase
HORVU.MOREX.r3.3HG0325250	4.89661324097811	9.77905357952315e-07	3H	607482768	607484050	+	Peroxidase (EC 1.11.1.7)
HORVU.MOREX.r3.1HG0054530	4.89797098737713	0.0017002155670042	1H	364793629	364798249	+	Major facilitator superfamily (MFS) profile domain-containing protein
HORVU.MOREX.r3.7HG0698110	4.90472486443262	0.0016661942551694	7H	366737824	366743758	-	Cellulose synthase-like CslF6 (Predicted protein)
HORVU.MOREX.r3.2HG0180580	4.90755185846613	0.0017081749363791	2H	554285925	554288453	+	Proliferating cell nuclear antigen
HORVU.MOREX.r3.7HG0738450	4.93439466639249	0.0015740722999112	7H	599993533	599994301	-	Bifunctional inhibitor/plant lipid transfer protein/seed storage helical domain-containing protein
HORVU.MOREX.r3.7HG0738560	4.94661762659965	0.0014892469085363	7H	600344727	600345487	-	Bifunctional inhibitor/plant lipid transfer protein/seed storage helical domain-containing protein
HORVU.MOREX.r3.7HG0658840	4.94688787719555	0.0015367029479108	7H	58141167	58141900	+	Histone H2A
HORVU.MOREX.r3.2HG0167500	4.95213006386889	0.0015302735507628	2H	471627573	471629150	+	Extensin
HORVU.MOREX.r3.1HG0060320	4.96895454608937	0.0014718217802879	1H	401913160	401913859	-	Histone H3
HORVU.MOREX.r3.7HG0728480	4.97248100342136	0.0013858362153809	7H	570673212	570675041	-	Peroxidase (EC 1.11.1.7)
HORVU.MOREX.r3.1HG0025050	4.9981376057542	0.0013016737282808	1H	101077350	101078820	+	Peroxidase (EC 1.11.1.7)
HORVU.MOREX.r3.6HG0628320	5.00300303786525	0.0013166535023132	6H	549695562	549696597	-	Germin-like protein
HORVU.MOREX.r3.1HG0093420	5.01233809022768	0.0012828801600585	1H	511553045	511557115	-	Thioredoxin domain-containing protein
HORVU.MOREX.r3.1HG0066260	5.02992667784124	0.0011925807293572	1H	433062562	433065408	-	Tubulin beta chain
HORVU.MOREX.r3.6HG0543750	5.03894524682581	0.0012392690311408	6H	13537779	13538642	+	Histone H2A
HORVU.MOREX.r3.1HG0060270	5.04035673075539	0.0012011081695211	1H	401851865	401852530	+	Histone H3
HORVU.MOREX.r3.4HG0336270	5.0848050508702	0.0010556600326954	4H	13874211	13878361	-	4-hydroxy-7-methoxy-3-oxo-3,4-dihydro-2H-1,4-benzoxazin-2-yl glucosidebeta-D-glucosidase (EC 3.2.1.182)
HORVU.MOREX.r3.1HG0012520	5.10444579717705	0.0010523838559842	1H	31110908	31111133	-	Subtilisin-chymotrypsin inhibitor-2A
HORVU.MOREX.r3.2HG0185840	5.10617915780815	0.0010015736971043	2H	578557721	578558288	+	Histone H4
HORVU.MOREX.r3.2HG0215300	5.1084821033458	0.0009862871248874	2H	658182271	658183948	-	Peroxidase (EC 1.11.1.7)
HORVU.MOREX.r3.1HG0004290	5.21842719182813	0.0007967786918844	1H	9112787	9113012	+	Subtilisin-chymotrypsin inhibitor-2A
HORVU.MOREX.r3.2HG0215280	5.2389542220848	0.0006862000988757	2H	658137896	658139373	-	Peroxidase (EC 1.11.1.7)
HORVU.MOREX.r3.4HG0389060	5.27994112710889	0.0006049667529382	4H	481971292	481974686	+	mannose-1-phosphate guanylyltransferase (EC 2.7.7.13)
HORVU.MOREX.r3.2HG0207560	5.28355508006709	0.0005960727324691	2H	641756255	641756528	+	Wound induced protein
HORVU.MOREX.r3.2HG0172050	5.32465971295627	0.0005222030074822	2H	502654339	502658885	+	RRM domain-containing protein
HORVU.MOREX.r3.1HG0074500	5.351148040534	0.0005533539357908	1H	468600600	468601250	-	Histone H3
HORVU.MOREX.r3.5HG0520110	5.36522994939769	0.0005280467173675	5H	549545922	549547277	-	H15 domain-containing protein
HORVU.MOREX.r3.1HG0056420	5.37451989279336	0.000470257832862	1H	376625862	376626931	+	Predicted protein
HORVU.MOREX.r3.4HG0346720	5.3830677956198	2.00574916541588e-05	4H	69949987	69953830	+	Protein disulfide-isomerase (EC 5.3.4.1)
HORVU.MOREX.r3.1HG0079120	5.44188495941871	0.0003649920028056	1H	483012013	483017803	-	phosphoethanolamine N-methyltransferase (EC 2.1.1.103)
HORVU.MOREX.r3.7HG0653380	5.4848341761763	0.0003277127126251	7H	40683563	40685505	+	Esterase
HORVU.MOREX.r3.3HG0324070	5.50814089916791	0.0002999677836516	3H	605061318	605063518	-	Uncharacterized protein
HORVU.MOREX.r3.4HG0395540	5.55965879067673	8.26651791620561e-06	4H	526911522	526915057	+	Glutamine synthetase (EC 6.3.1.2)
HORVU.MOREX.r3.1HG0080760	5.56317358953131	0.000296111673282	1H	486915575	486916235	+	Histone H3
HORVU.MOREX.r3.4HG0405650	5.66109354999497	0.000182115908728	4H	571475739	571477477	-	AP2/ERF domain-containing protein
HORVU.MOREX.r3.1HG0002880	5.67043535864202	0.0001771645673899	1H	5716510	5718523	-	V-type proton ATPase proteolipid subunit
HORVU.MOREX.r3.3HG0318590	5.73802638019631	0.0001422636055885	3H	592833484	592835072	-	Predicted protein
HORVU.MOREX.r3.1HG0061530	5.79560301637316	0.0001165196693317	1H	408028322	408028849	-	Metallothionein-like protein
HORVU.MOREX.r3.5HG0493200	5.83320942796765	0.0001041128468144	5H	485246688	485250197	+	FAS1 domain-containing protein
HORVU.MOREX.r3.6HG0552800	5.84347909950932	0.0001146920982291	6H	34685668	34686448	+	Histone H2B
HORVU.MOREX.r3.3HG0245250	5.97112497034378	6.39682952190153e-05	3H	104032549	104033922	-	Uncharacterized protein
HORVU.MOREX.r3.1HG0056150	5.9753373689144	6.7594000522514e-05	1H	374661895	374662513	-	Bifunctional inhibitor/plant lipid transfer protein/seed storage helical domain-containing protein
HORVU.MOREX.r3.3HG0309280	6.02465790177807	5.31953638133099e-05	3H	569823075	569823884	+	Bifunctional inhibitor/plant lipid transfer protein/seed storage helical domain-containing protein
HORVU.MOREX.r3.2HG0215610	6.04651907872603	4.94951818222479e-05	2H	658696765	658698236	+	Peroxidase (EC 1.11.1.7)
HORVU.MOREX.r3.5HG0474460	6.2791447676956	2.21973347442779e-05	5H	396826306	396840977	+	Protein kinase domain-containing protein
HORVU.MOREX.r3.4HG0410510	6.45314051146235	1.19131420125143e-05	4H	589066900	589067539	+	Predicted protein
HORVU.MOREX.r3.2HG0112640	6.65127344130445	5.98031359848015e-06	2H	41496867	41498753	-	Peroxidase (EC 1.11.1.7)
HORVU.MOREX.r3.2HG0191450	6.7946861496219	4.30640975684047e-06	2H	602068721	602070283	-	Predicted protein
HORVU.MOREX.r3.2HG0215250	7.32882877530155	3.62264789931083e-07	2H	658096616	658097913	-	Peroxidase (EC 1.11.1.7)
HORVU.MOREX.r3.4HG0405640	7.35148808679693	3.3283791308873e-07	4H	571456136	571456865	+	Bowman-Birk serine protease inhibitors family domain-containing protein

## Sheet: Table S8
DEGs of the wild accession HID0380 compared with the control
GeneID	log2(FC)	P-adj	Chromosome	Start	End	Strand	Description
HORVU.MOREX.r3.6HG0588430	-5.35995997954625	1.9763580493851302e-74	6H	305145254	305145503	-	Uncharacterized protein
HORVU.MOREX.r3.5HG0423410	-5.00528272723383	3.60551675377953e-33	5H	7774177	7776212	-	Uncharacterized protein
HORVU.MOREX.r3.1HG0028870	-4.81765276963819	4.77057776742541e-31	1H	132490705	132491083	-	Protein TAR1
HORVU.MOREX.r3.7HG0683350	-7.35521122460522	1.30017581576386e-27	7H	199412518	199412938	-	Protein TAR1
HORVU.MOREX.r3.2HG0133820	-7.16009464102367	5.0816483468978696e-26	2H	158835025	158835328	-	Uncharacterized protein
HORVU.MOREX.r3.5HG0505320	-3.97347405944872	5.56689699555204e-24	5H	515221517	515226755	-	NADPH--cytochrome P450 reductase (CPR) (P450R) (EC 1.6.2.4)
HORVU.MOREX.r3.6HG0562930	-6.70881534861326	5.24245666837905e-21	6H	82367129	82367426	-	Uncharacterized protein
HORVU.MOREX.r3.4HG0418350	-6.57847590305292	3.01155259599605e-20	4H	608842465	608846992	-	Uncharacterized protein
HORVU.MOREX.r3.6HG0562080	-4.1880846983032	5.96052344522166e-20	6H	81975993	81977953	-	Uncharacterized protein
HORVU.MOREX.r3.5HG0509970	-6.68412939558829	1.58749526946643e-14	5H	525536323	525537516	-	HSF-type DNA-binding domain-containing protein
HORVU.MOREX.r3.1HG0028400	-5.36494596534525	1.57378483296061e-13	1H	132107657	132107954	-	Uncharacterized protein
HORVU.MOREX.r3.5HG0514790	3.7470839194685	1.57378483296061e-13	5H	538099749	538277813	-	Elongation factor 1-alpha
HORVU.MOREX.r3.2HG0099870	-5.77305653512067	2.3263183616271e-12	2H	10674706	10677404	+	Histidine kinase/HSP90-like ATPase domain-containing protein
HORVU.MOREX.r3.4HG0363180	5.25507391512023	8.78934154210773e-12	4H	213772594	213774669	-	Predicted protein
HORVU.MOREX.r3.7HG0664810	-3.3808052124927	5.0782638129357796e-11	7H	82614016	82615098	+	SHSP domain-containing protein
HORVU.MOREX.r3.7HG0664840	-5.23227632506794	1.1341525877633e-09	7H	82742954	82744064	+	SHSP domain-containing protein
HORVU.MOREX.r3.5HG0435980	-5.23218424816196	1.2784074360018201e-09	5H	53306928	53307306	+	Protein TAR1
HORVU.MOREX.r3.5HG0521040	5.3410568839194	1.5899510290987602e-09	5H	551346370	551350421	+	Predicted protein
HORVU.MOREX.r3.3HG0224620	-2.61878521611473	7.48317832743169e-09	3H	12320007	12323038	+	Histidine-rich calcium-binding protein
HORVU.MOREX.r3.3HG0304680	4.57423705839684	1.03259329517044e-08	3H	556765642	556768015	+	Fructose-bisphosphate aldolase (EC 4.1.2.13)
HORVU.MOREX.r3.5HG0421460	5.38480175392091	1.9846644099048e-08	5H	5219755	5220806	-	Predicted protein
HORVU.MOREX.r3.5HG0435650	-4.86730832197353	2.8788869498216e-08	5H	53137801	53138098	-	Uncharacterized protein
HORVU.MOREX.r3.7HG0664900	-4.86354214428282	3.27927397303465e-08	7H	83113823	83114562	-	SHSP domain-containing protein
HORVU.MOREX.r3.3HG0237680	-8.70608072794774	9.76893280605861e-08	3H	53532591	53533387	+	SHSP domain-containing protein
HORVU.MOREX.r3.7HG0737210	-4.01303709279725	9.88944145173991e-08	7H	597195492	597196233	+	NAD(P)H dehydrogenase subunit H
HORVU.MOREX.r3.3HG0329490	4.84152389341187	1.01542576233167e-07	3H	616942374	616943013	+	Metallothionein-like protein
HORVU.MOREX.r3.1HG0077030	-7.52033197745119	1.10849567587258e-07	1H	476905043	476908398	+	Chaperone protein ClpB1 (ATP-dependent Clp protease ATP-binding subunit ClpB homolog 1) (Casein lytic proteinase B1) (Heat shock protein 101)
HORVU.MOREX.r3.4HG0357980	5.63721967319359	1.27243020306309e-07	4H	158111958	158112791	+	Metallothionein-like protein
HORVU.MOREX.r3.6HG0592050	5.56410674908786	1.37869188413524e-07	6H	338753657	338756688	+	Glyceraldehyde-3-phosphate dehydrogenase (EC 1.2.1.-)
HORVU.MOREX.r3.7HG0732460	8.06770770595638	1.80274858092533e-07	7H	584342381	584343152	+	Predicted protein
HORVU.MOREX.r3.5HG0435960	-5.25927777822825	2.13605640160398e-07	5H	53297752	53298130	+	Protein TAR1
HORVU.MOREX.r3.5HG0436090	-5.54170463017773	2.92090906411237e-07	5H	53373407	53373704	-	Uncharacterized protein
HORVU.MOREX.r3.3HG0226120	-6.38800528486411	3.81502165273567e-07	3H	14342942	14343681	+	SHSP domain-containing protein
HORVU.MOREX.r3.6HG0596580	5.40615771746975	3.81502165273567e-07	6H	378091131	378349938	-	Phenylalanine ammonia-lyase (EC 4.3.1.24)
HORVU.MOREX.r3.7HG0664850	-6.38800528486411	3.81502165273567e-07	7H	82803931	82804672	+	SHSP domain-containing protein
HORVU.MOREX.r3.7HG0703580	7.83908089237397	3.81502165273567e-07	7H	415052429	415055809	-	Glyceraldehyde-3-phosphate dehydrogenase (EC 1.2.1.-)
HORVU.MOREX.r3.7HG0711840	5.42948735109172	5.30925936848209e-07	7H	474991057	474992037	+	Eukaryotic translation initiation factor 4C
HORVU.MOREX.r3.2HG0107850	4.55075466822697	6.70884080929208e-07	2H	26105555	26108741	+	Elongation factor 1-alpha
HORVU.MOREX.r3.3HG0237670	-8.2962728249511	7.25121836440484e-07	3H	53528641	53529130	+	SHSP domain-containing protein
HORVU.MOREX.r3.6HG0609880	5.29579282217346	8.97483155341295e-07	6H	478210643	478213659	+	ADP/ATP translocase (ADP,ATP carrier protein)
HORVU.MOREX.r3.5HG0490180	2.6255781235038	1.00794804295443e-06	5H	475526822	475530641	-	Histidine kinase/HSP90-like ATPase domain-containing protein
HORVU.MOREX.r3.6HG0549510	5.20223667087815	1.2857323723875e-06	6H	24959284	24960239	-	Peptidyl-prolyl cis-trans isomerase (PPIase) (EC 5.2.1.8)
HORVU.MOREX.r3.4HG0355570	-4.33354200230038	1.3741680945265e-06	4H	138547572	138547869	-	Uncharacterized protein
HORVU.MOREX.r3.1HG0070060	7.49489540992057	1.45393838009643e-06	1H	449500000	449504214	+	ADP-ribosylation factor
HORVU.MOREX.r3.7HG0668510	6.40679419461735	2.22715890118986e-06	7H	104749781	104751293	-	Uncharacterized protein
HORVU.MOREX.r3.2HG0215250	7.31794521698585	2.92954867783893e-06	2H	658096616	658097913	-	Peroxidase (EC 1.11.1.7)
HORVU.MOREX.r3.4HG0405640	7.34265416508299	2.92954867783893e-06	4H	571456136	571456865	+	Bowman-Birk serine protease inhibitors family domain-containing protein
HORVU.MOREX.r3.5HG0483760	-6.12432614656104	3.26060039359356e-06	5H	444151126	444151366	+	Uncharacterized protein
HORVU.MOREX.r3.1HG0069750	5.0172976072604	3.97235617176858e-06	1H	448683350	448685648	+	Predicted protein
HORVU.MOREX.r3.5HG0521940	4.99249111621305	4.24833623188616e-06	5H	553112985	553113180	-	Secreted protein
HORVU.MOREX.r3.4HG0333810	4.30941296684432	4.44238608269115e-06	4H	6441941	6442945	+	RRM domain-containing protein
HORVU.MOREX.r3.2HG0116210	4.24845220069301	5.61046849081968e-06	2H	53652639	53654623	-	Predicted protein
HORVU.MOREX.r3.7HG0668900	7.05083221590418	8.03236119267545e-06	7H	106169411	106170223	+	SCP domain-containing protein
HORVU.MOREX.r3.3HG0330200	7.01827171855057	8.98856222814284e-06	3H	618265888	618267204	-	Predicted protein (Tonoplast intrinsic protein)
HORVU.MOREX.r3.5HG0435490	-4.54312192321561	1.05078237546991e-05	5H	53064853	53065231	+	Protein TAR1
HORVU.MOREX.r3.5HG0444110	4.89698999410186	1.05078237546991e-05	5H	110546142	110547012	-	Bet v I/Major latex protein domain-containing protein
HORVU.MOREX.r3.7HG0664870	-6.82660313212357	1.10329524557858e-05	7H	83014862	83015252	-	SHSP domain-containing protein
HORVU.MOREX.r3.6HG0613270	4.79687896878519	1.25687572294422e-05	6H	495214922	495218750	-	Glutamine synthetase (EC 6.3.1.2)
HORVU.MOREX.r3.1HG0043190	6.88015834588441	1.5290678074607e-05	1H	278983847	278986880	+	Malate dehydrogenase (EC 1.1.1.37)
HORVU.MOREX.r3.4HG0337050	5.97971635644155	1.58383282543586e-05	4H	16992998	16996053	+	Predicted protein
HORVU.MOREX.r3.5HG0526250	4.04889774234449	2.01070602333518e-05	5H	563090169	563094507	+	Heat shock cognate 70 kDa protein
HORVU.MOREX.r3.2HG0133340	6.77356291273258	2.11581564479688e-05	2H	155853506	155856463	+	Uncharacterized protein
HORVU.MOREX.r3.4HG0385790	4.69723568140232	2.35851056689325e-05	4H	458346155	458349159	-	L-ascorbate peroxidase (EC 1.11.1.11)
HORVU.MOREX.r3.3HG0237580	-2.6400820959928	2.44200525376227e-05	3H	52896420	52897201	-	Predicted protein
HORVU.MOREX.r3.5HG0475360	4.67139937905052	2.48172251968709e-05	5H	401840524	401843897	+	Uncharacterized protein
HORVU.MOREX.r3.2HG0191450	6.7702237561682	2.53973535605227e-05	2H	602068721	602070283	-	Predicted protein
HORVU.MOREX.r3.1HG0026070	5.84998033188795	2.69991680063009e-05	1H	110682447	110684795	+	Ribosomal protein L10e/L16 domain-containing protein
HORVU.MOREX.r3.4HG0346720	3.95884146939164	2.69991680063009e-05	4H	69949987	69953830	+	Protein disulfide-isomerase (EC 5.3.4.1)
HORVU.MOREX.r3.7HG0651580	6.66293142943487	3.27933620572039e-05	7H	32708119	32710502	+	Profilin
HORVU.MOREX.r3.2HG0112640	6.61675973282034	3.5893652523799e-05	2H	41496867	41498753	-	Peroxidase (EC 1.11.1.7)
HORVU.MOREX.r3.2HG0173530	4.61523943170847	3.5893652523799e-05	2H	513464889	513468342	+	14-3-3 domain-containing protein
HORVU.MOREX.r3.5HG0479000	4.56940529474129	4.05036839117638e-05	5H	423592017	423593781	-	cinnamyl-alcohol dehydrogenase (EC 1.1.1.195)
HORVU.MOREX.r3.2HG0202670	3.44132042695281	4.32780255826672e-05	2H	630028185	630034499	-	Plasma membrane ATPase (EC 7.1.2.1)
HORVU.MOREX.r3.2HG0178690	3.90372432746016	4.40175654027773e-05	2H	545183229	545185954	+	S-adenosylmethionine decarboxylase proenzyme (EC 4.1.1.50)
HORVU.MOREX.r3.7HG0716730	6.51705553883275	4.81501837041082e-05	7H	504687162	504690570	+	Elongation factor 1-gamma 2
HORVU.MOREX.r3.2HG0107740	6.5236637134998	5.02058355473666e-05	2H	25937511	25940563	+	L-ascorbate peroxidase (EC 1.11.1.11)
HORVU.MOREX.r3.1HG0057590	4.52115784392999	5.55749402682196e-05	1H	383419736	383422307	+	Nucleoside diphosphate kinase (EC 2.7.4.6)
HORVU.MOREX.r3.7HG0697810	6.46373611702684	5.68931890821393e-05	7H	359800980	359807342	+	Co-chaperone protein p23
HORVU.MOREX.r3.4HG0369570	3.39077034946748	5.70584117932382e-05	4H	292176330	292178886	+	UDP-arabinopyranose mutase (EC 5.4.99.30)
HORVU.MOREX.r3.5HG0436340	-3.41901277022538	5.70584117932382e-05	5H	53603470	53603788	+	Secreted protein
HORVU.MOREX.r3.5HG0502760	3.9549314261674	5.77473982946327e-05	5H	510178355	510178863	+	Histone H4
HORVU.MOREX.r3.4HG0385300	4.47474568950928	6.33083345247363e-05	4H	455087881	455090747	+	Elongation factor 1-alpha
HORVU.MOREX.r3.1HG0084510	6.4081331268816	6.53788536573527e-05	1H	494418602	494422268	-	ATP synthase subunit beta (EC 7.1.2.2)
HORVU.MOREX.r3.4HG0410510	6.41056212730263	6.53788536573527e-05	4H	589066900	589067539	+	Predicted protein
HORVU.MOREX.r3.5HG0434930	-6.50227892758804	6.54926346260056e-05	5H	52777615	52777993	+	Protein TAR1
HORVU.MOREX.r3.2HG0115300	6.42342705413621	6.92777822289081e-05	2H	50452321	50455802	+	superoxide dismutase (EC 1.15.1.1)
HORVU.MOREX.r3.2HG0201390	4.45035967647326	6.92777822289081e-05	2H	626306648	626309161	-	Adenosylhomocysteinase (EC 3.13.2.1)
HORVU.MOREX.r3.4HG0389340	-2.62488238990128	6.92777822289081e-05	4H	483650966	483651820	+	Predicted protein
HORVU.MOREX.r3.3HG0291100	3.84377096809492	7.3131506162425e-05	3H	499140925	499144161	-	glutathione transferase (EC 2.5.1.18)
HORVU.MOREX.r3.2HG0170930	-6.48852033024181	7.33801352643926e-05	2H	494443871	494444839	+	SHSP domain-containing protein
HORVU.MOREX.r3.1HG0089460	3.30385414815361	9.52006614061135e-05	1H	503425300	503430730	+	Aspartic proteinase
HORVU.MOREX.r3.4HG0407580	6.29122498021755	9.78227233033857e-05	4H	579244758	579246276	-	Predicted protein (Tonoplast intrinsic protein)
HORVU.MOREX.r3.5HG0474460	6.23015916698334	0.0001156177981949	5H	396826306	396840977	+	Protein kinase domain-containing protein
HORVU.MOREX.r3.1HG0090940	3.70920362457613	0.0001259245923608	1H	506233506	506236371	-	GTP-binding nuclear protein
HORVU.MOREX.r3.2HG0120240	6.19823587286383	0.000128330018572	2H	70503836	70507035	+	Predicted protein
HORVU.MOREX.r3.3HG0325250	5.45811365063554	0.0001284382088633	3H	607482768	607484050	+	Peroxidase (EC 1.11.1.7)
HORVU.MOREX.r3.5HG0421370	6.18952093577295	0.00012882760084	5H	4909829	4922212	+	phosphopyruvate hydratase (EC 4.2.1.11)
HORVU.MOREX.r3.2HG0194280	4.31470954926759	0.0001317001081407	2H	609202079	609204879	+	Predicted protein
HORVU.MOREX.r3.1HG0024040	3.65302961112726	0.000140678173644	1H	94674825	94678437	-	protein disulfide-isomerase (EC 5.3.4.1)
HORVU.MOREX.r3.3HG0313690	6.15942138754659	0.000140678173644	3H	583675360	583676811	-	glutathione transferase (EC 2.5.1.18)
HORVU.MOREX.r3.6HG0600910	6.17428028897147	0.000140678173644	6H	413234283	413235859	-	Tonoplast intrinsic protein
HORVU.MOREX.r3.7HG0661420	3.65883461990214	0.000140678173644	7H	66480498	66487268	-	Sucrose synthase (EC 2.4.1.13)
HORVU.MOREX.r3.4HG0395540	5.42509678534274	0.0001439345965413	4H	526911522	526915057	+	Glutamine synthetase (EC 6.3.1.2)
HORVU.MOREX.r3.6HG0574540	6.14454787647527	0.0001439345965413	6H	159074206	159076775	+	S-adenosylmethionine synthase (EC 2.5.1.6)
HORVU.MOREX.r3.5HG0519970	6.08297145178682	0.0001769850697912	5H	549314134	549315294	+	Predicted protein
HORVU.MOREX.r3.3HG0300700	6.05920488093575	0.0001885311390223	3H	541696805	541700027	-	Ribosomal protein
HORVU.MOREX.r3.7HG0728380	6.07004658257908	0.0001885311390223	7H	570111727	570114078	-	Leucine-rich repeat-containing N-terminal plant-type domain-containing protein
HORVU.MOREX.r3.2HG0140090	5.34808414238885	0.0001894477380628	2H	205911732	205914277	+	Succinate dehydrogenase subunit 3
HORVU.MOREX.r3.4HG0355580	-4.41754423428093	0.0001894477380628	4H	138549112	138549490	+	Protein TAR1
HORVU.MOREX.r3.7HG0664880	-7.20727988574968	0.0001903271314051	7H	83037627	83038245	-	SHSP domain-containing protein
HORVU.MOREX.r3.7HG0724830	6.06179757517142	0.0001903271314051	7H	553496228	553498165	-	Zinc finger A20 and AN1 domain-containing stress-associated protein 8
HORVU.MOREX.r3.1HG0005600	6.02659861491883	0.0002026612406222	1H	11494735	11495674	+	Metallothionein-like protein
HORVU.MOREX.r3.5HG0492720	-2.03196221884429	0.0002156299167974	5H	484195576	484197118	-	Predicted protein
HORVU.MOREX.r3.2HG0215610	5.98920358808421	0.000228656856068	2H	658696765	658698236	+	Peroxidase (EC 1.11.1.7)
HORVU.MOREX.r3.7HG0713520	5.98645937584432	0.000228656856068	7H	487310660	487316166	+	Predicted protein
HORVU.MOREX.r3.7HG0714960	2.52393428097525	0.000228656856068	7H	497109074	497112956	-	lactoylglutathione lyase (EC 4.4.1.5) (Glyoxalase I)
HORVU.MOREX.r3.1HG0070630	5.27950437659303	0.0002376719746629	1H	451745203	451748776	-	NADH dehydrogenase [ubiquinone] 1 alpha subcomplex subunit 1
HORVU.MOREX.r3.3HG0289290	5.95187483315827	0.0002603272625907	3H	488626716	488628921	+	ATP synthase subunit epsilon, mitochondrial
HORVU.MOREX.r3.3HG0297350	4.1611000231866	0.0002635077312935	3H	528274572	528277831	+	E2 ubiquitin-conjugating enzyme (EC 2.3.2.23)
HORVU.MOREX.r3.4HG0349380	5.93204769276136	0.0002668153133066	4H	92076530	92079177	+	60S ribosomal protein L3
HORVU.MOREX.r3.1HG0056150	5.91585154068509	0.0002848055920115	1H	374661895	374662513	-	Bifunctional inhibitor/plant lipid transfer protein/seed storage helical domain-containing protein
HORVU.MOREX.r3.3HG0245250	5.91126837746337	0.0002848055920115	3H	104032549	104033922	-	Uncharacterized protein
HORVU.MOREX.r3.5HG0512800	-3.0644420743364	0.0002848055920115	5H	532481839	532483816	+	Predicted protein
HORVU.MOREX.r3.2HG0208810	5.89983712813115	0.0002880381811467	2H	644199709	644202392	-	E2 ubiquitin-conjugating enzyme (EC 2.3.2.23)
HORVU.MOREX.r3.4HG0346230	-4.37939656672346	0.0003158674349278	4H	66875293	66876227	+	Predicted protein
HORVU.MOREX.r3.4HG0345740	5.84152352272679	0.0003690943512402	4H	62961422	62964755	+	alcohol dehydrogenase (EC 1.1.1.1)
HORVU.MOREX.r3.2HG0156100	5.16040623524163	0.0003691033347902	2H	375770863	375772935	+	Eukaryotic translation initiation factor 5A (eIF-5A)
HORVU.MOREX.r3.5HG0530190	5.16256247549714	0.0003790635625417	5H	571759522	571762237	+	Ferredoxin
HORVU.MOREX.r3.2HG0146330	5.77792736264308	0.0004384141751426	2H	274291724	274293771	-	Ribosomal protein L15
HORVU.MOREX.r3.5HG0493200	5.76801082298608	0.0004384141751426	5H	485246688	485250197	+	FAS1 domain-containing protein
HORVU.MOREX.r3.6HG0553900	5.76073583329456	0.0004445793769896	6H	37693127	37706502	-	Uncharacterized protein
HORVU.MOREX.r3.5HG0444150	5.14751622330845	0.0004473579752521	5H	110689476	110690210	-	Bet v I/Major latex protein domain-containing protein
HORVU.MOREX.r3.7HG0687630	4.04979817580483	0.0004473579752521	7H	238654015	238656869	-	Acyl carrier protein
HORVU.MOREX.r3.1HG0061530	5.72903079967373	0.0004851089549945	1H	408028322	408028849	-	Metallothionein-like protein
HORVU.MOREX.r3.6HG0616540	5.71890004726628	0.0004989179626783	6H	512847962	512852948	+	peptidylprolyl isomerase (EC 5.2.1.8)
HORVU.MOREX.r3.1HG0082050	5.07645555896845	0.0005510117898922	1H	489759809	489762628	-	Tubulin alpha chain
HORVU.MOREX.r3.3HG0277670	5.67694031242267	0.0005642953174066	3H	412193131	412195876	-	Iron-sulfur cluster assembly protein
HORVU.MOREX.r3.6HG0568470	-3.87506160841466	0.0005642953174066	6H	112462552	112469161	+	Predicted protein
HORVU.MOREX.r3.4HG0332030	5.6728836125659	0.0005684099382514	4H	2308154	2310748	-	Ubiquitin-like domain-containing protein
HORVU.MOREX.r3.3HG0318590	5.66936887993162	0.000569779843055	3H	592833484	592835072	-	Predicted protein
HORVU.MOREX.r3.2HG0110760	5.66350477742605	0.0005826809855803	2H	33605688	33607819	+	Predicted protein
HORVU.MOREX.r3.5HG0459240	5.02608208548869	0.0005826809855803	5H	278378114	278381155	-	DUF3700 domain-containing protein
HORVU.MOREX.r3.7HG0721250	5.65530972191112	0.0005826809855803	7H	536310272	536312594	-	NADH dehydrogenase [ubiquinone] 1 beta subcomplex subunit 9 (Complex I-B22) (NADH-ubiquinone oxidoreductase B22 subunit)
HORVU.MOREX.r3.7HG0749360	5.66893313826981	0.0005826809855803	7H	623036580	623040102	-	Clathrin light chain
HORVU.MOREX.r3.6HG0628850	5.65180449086922	0.0005870038619892	6H	550931877	550933383	+	Ribosomal protein L37
HORVU.MOREX.r3.5HG0435820	-3.32982955384918	0.0006020874550426	5H	53248492	53248687	+	Uncharacterized protein
HORVU.MOREX.r3.2HG0160800	5.6676635079379	0.0006185489998069	2H	420203894	420208944	-	Uncharacterized protein
HORVU.MOREX.r3.4HG0349120	5.02000704469371	0.0006185489998069	4H	90669593	90672107	+	V-type proton ATPase proteolipid subunit
HORVU.MOREX.r3.1HG0083720	5.62465704150491	0.0006785436757161	1H	493170396	493171069	+	Predicted protein
HORVU.MOREX.r3.1HG0002880	5.59946993351324	0.0006806513449648	1H	5716510	5718523	-	V-type proton ATPase proteolipid subunit
HORVU.MOREX.r3.4HG0338800	5.59618580695746	0.000690037583424	4H	23742767	23745909	+	Tubulin alpha chain
HORVU.MOREX.r3.4HG0405650	5.58977535113883	0.0006932865988522	4H	571475739	571477477	-	AP2/ERF domain-containing protein
HORVU.MOREX.r3.2HG0114930	5.63611228879441	0.0006993431417232	2H	49019789	49023604	-	Nucleolar protein 58
HORVU.MOREX.r3.6HG0624640	5.57530857365148	0.0007188675276349	6H	540936029	540937772	+	Uncharacterized protein
HORVU.MOREX.r3.3HG0309580	5.58585602949381	0.0007233936579685	3H	570838107	570840006	+	RRM domain-containing protein
HORVU.MOREX.r3.6HG0608130	5.56711638174407	0.0007267957628944	6H	466797571	466801166	-	ATP synthase subunit O, mitochondrial
HORVU.MOREX.r3.2HG0125550	3.90445016752452	0.0007470632343802	2H	101511161	101514199	+	Translation elongation factor EF1B beta/delta subunit guanine nucleotide exchange domain-containing protein
HORVU.MOREX.r3.4HG0417900	5.55648373513678	0.0007498045295099	4H	607643135	607646186	+	Nascent polypeptide-associated complex subunit beta
HORVU.MOREX.r3.5HG0487640	5.57484130143922	0.0007498045295099	5H	465836658	465837423	+	Histone H2A
HORVU.MOREX.r3.5HG0487660	5.57627381236072	0.0007498045295099	5H	465995058	465995819	-	Histone H2A
HORVU.MOREX.r3.3HG0225040	-6.03324220712432	0.0007498257752127	3H	12759737	12760193	-	SHSP domain-containing protein
HORVU.MOREX.r3.7HG0746640	5.54532073307348	0.0007498257752127	7H	617941280	617942617	+	1-aminocyclopropane-1-carboxylate oxidase (EC 1.14.17.4) (Ethylene-forming enzyme)
HORVU.MOREX.r3.2HG0118560	5.53850176594375	0.000764937660603	2H	62550367	62552280	-	Predicted protein
HORVU.MOREX.r3.2HG0156310	2.93881078473667	0.0007703688364373	2H	377049710	377051438	-	Predicted protein
HORVU.MOREX.r3.2HG0194850	3.89730256431428	0.0007703688364373	2H	611351823	611355953	+	protein-disulfide reductase (EC 1.8.1.8)
HORVU.MOREX.r3.4HG0340560	5.53048405164739	0.0007703688364373	4H	30606508	30610888	-	CBS domain-containing protein
HORVU.MOREX.r3.1HG0010890	2.91613523153543	0.0007926137994932	1H	25695615	25698464	+	Predicted protein
HORVU.MOREX.r3.5HG0524420	5.53175515236116	0.000793610222642	5H	559201304	559204106	+	ADP-ribosylation factor
HORVU.MOREX.r3.2HG0173550	3.35734036126421	0.000795156044817	2H	513587873	513589103	-	Prohibitin
HORVU.MOREX.r3.1HG0048030	5.50515369581772	0.000812660510146	1H	315131189	315133758	-	Predicted protein
HORVU.MOREX.r3.4HG0333100	5.50944271185195	0.000812660510146	4H	4808802	4814643	+	5-methyltetrahydropteroyltriglutamate--homocysteine S-methyltransferase (EC 2.1.1.14)
HORVU.MOREX.r3.2HG0130420	5.50362490745458	0.0008265147043943	2H	131768297	131770094	+	Predicted protein
HORVU.MOREX.r3.5HG0425010	4.8954341709859	0.0008287316176193	5H	10832393	10837897	-	5-methyltetrahydropteroyltriglutamate--homocysteine S-methyltransferase (EC 2.1.1.14)
HORVU.MOREX.r3.7HG0747470	5.48869177651869	0.0008451936612626	7H	619420279	619423436	+	Predicted protein
HORVU.MOREX.r3.3HG0249400	5.49394510864008	0.0008486838696804	3H	139643218	139645383	-	Plasma membrane-associated cation-binding protein 1
HORVU.MOREX.r3.5HG0490580	3.85040549407907	0.0008499752426232	5H	476675461	476676438	+	Predicted protein
HORVU.MOREX.r3.5HG0519940	5.49124141591759	0.0008499752426232	5H	549111741	549113029	+	H15 domain-containing protein
HORVU.MOREX.r3.4HG0333030	4.87961709004846	0.0008589331144592	4H	4676410	4677377	+	Dehydrin 13 (Predicted protein)
HORVU.MOREX.r3.4HG0334860	5.45969791170714	0.0009018998935973	4H	9814412	9818756	-	Uncharacterized protein
HORVU.MOREX.r3.6HG0545620	1.99224854935648	0.0009018998935973	6H	16380208	16384058	-	Uncharacterized protein
HORVU.MOREX.r3.1HG0067190	5.47161048556365	0.0009135988181581	1H	437403223	437403955	-	Bowman-Birk serine protease inhibitors family domain-containing protein
HORVU.MOREX.r3.3HG0329570	3.85848299305086	0.0009135988181581	3H	617199839	617200644	+	Metallothionein-like protein
HORVU.MOREX.r3.1HG0073330	5.4369012112085	0.0009541917984499	1H	461973761	461976763	-	E2 ubiquitin-conjugating enzyme (EC 2.3.2.23)
HORVU.MOREX.r3.3HG0324070	5.43112595908198	0.0009649028294909	3H	605061318	605063518	-	Uncharacterized protein
HORVU.MOREX.r3.2HG0113190	5.43101566780026	0.0009879632268108	2H	43264907	43269312	-	UDP-glucuronic acid decarboxylase 1 (EC 4.1.1.35) (UDP-glucuronate decarboxylase 1)
HORVU.MOREX.r3.4HG0335270	5.4194876406165	0.0010119032396911	4H	11193043	11196701	-	Uncharacterized protein
HORVU.MOREX.r3.4HG0370570	-4.84637030903213	0.0010119032396911	4H	304334285	304410388	-	Predicted protein
HORVU.MOREX.r3.4HG0391130	5.43066190088137	0.0010119032396911	4H	495959205	495963504	+	RING-type E3 ubiquitin transferase (EC 2.3.2.27)
HORVU.MOREX.r3.5HG0423300	-4.84637030903213	0.0010119032396911	5H	7750261	7750808	+	Uncharacterized protein
HORVU.MOREX.r3.7HG0653380	5.40692711396931	0.0010160516800549	7H	40683563	40685505	+	Esterase
HORVU.MOREX.r3.7HG0746770	2.21424572070281	0.0010160516800549	7H	618143583	618149090	-	Endoplasmin homolog (Glucose-regulated protein 94 homolog)
HORVU.MOREX.r3.6HG0619360	5.40099072833171	0.0010204993136072	6H	523764750	523768838	+	Predicted protein
HORVU.MOREX.r3.3HG0276570	3.79036883983795	0.0010440182633027	3H	404452286	404456682	-	Isocitrate dehydrogenase [NADP] (EC 1.1.1.42)
HORVU.MOREX.r3.4HG0335800	5.38495371920202	0.0010894728944909	4H	12959372	12965371	+	Lipoxygenase (EC 1.13.11.-)
HORVU.MOREX.r3.4HG0393930	4.79919485850132	0.0010908195622432	4H	515660719	515662599	+	Ubiquitin-like domain-containing protein
HORVU.MOREX.r3.5HG0469820	5.35563216838633	0.0011621870172647	5H	363732109	363735850	+	Coatomer subunit zeta
HORVU.MOREX.r3.1HG0079120	5.36321913984822	0.0011623509362152	1H	483012013	483017803	-	phosphoethanolamine N-methyltransferase (EC 2.1.1.103)
HORVU.MOREX.r3.1HG0059770	4.77765570611089	0.0012003992715639	1H	397878042	397880435	-	NAC-A/B domain-containing protein
HORVU.MOREX.r3.6HG0538250	5.36007721564162	0.0012003992715639	6H	78235	80079	-	SKP1-like protein
HORVU.MOREX.r3.1HG0003140	4.77449069898417	0.0012026226217052	1H	6142234	6145606	+	Predicted protein
HORVU.MOREX.r3.5HG0526180	5.34462287748692	0.0012026226217052	5H	562972162	562974160	+	Predicted protein
HORVU.MOREX.r3.5HG0444080	5.32643784354661	0.0012360480637842	5H	110477799	110478640	-	Predicted protein
HORVU.MOREX.r3.7HG0741050	5.35100446761093	0.0012753608698403	7H	606998324	607000327	+	Predicted protein
HORVU.MOREX.r3.3HG0328170	5.30970617475932	0.001292484935292	3H	614261429	614262155	+	SCP domain-containing protein
HORVU.MOREX.r3.5HG0491740	5.3056274418242	0.0013024805096409	5H	481405558	481407577	+	chitinase (EC 3.2.1.14)
HORVU.MOREX.r3.5HG0510590	4.7437247495669	0.0013031599899081	5H	527021268	527043119	+	Beta-glucosidase
HORVU.MOREX.r3.1HG0021690	5.30394750645713	0.0013199125885067	1H	79601101	79602878	+	Peroxidase (EC 1.11.1.7)
HORVU.MOREX.r3.1HG0024910	4.7299015501709	0.0013199125885067	1H	100324757	100325526	+	Ubiquitin-like domain-containing protein
HORVU.MOREX.r3.1HG0056420	5.29264151185718	0.0013199125885067	1H	376625862	376626931	+	Predicted protein
HORVU.MOREX.r3.3HG0297100	5.28632358151326	0.0013199125885067	3H	527385949	527390369	+	phosphoglycerate mutase (2,3-diphosphoglycerate-independent) (EC 5.4.2.12)
HORVU.MOREX.r3.4HG0337850	5.29356798172924	0.0013199125885067	4H	20111583	20114171	+	Predicted protein
HORVU.MOREX.r3.4HG0396100	-5.95464187825797	0.0013199125885067	4H	530688617	530691997	+	Predicted protein
HORVU.MOREX.r3.5HG0444170	5.28785001791555	0.0013199125885067	5H	110802865	110803710	-	Predicted protein
HORVU.MOREX.r3.5HG0484150	5.30243306324452	0.0013199125885067	5H	446525605	446526769	-	poly(A)-specific ribonuclease (EC 3.1.13.4)
HORVU.MOREX.r3.7HG0657860	5.29577958326107	0.0013199125885067	7H	54112100	54116950	+	H(+)-exporting diphosphatase (EC 7.1.3.1)
HORVU.MOREX.r3.7HG0679520	4.72779769047174	0.0013199125885067	7H	172307063	172308014	-	Predicted protein
HORVU.MOREX.r3.7HG0719360	-2.04697798837723	0.0013199125885067	7H	524095857	524096199	-	ATP synthase subunit 9, mitochondrial (Lipid-binding protein)
HORVU.MOREX.r3.5HG0440090	5.29491333429188	0.0013286566369865	5H	77229070	77231385	-	Ubiquitin-like domain-containing protein
HORVU.MOREX.r3.7HG0710360	3.71375685435075	0.0013286566369865	7H	463157310	463160448	+	E2 ubiquitin-conjugating enzyme (EC 2.3.2.23)
HORVU.MOREX.r3.3HG0295370	5.30800257375545	0.0013290501999152	3H	519405643	519407174	+	Cysteine proteinase inhibitor
HORVU.MOREX.r3.7HG0668880	5.29019991760985	0.0013290501999152	7H	106099377	106100253	+	SCP domain-containing protein
HORVU.MOREX.r3.1HG0067160	5.27702426115609	0.0013501641384173	1H	437250815	437251854	-	Predicted protein
HORVU.MOREX.r3.5HG0472960	5.26931149408149	0.0013501641384173	5H	387362022	387367646	-	phosphoenolpyruvate carboxylase (EC 4.1.1.31)
HORVU.MOREX.r3.2HG0212570	3.71795188373117	0.0013531099462856	2H	652048026	652052197	+	Calreticulin
HORVU.MOREX.r3.3HG0309280	4.70179981687386	0.0014013953165616	3H	569823075	569823884	+	Bifunctional inhibitor/plant lipid transfer protein/seed storage helical domain-containing protein
HORVU.MOREX.r3.5HG0520110	5.28402862845981	0.0014013953165616	5H	549545922	549547277	-	H15 domain-containing protein
HORVU.MOREX.r3.2HG0172050	5.24112723111708	0.0014341894645328	2H	502654339	502658885	+	RRM domain-containing protein
HORVU.MOREX.r3.3HG0300790	-7.3285791342614	0.0014341894645328	3H	542165949	542168558	+	C2H2-type domain-containing protein
HORVU.MOREX.r3.7HG0678040	4.69226560601502	0.0014341894645328	7H	161733798	161735083	-	tricin synthase (EC 2.1.1.175)
HORVU.MOREX.r3.5HG0435850	-3.41924999418456	0.0014454264085501	5H	53258842	53259139	-	Uncharacterized protein
HORVU.MOREX.r3.2HG0126510	3.70075524837998	0.0014471869267792	2H	106357327	106358243	-	Predicted protein
HORVU.MOREX.r3.2HG0172320	5.23503242247372	0.0014471869267792	2H	504482926	504526320	+	Histone H3
HORVU.MOREX.r3.3HG0331020	5.22295389384158	0.0014924170813751	3H	620924000	620925965	-	C3H1-type domain-containing protein
HORVU.MOREX.r3.2HG0204520	3.69490179344872	0.0015177235728994	2H	634391620	634395467	+	Oryzain alpha chain
HORVU.MOREX.r3.3HG0290290	5.21578271241432	0.0015177235728994	3H	495710502	495714856	-	Aspartate aminotransferase (EC 2.6.1.1)
HORVU.MOREX.r3.2HG0209020	5.21268845834326	0.0015408647304037	2H	644692787	644694030	-	Predicted protein
HORVU.MOREX.r3.3HG0242150	3.65911483146829	0.0015742219648178	3H	82738465	82739697	-	Predicted protein
HORVU.MOREX.r3.1HG0065530	2.7943106895469	0.0015996401614794	1H	429151867	429152829	-	Uncharacterized protein
HORVU.MOREX.r3.4HG0389060	5.19463842245579	0.0015996401614794	4H	481971292	481974686	+	mannose-1-phosphate guanylyltransferase (EC 2.7.7.13)
HORVU.MOREX.r3.2HG0207560	5.19936903947027	0.0016172489890201	2H	641756255	641756528	+	Wound induced protein
HORVU.MOREX.r3.4HG0419280	5.26420352251536	0.0016182259562459	4H	610114852	610138648	+	Germin-like protein
HORVU.MOREX.r3.7HG0684090	5.18673054732371	0.0016182259562459	7H	206102536	206105424	-	NTF2 domain-containing protein
HORVU.MOREX.r3.4HG0387520	4.66203583421921	0.0016303778840837	4H	469850246	469854190	-	UDP-glucuronate decarboxylase (EC 4.1.1.35)
HORVU.MOREX.r3.7HG0661210	3.11947065472869	0.0016394983859314	7H	65929136	65929872	+	Histone H3
HORVU.MOREX.r3.2HG0131330	5.18549320884685	0.0016694019709835	2H	140284687	140287920	+	Sugar phosphate transporter domain-containing protein
HORVU.MOREX.r3.5HG0529140	5.17551517354643	0.001671682543442	5H	569199508	569204525	+	Tr-type G domain-containing protein
HORVU.MOREX.r3.4HG0353020	2.94303354249845	0.0016815475348101	4H	117813945	117814436	-	Histone H4
HORVU.MOREX.r3.2HG0191770	5.16133477552683	0.0017017880654817	2H	602712340	602713415	-	AP2/ERF domain-containing protein
HORVU.MOREX.r3.4HG0384600	5.1636548044725	0.0017017880654817	4H	449840461	449843487	+	RanBD1 domain-containing protein
HORVU.MOREX.r3.2HG0165860	3.08431364438882	0.0017155638360884	2H	458568036	458570233	+	ATP synthase subunit d, mitochondrial
HORVU.MOREX.r3.3HG0285730	4.64037201944796	0.0017191044827956	3H	466859367	466863054	-	Hyaluronan/mRNA-binding protein domain-containing protein
HORVU.MOREX.r3.4HG0378160	5.17659262472761	0.0017191044827956	4H	388113959	388116144	+	Ribosomal protein L19
HORVU.MOREX.r3.2HG0215280	5.1521684459155	0.001735894635608	2H	658137896	658139373	-	Peroxidase (EC 1.11.1.7)
HORVU.MOREX.r3.7HG0644470	5.14907691237464	0.0017667736687868	7H	18692218	18693117	+	Histone H3
HORVU.MOREX.r3.4HG0408300	3.63137564586532	0.0017960391303318	4H	581807913	581810860	-	Uncharacterized protein
HORVU.MOREX.r3.4HG0334800	5.12868754426717	0.0018297415506089	4H	9690089	9693510	-	CHCH domain containing protein, expressed (Predicted protein)
HORVU.MOREX.r3.2HG0112820	3.61281011657369	0.0018299796173197	2H	42028290	42030928	+	Ribosomal protein L19
HORVU.MOREX.r3.6HG0614350	5.11626243555094	0.0018858405967107	6H	499887382	499888530	-	Predicted protein
HORVU.MOREX.r3.5HG0517170	5.11050446286843	0.001910725279931	5H	543008073	543011938	-	FAS1 domain-containing protein
HORVU.MOREX.r3.3HG0327840	5.12313572265131	0.0019372526083926	3H	613665787	613666343	-	Uncharacterized protein
HORVU.MOREX.r3.5HG0468290	5.11115509164859	0.0019579610117545	5H	350829397	350834230	-	Polyadenylate-binding protein (PABP)
HORVU.MOREX.r3.5HG0480100	4.56981193367954	0.0019768191000507	5H	429807987	429812084	-	Uncharacterized protein
HORVU.MOREX.r3.6HG0569040	4.57229176662383	0.0019768191000507	6H	116825259	116832731	+	Predicted protein
HORVU.MOREX.r3.1HG0004290	5.1377475722783	0.0020007391399751	1H	9112787	9113012	+	Subtilisin-chymotrypsin inhibitor-2A
HORVU.MOREX.r3.1HG0063360	5.09047749926119	0.002008326930562	1H	418191923	418194960	+	BI1-like protein
HORVU.MOREX.r3.4HG0336870	3.08212127353025	0.0020861562507504	4H	16637082	16638916	-	Glutathione S-transferase 3, mitochondrial (EC 4.4.1.20) (Glutathione peroxidase MGST3) (LTC4 synthase MGST3)
HORVU.MOREX.r3.3HG0328610	-2.15207730762669	0.0021020867134763	3H	615122273	615122991	+	Uncharacterized protein
HORVU.MOREX.r3.2HG0149410	5.06087203992029	0.0021557644932513	2H	312614559	312623999	-	Thioredoxin
HORVU.MOREX.r3.5HG0508050	5.06646158520386	0.0021557644932513	5H	520568035	520572383	+	Nuclear transcription factor Y subunit
HORVU.MOREX.r3.3HG0257920	4.54003965874114	0.0021566249469837	3H	213145811	213165369	+	EF-hand domain-containing protein
HORVU.MOREX.r3.4HG0412450	5.06728756965348	0.0021566249469837	4H	594479548	594482003	-	UBC core domain-containing protein
HORVU.MOREX.r3.3HG0245400	5.05307497134646	0.0021978398522465	3H	105029113	105032934	-	Predicted protein
HORVU.MOREX.r3.2HG0213970	5.07803868897479	0.002241577371227	2H	655277097	655278963	+	poly(A)-specific ribonuclease (EC 3.1.13.4)
HORVU.MOREX.r3.1HG0090780	5.01988001985131	0.002371346952936	1H	505778030	505781621	-	Ketol-acid reductoisomerase (EC 1.1.1.86) (Acetohydroxy-acid reductoisomerase) (Alpha-keto-beta-hydroxylacyl reductoisomerase)
HORVU.MOREX.r3.2HG0124810	5.02225204974168	0.002371346952936	2H	96880946	96886572	+	Alanine aminotransferase 2 (EC 2.6.1.2)
HORVU.MOREX.r3.2HG0215300	5.01732768882438	0.002371346952936	2H	658182271	658183948	-	Peroxidase (EC 1.11.1.7)
HORVU.MOREX.r3.5HG0478050	5.02020199206508	0.002371346952936	5H	416344645	416348883	+	Nucleobase-ascorbate transporter 6
HORVU.MOREX.r3.6HG0565890	2.21126748214052	0.002371346952936	6H	97005272	97008691	-	Predicted protein
HORVU.MOREX.r3.2HG0095670	5.01290030304178	0.0023933243887866	2H	580198	583787	-	Cysteine synthase (EC 2.5.1.47)
HORVU.MOREX.r3.4HG0387430	4.50510643170076	0.0024069400623798	4H	469618768	469622428	+	RRM domain-containing protein
HORVU.MOREX.r3.5HG0507940	5.01240563876679	0.0024173965902182	5H	520369865	520373657	-	Uncharacterized protein
HORVU.MOREX.r3.1HG0057900	5.00492103878004	0.0024383031529517	1H	386093847	386095818	+	Uncharacterized protein
HORVU.MOREX.r3.5HG0483810	5.00270355429705	0.0024383031529517	5H	444180988	444183073	-	Predicted protein
HORVU.MOREX.r3.5HG0509900	5.01144336512167	0.0024383031529517	5H	525238006	525241137	-	Predicted protein
HORVU.MOREX.r3.3HG0280920	5.03343787227265	0.0024591038011308	3H	438399894	438400756	+	Uncharacterized protein
HORVU.MOREX.r3.5HG0454740	4.99504140432213	0.0024591038011308	5H	232716700	232718924	+	V-type proton ATPase proteolipid subunit
HORVU.MOREX.r3.6HG0552800	4.51410619729804	0.0024591038011308	6H	34685668	34686448	+	Histone H2B
HORVU.MOREX.r3.4HG0336270	4.99263636618811	0.002465557282105	4H	13874211	13878361	-	4-hydroxy-7-methoxy-3-oxo-3,4-dihydro-2H-1,4-benzoxazin-2-yl glucosidebeta-D-glucosidase (EC 3.2.1.182)
HORVU.MOREX.r3.4HG0387870	4.51393073952952	0.002465557282105	4H	471896970	471899346	-	Heat shock cognate 70 kDa protein
HORVU.MOREX.r3.1HG0000950	4.99752983355962	0.0024998464911331	1H	2262515	2269336	-	Mannan endo-1,4-beta-mannosidase
HORVU.MOREX.r3.1HG0012520	5.01750683792694	0.0025108918324595	1H	31110908	31111133	-	Subtilisin-chymotrypsin inhibitor-2A
HORVU.MOREX.r3.4HG0341070	4.98142872588626	0.0025252832422221	4H	32425345	32426402	-	Auxin-repressed protein
HORVU.MOREX.r3.3HG0223070	-2.10837865132336	0.0025363042251767	3H	9390829	9391547	+	Uncharacterized protein
HORVU.MOREX.r3.3HG0328510	-2.10837865132336	0.0025363042251767	3H	615065975	615066692	+	Uncharacterized protein
HORVU.MOREX.r3.3HG0302810	-5.17290076420153	0.0025729740549981	3H	550658248	550660768	-	Heat shock cognate 70 kDa protein
HORVU.MOREX.r3.2HG0168950	4.96803861613269	0.0025842805697093	2H	479627910	479631053	-	SLL1 protein
HORVU.MOREX.r3.7HG0726010	4.48226327411547	0.0025907218333407	7H	560252262	560255108	-	Peptidyl-prolyl cis-trans isomerase (PPIase) (EC 5.2.1.8)
HORVU.MOREX.r3.6HG0553150	3.50450843950478	0.002641551064777	6H	35517131	35519594	+	Ubiquitin-like domain-containing protein
HORVU.MOREX.r3.1HG0083730	4.95614567833	0.0026526868213408	1H	493176743	493177306	+	Bifunctional inhibitor/plant lipid transfer protein/seed storage helical domain-containing protein
HORVU.MOREX.r3.1HG0052220	4.95078187327869	0.0027016074271093	1H	347981186	348000255	+	Non-lysosomal glucosylceramidase (NLGase) (EC 3.2.1.45)
HORVU.MOREX.r3.3HG0255970	4.95047482729921	0.0027016074271093	3H	193305982	193309522	-	Predicted protein
HORVU.MOREX.r3.3HG0307490	4.94604728164746	0.0027016074271093	3H	564864758	564866328	-	Acyl-[acyl-carrier-protein] desaturase
HORVU.MOREX.r3.7HG0691750	4.94945696272961	0.0027016074271093	7H	280564268	280579858	-	14-3-3D
HORVU.MOREX.r3.5HG0435440	-2.91068345786413	0.0027224256138106	5H	53040602	53040899	-	Uncharacterized protein
HORVU.MOREX.r3.1HG0017720	4.45310257774464	0.0027340556713216	1H	56470653	56471993	-	glutathione transferase (EC 2.5.1.18)
HORVU.MOREX.r3.7HG0735200	4.44681474365635	0.0027340556713216	7H	591920730	591925640	+	Uncharacterized protein
HORVU.MOREX.r3.5HG0481240	4.94087052960655	0.0027354883329801	5H	435142876	435146202	-	AP2/ERF domain-containing protein
HORVU.MOREX.r3.5HG0435610	-4.43218345420126	0.002755418285959	5H	53119179	53119476	-	Uncharacterized protein
HORVU.MOREX.r3.5HG0524560	4.93753198507877	0.002757510684156	5H	559483253	559489036	-	Methylenetetrahydrofolate reductase
HORVU.MOREX.r3.3HG0276900	4.93362141195183	0.0027715470795902	3H	407187025	407202011	-	E2 ubiquitin-conjugating enzyme (EC 2.3.2.23)
HORVU.MOREX.r3.4HG0332160	4.92500697839272	0.0027920711008916	4H	2595679	2599173	-	Ribosomal protein
HORVU.MOREX.r3.6HG0567160	4.92663176288297	0.0027920711008916	6H	106789629	106793022	+	Tubulin beta chain
HORVU.MOREX.r3.5HG0473560	4.94174297118995	0.002799654786527	5H	390645598	390646355	-	Predicted protein
HORVU.MOREX.r3.1HG0075620	4.42683004753304	0.0028440648404845	1H	472883000	472885062	-	Inhibitor I9 domain-containing protein
HORVU.MOREX.r3.1HG0093420	4.91755563422848	0.0028440648404845	1H	511553045	511557115	-	Thioredoxin domain-containing protein
HORVU.MOREX.r3.2HG0203510	4.91505531302479	0.0028440648404845	2H	631590953	631595924	-	Protein TIFY (Jasmonate ZIM domain-containing protein)
HORVU.MOREX.r3.7HG0645350	4.94632950483999	0.0028440648404845	7H	20552561	20556086	-	transketolase (EC 2.2.1.1)
HORVU.MOREX.r3.7HG0640180	4.90752240716576	0.0028841741509493	7H	10453473	10455780	-	Ozone-responsive stress-related protein
HORVU.MOREX.r3.1HG0068140	4.90899243878991	0.00291272153196	1H	441931969	441933902	-	Protein translation factor SUI1 homolog (Protein GOS2) (Protein eIF1) (Translation initiation factor 1)
HORVU.MOREX.r3.1HG0025050	4.90373925212302	0.002956264785832	1H	101077350	101078820	+	Peroxidase (EC 1.11.1.7)
HORVU.MOREX.r3.6HG0628320	4.9105032284507	0.003012129999553	6H	549695562	549696597	-	Germin-like protein
HORVU.MOREX.r3.7HG0726690	4.88580666134505	0.0030620427723066	7H	563635587	563640424	+	Delta-aminolevulinic acid dehydratase (EC 4.2.1.24)
HORVU.MOREX.r3.3HG0312010	4.3947102248826	0.0030633958795393	3H	579344136	579347246	-	Predicted protein
HORVU.MOREX.r3.3HG0230590	4.40390729729307	0.0031071723583471	3H	23345084	23348486	+	Triosephosphate isomerase, cytosolic (EC 5.3.1.1)
HORVU.MOREX.r3.7HG0728480	4.87696592821588	0.0031209497205693	7H	570673212	570675041	-	Peroxidase (EC 1.11.1.7)
HORVU.MOREX.r3.3HG0275990	4.87150149978261	0.0031418149836595	3H	400025936	400029356	+	Malate dehydrogenase (EC 1.1.1.37)
HORVU.MOREX.r3.6HG0554680	4.86678561692982	0.0032380676040521	6H	41076841	41081974	+	Heme O synthase
HORVU.MOREX.r3.2HG0178520	4.85893744913499	0.0032430879119819	2H	544526690	544530487	-	Endoglucanase (EC 3.2.1.4)
HORVU.MOREX.r3.1HG0080720	4.391259838808	0.0032562118074832	1H	486791661	486795282	+	Predicted protein
HORVU.MOREX.r3.3HG0287730	4.39259689439542	0.003305472526724	3H	478735846	478740983	-	Glutamate carboxypeptidase 2
HORVU.MOREX.r3.2HG0167500	4.85526127396426	0.0033085994072191	2H	471627573	471629150	+	Extensin
HORVU.MOREX.r3.7HG0738560	4.85019686449794	0.0033085994072191	7H	600344727	600345487	-	Bifunctional inhibitor/plant lipid transfer protein/seed storage helical domain-containing protein
HORVU.MOREX.r3.7HG0658840	4.84981342189805	0.0033290966845211	7H	58141167	58141900	+	Histone H2A
HORVU.MOREX.r3.6HG0630670	3.44022665452181	0.003338026858926	6H	555567194	555570503	+	Fibrillarin
HORVU.MOREX.r3.2HG0182400	4.83385592958943	0.0034935802972872	2H	561856197	561858339	+	Uncharacterized protein
HORVU.MOREX.r3.3HG0295830	4.34860372859014	0.0035021922455923	3H	521719088	521723410	+	Leucine-rich repeat-containing N-terminal plant-type domain-containing protein
HORVU.MOREX.r3.7HG0738450	4.83916833184042	0.0035089406548076	7H	599993533	599994301	-	Bifunctional inhibitor/plant lipid transfer protein/seed storage helical domain-containing protein
HORVU.MOREX.r3.5HG0441860	2.56702717880599	0.003511140368955	5H	91777220	91781821	-	Predicted protein
HORVU.MOREX.r3.7HG0635170	4.35161708600816	0.003518144193066	7H	2583657	2587436	-	Sucrose:sucrose 1-fructosyltransferase (EC 2.4.1.99)
HORVU.MOREX.r3.7HG0730530	4.83637704682994	0.003518144193066	7H	578444418	578445676	-	HMA domain-containing protein
HORVU.MOREX.r3.3HG0289030	4.81701878009072	0.0035212058075173	3H	487537080	487537807	-	Predicted protein
HORVU.MOREX.r3.6HG0623240	4.81530981550048	0.0035381967214832	6H	536078570	536081963	-	Serine incorporator
HORVU.MOREX.r3.5HG0524820	4.81329743405718	0.0035499541765806	5H	560069650	560072120	-	Predicted protein
HORVU.MOREX.r3.2HG0180580	4.80910505805066	0.0036301543544405	2H	554285925	554288453	+	Proliferating cell nuclear antigen
HORVU.MOREX.r3.2HG0160560	-3.15445442815625	0.0036698559512879	2H	418053311	418056464	-	peptidylprolyl isomerase (EC 5.2.1.8)
HORVU.MOREX.r3.1HG0054530	4.80012895397936	0.0036831157023943	1H	364793629	364798249	+	Major facilitator superfamily (MFS) profile domain-containing protein
HORVU.MOREX.r3.5HG0457850	4.79415367538098	0.0036831157023943	5H	263268316	263270827	-	Predicted protein
HORVU.MOREX.r3.6HG0627980	4.79324988236352	0.0036831157023943	6H	548281152	548286294	-	Phosphate transporter
HORVU.MOREX.r3.7HG0705190	4.79524189822049	0.0036831157023943	7H	430228689	430231040	+	fructokinase (EC 2.7.1.4)
HORVU.MOREX.r3.7HG0732170	4.84630980464578	0.0037813867972354	7H	583793202	583793880	-	EF-hand domain-containing protein
HORVU.MOREX.r3.7HG0686790	4.78724316340884	0.0037837485891712	7H	226677684	226683643	+	Predicted protein
HORVU.MOREX.r3.4HG0352010	4.78678625096264	0.0037858221061841	4H	112253878	112256431	+	Predicted protein
HORVU.MOREX.r3.2HG0121700	4.77950594900131	0.0038015484516776	2H	78530088	78530869	+	NADH-ubiquinone oxidoreductase 21kDa subunit N-terminal domain-containing protein
HORVU.MOREX.r3.3HG0290880	4.77771311692103	0.0038015484516776	3H	497986641	497988501	-	UDP-arabinopyranose mutase (EC 5.4.99.30)
HORVU.MOREX.r3.5HG0502860	4.77958025292818	0.0038015484516776	5H	510245438	510245952	-	Histone H4
HORVU.MOREX.r3.2HG0137190	4.79321584209399	0.0038035944814374	2H	185333512	185336044	-	Phenylalanine ammonia-lyase (EC 4.3.1.24)
HORVU.MOREX.r3.1HG0030590	4.77285450124167	0.0038257976541171	1H	149483150	149487001	-	Mitochondrial dicarboxylate/tricarboxylate transporter DTC
HORVU.MOREX.r3.4HG0401530	4.76548929225347	0.0038938306439573	4H	556146136	556150747	-	YTH domain-containing family protein
HORVU.MOREX.r3.1HG0080760	3.41232997557075	0.0039001478117918	1H	486915575	486916235	+	Histone H3
HORVU.MOREX.r3.1HG0089180	4.76710397490208	0.0039001478117918	1H	502624016	502626375	-	Cold acclimation WCOR413-like protein gamma form (Predicted protein)
HORVU.MOREX.r3.1HG0095210	4.76204858177211	0.0039001478117918	1H	515748043	515751733	-	Nucleoside diphosphate kinase (EC 2.7.4.6)
HORVU.MOREX.r3.6HG0601660	4.76796042154278	0.0039001478117918	6H	418003211	418005921	+	S-adenosylmethionine synthase (EC 2.5.1.6)
HORVU.MOREX.r3.3HG0309210	4.76013313890554	0.0039004870554728	3H	569641209	569649865	-	Obg-like ATPase 1
HORVU.MOREX.r3.7HG0662210	4.75983774975548	0.0039005776750178	7H	69097130	69100963	-	T-complex protein 1 subunit delta
HORVU.MOREX.r3.4HG0385270	3.36770639779765	0.0039428778736788	4H	454643412	454646133	-	Elongation factor 1-alpha
HORVU.MOREX.r3.5HG0442670	4.74601942638852	0.0040239246349059	5H	97926458	97930589	+	ATP citrate synthase (EC 2.3.3.8)
HORVU.MOREX.r3.6HG0589360	4.74667970380805	0.0040239246349059	6H	315174639	315179113	-	Uncharacterized protein
HORVU.MOREX.r3.5HG0509760	4.75324964863786	0.0040268658431633	5H	524804342	524806935	-	Auxin-responsive protein
HORVU.MOREX.r3.3HG0245120	4.74364335743935	0.0040319818908629	3H	103009694	103011097	-	Fruit bromelain
HORVU.MOREX.r3.6HG0570470	3.35611804959404	0.0040334596217821	6H	127314456	127316546	-	Fiber protein Fb15
HORVU.MOREX.r3.1HG0061580	4.72981226840904	0.0041704713289648	1H	408176045	408176623	-	Metallothionein-like protein
HORVU.MOREX.r3.5HG0433440	4.7639319472626	0.0041741445661436	5H	44352923	44354166	-	Auxin-responsive protein
HORVU.MOREX.r3.1HG0021340	4.72764872069857	0.0041790041973165	1H	77796733	77797815	+	glutathione transferase (EC 2.5.1.18)
HORVU.MOREX.r3.1HG0076510	4.26263109184289	0.0041790041973165	1H	475070714	475073001	+	Phloem sap 13 kDa protein 1
HORVU.MOREX.r3.2HG0131170	4.73313924314764	0.0041790041973165	2H	138379017	138381267	-	Major facilitator superfamily (MFS) profile domain-containing protein
HORVU.MOREX.r3.2HG0188290	4.77108229450177	0.0041790041973165	2H	591323808	591326079	-	Uncharacterized protein
HORVU.MOREX.r3.4HG0368710	4.75120580088324	0.0041790041973165	4H	271139166	271142818	-	ADP-ribosylation factor-like protein 5
HORVU.MOREX.r3.5HG0424560	4.72495516665908	0.0041790041973165	5H	9809558	9811573	-	glutathione transferase (EC 2.5.1.18)
HORVU.MOREX.r3.5HG0473580	4.73581058060083	0.0041790041973165	5H	390735220	390735948	+	Predicted protein
HORVU.MOREX.r3.6HG0591170	4.72291299186088	0.0041790041973165	6H	331938379	331939524	-	High-affinity nitrate transporter
HORVU.MOREX.r3.6HG0596040	4.26244023745848	0.0041790041973165	6H	373430223	373435992	+	Succinate--CoA ligase [ADP-forming] subunit beta, mitochondrial (EC 6.2.1.5) (Succinyl-CoA synthetase beta chain) (SCS-beta)
HORVU.MOREX.r3.7HG0713280	4.7316133864442	0.0041790041973165	7H	485981576	485985164	+	Peroxidase (EC 1.11.1.7)
HORVU.MOREX.r3.7HG0717010	4.71930506643225	0.0041790041973165	7H	506043581	506046440	-	Dolichyl-diphosphooligosaccharide-protein glycosyltransferase subunit OST5
HORVU.MOREX.r3.1HG0069570	4.72069710744947	0.0041860672182092	1H	447789530	447792962	+	Tubulin beta chain
HORVU.MOREX.r3.5HG0514980	4.7158562110928	0.004270621007152	5H	538577806	538582852	+	Inosine-5'-monophosphate dehydrogenase (IMP dehydrogenase) (IMPD) (IMPDH) (EC 1.1.1.205)
HORVU.MOREX.r3.1HG0002510	4.24895100802494	0.0043080351133551	1H	5095542	5109506	-	methionine S-methyltransferase (EC 2.1.1.12)
HORVU.MOREX.r3.4HG0404220	4.70671836876093	0.0043080351133551	4H	566844378	566848026	-	Nuclear transcription factor Y subunit
HORVU.MOREX.r3.5HG0464780	4.71931796231241	0.0043080351133551	5H	326059296	326060146	+	HIG1 domain-containing protein
HORVU.MOREX.r3.2HG0141620	4.71868554262194	0.0043155991772853	2H	218840442	218842835	+	Autophagy-related protein
HORVU.MOREX.r3.3HG0280990	4.70033362283387	0.0043155991772853	3H	439197470	439199526	+	Predicted protein
HORVU.MOREX.r3.6HG0616530	4.71418231995997	0.0043155991772853	6H	512845956	512847885	+	Predicted protein
HORVU.MOREX.r3.7HG0657330	4.69908422544654	0.0043155991772853	7H	52921021	52927507	-	Uncharacterized protein
HORVU.MOREX.r3.2HG0132170	4.70807963792612	0.0043264859998958	2H	146410505	146413876	-	Tubulin alpha chain
HORVU.MOREX.r3.5HG0500680	4.70504324768904	0.0043264859998958	5H	505009906	505013279	-	Acyl carrier protein
HORVU.MOREX.r3.2HG0127330	4.69802543138332	0.0043282337780248	2H	111116994	111117792	+	NADH-ubiquinone reductase complex 1 MLRQ subunit
HORVU.MOREX.r3.4HG0415030	4.69459763224634	0.0043282337780248	4H	600781576	600784976	+	Stem 28 kDa glycoprotein
HORVU.MOREX.r3.5HG0444140	4.70304097935318	0.0043282337780248	5H	110687411	110688036	-	Predicted protein
HORVU.MOREX.r3.6HG0600860	4.74077140046182	0.0043282337780248	6H	412481195	412485687	-	Uncharacterized protein
HORVU.MOREX.r3.4HG0418810	4.78797568952351	0.0043289501020365	4H	609825260	609826297	+	Germin-like protein
HORVU.MOREX.r3.5HG0504050	4.69079288874301	0.0043289501020365	5H	512183108	512184647	-	Cupin type-1 domain-containing protein
HORVU.MOREX.r3.2HG0180820	4.68719952182073	0.0043358247652675	2H	555122624	555124540	+	Ammonium transporter
HORVU.MOREX.r3.3HG0287660	4.69285210849572	0.0043358247652675	3H	478146250	478147168	-	Uncharacterized protein
HORVU.MOREX.r3.7HG0640780	4.68693384236947	0.0043358247652675	7H	11551527	11555735	-	GDT1 family protein
HORVU.MOREX.r3.1HG0000070	4.6918820822977	0.0043430210799538	1H	146606	148562	+	Predicted protein
HORVU.MOREX.r3.2HG0101960	4.70065154390721	0.0043719603823399	2H	14048433	14050464	-	Uncharacterized protein
HORVU.MOREX.r3.4HG0413890	4.68175605160784	0.0043719603823399	4H	598004986	598007214	+	Predicted protein
HORVU.MOREX.r3.6HG0539570	4.6838001654164	0.0043719603823399	6H	3688158	3693136	-	Protein disulfide isomerase-like 1-4 (EC 5.3.4.1)
HORVU.MOREX.r3.1HG0056630	4.74566687424887	0.0043730885563458	1H	378714725	378716942	+	Uncharacterized protein
HORVU.MOREX.r3.7HG0643670	4.69819815777159	0.004426449816626	7H	17125156	17126546	+	Peroxidase (EC 1.11.1.7)
HORVU.MOREX.r3.7HG0691650	4.68232827988865	0.004426449816626	7H	278955754	278959927	+	G3BP-like protein
HORVU.MOREX.r3.2HG0122600	4.70715627701868	0.0044574084381682	2H	82717859	82718732	-	Uncharacterized protein
HORVU.MOREX.r3.2HG0145600	4.67646003841048	0.0044656741928197	2H	264254571	264259668	+	NADH dehydrogenase [ubiquinone] flavoprotein 1, mitochondrial (EC 7.1.1.2)
HORVU.MOREX.r3.2HG0165020	4.66601143938867	0.0045115965543188	2H	452103508	452104948	-	Predicted protein
HORVU.MOREX.r3.5HG0447330	4.66317861046386	0.0045193205819254	5H	138747769	138749228	-	Uncharacterized protein
HORVU.MOREX.r3.6HG0540760	4.66777607050843	0.0045386364092367	6H	6812130	6815709	-	Uncharacterized protein
HORVU.MOREX.r3.6HG0576010	4.66444544472674	0.004545362214759	6H	170242278	170246119	-	Protein kinase domain-containing protein
HORVU.MOREX.r3.2HG0124930	4.65604773493259	0.004580322814268	2H	97897998	97901926	+	Predicted protein
HORVU.MOREX.r3.5HG0504790	4.65577832299126	0.004580322814268	5H	513960029	513962357	-	Uncharacterized protein
HORVU.MOREX.r3.7HG0656250	4.67081952557428	0.0046108329041104	7H	49242261	49243230	+	Proteasome subunit alpha type
HORVU.MOREX.r3.4HG0345760	4.65691242170266	0.0046346103897969	4H	63062290	63065458	+	Alcohol dehydrogenase 1 (EC 1.1.1.1)
HORVU.MOREX.r3.5HG0474540	4.65286388882054	0.0046412410709908	5H	397161661	397165674	+	Translocon Sec61/SecY plug domain-containing protein
HORVU.MOREX.r3.2HG0142030	4.65058592398971	0.0046978113771921	2H	222818047	222821597	+	Thioredoxin domain-containing protein
HORVU.MOREX.r3.2HG0157340	4.65537201830396	0.0047276974968283	2H	384670468	384671520	-	Predicted protein
HORVU.MOREX.r3.3HG0234800	4.64136842184504	0.0047707614979569	3H	37278164	37281729	+	Predicted protein
HORVU.MOREX.r3.1HG0067700	4.63821611701641	0.0047797313962958	1H	439768369	439771977	+	NAD(P)H dehydrogenase (quinone) (EC 1.6.5.2)
HORVU.MOREX.r3.4HG0331940	4.63365811781004	0.0047797313962958	4H	2005768	2010537	-	Predicted protein
HORVU.MOREX.r3.5HG0493070	4.63405987485028	0.0047797313962958	5H	485079657	485082076	-	peptidylprolyl isomerase (EC 5.2.1.8)
HORVU.MOREX.r3.3HG0295880	4.63029169251097	0.0048043839756938	3H	521793528	521798023	+	EF-hand domain-containing protein
HORVU.MOREX.r3.1HG0028380	-3.92068500780058	0.0048127737471964	1H	132097517	132097814	-	Uncharacterized protein
HORVU.MOREX.r3.5HG0499760	4.18509333431454	0.0048127737471964	5H	502770191	502773185	-	Predicted protein
HORVU.MOREX.r3.6HG0571770	4.62806504530158	0.0048127737471964	6H	136699831	136702050	-	Glycine cleavage system H protein
HORVU.MOREX.r3.7HG0636020	4.62586222380195	0.0048127737471964	7H	3843187	3846665	-	Mitochondrial pyruvate carrier
HORVU.MOREX.r3.2HG0157170	4.62274123222117	0.0048334706453117	2H	383317233	383318268	+	Dirigent protein
HORVU.MOREX.r3.2HG0207480	4.62550812830636	0.0048334706453117	2H	641708440	641708713	+	Wound-responsive family protein
HORVU.MOREX.r3.3HG0308560	4.62748581288382	0.0048717250821028	3H	567530884	567531103	-	Uncharacterized protein
HORVU.MOREX.r3.2HG0163590	4.62038280360918	0.0048734168116467	2H	438669348	438673095	-	Membrane-anchored ubiquitin-fold protein
HORVU.MOREX.r3.3HG0256390	3.29410147836147	0.0048734168116467	3H	197288465	197291269	+	26S proteasome complex subunit SEM1
HORVU.MOREX.r3.5HG0534850	3.26893743753131	0.0048734168116467	5H	580803319	580807813	-	PCI domain-containing protein
HORVU.MOREX.r3.6HG0613170	4.62773869881091	0.0048734168116467	6H	494738356	494739533	+	Endoplasmic reticulum transmembrane protein
HORVU.MOREX.r3.3HG0304420	4.66190355420007	0.0048804464930868	3H	555827764	555828450	-	Histone H4
HORVU.MOREX.r3.3HG0294710	4.17312576035045	0.0048922756858805	3H	515113616	515116108	-	Protein translation factor SUI1 homolog (Protein GOS2) (Protein eIF1) (Translation initiation factor 1)
HORVU.MOREX.r3.5HG0486120	4.6381519079707	0.0049509844017112	5H	458119247	458125370	-	Predicted protein
HORVU.MOREX.r3.1HG0067070	4.67364296553715	0.005002299640106	1H	436897008	436897583	-	Predicted protein
HORVU.MOREX.r3.2HG0100900	4.60101370838358	0.0050599424059631	2H	12218909	12233312	-	Phosphoglycerate mutase-like protein 1
HORVU.MOREX.r3.5HG0509820	4.16372509968147	0.0050599424059631	5H	525053717	525057246	-	sulfate adenylyltransferase (EC 2.7.7.4)
HORVU.MOREX.r3.1HG0090930	4.60412232591975	0.0051471449406668	1H	506143519	506148269	-	Malate dehydrogenase (EC 1.1.1.37)
HORVU.MOREX.r3.5HG0436270	-3.92546281863877	0.0051471449406668	5H	53493136	53493514	+	Protein TAR1
HORVU.MOREX.r3.1HG0056620	4.6142606398613	0.0051812049117869	1H	378522805	378524551	-	Uncharacterized protein
HORVU.MOREX.r3.5HG0499580	4.58361724886868	0.0052165971202768	5H	502373871	502377799	-	Predicted protein
HORVU.MOREX.r3.4HG0384790	4.58401855522718	0.0052274584054116	4H	450877564	450881355	-	Asparagine synthetase [glutamine-hydrolyzing] (EC 6.3.5.4)
HORVU.MOREX.r3.6HG0626440	4.59361276297098	0.005278736489148	6H	544368258	544374265	+	betaine-aldehyde dehydrogenase (EC 1.2.1.8)
HORVU.MOREX.r3.2HG0113700	4.57699910222658	0.0053240449177622	2H	44837497	44839462	-	Stress-related protein
HORVU.MOREX.r3.5HG0424290	4.5665064657178	0.0054852694659093	5H	9000061	9004243	-	Cysteine synthase (EC 2.5.1.47)
HORVU.MOREX.r3.6HG0559410	4.56336722911936	0.0054852694659093	6H	65557975	65561037	+	protein-serine/threonine phosphatase (EC 3.1.3.16)
HORVU.MOREX.r3.2HG0189940	4.58055812444713	0.0055149807158643	2H	597270628	597271149	-	Histone H4
HORVU.MOREX.r3.5HG0486330	-1.95514377796571	0.0055149807158643	5H	459303503	459305275	+	Predicted protein
HORVU.MOREX.r3.5HG0529600	4.56280573496554	0.0055174801332755	5H	570610167	570612067	-	H(+)/Pi cotransporter
HORVU.MOREX.r3.4HG0397090	4.55403383869411	0.005559684297369	4H	536752687	536753312	-	Predicted protein
HORVU.MOREX.r3.3HG0315280	4.56035724453557	0.0055790544219499	3H	587326212	587327839	+	Peptidase A1 domain-containing protein
HORVU.MOREX.r3.6HG0582870	4.56423258392866	0.0055836593028813	6H	235903929	235904154	-	Uncharacterized protein
HORVU.MOREX.r3.3HG0237710	-7.16011655789326	0.0055849303304901	3H	53711174	53711919	+	Predicted protein
HORVU.MOREX.r3.7HG0719350	-2.49202639596808	0.0055849303304901	7H	524087521	524088001	+	H(+)-transporting two-sector ATPase (EC 7.1.2.2) (Mitochondrial protein YMF19)
HORVU.MOREX.r3.5HG0517500	4.57737205189162	0.0056066321730937	5H	543843426	543848031	-	E2 ubiquitin-conjugating enzyme (EC 2.3.2.23)
HORVU.MOREX.r3.4HG0377890	4.54666952325234	0.0056307523212636	4H	382826191	382833315	-	Nuclear/nucleolar GTPase 2
HORVU.MOREX.r3.6HG0604310	4.55445925807841	0.0056307523212636	6H	443510980	443511952	-	Predicted protein
HORVU.MOREX.r3.1HG0007740	4.54314016064472	0.0056723406974422	1H	16287096	16287824	-	Bowman-Birk serine protease inhibitors family domain-containing protein
HORVU.MOREX.r3.1HG0076700	4.54034031522265	0.0056865345629692	1H	475931637	475933038	-	Peroxidase (EC 1.11.1.7)
HORVU.MOREX.r3.2HG0119860	4.5359581401312	0.0056865345629692	2H	68961327	68964092	-	10 kDa chaperonin
HORVU.MOREX.r3.3HG0253950	4.54476139529461	0.0056865345629692	3H	176118363	176119263	-	Predicted protein
HORVU.MOREX.r3.3HG0296260	4.11017535478359	0.0056865345629692	3H	523226436	523229362	+	ADP-ribosylation factor
HORVU.MOREX.r3.4HG0379100	4.5378521943785	0.0056865345629692	4H	398738564	398742077	+	hydroxyacylglutathione hydrolase (EC 3.1.2.6) (Glyoxalase II)
HORVU.MOREX.r3.4HG0382720	4.55900144168557	0.0056865345629692	4H	431887220	431888411	+	UspA domain-containing protein
HORVU.MOREX.r3.5HG0472810	4.55420713222515	0.0057055902284976	5H	386000569	386002068	-	Uncharacterized protein
HORVU.MOREX.r3.1HG0018190	4.52785776488644	0.0057643709713589	1H	58299923	58304156	+	Aspartic proteinase
HORVU.MOREX.r3.7HG0731110	4.53043760331159	0.0057643709713589	7H	579753732	579754601	+	Histone H3
HORVU.MOREX.r3.4HG0355880	4.53010604454713	0.0057651048016257	4H	142523211	142524967	-	Predicted protein
HORVU.MOREX.r3.7HG0742760	4.52802390126641	0.0057653546303496	7H	610172732	610175834	-	Ubiquitin-like domain-containing protein
HORVU.MOREX.r3.5HG0525980	4.5250952630196	0.0057705596984878	5H	562645430	562650440	+	Dihydrolipoamide acetyltransferase component of pyruvate dehydrogenase complex (EC 2.3.1.-)
HORVU.MOREX.r3.3HG0282600	4.09998320489136	0.0057725664523248	3H	449054383	449057029	-	GDSL esterase/lipase
HORVU.MOREX.r3.2HG0194650	4.54558014991725	0.0058269166767135	2H	610680354	610682886	+	Autophagy-related protein
HORVU.MOREX.r3.7HG0668730	4.5201395489921	0.0058269166767135	7H	105517340	105523132	-	Pyrophosphate--fructose 6-phosphate 1-phosphotransferase subunit beta (PFP) (EC 2.7.1.90) (6-phosphofructokinase, pyrophosphate dependent) (PPi-PFK) (Pyrophosphate-dependent 6-phosphofructose-1-kinase)
HORVU.MOREX.r3.1HG0002280	4.5294762242769	0.0059880672265197	1H	4889936	4891855	-	NADH:flavin oxidoreductase/NADH oxidase N-terminal domain-containing protein
HORVU.MOREX.r3.4HG0414490	4.50867334196003	0.0060099623327661	4H	599458034	599460697	+	Citrate transporter-like domain-containing protein
HORVU.MOREX.r3.5HG0496380	4.52918885489036	0.0060862489109757	5H	492621768	492625686	+	NAD-dependent epimerase/dehydratase domain-containing protein
HORVU.MOREX.r3.1HG0064780	4.52433030760892	0.0060942180630907	1H	425485730	425489226	+	Cysteine proteinase inhibitor
HORVU.MOREX.r3.7HG0706770	4.50080703856485	0.0060942180630907	7H	440312886	440314444	+	Predicted protein
HORVU.MOREX.r3.3HG0276950	4.518640868583	0.0061529115870939	3H	407750419	407754279	+	Predicted protein
HORVU.MOREX.r3.1HG0092090	4.50402911891302	0.0062463202793083	1H	508259998	508266505	+	GBF-interacting protein 1 N-terminal domain-containing protein
HORVU.MOREX.r3.5HG0443520	4.07491624596377	0.0062463202793083	5H	106325481	106326948	-	Predicted protein
HORVU.MOREX.r3.3HG0266020	4.48550458422977	0.0062848342535337	3H	309567150	309569638	-	Protein transport protein Sec61 subunit beta
HORVU.MOREX.r3.4HG0398160	4.48550458422977	0.0062848342535337	4H	541356874	541357557	+	Predicted protein
HORVU.MOREX.r3.6HG0575530	4.06756059477132	0.0062848342535337	6H	166631157	166635203	+	cinnamyl-alcohol dehydrogenase (EC 1.1.1.195)
HORVU.MOREX.r3.6HG0596480	4.48907381919154	0.0062848342535337	6H	377204361	377205797	+	Predicted protein
HORVU.MOREX.r3.1HG0084770	4.48202925767448	0.0063498999846437	1H	494681597	494685708	+	t-SNARE coiled-coil homology domain-containing protein
HORVU.MOREX.r3.3HG0270820	4.47743442438754	0.0063686824280477	3H	358976305	358980012	+	V-ATPase proteolipid subunit C-like domain-containing protein
HORVU.MOREX.r3.1HG0091610	4.47689138416053	0.0064267751018757	1H	507342502	507344435	+	Transcription elongation factor 1 homolog
HORVU.MOREX.r3.2HG0159360	4.46960687483537	0.0064267751018757	2H	407161425	407163945	-	Predicted protein
HORVU.MOREX.r3.2HG0192860	4.47309919683206	0.0064267751018757	2H	606019221	606020488	-	WRKY transcription factor WRKY51
HORVU.MOREX.r3.3HG0265560	4.46960687483537	0.0064267751018757	3H	304075526	304079080	-	Predicted protein
HORVU.MOREX.r3.5HG0447600	4.47072047891305	0.0064267751018757	5H	139799221	139803136	+	Guanylate kinase 1 (EC 2.7.4.8) (GMP kinase 1)
HORVU.MOREX.r3.5HG0455100	4.05359806752074	0.0064267751018757	5H	236673151	236675940	-	Predicted protein
HORVU.MOREX.r3.5HG0488040	4.47989673029513	0.0064267751018757	5H	468298980	468299985	+	Phytocyanin domain-containing protein
HORVU.MOREX.r3.5HG0505110	1.84250318901539	0.0064267751018757	5H	514619617	514623536	+	Transmembrane 9 superfamily member
HORVU.MOREX.r3.5HG0514950	4.46724246407254	0.0064267751018757	5H	538489303	538492799	-	Predicted protein
HORVU.MOREX.r3.7HG0640790	4.05703059185197	0.0064267751018757	7H	11587547	11589367	+	ACB domain-containing protein
HORVU.MOREX.r3.2HG0114680	4.48080347329401	0.006427166091963	2H	48515419	48519893	-	Signal recognition particle 54 kDa protein
HORVU.MOREX.r3.3HG0221750	4.05703872656608	0.0065373439345038	3H	6923836	6924884	+	Uncharacterized protein
HORVU.MOREX.r3.3HG0264990	4.45729357046859	0.0065479851840647	3H	298067835	298070374	-	V-type proton ATPase subunit F
HORVU.MOREX.r3.6HG0631710	4.07684759827726	0.0065479851840647	6H	557308687	557310124	-	Uncharacterized protein
HORVU.MOREX.r3.1HG0078730	4.47040064788015	0.0065795894942799	1H	482033542	482037308	+	Signal recognition particle 54 kDa protein
HORVU.MOREX.r3.5HG0423110	4.4533484484784	0.0066024018211979	5H	7614777	7615820	+	Thaumatin-like protein
HORVU.MOREX.r3.2HG0122530	4.48852105623282	0.0066535559399157	2H	82424260	82459733	-	Uncharacterized protein
HORVU.MOREX.r3.3HG0231550	4.44736053586582	0.0066607258292455	3H	26737811	26740042	-	EXPERA domain-containing protein
HORVU.MOREX.r3.3HG0303840	4.46590552871399	0.0066607258292455	3H	553984405	553987749	-	BAG family molecular chaperone regulator 4
HORVU.MOREX.r3.1HG0029900	4.44896079147713	0.0066898732131194	1H	142338712	142341509	+	Proteasome subunit beta
HORVU.MOREX.r3.2HG0210680	2.37683342766827	0.0066898732131194	2H	648391392	648394257	+	Anamorsin homolog (Fe-S cluster assembly protein DRE2 homolog)
HORVU.MOREX.r3.2HG0214820	4.44259283027827	0.0066898732131194	2H	657275189	657288180	-	Predicted protein
HORVU.MOREX.r3.7HG0635320	4.4437312135128	0.0066898732131194	7H	2829471	2832563	+	BAG domain-containing protein
HORVU.MOREX.r3.6HG0539520	3.17864291428321	0.0067197540777757	6H	3594401	3598905	-	STI1 domain-containing protein
HORVU.MOREX.r3.2HG0194250	4.43730884005442	0.0067534468845147	2H	609083405	609085304	-	Predicted protein
HORVU.MOREX.r3.5HG0523560	4.45824713201221	0.0067534468845147	5H	556984018	556984930	-	Histone H2A
HORVU.MOREX.r3.5HG0518150	4.43080924016245	0.0068855836121317	5H	545392230	545395659	-	Glutamate dehydrogenase
HORVU.MOREX.r3.1HG0074500	3.18176400570773	0.0068990019005494	1H	468600600	468601250	-	Histone H3
HORVU.MOREX.r3.5HG0423030	4.43099235421737	0.0068990019005494	5H	7450044	7450973	-	Thaumatin-like protein
HORVU.MOREX.r3.6HG0602990	4.43046954550142	0.0068990019005494	6H	429592936	429594782	+	HMG box domain-containing protein
HORVU.MOREX.r3.1HG0024440	4.42426754924504	0.0069238472027036	1H	97262189	97263085	+	Predicted protein
HORVU.MOREX.r3.7HG0644460	4.01846758993462	0.0069368952008069	7H	18667526	18668499	+	Histone H3
HORVU.MOREX.r3.7HG0639360	4.44483025597412	0.0069446248543001	7H	9154930	9159658	-	Predicted protein
HORVU.MOREX.r3.2HG0196390	4.42618383299912	0.006949338398988	2H	615988390	615989124	-	FLZ-type domain-containing protein
HORVU.MOREX.r3.2HG0208270	4.42242605048172	0.0070117804853072	2H	643181632	643186773	-	Superoxide dismutase (EC 1.15.1.1)
HORVU.MOREX.r3.5HG0463230	4.42436925105995	0.0070117804853072	5H	314442379	314445387	+	ADP-ribosylation factor
HORVU.MOREX.r3.4HG0398900	4.46612280890238	0.0070308243435826	4H	545077301	545078136	+	Histone H2A
HORVU.MOREX.r3.3HG0299830	4.41659297117117	0.0070517291465498	3H	538604769	538607369	-	Predicted protein
HORVU.MOREX.r3.3HG0303150	4.41198194697531	0.0070517291465498	3H	551828163	551828826	+	Predicted protein
HORVU.MOREX.r3.3HG0303330	4.43114335194029	0.0070894589619275	3H	552388479	552389152	-	Histone H4
HORVU.MOREX.r3.4HG0349450	4.41282465254409	0.0070894589619275	4H	92656572	92657638	+	Uncharacterized protein
HORVU.MOREX.r3.7HG0674320	4.423338951779	0.0070894589619275	7H	136001514	136004659	-	Vesicle transport protein
HORVU.MOREX.r3.5HG0444200	4.4058361669021	0.0071302718343302	5H	110837558	110838378	-	Predicted protein
HORVU.MOREX.r3.7HG0635300	4.41603831063854	0.007130788029098	7H	2749116	2752281	-	Sucrose:fructan 6-fructosyltransferase (EC 2.4.1.10)
HORVU.MOREX.r3.1HG0059400	4.40803774880079	0.0071317586442873	1H	395766713	395769133	+	Acyl carrier protein
HORVU.MOREX.r3.3HG0289260	4.41040753853276	0.0071317586442873	3H	488595488	488600054	-	Casein kinase substrate phosphoprotein PP28 domain-containing protein
HORVU.MOREX.r3.5HG0490490	4.40412478153493	0.0071317586442873	5H	476338764	476339664	-	Predicted protein
HORVU.MOREX.r3.6HG0614620	4.40735569138976	0.0071317586442873	6H	501938974	501942239	+	Membrane-anchored ubiquitin-fold protein
HORVU.MOREX.r3.2HG0138300	4.40396558779665	0.0071468377882213	2H	192992153	192993221	-	Histone H2A
HORVU.MOREX.r3.6HG0629790	4.40523468479808	0.0071468377882213	6H	554013621	554017634	+	acetyl-CoA C-acyltransferase (EC 2.3.1.16)
HORVU.MOREX.r3.2HG0167060	4.39907336012451	0.0071494049865492	2H	468295998	468296759	+	Bifunctional inhibitor/plant lipid transfer protein/seed storage helical domain-containing protein
HORVU.MOREX.r3.5HG0485330	4.39885721175906	0.0071494049865492	5H	453679250	453683535	+	formate--tetrahydrofolate ligase (EC 6.3.4.3) (Formyltetrahydrofolate synthetase)
HORVU.MOREX.r3.3HG0279580	2.33465452533636	0.0071891188212279	3H	427161382	427163595	-	Glutaredoxin-dependent peroxiredoxin (EC 1.11.1.25)
HORVU.MOREX.r3.2HG0139590	4.41389596418503	0.0072862264204649	2H	203646905	203648521	-	Predicted protein
HORVU.MOREX.r3.3HG0309820	3.98789609540463	0.0073296908986635	3H	572077860	572079529	-	Small ubiquitin-related modifier (SUMO)
HORVU.MOREX.r3.6HG0609520	4.39492697248447	0.0073775281020589	6H	475282567	475286989	+	Predicted protein
HORVU.MOREX.r3.2HG0207520	4.3870792845856	0.0075518131962702	2H	641741403	641741676	+	Wound induced protein
HORVU.MOREX.r3.1HG0056010	4.37072604215604	0.0076003503633828	1H	374227209	374233630	+	Predicted protein
HORVU.MOREX.r3.1HG0065900	4.36940281890606	0.0076003503633828	1H	431462052	431467994	-	Guanosine nucleotide diphosphate dissociation inhibitor
HORVU.MOREX.r3.2HG0185030	4.39943495367261	0.0076003503633828	2H	572534621	572540193	+	HTH cro/C1-type domain-containing protein
HORVU.MOREX.r3.2HG0195130	4.37072604215604	0.0076003503633828	2H	611946413	611957885	+	ABC-type xenobiotic transporter (EC 7.6.2.2)
HORVU.MOREX.r3.1HG0080770	4.38513954536367	0.0076313352178585	1H	486917687	486918340	+	Histone H4
HORVU.MOREX.r3.3HG0295580	3.09678814982373	0.007660624834381	3H	520491421	520494689	+	Tubulin beta chain
HORVU.MOREX.r3.7HG0692370	4.36794294485334	0.007660624834381	7H	288014404	288018761	+	Predicted protein
HORVU.MOREX.r3.1HG0054500	4.36970926020834	0.0076733685258587	1H	364621798	364622327	-	Histone H4
HORVU.MOREX.r3.2HG0107900	4.36361100176462	0.0076733685258587	2H	26214371	26217555	+	Elongation factor 1-alpha
HORVU.MOREX.r3.2HG0123540	4.37998600406708	0.0076733685258587	2H	89289268	89298353	+	Glycosyltransferase (EC 2.4.1.-)
HORVU.MOREX.r3.4HG0344470	3.96657050190212	0.0076733685258587	4H	52823502	52825420	+	Predicted protein
HORVU.MOREX.r3.5HG0484600	4.36487585362411	0.0076733685258587	5H	449710565	449715915	-	RING-CH-type domain-containing protein
HORVU.MOREX.r3.7HG0697550	4.37516804669483	0.0076733685258587	7H	357059642	357062959	+	ABC transporter domain-containing protein
HORVU.MOREX.r3.7HG0667940	4.35838187656173	0.0076901457032549	7H	102223309	102227374	+	Predicted protein
HORVU.MOREX.r3.3HG0230970	4.36137210675089	0.0077153806640421	3H	24924925	24925555	+	Histone H2B
HORVU.MOREX.r3.3HG0294880	4.35489821243815	0.0077318615185529	3H	516423401	516424571	+	AP2/EREBP-like protein (Predicted protein)
HORVU.MOREX.r3.5HG0424890	4.35956492688474	0.0077318615185529	5H	10575584	10577109	+	glutathione transferase (EC 2.5.1.18)
HORVU.MOREX.r3.2HG0180010	4.34876954862577	0.0078571187812994	2H	550873802	550875597	+	Leucine-rich repeat-containing N-terminal plant-type domain-containing protein
HORVU.MOREX.r3.4HG0335500	4.34828879538434	0.0079548376046188	4H	11921419	11924001	-	Proteasome subunit beta
HORVU.MOREX.r3.3HG0265990	4.34113931404735	0.0079843916646955	3H	308685206	308690901	+	Legumain
HORVU.MOREX.r3.7HG0667900	4.38043357614203	0.0079861306358169	7H	102155456	102157418	-	Predicted protein
HORVU.MOREX.r3.7HG0693350	4.33669779717626	0.0080372975774857	7H	302547077	302560205	+	PABP
HORVU.MOREX.r3.7HG0751550	4.3360480761644	0.0080372975774857	7H	627739592	627743615	-	Catalase (EC 1.11.1.6)
HORVU.MOREX.r3.2HG0119500	4.33942626856836	0.0080411693755469	2H	67301734	67305025	+	Gamma carbonic anhydrase
HORVU.MOREX.r3.5HG0442170	4.33918261068661	0.0080411693755469	5H	94424955	94430632	-	Predicted protein
HORVU.MOREX.r3.2HG0214950	4.34868424015999	0.0080499189599893	2H	657437722	657441402	+	Soluble inorganic pyrophosphatase (EC 3.6.1.1) (Pyrophosphate phospho-hydrolase)
HORVU.MOREX.r3.6HG0628930	4.34034187431575	0.0080775388936966	6H	551214771	551218869	+	S-(hydroxymethyl)glutathione dehydrogenase (EC 1.1.1.284)
HORVU.MOREX.r3.1HG0057870	4.33675911277605	0.0081441042374804	1H	385917587	385921053	+	Serine hydroxymethyltransferase (EC 2.1.2.1)
HORVU.MOREX.r3.3HG0231410	4.32754378465801	0.0081441042374804	3H	26420193	26422801	-	Uncharacterized protein
HORVU.MOREX.r3.4HG0387120	4.32716228002386	0.0081723100818337	4H	467430681	467431373	+	Histone H2A
HORVU.MOREX.r3.2HG0200630	3.98840345241473	0.0082282614008206	2H	624392195	624395401	+	Adenosylhomocysteinase (EC 3.13.2.1)
HORVU.MOREX.r3.5HG0499250	4.34184783841336	0.0082282614008206	5H	501437107	501437650	-	Histone H2A
HORVU.MOREX.r3.5HG0446360	4.31942005855585	0.0082899283022451	5H	128794886	128797563	+	Acyl carrier protein
HORVU.MOREX.r3.3HG0298210	4.31331135016881	0.0083540979747987	3H	532769419	532775921	-	RRM domain-containing protein
HORVU.MOREX.r3.4HG0337820	4.31432755655568	0.0083540979747987	4H	19814344	19817813	+	UDP-glucose 6-dehydrogenase (EC 1.1.1.22)
HORVU.MOREX.r3.5HG0484220	4.31660650369945	0.0083540979747987	5H	447023651	447025678	+	Fe2OG dioxygenase domain-containing protein
HORVU.MOREX.r3.3HG0299950	4.30898283355623	0.0084262724855735	3H	539147126	539148065	-	Uncharacterized protein
HORVU.MOREX.r3.5HG0529790	4.30858884055302	0.0084262724855735	5H	571038802	571041338	-	Predicted protein
HORVU.MOREX.r3.7HG0661680	4.37123677669893	0.0084262724855735	7H	67699921	67700635	+	SCP domain-containing protein
HORVU.MOREX.r3.1HG0061370	4.3116310852417	0.0084418396395125	1H	407200050	407205622	+	Phospholipid/glycerol acyltransferase domain-containing protein
HORVU.MOREX.r3.6HG0609600	4.30827639831511	0.0084418396395125	6H	475874998	475880132	+	Uncharacterized protein
HORVU.MOREX.r3.7HG0705160	4.3095845143458	0.0084586130117612	7H	429917016	429918528	+	Peroxidase (EC 1.11.1.7)
HORVU.MOREX.r3.1HG0049980	4.30753602091985	0.0085033096710747	1H	332790193	332793439	-	Predicted protein
HORVU.MOREX.r3.4HG0338100	4.30178643069042	0.0085033096710747	4H	21103341	21109147	-	Glutamate decarboxylase (EC 4.1.1.15)
HORVU.MOREX.r3.1HG0063520	4.30640557166272	0.0085294032244716	1H	418919341	418923346	-	GDSL esterase/lipase
HORVU.MOREX.r3.2HG0218010	4.30070097168493	0.0085294032244716	2H	665280911	665285032	+	Dolichyl-diphosphooligosaccharide--protein glycosyltransferase subunit 1
HORVU.MOREX.r3.1HG0067230	4.30341855863835	0.0085544183971736	1H	437560822	437565169	+	assimilatory sulfite reductase (ferredoxin) (EC 1.8.7.1)
HORVU.MOREX.r3.2HG0187890	4.3011456234209	0.0085544183971736	2H	589295360	589297232	-	HMG box domain-containing protein
HORVU.MOREX.r3.1HG0029490	4.30055166863554	0.008563463935822	1H	137585064	137591379	-	VOC domain-containing protein
HORVU.MOREX.r3.1HG0087980	3.91283994545865	0.008563463935822	1H	500272615	500273349	-	Predicted protein
HORVU.MOREX.r3.6HG0619230	4.2975761613574	0.008563463935822	6H	523202968	523336804	+	WAT1-related protein
HORVU.MOREX.r3.4HG0401720	4.30786426100083	0.0086035642863657	4H	557362443	557363173	+	Histone H3
HORVU.MOREX.r3.6HG0570040	4.30136781721548	0.0086035642863657	6H	123132050	123137525	-	4-coumarate--CoA ligase (EC 6.2.1.12)
HORVU.MOREX.r3.2HG0195550	4.28846189532097	0.0086777522161935	2H	613171888	613172532	-	Uncharacterized protein
HORVU.MOREX.r3.7HG0663470	4.28846189532097	0.0086777522161935	7H	75940776	75943718	-	WAT1-related protein
HORVU.MOREX.r3.1HG0007200	4.28571705204171	0.008707009259135	1H	14710881	14717791	+	Glucose-6-phosphate isomerase (EC 5.3.1.9)
HORVU.MOREX.r3.1HG0019260	4.29371646371126	0.0087267893904224	1H	66158499	66163744	+	Alanine aminotransferase 2 (EC 2.6.1.2) (Glutamate pyruvate transaminase 2) (Glutamic--alanine transaminase 2) (Glutamic--pyruvic transaminase 2)
HORVU.MOREX.r3.6HG0568300	4.28165555105555	0.0087762790099934	6H	111189012	111194443	-	Uncharacterized protein
HORVU.MOREX.r3.1HG0064320	4.27712624818253	0.0087762927005218	1H	423206053	423210519	+	argininosuccinate synthase (EC 6.3.4.5) (Citrulline--aspartate ligase)
HORVU.MOREX.r3.2HG0123880	3.89161172449213	0.0087762927005218	2H	91731548	91735333	+	Phospho-2-dehydro-3-deoxyheptonate aldolase (EC 2.5.1.54)
HORVU.MOREX.r3.3HG0289420	4.27917442918195	0.0087762927005218	3H	489292806	489294800	-	Predicted protein
HORVU.MOREX.r3.4HG0416360	4.27800362563957	0.0087762927005218	4H	604287462	604290674	+	Probable quinone oxidoreductase
HORVU.MOREX.r3.5HG0430870	4.27548708964113	0.0087762927005218	5H	30477902	30482788	-	Sulfurtransferase
HORVU.MOREX.r3.5HG0509800	3.89995296008694	0.0087762927005218	5H	525045830	525049240	+	Histone H2A
HORVU.MOREX.r3.6HG0566720	-5.34115227683314	0.0087762927005218	6H	103078561	103080007	+	Uncharacterized protein
HORVU.MOREX.r3.6HG0630260	4.28027914901521	0.0087762927005218	6H	554802744	554807339	-	Serine/threonine-protein phosphatase (EC 3.1.3.16)
HORVU.MOREX.r3.7HG0700030	4.27826492338377	0.0087762927005218	7H	383903688	383909825	-	Predicted protein
HORVU.MOREX.r3.1HG0073200	4.27391741964232	0.0087941069408101	1H	461485296	461488320	+	Predicted protein
HORVU.MOREX.r3.3HG0290320	4.2739803492158	0.0087941069408101	3H	495867303	495871557	-	Heat shock 70 kDa protein, mitochondrial
HORVU.MOREX.r3.5HG0454320	4.28419692797146	0.0087941069408101	5H	227556621	227561590	+	Predicted protein
HORVU.MOREX.r3.7HG0730350	4.27246571443364	0.0087941069408101	7H	577691373	577692152	-	Histone H2A
HORVU.MOREX.r3.1HG0018730	4.29333498978689	0.0088113031184053	1H	62187233	62190997	+	RNA-binding protein 8A
HORVU.MOREX.r3.5HG0472950	4.27065640708461	0.0088113031184053	5H	387356316	387359668	-	Predicted protein
HORVU.MOREX.r3.1HG0065910	4.27078441671157	0.0088606597286249	1H	431487553	431493159	-	Guanosine nucleotide diphosphate dissociation inhibitor
HORVU.MOREX.r3.5HG0527960	4.27262381249172	0.0088942069346906	5H	566994043	566997667	+	Non-specific phospholipase C1
HORVU.MOREX.r3.7HG0730680	4.26467926263321	0.0089048905889642	7H	578701468	578704535	-	Fe2OG dioxygenase domain-containing protein
HORVU.MOREX.r3.5HG0441980	4.27690325807662	0.0089098549706635	5H	92607075	92607932	-	Predicted protein
HORVU.MOREX.r3.3HG0236190	4.27729212700724	0.0089566707743742	3H	42740511	42741381	-	Predicted protein
HORVU.MOREX.r3.2HG0120050	4.2958715644275	0.008957537443091	2H	69993947	69997525	-	Predicted protein
HORVU.MOREX.r3.3HG0234470	4.26106346496375	0.0089726192914553	3H	36215914	36220596	+	Uncharacterized protein
HORVU.MOREX.r3.6HG0601630	4.25830271427292	0.008999780116475	6H	417564699	417567315	+	S-adenosylmethionine synthase (EC 2.5.1.6)
HORVU.MOREX.r3.2HG0201400	3.87570704678942	0.0090247889468995	2H	626360475	626364141	+	Serine hydroxymethyltransferase (EC 2.1.2.1)
HORVU.MOREX.r3.2HG0193460	4.26054095096571	0.0090712802844997	2H	607164922	607166531	+	EF-hand domain-containing protein
HORVU.MOREX.r3.4HG0419220	3.94506260590034	0.0090712802844997	4H	610084339	610085368	+	Germin-like protein
HORVU.MOREX.r3.2HG0167040	4.25514900487859	0.0090746506874722	2H	468103120	468103843	+	Predicted protein
HORVU.MOREX.r3.4HG0418850	3.93634025549849	0.0090824962997447	4H	609846235	609847193	+	Germin-like protein
HORVU.MOREX.r3.4HG0389850	4.28251265578843	0.0091202190606003	4H	487497463	487500838	-	Predicted protein
HORVU.MOREX.r3.5HG0469330	4.24105273350549	0.0093517771797349	5H	358959220	358963308	-	FRIGIDA-like protein
HORVU.MOREX.r3.2HG0207010	4.23874057962884	0.0093567036871791	2H	640674744	640677820	+	Uncharacterized protein
HORVU.MOREX.r3.6HG0609360	4.23688664122095	0.0093728092836075	6H	473870267	473875853	-	Pyrophosphate--fructose 6-phosphate 1-phosphotransferase subunit alpha (PFP) (6-phosphofructokinase, pyrophosphate dependent) (PPi-PFK) (Pyrophosphate-dependent 6-phosphofructose-1-kinase)
HORVU.MOREX.r3.1HG0039450	-1.8940380426284	0.0093986653584211	1H	249571760	249572479	-	Uncharacterized protein
HORVU.MOREX.r3.3HG0286770	4.23538547564443	0.0093986653584211	3H	473218022	473219514	-	Pathogen-related protein
HORVU.MOREX.r3.2HG0179200	-3.39800631753371	0.0094068272167088	2H	547502942	547503515	-	NADH dehydrogenase [ubiquinone] iron-sulfur protein 3 (EC 7.1.1.2) (NADH dehydrogenase subunit 9)
HORVU.MOREX.r3.5HG0520730	4.24061337362572	0.0094068272167088	5H	550636235	550638456	-	Thioredoxin domain-containing protein
HORVU.MOREX.r3.5HG0522270	4.2315878024973	0.009434965754558	5H	553525923	553531380	-	RNA helicase (EC 3.6.4.13)
HORVU.MOREX.r3.7HG0731730	4.26811930195699	0.0094530772577684	7H	581504696	581507437	-	Bifunctional inhibitor/plant lipid transfer protein/seed storage helical domain-containing protein
HORVU.MOREX.r3.5HG0450380	4.23048576987877	0.009461696849143	5H	174519165	174540633	-	Defective in cullin neddylation protein
HORVU.MOREX.r3.1HG0015250	3.86136073055945	0.0095246544370296	1H	42005142	42007493	-	Predicted protein
HORVU.MOREX.r3.5HG0443610	2.99883012067663	0.0097951799725304	5H	107141310	107144675	+	Predicted protein
HORVU.MOREX.r3.2HG0105020	4.23890028642107	0.0098219834789754	2H	19250304	19251766	+	Plasma membrane intrinsic protein
HORVU.MOREX.r3.4HG0354480	4.21494567041749	0.0098219834789754	4H	130607677	130610170	+	Uncharacterized protein
HORVU.MOREX.r3.3HG0324900	4.22193210560046	0.009898283804788	3H	606705642	606708068	-	Ubiquitin-fold modifier 1
HORVU.MOREX.r3.6HG0593770	4.20983246435311	0.009898283804788	6H	353709821	353714784	+	hydroxycinnamoyl-CoA:5-hydroxyanthranilate N-hydroxycinnamoyltransferase (EC 2.3.1.302)
HORVU.MOREX.r3.3HG0254990	4.21745023563001	0.0100134711343925	3H	184601537	184603487	+	Peroxidase (EC 1.11.1.7)
HORVU.MOREX.r3.2HG0116420	3.03561482188606	0.0101181522088482	2H	54560616	54561715	+	Protein EARLY RESPONSIVE TO DEHYDRATION 15
HORVU.MOREX.r3.5HG0479210	4.22710081995705	0.0101181522088482	5H	424777677	424778799	-	Predicted protein
HORVU.MOREX.r3.3HG0320300	4.19638480832476	0.0101556284102985	3H	597057288	597059920	+	Predicted protein
HORVU.MOREX.r3.4HG0384240	4.19481522193361	0.0101914487930966	4H	446873477	446876774	+	Gamma-interferon-inducible lysosomal thiol reductase
HORVU.MOREX.r3.4HG0371500	3.82537915540096	0.0103282651346285	4H	320451417	320453656	+	H/ACA ribonucleoprotein complex subunit
HORVU.MOREX.r3.4HG0409110	4.19039266378061	0.0103303979268365	4H	585026765	585027514	-	Transmembrane protein
HORVU.MOREX.r3.1HG0090650	4.2192816749533	0.0103509547886518	1H	505267825	505268386	-	Histone H4
HORVU.MOREX.r3.1HG0087620	4.20834832469676	0.0103787172306936	1H	499643939	499645353	-	Xyloglucan endotransglucosylase/hydrolase (EC 2.4.1.207)
HORVU.MOREX.r3.3HG0264900	4.18563592813524	0.0103787172306936	3H	296928569	296934039	+	RNA helicase (EC 3.6.4.13) (API5-interacting protein 1)
HORVU.MOREX.r3.5HG0525920	4.18261031586009	0.0104247815816966	5H	562601591	562604305	+	Predicted protein
HORVU.MOREX.r3.7HG0639380	4.19072968467397	0.0104825964949186	7H	9303817	9308893	-	RuBisCO large subunit-binding protein subunit beta, chloroplastic
HORVU.MOREX.r3.3HG0254420	4.17962661097864	0.0105179178300897	3H	180643899	180648222	+	Predicted protein
HORVU.MOREX.r3.4HG0388430	4.17962661097864	0.0105179178300897	4H	476264308	476271315	-	Predicted protein
HORVU.MOREX.r3.5HG0486660	4.18470969985407	0.0105179178300897	5H	460768590	460769313	+	Predicted protein
HORVU.MOREX.r3.2HG0201110	4.17808851771302	0.0105233565691659	2H	625562156	625565365	+	Predicted protein
HORVU.MOREX.r3.2HG0209690	4.1790334754812	0.0105233565691659	2H	646143401	646145702	-	CASP-like protein
HORVU.MOREX.r3.1HG0074250	4.1762843024867	0.0105303267807023	1H	466899118	466902772	+	Predicted protein
HORVU.MOREX.r3.7HG0745080	4.18089693366069	0.0105303267807023	7H	615347773	615351167	-	Predicted protein
HORVU.MOREX.r3.4HG0368890	4.17147005857767	0.0105500844159678	4H	274336699	274358966	-	Predicted protein
HORVU.MOREX.r3.5HG0487290	4.17147005857767	0.0105500844159678	5H	464123758	464126888	+	Predicted protein
HORVU.MOREX.r3.7HG0663950	4.17515069108778	0.0105500844159678	7H	78824674	78825971	-	Alpha/beta hydrolase fold-3 domain-containing protein
HORVU.MOREX.r3.5HG0511330	4.16745479511513	0.0106148201626874	5H	528702303	528706060	-	COBRA-like protein
HORVU.MOREX.r3.5HG0537180	4.16892431869133	0.0106148201626874	5H	584995959	585000469	-	HTH La-type RNA-binding domain-containing protein
HORVU.MOREX.r3.7HG0672670	3.80922986455548	0.0106148201626874	7H	127513507	127516310	+	Predicted protein
HORVU.MOREX.r3.7HG0650920	2.95814509806393	0.0107386894813572	7H	31494852	31498414	+	Nucleosome assembly protein 1
HORVU.MOREX.r3.1HG0073880	4.16038423818377	0.0107482143713852	1H	464118283	464120527	-	Predicted protein
HORVU.MOREX.r3.2HG0187430	4.16547458552562	0.0107482143713852	2H	586665312	586668699	+	Predicted protein
HORVU.MOREX.r3.2HG0202640	4.17020909012816	0.0107482143713852	2H	629737417	629739542	-	Predicted protein (Universal stress protein 23267)
HORVU.MOREX.r3.3HG0221040	2.96723469167204	0.0107482143713852	3H	5468219	5471756	-	Fructose-bisphosphate aldolase (EC 4.1.2.13)
HORVU.MOREX.r3.6HG0611730	4.18600937355111	0.0107482143713852	6H	488448066	488450472	-	H/ACA ribonucleoprotein complex subunit 2 (Nucleolar protein family A member 2)
HORVU.MOREX.r3.3HG0242160	4.17230840468499	0.010773753168565	3H	83055480	83059182	+	Uncharacterized protein
HORVU.MOREX.r3.2HG0159720	4.15722171885304	0.0108377103277142	2H	411111020	411129085	+	NADP-dependent oxidoreductase domain-containing protein
HORVU.MOREX.r3.2HG0159730	4.15722171885304	0.0108377103277142	2H	411135921	411153985	+	NADP-dependent oxidoreductase domain-containing protein
HORVU.MOREX.r3.7HG0751310	3.79945311945297	0.0109304969973616	7H	627320380	627322381	-	HMG box domain-containing protein
HORVU.MOREX.r3.4HG0414480	4.14568620422918	0.0110531085950508	4H	599425545	599427573	+	Small nuclear ribonucleoprotein Sm D2 (Sm-D2) (snRNP core protein D2)
HORVU.MOREX.r3.2HG0201790	4.15707618194054	0.0110532033210358	2H	627297694	627301762	-	Predicted protein
HORVU.MOREX.r3.6HG0596500	3.80653726407392	0.0110707338471373	6H	377231389	377236948	-	Adenosine kinase (AK) (EC 2.7.1.20) (Adenosine 5'-phosphotransferase)
HORVU.MOREX.r3.6HG0631700	4.1591484138344	0.0110707338471373	6H	557290842	557292414	+	Uncharacterized protein
HORVU.MOREX.r3.4HG0370780	4.14517246354894	0.0111227924575607	4H	308571806	308576771	+	CCT-theta
HORVU.MOREX.r3.2HG0170160	4.13940710704505	0.0111840646936797	2H	489044333	489050545	-	Predicted protein
HORVU.MOREX.r3.3HG0293070	4.14383300656069	0.0111840863223877	3H	508263950	508266734	-	Predicted protein
HORVU.MOREX.r3.5HG0471700	4.13410432037777	0.0112841606748892	5H	379608076	379611929	-	UBC core domain-containing protein
HORVU.MOREX.r3.3HG0258150	4.13656830405318	0.011311340730781	3H	214563438	214568640	-	Coatomer subunit beta (Beta-coat protein)
HORVU.MOREX.r3.4HG0381960	4.1359071220774	0.0113413133095706	4H	426271694	426276924	+	Predicted protein
HORVU.MOREX.r3.3HG0242790	4.15702445433428	0.0113561193792797	3H	85848322	85850735	+	Cell number regulator 8
HORVU.MOREX.r3.4HG0387150	4.13029814802701	0.0113561193792797	4H	467564990	467565573	+	Histone H2A
HORVU.MOREX.r3.7HG0739170	2.93634480531786	0.0113561193792797	7H	601770840	601777774	+	V-type proton ATPase catalytic subunit A (EC 7.1.2.2) (V-ATPase 69 kDa subunit) (Vacuolar proton pump subunit alpha)
HORVU.MOREX.r3.7HG0689170	4.12762596153185	0.0113769418512423	7H	249813957	249817544	-	uridine nucleosidase (EC 3.2.2.3)
HORVU.MOREX.r3.5HG0465330	4.13813284672549	0.0113958278130609	5H	329888951	329893627	-	Macrophage migration inhibitory factor homolog
HORVU.MOREX.r3.2HG0197200	4.12618821041804	0.0114056032290889	2H	618032243	618034244	-	PLATZ transcription factor family protein
HORVU.MOREX.r3.4HG0405170	4.1247212211928	0.0114056032290889	4H	569327331	569330819	-	Proteasome subunit alpha type
HORVU.MOREX.r3.1HG0069380	4.12258798111585	0.011418773099263	1H	447066482	447067230	+	Cysteine proteinase inhibitor
HORVU.MOREX.r3.1HG0079230	4.12450262819234	0.011418773099263	1H	483375219	483378067	+	Programmed cell death protein 5
HORVU.MOREX.r3.4HG0336310	4.12450262819234	0.011418773099263	4H	13923857	13925632	-	Predicted protein
HORVU.MOREX.r3.4HG0389180	4.1337100644909	0.011418773099263	4H	482457219	482461273	-	Serine/threonine-protein phosphatase (EC 3.1.3.16)
HORVU.MOREX.r3.5HG0482670	4.12128017508569	0.011418773099263	5H	441915630	441920070	-	Cellulose synthase (EC 2.4.1.12)
HORVU.MOREX.r3.7HG0655760	4.13898822603279	0.011418773099263	7H	47460643	47460895	-	Uncharacterized protein
HORVU.MOREX.r3.7HG0691610	4.12209399069808	0.011418773099263	7H	277571823	277582434	+	Alpha-soluble NSF attachment protein
HORVU.MOREX.r3.7HG0709680	4.12950918555117	0.0114900769232027	7H	458545639	458551504	+	T-complex protein 1 subunit gamma
HORVU.MOREX.r3.5HG0494020	4.16151770335734	0.0115061004363051	5H	487094439	487098065	-	Proteasome subunit beta
HORVU.MOREX.r3.1HG0043600	4.12481426006406	0.0115346100921984	1H	282910772	282917319	+	Predicted protein
HORVU.MOREX.r3.5HG0489560	4.11254361366738	0.0115844309017896	5H	473971240	473971995	+	Uncharacterized protein
HORVU.MOREX.r3.5HG0538180	4.11254361366738	0.0115844309017896	5H	587763141	587770819	+	ABC transporter domain-containing protein
HORVU.MOREX.r3.5HG0534140	4.11416690220737	0.0115866707861029	5H	579502292	579503427	-	Uncharacterized protein
HORVU.MOREX.r3.6HG0623920	4.1110289280249	0.0115866707861029	6H	538612322	538616250	-	Cytosol aminopeptidase domain-containing protein
HORVU.MOREX.r3.1HG0056570	4.11447032460468	0.0116159857369773	1H	378086355	378087902	-	Predicted protein
HORVU.MOREX.r3.3HG0329540	4.10963013835637	0.0116514704412208	3H	617025362	617025969	-	Metallothionein-like protein
HORVU.MOREX.r3.6HG0564480	4.10723182753721	0.0116514704412208	6H	90011683	90016941	+	T-complex protein 1 subunit eta (TCP-1-eta) (CCT-eta)
HORVU.MOREX.r3.2HG0190220	4.10409614134718	0.0116715234350196	2H	597893185	597893717	+	Histone H4
HORVU.MOREX.r3.3HG0250170	4.10697047078058	0.0116715234350196	3H	146796131	146798291	+	aminodeoxychorismate lyase (EC 4.1.3.38)
HORVU.MOREX.r3.4HG0380030	4.11134089066501	0.0116715234350196	4H	407692270	407696412	-	Predicted protein
HORVU.MOREX.r3.5HG0532090	4.10443247118673	0.0116715234350196	5H	575793149	575796173	+	Prohibitin
HORVU.MOREX.r3.6HG0571560	4.11080097849858	0.0116715234350196	6H	134720375	134725902	-	Glyceraldehyde-3-phosphate dehydrogenase (EC 1.2.1.-)
HORVU.MOREX.r3.7HG0745450	4.10553386854028	0.0116715234350196	7H	615823897	615827253	-	Uncharacterized protein
HORVU.MOREX.r3.1HG0044530	4.12552791956824	0.0116883486928187	1H	291390351	291391291	+	Predicted protein
HORVU.MOREX.r3.5HG0465550	3.75541061740887	0.0116883486928187	5H	331491361	331497330	+	E1 ubiquitin-activating enzyme (EC 6.2.1.45)
HORVU.MOREX.r3.6HG0613220	3.74502544623625	0.0116883486928187	6H	495055699	495056884	-	Phytocyanin domain-containing protein
HORVU.MOREX.r3.1HG0064240	4.09986185718421	0.0116938757814336	1H	422644109	422650526	-	Coatomer subunit delta
HORVU.MOREX.r3.2HG0203500	4.11209079613775	0.0116938757814336	2H	631587481	631590230	+	Uncharacterized protein
HORVU.MOREX.r3.3HG0231050	4.11723452862891	0.0116938757814336	3H	25147232	25147851	-	Histone H2B
HORVU.MOREX.r3.5HG0485800	4.10050373621502	0.0116938757814336	5H	456736801	456742063	+	protein disulfide-isomerase (EC 5.3.4.1)
HORVU.MOREX.r3.6HG0615280	4.09984821932921	0.0116938757814336	6H	506076838	506080269	-	NIP2;1 (Predicted protein)
HORVU.MOREX.r3.6HG0620090	4.14052697370405	0.0117618494078611	6H	526609450	526611446	-	Growth-regulating factor
HORVU.MOREX.r3.1HG0082960	4.10781828699536	0.011764047562837	1H	491119548	491122035	-	alcohol dehydrogenase (EC 1.1.1.1)
HORVU.MOREX.r3.4HG0400740	4.09335186478004	0.0117828622086279	4H	552775857	552780213	-	Predicted protein
HORVU.MOREX.r3.6HG0629350	4.09335186478004	0.0117828622086279	6H	552692892	552696839	+	Predicted protein
HORVU.MOREX.r3.5HG0499480	4.10305119736476	0.0117940327467713	5H	502203241	502207311	+	ER lumen protein-retaining receptor
HORVU.MOREX.r3.7HG0651300	4.12775935668292	0.0118108908979584	7H	32269431	32270156	-	SCP domain-containing protein
HORVU.MOREX.r3.7HG0654460	4.09026484091105	0.0118349250943949	7H	43730100	43730765	+	Histone H3
HORVU.MOREX.r3.2HG0185840	3.73352488986551	0.0118437084503846	2H	578557721	578558288	+	Histone H4
HORVU.MOREX.r3.3HG0309800	4.09225397789726	0.0118437084503846	3H	571971174	571973973	-	Small ubiquitin-related modifier (SUMO)
HORVU.MOREX.r3.6HG0552610	4.10375198866673	0.0118437084503846	6H	33886164	33888466	+	L-lactate dehydrogenase (EC 1.1.1.27)
HORVU.MOREX.r3.5HG0523160	4.09453612268028	0.0118978007547601	5H	555721948	555725283	+	Proteasome subunit beta
HORVU.MOREX.r3.6HG0619950	4.08332422611288	0.0120257951639673	6H	526215512	526219269	-	Nuclear transcription factor Y subunit
HORVU.MOREX.r3.7HG0648080	4.08014704689442	0.0120257951639673	7H	25524931	25528706	-	Proteasome subunit beta
HORVU.MOREX.r3.7HG0709720	4.08236701446954	0.0120257951639673	7H	458901103	458902043	-	Predicted protein
HORVU.MOREX.r3.2HG0122620	4.11512668355256	0.0120362688897684	2H	82992849	82993779	+	Subtilisin-chymotrypsin inhibitor-2A
HORVU.MOREX.r3.3HG0222780	4.07880301651954	0.0120362688897684	3H	9204217	9209142	-	Uncharacterized protein
HORVU.MOREX.r3.6HG0549580	4.08420934229113	0.0120362688897684	6H	25029986	25031118	+	Predicted protein
HORVU.MOREX.r3.6HG0549380	3.73019597891667	0.0120834907340509	6H	24459669	24462789	+	Gamma-glutamylcyclotransferase
HORVU.MOREX.r3.7HG0718040	4.11427236194014	0.0120834907340509	7H	516513959	516517472	-	Protein kinase domain-containing protein
HORVU.MOREX.r3.6HG0546770	4.09551120632949	0.0120969207337357	6H	18061607	18066065	+	GDSL esterase/lipase
HORVU.MOREX.r3.5HG0509090	4.08147752675924	0.0121289860408156	5H	523146423	523147952	-	Auxin-responsive protein
HORVU.MOREX.r3.3HG0269850	4.07397812429357	0.0122780756731889	3H	348938363	348941512	-	Predicted protein
HORVU.MOREX.r3.1HG0087960	4.0813955289368	0.0122944088637697	1H	500251654	500254612	+	Predicted protein
HORVU.MOREX.r3.2HG0207400	4.06758986491686	0.0123376875719098	2H	641468427	641472463	+	N-acetyltransferase domain-containing protein
HORVU.MOREX.r3.7HG0634850	4.08311392436844	0.0124032502995499	7H	1549488	1554703	+	Acyl-coenzyme A oxidase
HORVU.MOREX.r3.7HG0740420	4.06391691071755	0.0124032502995499	7H	605165373	605167764	-	Sm protein F
HORVU.MOREX.r3.2HG0213820	4.05726870866769	0.012477275324409	2H	654836805	654837911	+	Predicted protein
HORVU.MOREX.r3.3HG0306200	4.05810429399504	0.012477275324409	3H	561294325	561297031	+	fructokinase (EC 2.7.1.4)
HORVU.MOREX.r3.5HG0512600	3.71087542372993	0.012477275324409	5H	531852112	531853677	+	Peroxidase (EC 1.11.1.7)
HORVU.MOREX.r3.6HG0606180	4.06119110479925	0.012477275324409	6H	455596118	455598051	-	Uncharacterized protein
HORVU.MOREX.r3.7HG0727060	4.05923435418777	0.012477275324409	7H	564823076	564832709	-	DUF7794 domain-containing protein
HORVU.MOREX.r3.1HG0022660	4.07806280851863	0.0125046994852247	1H	85373219	85375911	+	Predicted protein
HORVU.MOREX.r3.2HG0132730	4.073026847317	0.0125606294428306	2H	150119264	150127977	+	Predicted protein
HORVU.MOREX.r3.4HG0403790	4.05717095226249	0.0125606294428306	4H	565944336	565947811	+	alanine--glyoxylate transaminase (EC 2.6.1.44)
HORVU.MOREX.r3.1HG0023990	3.70097043112038	0.0126010333494336	1H	93938793	93943411	-	Importin subunit alpha
HORVU.MOREX.r3.2HG0195190	4.05790112561765	0.0126311795988708	2H	612098526	612099694	-	Uncharacterized protein
HORVU.MOREX.r3.3HG0273490	2.15329303191579	0.0126311795988708	3H	380855904	380862983	+	Protein SGT1 homolog (Suppressor of G2 allele of SKP1 homolog)
HORVU.MOREX.r3.6HG0614420	4.05832204101817	0.0126311795988708	6H	500993985	500995879	-	AP2/ERF domain-containing protein
HORVU.MOREX.r3.1HG0046150	4.04988801948802	0.0126414144332658	1H	303581210	303586895	-	Alpha-galactosidase (EC 3.2.1.22) (Melibiase)
HORVU.MOREX.r3.5HG0513830	3.6967244972198	0.0126912805586764	5H	535904523	535907435	+	Tubulin alpha chain
HORVU.MOREX.r3.5HG0447780	4.04529043781589	0.0127023085951013	5H	142786874	142793633	+	1-acylglycerol-3-phosphate O-acyltransferase (EC 2.3.1.51)
HORVU.MOREX.r3.3HG0246560	2.43481371761879	0.0127023869774864	3H	116186077	116190036	+	HTH cro/C1-type domain-containing protein
HORVU.MOREX.r3.3HG0262630	4.04412169883264	0.0127023869774864	3H	266339637	266346343	-	Predicted protein
HORVU.MOREX.r3.3HG0293700	4.08337962286308	0.0127918334657077	3H	511076379	511085610	+	Predicted protein
HORVU.MOREX.r3.1HG0081100	4.04873487885693	0.0128093163663514	1H	487806782	487810011	+	Uncharacterized protein
HORVU.MOREX.r3.4HG0417590	3.70694361323378	0.0128093163663514	4H	606840552	606841583	+	Uncharacterized protein
HORVU.MOREX.r3.1HG0059370	4.03565606908056	0.0129098288648732	1H	395556642	395559355	+	Signal peptidase complex catalytic subunit SEC11 (EC 3.4.21.89) (Signal peptidase complex catalytic subunit sec11)
HORVU.MOREX.r3.1HG0069290	4.03397591802239	0.0129485172326646	1H	446989478	446991512	-	Predicted protein
HORVU.MOREX.r3.2HG0195510	4.03080615604034	0.0130337798188621	2H	613116807	613117363	-	Uncharacterized protein
HORVU.MOREX.r3.5HG0474770	2.87140812942002	0.0130421540661533	5H	398030112	398036206	-	Proton pump-interactor 1
HORVU.MOREX.r3.3HG0303190	4.02954133025364	0.0130428301907247	3H	551992780	551996202	-	UDP-glucuronate decarboxylase (EC 4.1.1.35)
HORVU.MOREX.r3.7HG0654410	4.02907809012959	0.0130477398699331	7H	43546953	43547605	-	Histone H3
HORVU.MOREX.r3.2HG0125430	4.0280758839511	0.0130858889314753	2H	100694485	100696829	-	Protein TIFY (Jasmonate ZIM domain-containing protein)
HORVU.MOREX.r3.2HG0169250	4.05644233196532	0.0130924388880939	2H	481968046	481973678	-	L-ascorbate peroxidase (EC 1.11.1.11)
HORVU.MOREX.r3.3HG0279330	4.02508705921303	0.0131226143937454	3H	424986717	424989876	-	Predicted protein
HORVU.MOREX.r3.2HG0205770	4.02906181428354	0.013126556469235	2H	637870924	637876791	-	Predicted protein
HORVU.MOREX.r3.7HG0707700	4.02144539436925	0.0132121591463897	7H	444375595	444377067	+	Predicted protein
HORVU.MOREX.r3.3HG0254940	4.0756923501904	0.0132481190353651	3H	184166690	184168459	-	Peroxidase (EC 1.11.1.7)
HORVU.MOREX.r3.1HG0074000	4.02959101619752	0.0132765909981034	1H	465108437	465110794	-	UspA domain-containing protein
HORVU.MOREX.r3.4HG0410090	4.03819279173546	0.0132765909981034	4H	588126590	588131540	-	Hypersensitive-induced reaction protein 1
HORVU.MOREX.r3.5HG0438710	4.01805209582796	0.0132765909981034	5H	67247420	67254306	+	methionine--tRNA ligase (EC 6.1.1.10) (Methionyl-tRNA synthetase)
HORVU.MOREX.r3.5HG0485920	4.03819279173546	0.0132765909981034	5H	457548015	457548693	-	Predicted protein
HORVU.MOREX.r3.3HG0284020	3.67625226634293	0.0132773917692663	3H	457471151	457476209	+	non-specific serine/threonine protein kinase (EC 2.7.11.1)
HORVU.MOREX.r3.2HG0100890	4.02276672659186	0.0133028777209379	2H	12211594	12216320	-	Phosphoglycerate mutase-like protein 1
HORVU.MOREX.r3.2HG0161130	4.03090566721392	0.0133469358466096	2H	423051160	423056867	-	Eukaryotic translation initiation factor 3 subunit H (eIF3h)
HORVU.MOREX.r3.2HG0100250	4.02107108237605	0.0133753286336466	2H	11229055	11230525	+	Stress-response A/B barrel domain-containing protein
HORVU.MOREX.r3.3HG0288960	4.02642156545053	0.0133753286336466	3H	487041658	487046997	+	cellulose synthase (UDP-forming) (EC 2.4.1.12)
HORVU.MOREX.r3.3HG0326880	4.03600562110842	0.0133753286336466	3H	611582388	611583149	-	Barwin domain-containing protein
HORVU.MOREX.r3.6HG0578930	4.02107108237605	0.0133753286336466	6H	193350950	193357498	+	Histone deacetylase (EC 3.5.1.98)
HORVU.MOREX.r3.1HG0076120	3.66370584656879	0.0134491131052296	1H	473999975	474003158	+	Patellin-5
HORVU.MOREX.r3.2HG0108780	4.00824107720464	0.0134491131052296	2H	28544030	28547482	+	Predicted protein
HORVU.MOREX.r3.2HG0196930	4.01120850688337	0.0134491131052296	2H	617232566	617234172	+	Predicted protein
HORVU.MOREX.r3.7HG0642550	4.00745541943215	0.013510490206795	7H	15076664	15079298	-	Uncharacterized protein
HORVU.MOREX.r3.7HG0668040	3.68985954265854	0.0135461091180493	7H	102331409	102332157	+	Predicted protein
HORVU.MOREX.r3.1HG0060270	3.6647852520296	0.0135581410734126	1H	401851865	401852530	+	Histone H3
HORVU.MOREX.r3.7HG0730720	4.00361793685	0.0135581410734126	7H	578827932	578834890	-	RNA polymerase I-specific transcription initiation factor RRN3
HORVU.MOREX.r3.1HG0012620	4.00073714167771	0.0135728716340535	1H	31322084	31323977	+	Patatin (EC 3.1.1.-)
HORVU.MOREX.r3.7HG0722940	4.00073714167771	0.0135728716340535	7H	545558818	545563362	+	tryptophan synthase (EC 4.2.1.20)
HORVU.MOREX.r3.2HG0184840	4.01194473147222	0.0135841014487102	2H	571876634	571878995	+	GATA-type domain-containing protein
HORVU.MOREX.r3.1HG0016200	3.9994379319251	0.0135935782071718	1H	46848955	46851199	+	acetylornithine transaminase (EC 2.6.1.11) (Acetylornithine transaminase)
HORVU.MOREX.r3.2HG0131530	4.00726863041797	0.0135935782071718	2H	141775260	141780402	-	Succinate--CoA ligase [ADP-forming] subunit alpha, mitochondrial (EC 6.2.1.5) (Succinyl-CoA synthetase subunit alpha) (SCS-alpha)
HORVU.MOREX.r3.2HG0191250	3.99834239777283	0.0135935782071718	2H	601735312	601739455	+	Coatomer subunit epsilon
HORVU.MOREX.r3.3HG0303270	3.99754162335365	0.0135935782071718	3H	552188508	552189324	+	Signal peptidase complex subunit 1
HORVU.MOREX.r3.2HG0167460	3.99666761873923	0.0136032643060512	2H	471269665	471271355	+	U-box domain-containing protein (EC 2.3.2.27) (RING-type E3 ubiquitin transferase PUB)
HORVU.MOREX.r3.1HG0066260	3.65346906192864	0.0136194651736238	1H	433062562	433065408	-	Tubulin beta chain
HORVU.MOREX.r3.3HG0225930	3.9944787623035	0.0136772247358793	3H	14058913	14064187	+	aldehyde oxygenase (deformylating) (EC 4.1.99.5)
HORVU.MOREX.r3.6HG0573290	3.99482791644985	0.0136772247358793	6H	149177127	149178854	+	Predicted protein
HORVU.MOREX.r3.1HG0008440	3.99115257631519	0.0136890779663921	1H	19818870	19824392	+	Dehydroascorbate reductase
HORVU.MOREX.r3.1HG0016310	3.99643110366183	0.0136890779663921	1H	47245909	47247226	-	Predicted protein
HORVU.MOREX.r3.4HG0331410	3.99612813392947	0.0136890779663921	4H	400799	402622	+	Predicted protein
HORVU.MOREX.r3.4HG0332920	3.99404470796689	0.0136890779663921	4H	4225309	4228360	-	PCI domain-containing protein
HORVU.MOREX.r3.5HG0497970	4.00771889881994	0.0136890779663921	5H	497085552	497086516	+	AP2/ERF domain-containing protein
HORVU.MOREX.r3.1HG0080780	3.99755018075221	0.0138222341041129	1H	486921367	486922028	+	Histone H3
HORVU.MOREX.r3.2HG0204350	3.99178601442629	0.01383362076123	2H	633929274	633933287	+	Glycosyltransferases (EC 2.4.-.-)
HORVU.MOREX.r3.3HG0295400	3.98555150231648	0.01383362076123	3H	519451036	519453136	-	WAT1-related protein
HORVU.MOREX.r3.4HG0388680	3.98760736179616	0.013846996959803	4H	478811823	478813296	-	RING-type E3 ubiquitin transferase (EC 2.3.2.27)
HORVU.MOREX.r3.2HG0128640	3.6532043634916	0.0139220014170073	2H	118154163	118157627	+	Eukaryotic translation initiation factor 5A (eIF-5A)
HORVU.MOREX.r3.6HG0573110	3.97737407469912	0.0140413941113495	6H	147648227	147652353	+	Fumarylacetoacetase (EC 3.7.1.2) (Fumarylacetoacetate hydrolase)
HORVU.MOREX.r3.7HG0681920	3.98795259843555	0.0140591702517835	7H	188842174	188847896	+	Predicted protein
HORVU.MOREX.r3.7HG0687540	3.97859220816809	0.014070152800421	7H	237601593	237606535	+	Proteasome subunit alpha type
HORVU.MOREX.r3.5HG0494570	3.97402648802108	0.0141129504664888	5H	488965597	488971746	-	S-acyltransferase (EC 2.3.1.225) (Palmitoyltransferase)
HORVU.MOREX.r3.3HG0302880	3.97318766222861	0.0141186925957858	3H	550958536	550964488	+	E2 ubiquitin-conjugating enzyme (EC 2.3.2.23)
HORVU.MOREX.r3.2HG0109470	-3.13542534869274	0.0141298387977951	2H	30261935	30262400	+	NAD(P)H dehydrogenase subunit H
HORVU.MOREX.r3.2HG0119120	3.97715050882655	0.0141298387977951	2H	66063615	66065795	+	GPI-anchored protein
HORVU.MOREX.r3.2HG0179060	-3.13542534869274	0.0141298387977951	2H	547445642	547446107	+	NAD(P)H dehydrogenase subunit H
HORVU.MOREX.r3.7HG0750080	3.64404081508859	0.0141298387977951	7H	624404099	624405903	+	4-hydroxy-4-methyl-2-oxoglutarate aldolase (HMG aldolase) (EC 4.1.1.112) (EC 4.1.3.17) (Oxaloacetate decarboxylase)
HORVU.MOREX.r3.4HG0332540	3.97641611460209	0.0141330440004498	4H	3370620	3374746	-	monodehydroascorbate reductase (NADH) (EC 1.6.5.4)
HORVU.MOREX.r3.6HG0573820	3.97149759684204	0.0142068860137896	6H	153072334	153079196	+	Citrate synthase
HORVU.MOREX.r3.6HG0543750	2.84290361678112	0.014273755912696	6H	13537779	13538642	+	Histone H2A
HORVU.MOREX.r3.2HG0122140	3.96550483886149	0.0142942404741718	2H	80857543	80858535	-	EF-hand domain-containing protein
HORVU.MOREX.r3.4HG0416190	3.63439904731767	0.0142942404741718	4H	604134564	604139883	-	Coatomer subunit alpha
HORVU.MOREX.r3.1HG0081060	3.96197166837825	0.0142993504574027	1H	487756873	487760068	-	Predicted protein
HORVU.MOREX.r3.2HG0178010	3.96197166837825	0.0142993504574027	2H	541599635	541607924	-	chitinase (EC 3.2.1.14)
HORVU.MOREX.r3.4HG0393620	3.9624741715619	0.0142993504574027	4H	514082453	514100220	-	3''-deamino-3''-oxonicotianamine reductase (EC 1.1.1.285)
HORVU.MOREX.r3.6HG0591390	3.96295112646235	0.0142993504574027	6H	334628960	334631411	-	Predicted protein
HORVU.MOREX.r3.7HG0719220	3.96644687817593	0.0142993504574027	7H	522970495	522972244	+	non-specific serine/threonine protein kinase (EC 2.7.11.1)
HORVU.MOREX.r3.3HG0230950	-2.14332756641539	0.0144122479787232	3H	24903608	24906457	+	SLT1 protein
HORVU.MOREX.r3.5HG0471790	3.98082140674383	0.0144122479787232	5H	380194073	380198568	-	Sugar phosphate transporter domain-containing protein
HORVU.MOREX.r3.5HG0498320	3.95730063403013	0.0144122479787232	5H	498126268	498130264	+	Predicted protein
HORVU.MOREX.r3.1HG0040610	3.97449652320711	0.0144728449622778	1H	256688375	256698686	+	Predicted protein
HORVU.MOREX.r3.6HG0591080	3.95556821849548	0.0144728449622778	6H	330939910	330940947	-	Coiled-coil domain-containing protein 86
HORVU.MOREX.r3.3HG0236020	3.9595642552646	0.0146144095737977	3H	41129302	41129961	-	Predicted protein
HORVU.MOREX.r3.2HG0126000	3.94686762001603	0.0147025202979387	2H	103152478	103153488	-	Predicted protein
HORVU.MOREX.r3.4HG0333410	3.94686762001603	0.0147025202979387	4H	5647397	5648345	-	Thaumatin-like protein
HORVU.MOREX.r3.6HG0569710	3.61139593964076	0.0147025202979387	6H	120976252	120978806	-	Protein transport protein Sec61 subunit gamma
HORVU.MOREX.r3.2HG0100660	3.60935591759259	0.0148294002638455	2H	11986451	11989711	+	Rhomboid-like protein
HORVU.MOREX.r3.5HG0508860	3.94299698554875	0.0149667728980588	5H	522595183	522600427	-	Major facilitator superfamily (MFS) profile domain-containing protein
HORVU.MOREX.r3.6HG0605250	3.95466485983841	0.0150085041358244	6H	449159162	449161357	-	Predicted protein
HORVU.MOREX.r3.3HG0248810	3.93908834639352	0.0150265761518271	3H	133431580	133435074	-	Eukaryotic translation initiation factor 3 subunit L (eIF3l)
HORVU.MOREX.r3.1HG0075570	3.9331427407415	0.0150870833217717	1H	472681241	472685848	-	Bifunctional aspartate aminotransferase and glutamate/aspartate-prephenate aminotransferase
HORVU.MOREX.r3.4HG0335750	3.95993438774587	0.0150870833217717	4H	12720517	12725933	+	Pescadillo homolog
HORVU.MOREX.r3.5HG0469320	3.93264843993138	0.015094991966803	5H	358909675	358911137	+	Predicted protein
HORVU.MOREX.r3.5HG0465530	3.92924831340546	0.0151815361047006	5H	331382592	331385051	+	Ferritin (EC 1.16.3.1)
HORVU.MOREX.r3.6HG0616110	3.95872344721313	0.0151815361047006	6H	510728547	510731836	+	Pyruvate dehydrogenase E1 component subunit alpha (EC 1.2.4.1)
HORVU.MOREX.r3.4HG0398820	3.94220313264213	0.0151842653829455	4H	544882553	544886216	+	Predicted protein
HORVU.MOREX.r3.5HG0523220	3.93295455787204	0.0151842653829455	5H	555894644	555899443	+	RRM domain-containing protein
HORVU.MOREX.r3.7HG0665610	3.93222915168098	0.0151842653829455	7H	87095071	87107139	-	C2 domain-containing protein
HORVU.MOREX.r3.6HG0554790	3.91996806289381	0.0154817912439018	6H	41552925	41555972	+	Proteasome subunit alpha type
HORVU.MOREX.r3.1HG0073160	3.92180775472954	0.015509930946463	1H	461262680	461263751	+	Histone H2A
HORVU.MOREX.r3.4HG0408760	3.92582598954867	0.0155152949096677	4H	583965162	583972519	+	Aconitate hydratase (Aconitase) (EC 4.2.1.3)
HORVU.MOREX.r3.3HG0253630	2.80866712027745	0.0155723635193969	3H	174868711	174869443	-	Late embryogenesis abundant protein
HORVU.MOREX.r3.3HG0255430	3.918878902868	0.0155723635193969	3H	188332089	188332613	-	Secreted protein
HORVU.MOREX.r3.6HG0622540	3.92911681908474	0.0155723635193969	6H	533897490	533899366	+	Equilibrative nucleotide transporter 1
HORVU.MOREX.r3.1HG0060320	3.58992454662459	0.0155731133797611	1H	401913160	401913859	-	Histone H3
HORVU.MOREX.r3.2HG0196120	3.92756360860207	0.0155731133797611	2H	615155570	615160085	+	non-specific serine/threonine protein kinase (EC 2.7.11.1)
HORVU.MOREX.r3.4HG0378650	3.9181331011643	0.0155731133797611	4H	393533617	393542677	-	EGF-like calcium-binding domain-containing protein
HORVU.MOREX.r3.3HG0245890	3.91288789977132	0.0155798063429395	3H	109121162	109125764	-	Predicted protein
HORVU.MOREX.r3.7HG0657010	3.90978440419052	0.0156980155053977	7H	51596121	51599049	-	Uncharacterized protein
HORVU.MOREX.r3.1HG0052140	3.92195711627175	0.0157059045771846	1H	347441358	347445875	+	PPPDE domain-containing protein
HORVU.MOREX.r3.3HG0257140	3.90752351115032	0.0157059045771846	3H	204703218	204706642	-	Predicted protein
HORVU.MOREX.r3.4HG0352200	3.58055203536427	0.0157059045771846	4H	113114483	113117250	+	Predicted protein
HORVU.MOREX.r3.5HG0522880	-4.15608859507638	0.0157059045771846	5H	555069255	555074606	-	Cellulose synthase (EC 2.4.1.12)
HORVU.MOREX.r3.3HG0228030	3.90585970412216	0.0157924174311069	3H	18750285	18753693	-	14-3-3 domain-containing protein
HORVU.MOREX.r3.3HG0256380	3.90599955223516	0.0157924174311069	3H	197160214	197161248	-	E2 ubiquitin-conjugating enzyme (EC 2.3.2.23)
HORVU.MOREX.r3.6HG0613490	3.94050748416038	0.0157924174311069	6H	496055418	496060550	-	dihydropyrimidine dehydrogenase (NADP(+)) (EC 1.3.1.2)
HORVU.MOREX.r3.1HG0021640	3.90789897816698	0.0157985205884363	1H	79274125	79276328	+	Peroxidase (EC 1.11.1.7)
HORVU.MOREX.r3.3HG0300030	3.90313803332344	0.0159500350983898	3H	539560549	539569277	+	Uricase (EC 1.7.3.3) (Urate oxidase)
HORVU.MOREX.r3.6HG0628590	3.89723440523015	0.0160011059123842	6H	550525819	550531558	-	Glutathione reductase (GRase) (EC 1.8.1.7)
HORVU.MOREX.r3.5HG0512730	3.58119869696979	0.0161030795957963	5H	532310289	532311600	-	C2H2-type domain-containing protein
HORVU.MOREX.r3.6HG0593620	3.90951568500726	0.0162268667120508	6H	352312308	352314885	+	S-adenosylmethionine decarboxylase proenzyme (EC 4.1.1.50)
HORVU.MOREX.r3.7HG0739460	3.8976983320981	0.016271322683468	7H	602303623	602304270	-	Histone H2B
HORVU.MOREX.r3.1HG0021350	3.88496551563919	0.0163690675599553	1H	77855598	77856691	+	glutathione transferase (EC 2.5.1.18)
HORVU.MOREX.r3.1HG0062680	3.8887007967755	0.0163690675599553	1H	415083049	415085901	-	Gibberellin hormone receptor (Predicted protein)
HORVU.MOREX.r3.4HG0383530	2.33794852340031	0.0163690675599553	4H	440072479	440173196	-	Bet v I/Major latex protein domain-containing protein
HORVU.MOREX.r3.5HG0432720	3.95802779506551	0.0163690675599553	5H	39874368	39874713	+	Uncharacterized protein
HORVU.MOREX.r3.5HG0510060	3.56137095739224	0.0163690675599553	5H	525821589	525822426	-	Histone H2B
HORVU.MOREX.r3.6HG0627570	3.88496551563919	0.0163690675599553	6H	547151028	547152964	+	Uncharacterized protein
HORVU.MOREX.r3.6HG0629240	3.58144104038046	0.0163690675599553	6H	552291314	552293002	-	O-methyltransferase ZRP4
HORVU.MOREX.r3.7HG0642360	3.88288060509233	0.0163690675599553	7H	14813487	14815418	-	BAG domain-containing protein
HORVU.MOREX.r3.6HG0601540	3.56121618405357	0.0164060162327958	6H	417222540	417225450	+	methionine adenosyltransferase (EC 2.5.1.6)
HORVU.MOREX.r3.1HG0060300	3.88671745155557	0.0164255552827622	1H	401891314	401894607	-	Nucleolar protein 16
HORVU.MOREX.r3.2HG0138690	3.88703475819303	0.0164466920505859	2H	197949364	197951806	+	X8 domain-containing protein
HORVU.MOREX.r3.2HG0182020	3.88836504487996	0.0164773558879713	2H	560378898	560381626	-	Phenylalanine ammonia-lyase (EC 4.3.1.24)
HORVU.MOREX.r3.3HG0308820	3.88066107600418	0.0164773558879713	3H	568401122	568407674	+	Dolichyl-diphosphooligosaccharide--protein glycosyltransferase subunit 2 (Ribophorin-2)
HORVU.MOREX.r3.5HG0510940	3.88030394558539	0.0164773558879713	5H	527496289	527497312	-	HMG-Y-related protein A (High mobility group A protein)
HORVU.MOREX.r3.7HG0718710	3.87955529593175	0.0164773558879713	7H	519920926	519924353	+	Uncharacterized protein
HORVU.MOREX.r3.5HG0508190	3.88134287330251	0.0165111108073426	5H	521109588	521113104	+	pyruvate dehydrogenase (acetyl-transferring) (EC 1.2.4.1)
HORVU.MOREX.r3.2HG0153420	3.90014300313291	0.0165520253305735	2H	356220111	356246983	-	Ig-like domain-containing protein
HORVU.MOREX.r3.4HG0399600	3.87285864186179	0.0165520253305735	4H	548702487	548708765	+	COP9 signalosome complex subunit 4
HORVU.MOREX.r3.4HG0417320	3.88987294670929	0.0165520253305735	4H	606213676	606216122	+	Predicted protein
HORVU.MOREX.r3.5HG0470130	3.87524824996694	0.0165520253305735	5H	365295535	365307938	-	4-coumarate--CoA ligase (EC 6.2.1.12)
HORVU.MOREX.r3.6HG0624650	3.87411907341318	0.0165520253305735	6H	540939643	540942112	-	Transmembrane 9 superfamily member
HORVU.MOREX.r3.7HG0705330	3.87240114058877	0.0165520253305735	7H	431299305	431301309	+	Predicted protein
HORVU.MOREX.r3.1HG0086090	3.87979594821511	0.0165645915995051	1H	496941816	496949155	-	E2 ubiquitin-conjugating enzyme (EC 2.3.2.23)
HORVU.MOREX.r3.4HG0357170	3.87183658312036	0.0167058120456962	4H	152263293	152272583	+	Predicted protein
HORVU.MOREX.r3.7HG0718830	3.86908713102094	0.0167058120456962	7H	520570018	520571834	+	Predicted protein
HORVU.MOREX.r3.4HG0347360	3.87406013998747	0.0167806689238633	4H	76085191	76087425	+	NAC transcription factor (Predicted protein)
HORVU.MOREX.r3.6HG0554700	3.86473756271887	0.0168059157429612	6H	41137049	41142582	+	CRAL-TRIO domain-containing protein
HORVU.MOREX.r3.4HG0398980	3.86411769544676	0.0168226386974326	4H	545511006	545515513	+	ADP-ribosylation factor-like protein 8B
HORVU.MOREX.r3.5HG0432690	3.55414621410141	0.0168226386974326	5H	39780861	39781282	+	Predicted protein
HORVU.MOREX.r3.2HG0127050	3.88632516919743	0.0168315743649891	2H	109573405	109574199	+	Predicted protein
HORVU.MOREX.r3.3HG0301430	3.86135148388862	0.0168335441936706	3H	545587230	545588629	+	Transcription factor MYBS1 (Myb-related protein S1)
HORVU.MOREX.r3.2HG0141200	3.86439445441931	0.0169939291620317	2H	214515181	214518402	-	Uncharacterized protein
HORVU.MOREX.r3.3HG0273340	3.8595955184423	0.0169939291620317	3H	378634375	378637525	-	Protein ABIL1
HORVU.MOREX.r3.5HG0511610	3.85675909629301	0.0169939291620317	5H	529230722	529234167	+	Predicted protein
HORVU.MOREX.r3.1HG0081730	3.86728363755834	0.0170052304142407	1H	489079338	489082944	-	Hyaluronan/mRNA-binding protein domain-containing protein
HORVU.MOREX.r3.4HG0335000	3.85294436129775	0.0171332693872243	4H	10274096	10276647	+	Costars family protein
HORVU.MOREX.r3.4HG0337190	3.85069607561489	0.0171504706988821	4H	17537579	17542004	+	Predicted protein
HORVU.MOREX.r3.4HG0338160	3.85069607561489	0.0171504706988821	4H	21406328	21430663	+	TOG domain-containing protein
HORVU.MOREX.r3.4HG0340820	3.85548613816552	0.0171636529630781	4H	31504280	31509357	+	Serine hydroxymethyltransferase (EC 2.1.2.1)
HORVU.MOREX.r3.1HG0090140	3.8554648082288	0.0172245500677412	1H	504548341	504550827	+	Uncharacterized protein
HORVU.MOREX.r3.1HG0066680	3.90574193863267	0.0172314123495852	1H	435271849	435272561	+	Bowman-Birk serine protease inhibitors family domain-containing protein
HORVU.MOREX.r3.3HG0282780	3.86209321828491	0.0172314123495852	3H	450049990	450054996	-	VIP1 protein
HORVU.MOREX.r3.1HG0013820	3.84606924995769	0.0172350259408725	1H	35124575	35128776	+	DUF4005 domain-containing protein
HORVU.MOREX.r3.4HG0400070	3.86402363428444	0.0172350259408725	4H	550631071	550634939	-	PCI domain-containing protein
HORVU.MOREX.r3.1HG0030650	3.86638139806575	0.0172782946930241	1H	150295498	150299285	+	non-specific serine/threonine protein kinase (EC 2.7.11.1)
HORVU.MOREX.r3.2HG0182080	3.52731384408	0.0172782946930241	2H	560599100	560601749	+	Phenylalanine ammonia-lyase (EC 4.3.1.24)
HORVU.MOREX.r3.2HG0182090	3.52731384408	0.0172782946930241	2H	560662549	560665232	-	Phenylalanine ammonia-lyase (EC 4.3.1.24)
HORVU.MOREX.r3.3HG0237640	3.84996655533472	0.0172782946930241	3H	53255458	53262482	+	E2 ubiquitin-conjugating enzyme (EC 2.3.2.23)
HORVU.MOREX.r3.3HG0241720	2.7363512063619	0.0172782946930241	3H	80453000	80457216	+	Phospholipase D (EC 3.1.4.4)
HORVU.MOREX.r3.5HG0502000	3.84137824684595	0.0172782946930241	5H	508493884	508503254	-	MaoC-like domain-containing protein
HORVU.MOREX.r3.6HG0613020	3.84222785619615	0.0172782946930241	6H	493990114	493992321	+	EF-hand domain-containing protein
HORVU.MOREX.r3.7HG0698110	3.52222913558232	0.0172782946930241	7H	366737824	366743758	-	Cellulose synthase-like CslF6 (Predicted protein)
HORVU.MOREX.r3.7HG0698250	3.53343914312482	0.0172782946930241	7H	367882654	367885544	+	NADH dehydrogenase [ubiquinone] iron-sulfur protein 6, mitochondrial
HORVU.MOREX.r3.7HG0725440	-2.3116370143759	0.0172782946930241	7H	557502977	557506072	-	Uncharacterized protein
HORVU.MOREX.r3.6HG0572880	3.83995345514233	0.0172939567379003	6H	144770951	144777264	+	Predicted protein
HORVU.MOREX.r3.6HG0603820	3.84477067995785	0.0173852366662425	6H	440439976	440444079	+	RmlD-like substrate binding domain-containing protein
HORVU.MOREX.r3.5HG0500590	3.83662950658973	0.0174285281328508	5H	504882886	504887016	+	non-specific serine/threonine protein kinase (EC 2.7.11.1)
HORVU.MOREX.r3.6HG0629820	3.83976419007619	0.01746767479508	6H	554100638	554106086	-	Probable voltage-gated potassium channel subunit beta (K(+) channel subunit beta)
HORVU.MOREX.r3.1HG0054020	-1.25689534449381	0.0174705615665985	1H	360814893	360817914	+	Methyltransferase (EC 2.1.1.-)
HORVU.MOREX.r3.7HG0688870	3.8389072118251	0.0175201662414748	7H	247501429	247504350	-	monodehydroascorbate reductase (NADH) (EC 1.6.5.4)
HORVU.MOREX.r3.3HG0288930	3.83182836400855	0.0175930291613352	3H	486802697	486807262	+	Predicted protein
HORVU.MOREX.r3.6HG0574510	3.83259637991118	0.0176044976392254	6H	158651548	158657450	+	glucomannan 4-beta-mannosyltransferase (EC 2.4.1.32)
HORVU.MOREX.r3.3HG0285920	3.85783268184831	0.0176503589268825	3H	467945130	467950523	+	Proteasome subunit alpha type
HORVU.MOREX.r3.1HG0054200	2.75697203279226	0.0176526869750976	1H	362152728	362155940	-	Predicted protein
HORVU.MOREX.r3.4HG0409910	3.84366075395568	0.0176526869750976	4H	587466993	587476092	+	Uncharacterized protein
HORVU.MOREX.r3.5HG0494320	3.83398899138033	0.0176526869750976	5H	488624159	488625666	-	NTF2 domain-containing protein
HORVU.MOREX.r3.6HG0605330	3.83990378433456	0.0176526869750976	6H	450382333	450388531	+	Acetylornithine deacetylase (EC 3.5.1.16) (N-acetylornithinase)
HORVU.MOREX.r3.3HG0296490	3.51070184025023	0.0176585533306666	3H	524691119	524695080	-	NADH-cytochrome b5 reductase (EC 1.6.2.2)
HORVU.MOREX.r3.5HG0463430	3.82679839842768	0.0176585533306666	5H	315464415	315467867	+	V-type proton ATPase subunit S1/VOA1 transmembrane domain-containing protein
HORVU.MOREX.r3.6HG0595580	3.82534668666498	0.0176585533306666	6H	370798922	370800767	+	Ammonium transporter
HORVU.MOREX.r3.5HG0498210	3.82442499828394	0.01766464959812	5H	497520764	497523586	+	Probable 6-phosphogluconolactonase (EC 3.1.1.31)
HORVU.MOREX.r3.1HG0089170	3.82806244347314	0.0177268272129718	1H	502618027	502621339	-	Predicted protein
HORVU.MOREX.r3.1HG0055340	3.8209385751961	0.017842409301206	1H	369171469	369174255	-	Magnesium transporter
HORVU.MOREX.r3.7HG0703780	3.82171398184244	0.0178540243801638	7H	417098143	417101250	+	Succinate dehydrogenase [ubiquinone] iron-sulfur subunit, mitochondrial (EC 1.3.5.1)
HORVU.MOREX.r3.3HG0310210	3.82299418499991	0.0179050677486311	3H	573217383	573221932	-	Acyl-[acyl-carrier-protein] desaturase
HORVU.MOREX.r3.6HG0553760	3.50423605513522	0.0179050677486311	6H	36977920	36981904	-	Mitochondrial ATP synthase
HORVU.MOREX.r3.1HG0063630	3.82209287863485	0.0179390019445806	1H	419354306	419355688	-	chitinase (EC 3.2.1.14)
HORVU.MOREX.r3.2HG0099260	3.81565976135173	0.0179390019445806	2H	9542528	9545594	+	Predicted protein
HORVU.MOREX.r3.4HG0373780	3.81584385226616	0.0179390019445806	4H	340992291	340996093	+	14-3-3E (Predicted protein)
HORVU.MOREX.r3.5HG0492560	3.82512434802098	0.0179390019445806	5H	483639644	483641434	+	FAD dependent oxidoreductase domain-containing protein
HORVU.MOREX.r3.6HG0548070	3.81525596486158	0.0179390019445806	6H	20381172	20385900	+	GST C-terminal domain-containing protein
HORVU.MOREX.r3.4HG0361130	3.81516135237376	0.0179602142199442	4H	186854524	186859914	-	3-ketoacyl-CoA synthase (EC 2.3.1.-)
HORVU.MOREX.r3.6HG0622490	3.81714270095517	0.0180002618858284	6H	533551710	533555538	+	Eukaryotic translation initiation factor 3 subunit G (eIF3g) (Eukaryotic translation initiation factor 3 RNA-binding subunit) (eIF-3 RNA-binding subunit) (Eukaryotic translation initiation factor 3 subunit 4)
HORVU.MOREX.r3.1HG0017750	3.83748614053322	0.0180104306317166	1H	56658190	56662310	+	non-specific serine/threonine protein kinase (EC 2.7.11.1)
HORVU.MOREX.r3.4HG0343050	3.82432578072934	0.0180104306317166	4H	43678795	43682874	-	Probable N-acetyl-gamma-glutamyl-phosphate reductase, chloroplastic (EC 1.2.1.38) (N-acetyl-glutamate semialdehyde dehydrogenase)
HORVU.MOREX.r3.5HG0495890	3.49491728220484	0.0180104306317166	5H	491469453	491470266	-	Ferredoxin
HORVU.MOREX.r3.5HG0505770	3.8170510057223	0.0180104306317166	5H	516669884	516672857	+	Predicted protein
HORVU.MOREX.r3.5HG0519720	3.81066036100581	0.0180104306317166	5H	548716998	548722615	-	Lysine--tRNA ligase (EC 6.1.1.6) (Lysyl-tRNA synthetase)
HORVU.MOREX.r3.5HG0514560	3.80999335713012	0.0180444913188482	5H	537499679	537505620	+	Citrate synthase
HORVU.MOREX.r3.2HG0197710	3.87481609544766	0.0180714528774128	2H	619229947	619230574	-	Histone H4
HORVU.MOREX.r3.7HG0639080	3.81843100750695	0.0180714528774128	7H	8150876	8155799	-	Extra-large guanine nucleotide-binding protein 3
HORVU.MOREX.r3.6HG0558540	3.80410370343353	0.018248560159978	6H	59248590	59252948	+	RNA helicase (EC 3.6.4.13)
HORVU.MOREX.r3.7HG0689220	1.32475057459686	0.018248560159978	7H	251032059	251034376	+	Ribosomal protein
HORVU.MOREX.r3.3HG0310660	3.7992874548603	0.018436635496646	3H	574498003	574501304	+	Exocyst subunit Exo70 family protein
HORVU.MOREX.r3.3HG0234210	3.79817294839451	0.0184960579084843	3H	35168970	35174467	-	non-specific serine/threonine protein kinase (EC 2.7.11.1)
HORVU.MOREX.r3.5HG0443720	3.80142904523886	0.0185912519762172	5H	107501256	107503695	+	Predicted protein
HORVU.MOREX.r3.5HG0509180	3.79223034840797	0.0185912519762172	5H	523346701	523349702	+	Prefoldin subunit 4
HORVU.MOREX.r3.5HG0531680	3.79176381048408	0.0185912519762172	5H	575058366	575061977	-	Uncharacterized protein
HORVU.MOREX.r3.7HG0717720	3.79223034840797	0.0185912519762172	7H	512182952	512188756	-	T-complex protein 1 subunit epsilon (CCT-epsilon)
HORVU.MOREX.r3.1HG0065100	-1.64666891138368	0.0186288774983273	1H	427306764	427312861	+	DNA replication licensing factor MCM2 (EC 3.6.4.12) (DNA replication licensing factor mcm2) (Minichromosome maintenance protein 2)
HORVU.MOREX.r3.3HG0241540	3.80953067029233	0.0186288774983273	3H	79498065	79500595	+	Predicted protein
HORVU.MOREX.r3.7HG0712350	1.56038653776048	0.0186288774983273	7H	478891681	478893966	+	HMA domain-containing protein
HORVU.MOREX.r3.3HG0291910	3.7876996258327	0.018787912690008	3H	502650507	502651942	+	Peroxidase (EC 1.11.1.7)
HORVU.MOREX.r3.3HG0250450	3.78431776506085	0.0188443871712116	3H	149018559	149024351	+	Pollen Ole e 1 allergen and extensin family protein
HORVU.MOREX.r3.2HG0111450	3.47275005744456	0.0188684352802929	2H	36474364	36476232	-	Uncharacterized protein
HORVU.MOREX.r3.1HG0053610	3.78618952593049	0.0188795843291952	1H	358404736	358407626	+	Xyloglucan endotransglucosylase/hydrolase (EC 2.4.1.207)
HORVU.MOREX.r3.1HG0004880	3.7805312641194	0.0188947772675673	1H	9612053	9614384	-	Predicted protein
HORVU.MOREX.r3.1HG0057610	3.7805312641194	0.0188947772675673	1H	383482182	383484579	-	peptide-methionine (S)-S-oxide reductase (EC 1.8.4.11) (Peptide-methionine (S)-S-oxide reductase) (Protein-methionine-S-oxide reductase)
HORVU.MOREX.r3.1HG0094820	3.7957293011473	0.0188947772675673	1H	514735627	514739868	+	V-type proton ATPase subunit C
HORVU.MOREX.r3.5HG0530200	2.69355404819182	0.0188947772675673	5H	571763472	571767226	-	Actin
HORVU.MOREX.r3.7HG0704320	3.47280031726978	0.0190051780013295	7H	421560542	421561420	+	Predicted protein
HORVU.MOREX.r3.1HG0027640	3.84167492082624	0.0190202930746564	1H	124407888	124408579	+	Predicted protein
HORVU.MOREX.r3.3HG0301390	3.77686601179692	0.0190971883320636	3H	545405976	545407403	-	Predicted protein
HORVU.MOREX.r3.1HG0095230	3.77801410427507	0.0191185393974613	1H	515756636	515760620	-	CCT domain-containing protein
HORVU.MOREX.r3.2HG0159040	-2.32013932006039	0.0191185393974613	2H	403487567	403489877	-	BHLH domain-containing protein
HORVU.MOREX.r3.5HG0460160	3.77764445462431	0.0191185393974613	5H	289046744	289052162	-	ACT domain-containing protein ACR (Protein ACT DOMAIN REPEATS)
HORVU.MOREX.r3.7HG0739480	3.77871489810944	0.0191874224213282	7H	602316451	602317076	-	Histone H2B
HORVU.MOREX.r3.5HG0436210	-1.99856771970977	0.0192474063354459	5H	53481609	53481906	-	Uncharacterized protein
HORVU.MOREX.r3.7HG0738430	3.77934968918623	0.0194419755790712	7H	599947630	599948332	-	Bifunctional inhibitor/plant lipid transfer protein/seed storage helical domain-containing protein
HORVU.MOREX.r3.6HG0562710	-2.83967971790919	0.0195300734556832	6H	82254640	82254937	-	Uncharacterized protein
HORVU.MOREX.r3.7HG0704850	3.76666934105747	0.0195520748818854	7H	427126650	427131409	+	Predicted protein
HORVU.MOREX.r3.4HG0396540	3.76160755604171	0.0195575756724666	4H	533965998	533969296	+	Sugar phosphate transporter domain-containing protein
HORVU.MOREX.r3.2HG0145140	2.6991175213282	0.0195778231774163	2H	258169785	258173208	+	Predicted protein
HORVU.MOREX.r3.1HG0087990	3.76039300566618	0.0196582266779367	1H	500275901	500276659	-	Predicted protein
HORVU.MOREX.r3.1HG0093710	3.75726527912334	0.0196582266779367	1H	512323867	512328006	-	Predicted protein
HORVU.MOREX.r3.3HG0252850	3.76802857211057	0.0196582266779367	3H	168882427	168886962	+	Importin subunit alpha
HORVU.MOREX.r3.6HG0543730	3.45078212096248	0.0196582266779367	6H	13482434	13483042	-	Histone H2B
HORVU.MOREX.r3.2HG0200640	3.78722725613474	0.0197422739218536	2H	624396343	624399916	-	Carboxypeptidase (EC 3.4.16.-)
HORVU.MOREX.r3.4HG0339730	3.75812507982561	0.0197422739218536	4H	27054034	27057938	-	Peptidase C1A papain C-terminal domain-containing protein
HORVU.MOREX.r3.3HG0302230	3.77186062928226	0.0197455451124024	3H	548573733	548576043	+	Predicted protein
HORVU.MOREX.r3.6HG0562790	-3.82633355109714	0.0198641546245498	6H	82284145	82284442	-	Uncharacterized protein
HORVU.MOREX.r3.5HG0528290	3.74811396321735	0.0200838289123699	5H	567593259	567596678	+	Late embryogenesis abundant protein LEA-2 subgroup domain-containing protein
HORVU.MOREX.r3.5HG0472040	3.74965061135529	0.0201607709229513	5H	382459166	382461236	+	Predicted protein
HORVU.MOREX.r3.4HG0332520	3.7406925257786	0.0202640446171178	4H	3361148	3364547	-	Histidine-containing phosphotransfer protein
HORVU.MOREX.r3.4HG0349520	3.7491839715418	0.0202640446171178	4H	92987204	92988947	-	Predicted protein
HORVU.MOREX.r3.4HG0418190	3.43101708807729	0.0202640446171178	4H	608473461	608475421	+	Peptidase C14 caspase domain-containing protein
HORVU.MOREX.r3.5HG0535420	3.74117434988603	0.0202640446171178	5H	581767981	581773717	+	Transcription factor CBF/NF-Y/archaeal histone domain-containing protein
HORVU.MOREX.r3.3HG0254430	3.73849637618132	0.0203581797311195	3H	180649258	180652423	+	Uncharacterized protein
HORVU.MOREX.r3.5HG0482390	3.73786408546904	0.0203891233365581	5H	440713561	440715670	-	Predicted protein
HORVU.MOREX.r3.5HG0494010	3.74386177896603	0.020402253404448	5H	487085784	487089540	-	Ribulose-phosphate 3-epimerase (EC 5.1.3.1)
HORVU.MOREX.r3.6HG0607930	3.73409240941701	0.0204942125641005	6H	465742584	465745494	+	Predicted protein
HORVU.MOREX.r3.2HG0192890	3.74594851857029	0.0205540361816335	2H	606313852	606316585	+	Xyloglucan endotransglucosylase/hydrolase (EC 2.4.1.207)
HORVU.MOREX.r3.4HG0412360	3.75642954857717	0.0206239380528767	4H	594360070	594364210	+	Predicted protein
HORVU.MOREX.r3.1HG0050090	3.72950137222142	0.0206518347923253	1H	333666250	333669077	-	Predicted protein
HORVU.MOREX.r3.4HG0370860	3.72901341123625	0.0206518347923253	4H	310826004	310830474	+	Proteasome subunit alpha type
HORVU.MOREX.r3.4HG0417380	3.72950137222142	0.0206518347923253	4H	606450069	606453886	+	Small nuclear ribonucleoprotein Sm D3 (Sm-D3) (snRNP core protein D3)
HORVU.MOREX.r3.5HG0465820	3.72850095681671	0.0206518347923253	5H	332678960	332690195	-	Clathrin heavy chain
HORVU.MOREX.r3.1HG0089160	3.73023930072912	0.020668909670788	1H	502615529	502617615	-	Eukaryotic translation initiation factor 3 subunit D (eIF3d) (Eukaryotic translation initiation factor 3 subunit 7) (eIF-3-zeta)
HORVU.MOREX.r3.6HG0568900	3.73203603191638	0.0206784155889764	6H	115661435	115662119	-	Histone H3
HORVU.MOREX.r3.2HG0195610	3.73951613612378	0.0207735085053926	2H	613294292	613296072	+	Germin-like protein
HORVU.MOREX.r3.6HG0592610	3.7254604958851	0.0207938508341468	6H	343560809	343563589	+	Predicted protein
HORVU.MOREX.r3.3HG0284330	3.73342778728375	0.0208264003190734	3H	459322412	459328493	+	Glycine cleavage system P protein (EC 1.4.4.2)
HORVU.MOREX.r3.3HG0312640	3.72473289167315	0.0208264003190734	3H	581504635	581506119	+	Uncharacterized protein
HORVU.MOREX.r3.6HG0567800	3.74226945319566	0.0208289330493644	6H	110068361	110078490	-	Predicted protein
HORVU.MOREX.r3.3HG0236100	3.72707365925209	0.0209392161462131	3H	41894904	41896453	+	Late embryogenesis abundant protein LEA-2 subgroup domain-containing protein
HORVU.MOREX.r3.3HG0309270	3.73004973248335	0.0209392161462131	3H	569805712	569813401	+	proline--tRNA ligase (EC 6.1.1.15) (Prolyl-tRNA synthetase)
HORVU.MOREX.r3.7HG0638550	3.72313169444541	0.0209392161462131	7H	7361896	7366080	-	Predicted protein
HORVU.MOREX.r3.2HG0139260	3.77086850017844	0.0210091494581017	2H	201405596	201412243	-	NUC153 domain-containing protein
HORVU.MOREX.r3.1HG0027490	3.7149695743272	0.0211124604936535	1H	122985176	122985976	+	Predicted protein
HORVU.MOREX.r3.1HG0093550	3.7776344060794	0.0211329533099994	1H	511775676	511779052	+	Tryptophan synthase
HORVU.MOREX.r3.3HG0273250	3.7203367282306	0.0211786409911105	3H	377463524	377468851	+	Predicted protein
HORVU.MOREX.r3.5HG0535920	3.71249937754266	0.0212033218979276	5H	582539470	582540354	+	Gamma-glutamylcyclotransferase family protein
HORVU.MOREX.r3.5HG0433470	3.73438866218191	0.0212508762940452	5H	44643410	44647049	+	Auxin-responsive protein
HORVU.MOREX.r3.7HG0730870	3.41638667720157	0.0213427962523257	7H	579202343	579206337	-	Glycosyltransferases (EC 2.4.-.-)
HORVU.MOREX.r3.1HG0078770	3.70763348965092	0.0214215941836274	1H	482061108	482065495	-	Predicted protein
HORVU.MOREX.r3.2HG0189670	3.72119262176356	0.0214215941836274	2H	596172198	596173384	+	Tonoplast intrinsic protein
HORVU.MOREX.r3.3HG0268100	3.40118103943634	0.0214215941836274	3H	333452839	333456613	-	Glycerophosphocholine acyltransferase 1
HORVU.MOREX.r3.6HG0629510	3.70729656014955	0.0214215941836274	6H	552870490	552876662	-	Acetyl-coenzyme A synthetase (EC 6.2.1.1)
HORVU.MOREX.r3.3HG0273630	3.70425663308028	0.0214329817225066	3H	382765792	382766435	-	Mitochondrial import receptor subunit TOM7-1
HORVU.MOREX.r3.7HG0660830	3.70652653280986	0.0214331370735243	7H	65062286	65067433	-	E2 ubiquitin-conjugating enzyme (EC 2.3.2.23)
HORVU.MOREX.r3.1HG0052880	3.70570519344992	0.0215047634234471	1H	352842934	352845784	+	Predicted protein
HORVU.MOREX.r3.1HG0079250	3.70951254058781	0.0215724434584232	1H	483379148	483379969	-	Histone H2B
HORVU.MOREX.r3.3HG0304380	3.700122018942	0.0217288450402988	3H	555783161	555785845	-	WRKY domain-containing protein
HORVU.MOREX.r3.1HG0077640	3.70292109836278	0.0217864189184789	1H	479245076	479249860	-	Tubby-like F-box protein
HORVU.MOREX.r3.5HG0524690	3.69602408119846	0.0217996815500442	5H	559721721	559724786	-	Transcription elongation factor
HORVU.MOREX.r3.6HG0548480	3.72371227888648	0.0218231745512936	6H	21913752	21914595	+	Histone H2A
HORVU.MOREX.r3.6HG0619260	3.72489970028317	0.0218337582459507	6H	523436350	523439179	+	GOLD domain-containing protein
HORVU.MOREX.r3.7HG0716880	3.69566168519129	0.0218337582459507	7H	505608558	505613862	+	Vacuolar proton pump subunit B (V-ATPase subunit B) (Vacuolar proton pump subunit B)
HORVU.MOREX.r3.5HG0486070	3.69450620631238	0.0218764670876237	5H	457960545	457965030	+	Aminotransferase class I/classII large domain-containing protein
HORVU.MOREX.r3.1HG0006610	2.68309666694251	0.0218803160179882	1H	13953185	13954051	+	Histone H2A
HORVU.MOREX.r3.1HG0084340	3.73578443036369	0.0218803160179882	1H	494084392	494086363	-	Predicted protein
HORVU.MOREX.r3.5HG0534120	3.38828551809116	0.0220303942218136	5H	579405016	579406197	-	Uncharacterized protein
HORVU.MOREX.r3.4HG0418890	3.4351534672303	0.0220370832250168	4H	609867202	609868120	+	Germin-like protein
HORVU.MOREX.r3.6HG0610230	3.69529850001393	0.0220971323844205	6H	480515383	480517301	-	Uncharacterized protein
HORVU.MOREX.r3.7HG0698910	3.69820938182001	0.0220971323844205	7H	373204044	373210382	-	Myb-like domain-containing protein
HORVU.MOREX.r3.2HG0132140	3.38690257046422	0.0221198689229687	2H	146164463	146175011	+	Predicted protein
HORVU.MOREX.r3.1HG0034330	3.68717032317323	0.0221217075735965	1H	186784832	186808944	-	procollagen-proline 4-dioxygenase (EC 1.14.11.2)
HORVU.MOREX.r3.2HG0124560	3.68717032317323	0.0221217075735965	2H	95787677	95790223	-	Predicted protein
HORVU.MOREX.r3.4HG0343990	3.71805294593345	0.0221217075735965	4H	49773136	49774553	+	F-box domain-containing protein
HORVU.MOREX.r3.5HG0497530	3.69843034154314	0.0221217075735965	5H	495010167	495011297	+	C-repeat binding factor 9 (CBF9) (CRT/DRE binding factor 9)
HORVU.MOREX.r3.2HG0096450	3.69416665605531	0.0221328596257255	2H	2354448	2356603	-	Peptidyl-prolyl cis-trans isomerase (EC 5.2.1.8)
HORVU.MOREX.r3.6HG0590780	3.68068716857645	0.02218798183994	6H	326088691	326094197	-	Protein NBR1 homolog
HORVU.MOREX.r3.6HG0610500	3.6852659984666	0.0223016944012801	6H	481558717	481563759	-	Peptidase A1 domain-containing protein
HORVU.MOREX.r3.1HG0063930	-2.24755867293609	0.0224719980150636	1H	420845188	420849098	+	Protein WEAK CHLOROPLAST MOVEMENT UNDER BLUE LIGHT 1
HORVU.MOREX.r3.7HG0719440	3.6874965759882	0.0224719980150636	7H	524660902	524664487	-	heme oxygenase (biliverdin-producing) (EC 1.14.14.18)
HORVU.MOREX.r3.1HG0082570	3.67370892465926	0.0224830639282684	1H	490564238	490565854	-	Glycosyltransferase (EC 2.4.1.-)
HORVU.MOREX.r3.5HG0488170	3.67965949336899	0.0224840282674049	5H	468899207	468900838	+	Homeobox-leucine zipper protein (HD-ZIP protein) (Homeodomain transcription factor)
HORVU.MOREX.r3.6HG0552970	3.67888442120491	0.0225253649331861	6H	34991300	34991749	-	NADH dehydrogenase [ubiquinone] 1 beta subcomplex subunit 3-B
HORVU.MOREX.r3.5HG0517300	3.67169796746394	0.0225969965817394	5H	543416190	543425502	-	aldehyde oxidase (EC 1.2.3.1)
HORVU.MOREX.r3.2HG0138210	3.66900536642437	0.0226487039531547	2H	192000496	192007206	-	isopentenyl-diphosphate Delta-isomerase (EC 5.3.3.2)
HORVU.MOREX.r3.1HG0009930	3.7008611810787	0.0226661471092427	1H	23153370	23154208	+	Bifunctional inhibitor/plant lipid transfer protein/seed storage helical domain-containing protein
HORVU.MOREX.r3.7HG0688720	3.67756407836219	0.0226661471092427	7H	246565598	246567301	+	NADH dehydrogenase [ubiquinone] iron-sulfur protein 5 (Complex I-15 kDa) (NADH-ubiquinone oxidoreductase 15 kDa subunit)
HORVU.MOREX.r3.5HG0524060	3.68499720025744	0.0226722477194406	5H	558423724	558426047	+	Remorin C-terminal domain-containing protein
HORVU.MOREX.r3.1HG0062630	3.67259276192102	0.022700561459379	1H	414575168	414578770	+	Lipase-like C-terminal domain-containing protein
HORVU.MOREX.r3.7HG0678130	3.37137621908381	0.022729216930188	7H	162335904	162337309	-	Predicted protein
HORVU.MOREX.r3.7HG0707530	3.67643182313454	0.022729216930188	7H	443803363	443806559	-	Uncharacterized protein
HORVU.MOREX.r3.7HG0725990	3.36676659781683	0.022729216930188	7H	560250011	560251396	-	Predicted protein
HORVU.MOREX.r3.5HG0433510	3.36960688872314	0.0227395968467629	5H	45199769	45201780	+	Auxin-responsive protein
HORVU.MOREX.r3.5HG0535360	3.66834217685455	0.0227395968467629	5H	581734902	581735704	-	Predicted protein
HORVU.MOREX.r3.6HG0539990	3.66362853704882	0.0227395968467629	6H	4342439	4346276	+	Predicted protein
HORVU.MOREX.r3.6HG0587280	3.66516772927848	0.0227395968467629	6H	293031882	293062516	-	Vacuolar protein sorting-associated protein 29
HORVU.MOREX.r3.5HG0517800	3.6658709096643	0.0227947756228767	5H	544701264	544705316	-	YTH domain-containing family protein
HORVU.MOREX.r3.7HG0711310	3.67084931306938	0.022857315883257	7H	471342348	471343656	+	Tonoplast intrinsic protein
HORVU.MOREX.r3.4HG0337120	3.66632884873327	0.0229456647807168	4H	17346880	17348201	-	Predicted protein
HORVU.MOREX.r3.7HG0725070	3.65907838727115	0.0230159255599327	7H	554916079	554920118	-	Peptidase A1 domain-containing protein
HORVU.MOREX.r3.3HG0228790	3.65950050266169	0.0230254686855171	3H	20107997	20111450	+	Mitochondrial glycoprotein
HORVU.MOREX.r3.4HG0404340	3.65552019879697	0.0230254686855171	4H	567080789	567081692	+	Ubiquitin-fold modifier-conjugating enzyme 1
HORVU.MOREX.r3.7HG0714100	3.65776303143076	0.0230513918184572	7H	490669213	490673239	-	Predicted protein
HORVU.MOREX.r3.6HG0544330	3.6535222835389	0.0231546699141245	6H	14492683	14493346	-	Predicted protein
HORVU.MOREX.r3.2HG0189190	3.65173705961959	0.0231799013173726	2H	594738041	594743161	+	Glucuronosyltransferase PGSIP8
HORVU.MOREX.r3.3HG0272160	3.65276706857775	0.0231799013173726	3H	371545798	371548130	-	NADP-dependent oxidoreductase domain-containing protein
HORVU.MOREX.r3.3HG0320230	3.65220938360064	0.0231799013173726	3H	596955766	596956773	+	glutathione transferase (EC 2.5.1.18)
HORVU.MOREX.r3.2HG0215550	3.66136785578106	0.0231862933853791	2H	658658198	658659434	+	Peroxidase (EC 1.11.1.7)
HORVU.MOREX.r3.6HG0623620	3.64959978857728	0.023200732999703	6H	536902938	536903804	+	Cytochrome b5 heme-binding domain-containing protein
HORVU.MOREX.r3.2HG0146530	3.35492138515756	0.0232706454627883	2H	276977144	276980155	+	ATP synthase subunit delta', mitochondrial (F-ATPase delta' subunit)
HORVU.MOREX.r3.6HG0630600	3.65429473514769	0.023279461526677	6H	555453438	555457386	-	RING-type E3 ubiquitin transferase (EC 2.3.2.27)
HORVU.MOREX.r3.4HG0333550	3.6538978412	0.023369892443722	4H	5880159	5883761	-	Predicted protein
HORVU.MOREX.r3.2HG0195580	3.64620836580354	0.023374679310614	2H	613235401	613239267	-	NAD(P)-binding domain-containing protein
HORVU.MOREX.r3.3HG0248280	3.64665373829895	0.023374679310614	3H	129256024	129258667	+	Reticulon-like protein
HORVU.MOREX.r3.3HG0308270	3.64421133820647	0.023374679310614	3H	567159178	567161843	+	Amino acid transporter transmembrane domain-containing protein
HORVU.MOREX.r3.6HG0570900	3.64612224561307	0.023374679310614	6H	130897724	130906873	-	Succinate-semialdehyde dehydrogenase (EC 1.2.1.24)
HORVU.MOREX.r3.2HG0138320	3.65278251925052	0.0234256331045345	2H	193496141	193497298	+	GH18 domain-containing protein
HORVU.MOREX.r3.1HG0080160	3.35822840454281	0.0234565315627254	1H	485527097	485529957	+	Predicted protein
HORVU.MOREX.r3.4HG0393860	3.66280120366635	0.0235084781218191	4H	515308634	515310481	+	Peroxidase (EC 1.11.1.7)
HORVU.MOREX.r3.3HG0250180	3.64862027550829	0.0235411680555747	3H	146979888	146982402	+	Single-stranded DNA binding protein Ssb-like OB fold domain-containing protein
HORVU.MOREX.r3.1HG0036930	3.64103427987418	0.0236569889732149	1H	220646472	220648203	+	Histone H2A
HORVU.MOREX.r3.7HG0653690	3.64241945485147	0.0237218819296142	7H	41778698	41784686	-	Sulfotransferase
HORVU.MOREX.r3.2HG0130310	3.63508625205397	0.023766400309907	2H	131181401	131189098	+	NADH dehydrogenase [ubiquinone] iron-sulfur protein 4, mitochondrial
HORVU.MOREX.r3.1HG0046510	3.64254758003899	0.0237964036171665	1H	306121886	306124326	+	Predicted protein
HORVU.MOREX.r3.4HG0338460	3.6331893137665	0.0237964036171665	4H	22691167	22695215	-	Predicted protein
HORVU.MOREX.r3.4HG0390230	3.6331893137665	0.0237964036171665	4H	489464602	489468772	+	Eukaryotic translation initiation factor NCBP (Novel cap-binding protein) (mRNA cap-binding protein)
HORVU.MOREX.r3.6HG0611880	3.6331893137665	0.0237964036171665	6H	488957624	488959887	+	Homeobox-leucine zipper protein (HD-ZIP protein) (Homeodomain transcription factor)
HORVU.MOREX.r3.1HG0075230	3.36401735088169	0.0240340816701952	1H	471774719	471775375	+	Histone H3
HORVU.MOREX.r3.2HG0196370	3.64349904091819	0.0240340816701952	2H	615881561	615882404	-	FLZ-type domain-containing protein
HORVU.MOREX.r3.3HG0280250	3.63609562144452	0.0240340816701952	3H	432422656	432424076	+	Probable purine permease
HORVU.MOREX.r3.3HG0301530	3.62611421195784	0.0240340816701952	3H	545755498	545760224	+	ethanolamine-phosphate cytidylyltransferase (EC 2.7.7.14) (CTP:phosphoethanolamine cytidylyltransferase)
HORVU.MOREX.r3.5HG0476550	3.69968810088858	0.0240340816701952	5H	408437273	408439627	+	Trehalose 6-phosphate phosphatase (EC 3.1.3.12)
HORVU.MOREX.r3.7HG0723200	3.67638144611162	0.0240340816701952	7H	546412115	546413307	-	Glutaredoxin-dependent peroxiredoxin (EC 1.11.1.25)
HORVU.MOREX.r3.1HG0021330	3.62884540142592	0.0241394151946561	1H	77792228	77796400	+	asparagine--tRNA ligase (EC 6.1.1.22)
HORVU.MOREX.r3.6HG0612960	3.33509163523398	0.0241828015024613	6H	493665452	493666712	+	Nudix hydrolase domain-containing protein
HORVU.MOREX.r3.7HG0733070	2.59663531979431	0.0243442145511792	7H	586537399	586540437	-	Predicted protein
HORVU.MOREX.r3.2HG0201770	3.63932093049992	0.0244750532293797	2H	627291753	627293748	+	U3 small nucleolar ribonucleoprotein protein IMP3 (30S ribosomal protein S4, chloroplastic) (U3 small nucleolar ribonucleoprotein protein imp3)
HORVU.MOREX.r3.3HG0295330	3.63062109539923	0.0244750532293797	3H	519013924	519015639	-	Sugar phosphate transporter domain-containing protein
HORVU.MOREX.r3.2HG0208280	3.63076200448434	0.0245101131492491	2H	643191970	643193164	+	Sulfotransferase (EC 2.8.2.-)
HORVU.MOREX.r3.6HG0606100	3.63076200448434	0.0245101131492491	6H	455306662	455309991	+	TOM1-like protein 2
HORVU.MOREX.r3.4HG0415490	3.61484008267956	0.0245586986117732	4H	602228318	602229180	+	Bifunctional inhibitor/plant lipid transfer protein/seed storage helical domain-containing protein
HORVU.MOREX.r3.7HG0728870	3.61282559296359	0.0245586986117732	7H	572757557	572759023	-	Xyloglucan endotransglucosylase/hydrolase (EC 2.4.1.207)
HORVU.MOREX.r3.7HG0745710	3.61388169086405	0.0245586986117732	7H	616215053	616218351	+	Uncharacterized protein
HORVU.MOREX.r3.4HG0338400	3.61528890603161	0.0245661896139504	4H	22553743	22554630	+	Histone H2B
HORVU.MOREX.r3.1HG0006570	3.61571887931559	0.0245836024365036	1H	13863345	13865640	+	ADF-H domain-containing protein
HORVU.MOREX.r3.2HG0186680	3.63146269310848	0.0246620401990937	2H	583287958	583288992	-	H15 domain-containing protein
HORVU.MOREX.r3.7HG0726360	3.61308050929197	0.0246930488660681	7H	562072374	562075744	+	Predicted protein
HORVU.MOREX.r3.5HG0518960	3.61586877825126	0.0247878841901404	5H	547252186	547255438	+	Predicted protein
HORVU.MOREX.r3.5HG0520930	3.6077146404051	0.0247878841901404	5H	551090233	551096606	+	Chloride channel protein
HORVU.MOREX.r3.5HG0490320	3.61792004651321	0.0249445582721383	5H	475834645	475836291	-	Eukaryotic translation initiation factor 3 subunit E (eIF3e) (Eukaryotic translation initiation factor 3 subunit 6)
HORVU.MOREX.r3.1HG0027090	3.6182226163073	0.0250396745057024	1H	119199676	119204005	+	Predicted protein
HORVU.MOREX.r3.1HG0053360	3.3187611657396	0.0251803554395967	1H	356413725	356417131	+	NADH dehydrogenase [ubiquinone] 1 beta subcomplex subunit 10-B
HORVU.MOREX.r3.3HG0257890	3.60329177940071	0.0251803554395967	3H	212489407	212496433	+	COP9 signalosome complex subunit 2
HORVU.MOREX.r3.5HG0434170	3.60108022875902	0.0251803554395967	5H	49273331	49283840	+	Ureidoglycolate hydrolase (EC 3.5.1.116)
HORVU.MOREX.r3.7HG0646880	3.60108022875902	0.0251803554395967	7H	22509646	22512855	-	Hypersensitive-induced reaction protein 4 (Predicted protein)
HORVU.MOREX.r3.2HG0194490	3.59586969764163	0.0253488807179517	2H	609925781	609929057	-	Predicted protein
HORVU.MOREX.r3.5HG0478840	3.59586969764163	0.0253488807179517	5H	422158274	422161080	+	Vacuolar iron transporter (VIT)
HORVU.MOREX.r3.6HG0628660	3.5966181181097	0.0254564564273549	6H	550737947	550739356	-	Predicted protein
HORVU.MOREX.r3.1HG0049910	3.59052601023232	0.0255425242172349	1H	332377087	332377951	+	Auxin-responsive protein SAUR32
HORVU.MOREX.r3.2HG0193410	3.30242988025885	0.0255425242172349	2H	607137879	607139988	+	V-type proton ATPase subunit G
HORVU.MOREX.r3.6HG0543800	3.59814210526969	0.0256938796137117	6H	13629530	13630355	-	Histone H2A
HORVU.MOREX.r3.6HG0572070	1.34614704862238	0.0257367584687662	6H	138377867	138381265	+	Phosphoglycerate kinase (EC 2.7.2.3)
HORVU.MOREX.r3.4HG0402160	3.58435214795479	0.0258323388089436	4H	559481519	559485416	+	Acireductone dioxygenase (Acireductone dioxygenase (Fe(2+)-requiring)) (ARD') (Fe-ARD) (EC 1.13.11.54) (Acireductone dioxygenase (Ni(2+)-requiring)) (ARD) (Ni-ARD) (EC 1.13.11.53)
HORVU.MOREX.r3.7HG0738440	3.59916961568362	0.0258448347056914	7H	599984350	599984975	-	Bifunctional inhibitor/plant lipid transfer protein/seed storage helical domain-containing protein
HORVU.MOREX.r3.2HG0100670	3.5817352114915	0.0259349919620209	2H	11990784	11993789	+	Eukaryotic translation initiation factor 3 subunit M (eIF3m)
HORVU.MOREX.r3.2HG0137420	3.58223026013121	0.0259349919620209	2H	186480868	186483471	-	Predicted protein
HORVU.MOREX.r3.5HG0438450	3.58121552551623	0.0259349919620209	5H	65554449	65561097	+	adenine phosphoribosyltransferase (EC 2.4.2.7)
HORVU.MOREX.r3.7HG0719860	3.58009121165044	0.0259388836045236	7H	526846490	526850093	+	Aspartic proteinase
HORVU.MOREX.r3.3HG0303300	3.29050963433215	0.0259406439238283	3H	552275581	552277633	+	Predicted protein
HORVU.MOREX.r3.5HG0425110	3.59181883291182	0.0259406439238283	5H	11027001	11031371	+	Cationic amino acid transporter C-terminal domain-containing protein
HORVU.MOREX.r3.3HG0320030	3.57813989941687	0.0259973251482418	3H	596522819	596529630	-	7-dehydrocholesterol reductase (EC 1.3.1.21) (Sterol Delta(7)-reductase)
HORVU.MOREX.r3.5HG0448780	3.57813989941687	0.0259973251482418	5H	152310497	152323817	+	Ureide permease
HORVU.MOREX.r3.1HG0073250	3.57740277970357	0.0260060326243952	1H	461579174	461582240	+	Coatomer subunit zeta
HORVU.MOREX.r3.3HG0280930	3.58100628722545	0.0260060326243952	3H	438524360	438525282	+	Uncharacterized protein
HORVU.MOREX.r3.7HG0638160	3.5886641763346	0.0260060326243952	7H	6871270	6875195	-	RRM domain-containing protein
HORVU.MOREX.r3.2HG0176670	3.58476657634306	0.0260583059995887	2H	533988162	533991023	+	26S proteasome regulatory subunit RPN7
HORVU.MOREX.r3.1HG0013220	3.5725644412648	0.0261127732019419	1H	32549487	32553080	-	Tetraspanin
HORVU.MOREX.r3.1HG0039110	3.57636256772847	0.0261127732019419	1H	245846975	245860099	+	Macro domain-containing protein
HORVU.MOREX.r3.3HG0235910	3.57680606103282	0.0261127732019419	3H	40271380	40272401	+	FAS1 domain-containing protein
HORVU.MOREX.r3.3HG0273620	3.59273183233358	0.0261127732019419	3H	382752552	382764884	+	Beta-adaptin-like protein
HORVU.MOREX.r3.4HG0415960	3.57577350125949	0.0261127732019419	4H	603672036	603690216	+	CCR4-NOT transcription complex subunit 1
HORVU.MOREX.r3.7HG0738530	3.57786657388659	0.0262783974662202	7H	600190501	600191080	-	Bifunctional inhibitor/plant lipid transfer protein/seed storage helical domain-containing protein
HORVU.MOREX.r3.3HG0240670	3.56688128377967	0.0264117535661119	3H	73215039	73215593	+	Histone H4
HORVU.MOREX.r3.2HG0177820	3.57668846626018	0.0264205052913435	2H	540189339	540191495	+	Mitochondrial pyruvate carrier
HORVU.MOREX.r3.7HG0670830	-2.57287577902766	0.0264683609493664	7H	117254253	117265245	+	Autophagy-related protein 2
HORVU.MOREX.r3.7HG0641060	3.57179925982732	0.0265174327836409	7H	11875036	11881364	+	Uncharacterized protein
HORVU.MOREX.r3.5HG0512430	3.60954248730913	0.0265209614822061	5H	531217228	531219867	-	protein-serine/threonine phosphatase (EC 3.1.3.16)
HORVU.MOREX.r3.6HG0551620	3.5741455512104	0.0267523603698538	6H	30718789	30723020	+	Uncharacterized protein
HORVU.MOREX.r3.3HG0265190	3.2714208577874	0.0267702583982636	3H	300767481	300781365	+	Predicted protein
HORVU.MOREX.r3.3HG0266440	3.55858456053189	0.0267702583982636	3H	314507699	314519769	-	Ubiquitin carboxyl-terminal hydrolase (EC 3.4.19.12)
HORVU.MOREX.r3.6HG0555660	3.27244903671741	0.0267702583982636	6H	45253181	45256807	+	Calnexin
HORVU.MOREX.r3.1HG0073650	3.26947678394339	0.0268710799535886	1H	463702796	463703542	+	Predicted protein
HORVU.MOREX.r3.4HG0409180	3.55706839173271	0.0268710799535886	4H	585417933	585419184	+	glutathione transferase (EC 2.5.1.18)
HORVU.MOREX.r3.5HG0467810	3.27003054362326	0.0268710799535886	5H	346938110	346944481	+	aspartate--tRNA ligase (EC 6.1.1.12)
HORVU.MOREX.r3.5HG0533660	3.56480235193914	0.0268710799535886	5H	578333154	578339504	+	Predicted protein
HORVU.MOREX.r3.1HG0044310	3.26804058327946	0.0268727851701355	1H	289677509	289679938	-	Nascent polypeptide-associated complex subunit beta
HORVU.MOREX.r3.4HG0383820	3.55523029860559	0.0268727851701355	4H	442972885	442973979	+	Uncharacterized protein
HORVU.MOREX.r3.4HG0390430	3.5562308680866	0.0268727851701355	4H	490792351	490799057	-	J domain-containing protein
HORVU.MOREX.r3.5HG0430880	3.55668470536358	0.0269093444800117	5H	30500679	30503818	-	Uncharacterized protein
HORVU.MOREX.r3.2HG0152370	3.26970427244235	0.0269601404816475	2H	348551922	348554551	-	MD-2-related lipid-recognition domain-containing protein
HORVU.MOREX.r3.2HG0117400	3.55437680166643	0.027034274135363	2H	58521381	58530711	-	Sec16 Sec23-binding domain-containing protein
HORVU.MOREX.r3.4HG0393350	2.53340989313413	0.027034274135363	4H	512419498	512421838	-	Purple acid phosphatase (EC 3.1.3.2)
HORVU.MOREX.r3.6HG0634060	3.55075263332265	0.0270351962814423	6H	561454429	561458238	-	1,3-beta-glucan synthase component FKS1-like domain-containing protein
HORVU.MOREX.r3.2HG0162580	3.54877849536867	0.0271048429487482	2H	432064030	432069604	-	Predicted protein
HORVU.MOREX.r3.2HG0196520	3.55335558212115	0.0271048429487482	2H	616153224	616153977	-	Predicted protein
HORVU.MOREX.r3.7HG0714850	3.60030307505884	0.0271048429487482	7H	496072742	496081516	-	3-hydroxyisobutyryl-CoA hydrolase (HIB-CoA hydrolase) (HIBYL-CoA-H) (EC 3.1.2.4) (3-hydroxyisobutyryl-coenzyme A hydrolase)
HORVU.MOREX.r3.7HG0701140	3.54711724063614	0.0271083665479517	7H	394290380	394295555	-	tyrosine--tRNA ligase (EC 6.1.1.1) (Tyrosyl-tRNA synthetase)
HORVU.MOREX.r3.3HG0319530	3.56076920540414	0.027169493320173	3H	594995223	594996716	-	Uncharacterized protein
HORVU.MOREX.r3.1HG0022780	2.16628285423321	0.0273290608775508	1H	85909275	85911562	-	Predicted protein
HORVU.MOREX.r3.6HG0617010	3.59845890521011	0.0273449073206233	6H	514938520	514939792	+	Predicted protein
HORVU.MOREX.r3.1HG0075070	3.56694283882326	0.0273758455925078	1H	471013413	471016008	+	LRAT domain-containing protein
HORVU.MOREX.r3.5HG0530270	3.54177394562915	0.0273913488041817	5H	571934735	571937199	+	Uncharacterized protein
HORVU.MOREX.r3.1HG0091010	3.54989084141101	0.0274675724971243	1H	506443458	506447479	-	Proteasome subunit beta
HORVU.MOREX.r3.3HG0279260	3.54989084141101	0.0274675724971243	3H	424221757	424225322	+	Predicted protein
HORVU.MOREX.r3.5HG0479110	3.53872808518865	0.0274698221545698	5H	424215539	424220708	-	TPR repeat-containing thioredoxin TDX (Tetratricoredoxin)
HORVU.MOREX.r3.2HG0201150	3.53721999411623	0.0276032015836237	2H	625706831	625712483	-	DUF4005 domain-containing protein
HORVU.MOREX.r3.1HG0060690	3.5449070863195	0.027635064598793	1H	403610930	403611754	-	Predicted protein
HORVU.MOREX.r3.1HG0093030	3.53525626864101	0.0276514725591078	1H	510264140	510269456	-	Predicted protein
HORVU.MOREX.r3.3HG0282140	3.53416290369986	0.0276514725591078	3H	446981885	446984060	-	Uncharacterized protein
HORVU.MOREX.r3.6HG0555230	3.53416290369986	0.0276514725591078	6H	43124956	43126799	+	Uncharacterized protein
HORVU.MOREX.r3.3HG0310680	3.56039740917231	0.0276717781097711	3H	574503974	574508982	+	Mitochondrial import receptor subunit TOM20
HORVU.MOREX.r3.2HG0104520	3.53227302528755	0.0276718671424022	2H	17967307	17979879	+	Chloroplast acetyl-CoA carboxylase
HORVU.MOREX.r3.2HG0198720	2.52685186340892	0.0276718671424022	2H	621103653	621110422	-	methylmalonate-semialdehyde dehydrogenase (CoA acylating) (EC 1.2.1.27)
HORVU.MOREX.r3.3HG0227860	3.53227302528755	0.0276718671424022	3H	18381485	18387672	-	Predicted protein
HORVU.MOREX.r3.1HG0055270	3.5533587797811	0.0277550898881734	1H	368936331	368938308	+	Uncharacterized protein
HORVU.MOREX.r3.1HG0074650	3.5299868997268	0.0278576761383951	1H	468953836	468956677	-	Predicted protein
HORVU.MOREX.r3.1HG0089440	3.5335214391424	0.0278576761383951	1H	503321781	503322538	-	Predicted protein
HORVU.MOREX.r3.1HG0087270	3.55359723665418	0.0278608363622536	1H	499132588	499133605	-	Predicted protein
HORVU.MOREX.r3.2HG0099170	3.52643095137755	0.0279264401456165	2H	9417993	9419568	-	NADH:flavin oxidoreductase/NADH oxidase N-terminal domain-containing protein
HORVU.MOREX.r3.2HG0207660	3.53243580439713	0.0279357328332147	2H	641915791	641921014	-	Diacylglycerol kinase (EC 2.7.1.107)
HORVU.MOREX.r3.4HG0407950	3.53243580439713	0.0279357328332147	4H	580899655	580900317	-	Predicted protein
HORVU.MOREX.r3.3HG0303900	3.53128175016373	0.0280588791085357	3H	554611284	554616720	+	Uncharacterized protein
HORVU.MOREX.r3.5HG0500210	3.24999551813138	0.0280588791085357	5H	504051107	504055913	+	Proteasome subunit alpha type
HORVU.MOREX.r3.6HG0588770	-1.86974799737274	0.0280588791085357	6H	308713663	308713864	+	Uncharacterized protein
HORVU.MOREX.r3.1HG0089390	3.52159291741986	0.0280902746000784	1H	503240293	503248768	+	Predicted protein
HORVU.MOREX.r3.3HG0299760	3.53134657795095	0.0280902746000784	3H	538262893	538263694	+	BolA-like protein
HORVU.MOREX.r3.3HG0320840	3.52048320939599	0.0280902746000784	3H	597911570	597917173	+	Signal peptide peptidase
HORVU.MOREX.r3.4HG0391150	3.5221059497258	0.0280902746000784	4H	496133809	496143096	+	CTLH domain-containing protein
HORVU.MOREX.r3.5HG0495990	3.5221059497258	0.0280902746000784	5H	491906762	491909114	-	Proteasome subunit beta
HORVU.MOREX.r3.7HG0682620	3.52048320939599	0.0280902746000784	7H	193757277	193760457	+	Predicted protein
HORVU.MOREX.r3.1HG0094710	3.51924124033487	0.0281208200608357	1H	514445939	514452741	-	Eukaryotic translation initiation factor 5B (EC 3.6.5.3) (Translation initiation factor IF-2)
HORVU.MOREX.r3.3HG0278630	3.53205812251694	0.0281756769311322	3H	420036222	420037798	-	Ras-related protein RABA1f
HORVU.MOREX.r3.3HG0255020	3.59072265524249	0.0282054240457328	3H	184621309	184623220	+	Peroxidase (EC 1.11.1.7)
HORVU.MOREX.r3.6HG0566420	3.5197725813371	0.0283781484857913	6H	101442394	101443645	-	glutathione transferase (EC 2.5.1.18)
HORVU.MOREX.r3.5HG0534480	3.51388032338652	0.0284077281160739	5H	579989052	579992890	-	NAD-dependent epimerase/dehydratase domain-containing protein
HORVU.MOREX.r3.2HG0169000	3.5253914815876	0.0285782603849365	2H	480306386	480307265	-	Uncharacterized protein
HORVU.MOREX.r3.5HG0504160	3.23879834860101	0.0285782603849365	5H	512389116	512389677	-	Histone H4
HORVU.MOREX.r3.3HG0309300	3.53518237086721	0.0285849449095377	3H	569903762	569904442	+	Predicted protein
HORVU.MOREX.r3.5HG0443080	3.53064887835015	0.0285872874507671	5H	100907666	100913175	+	Prefoldin subunit 3
HORVU.MOREX.r3.1HG0053960	3.52570212024063	0.028642699840749	1H	360670794	360673549	+	Urea-proton symporter DUR3 (High-affinity urea active transporter DUR3)
HORVU.MOREX.r3.2HG0156720	3.50885794877687	0.028642699840749	2H	380344136	380348246	-	Protein DETOXIFICATION (Multidrug and toxic compound extrusion protein)
HORVU.MOREX.r3.3HG0258280	3.5072374390227	0.028642699840749	3H	216718478	216724580	+	Coatomer subunit beta (Beta-coat protein)
HORVU.MOREX.r3.3HG0303690	3.50665882639294	0.028642699840749	3H	553492024	553495412	+	Predicted protein
HORVU.MOREX.r3.7HG0715010	3.50778541049316	0.028642699840749	7H	497434418	497439142	+	Predicted protein
HORVU.MOREX.r3.7HG0737470	3.50885794877687	0.028642699840749	7H	597694124	597695734	-	Peroxidase (EC 1.11.1.7)
HORVU.MOREX.r3.5HG0505150	3.52908829912725	0.0287258284277282	5H	514713108	514714962	+	Predicted protein
HORVU.MOREX.r3.3HG0320000	3.51978238828156	0.0288009062518509	3H	596369167	596369434	+	Secreted protein
HORVU.MOREX.r3.4HG0366020	3.5010918852055	0.0290317918941163	4H	248156226	248198959	+	Xaa-Pro aminopeptidase (EC 3.4.11.9)
HORVU.MOREX.r3.6HG0580890	3.50160238767006	0.029033493876428	6H	215647014	215658966	+	Predicted protein
HORVU.MOREX.r3.2HG0186560	3.51354071612538	0.0290788065948255	2H	582772350	582775999	-	Rho-GAP domain-containing protein
HORVU.MOREX.r3.2HG0192880	3.54447257625712	0.0291146789159189	2H	606210120	606229908	-	Uncharacterized protein
HORVU.MOREX.r3.1HG0045890	3.50861867084939	0.0291180268988864	1H	300591975	300598214	+	Predicted protein
HORVU.MOREX.r3.2HG0206500	3.21718930243672	0.0291180268988864	2H	639445438	639452735	+	Fibronectin type III-like domain-containing protein
HORVU.MOREX.r3.4HG0348040	3.49658086298403	0.0291399099431346	4H	81440593	81441142	+	Dirigent protein
HORVU.MOREX.r3.4HG0388220	3.51678744137344	0.0291819535769184	4H	474038113	474041003	+	ENTH domain-containing protein
HORVU.MOREX.r3.6HG0574620	3.49575543514722	0.0291921094214644	6H	160385585	160386185	+	Predicted protein
HORVU.MOREX.r3.2HG0200390	3.49487133300238	0.0292735617603626	2H	623901698	623914622	+	Beta-fructofuranosidase
HORVU.MOREX.r3.4HG0338790	3.49268659691423	0.0292735617603626	4H	23524692	23530815	-	Predicted protein
HORVU.MOREX.r3.2HG0205980	3.49140184996577	0.02929882836351	2H	638378093	638381728	+	Predicted protein
HORVU.MOREX.r3.3HG0218520	3.49830901250417	0.02929882836351	3H	1609631	1611738	+	Predicted protein
HORVU.MOREX.r3.4HG0340040	3.51969676035466	0.029351337369217	4H	28484652	28485217	-	Predicted protein
HORVU.MOREX.r3.6HG0579370	3.20935302874611	0.0294764044501586	6H	196640321	196648376	-	Aminopeptidase (EC 3.4.11.-)
HORVU.MOREX.r3.4HG0387550	3.50900602028358	0.0296102458439396	4H	470380623	470381652	+	NAD(P)H dehydrogenase (quinone) (EC 1.6.5.2)
HORVU.MOREX.r3.6HG0628410	3.49588295323605	0.0296102458439396	6H	549900021	549901047	+	Germin-like protein
HORVU.MOREX.r3.7HG0636530	-1.50803404588088	0.0296102458439396	7H	4416011	4418599	+	Predicted protein
HORVU.MOREX.r3.7HG0738340	3.48468719963403	0.0296127718700086	7H	599608662	599611154	+	Haloacid dehalogenase-like hydrolase domain-containing protein 3
HORVU.MOREX.r3.6HG0548700	3.4839980447384	0.0296420994682043	6H	22348634	22349864	+	ribose-5-phosphate isomerase (EC 5.3.1.6)
HORVU.MOREX.r3.1HG0081000	3.49067448856328	0.0296566122880871	1H	487489614	487496570	+	Aldehyde dehydrogenase domain-containing protein
HORVU.MOREX.r3.7HG0726170	3.49067448856328	0.0296566122880871	7H	560669403	560674396	-	mitogen-activated protein kinase (EC 2.7.11.24)
HORVU.MOREX.r3.4HG0406630	3.48635973593684	0.0296767208333767	4H	575378804	575379499	-	Predicted protein
HORVU.MOREX.r3.5HG0441730	3.52025126880569	0.0296792634582438	5H	90184569	90190019	+	Uncharacterized protein
HORVU.MOREX.r3.7HG0683940	-3.55491427601445	0.0297013354376421	7H	204162974	204167627	+	65-kDa microtubule-associated protein 8
HORVU.MOREX.r3.4HG0397450	3.52737111866995	0.0297494617402645	4H	538068279	538072715	-	T-complex protein 1 subunit beta (CCT-beta)
HORVU.MOREX.r3.7HG0691530	-1.82060044288344	0.0297494617402645	7H	276231355	276292029	+	Exocyst complex component Sec8
HORVU.MOREX.r3.1HG0055830	3.49317256088584	0.0298196455869503	1H	372302906	372307939	+	Branched-chain-amino-acid aminotransferase (EC 2.6.1.42)
HORVU.MOREX.r3.6HG0615210	3.47856325532668	0.0298196455869503	6H	505529568	505534625	-	Uncharacterized protein
HORVU.MOREX.r3.3HG0302910	3.49830884574898	0.0298494729034605	3H	551121925	551122655	+	Histone H2B
HORVU.MOREX.r3.1HG0046460	3.47976553503834	0.0298720504472363	1H	306011731	306013183	+	Predicted protein
HORVU.MOREX.r3.5HG0420010	3.55599118716728	0.0298720504472363	5H	2011827	2015440	-	Sucrose-phosphatase (EC 3.1.3.24)
HORVU.MOREX.r3.5HG0492970	3.48170730699373	0.0298720504472363	5H	484801617	484802636	+	DOMON domain-containing protein
HORVU.MOREX.r3.2HG0196250	3.47576999877398	0.0299148558711158	2H	615302291	615303343	-	RING-type E3 ubiquitin transferase (EC 2.3.2.27)
HORVU.MOREX.r3.2HG0112600	3.47872991855431	0.0299722422751804	2H	41448576	41450172	+	Peroxidase (EC 1.11.1.7)
HORVU.MOREX.r3.3HG0289010	3.48678233856319	0.0300276167534394	3H	487364464	487367263	-	Predicted protein
HORVU.MOREX.r3.3HG0228240	3.49880794578678	0.0300662291075421	3H	19140993	19144686	-	Predicted protein
HORVU.MOREX.r3.5HG0484690	3.47112920593534	0.0301066821666197	5H	450254261	450255085	+	Predicted protein
HORVU.MOREX.r3.1HG0075990	3.47047032593771	0.0301223155146572	1H	473711155	473712871	+	Soluble inorganic pyrophosphatase (EC 3.6.1.1) (Pyrophosphate phospho-hydrolase)
HORVU.MOREX.r3.6HG0570850	3.49019206685587	0.0301367501145921	6H	130013124	130016133	+	non-specific serine/threonine protein kinase (EC 2.7.11.1)
HORVU.MOREX.r3.1HG0004280	3.46987908981349	0.0304405425954167	1H	9112594	9116319	+	Chymotrypsin inhibitor-2
HORVU.MOREX.r3.1HG0018050	3.47603265051326	0.0304405425954167	1H	57851573	57859891	+	Uncharacterized protein
HORVU.MOREX.r3.1HG0031210	3.46600887207077	0.0304405425954167	1H	153199220	153200440	+	Late embryogenesis abundant protein LEA-2 subgroup domain-containing protein
HORVU.MOREX.r3.1HG0071630	3.46747399180001	0.0304405425954167	1H	455700261	455701383	-	PRA1 family protein
HORVU.MOREX.r3.2HG0101860	3.46652342159687	0.0304405425954167	2H	13978388	13979146	+	Uncharacterized protein
HORVU.MOREX.r3.3HG0219290	3.46701072850755	0.0304405425954167	3H	2395701	2398027	+	WAT1-related protein
HORVU.MOREX.r3.4HG0334820	3.46544989578271	0.0304405425954167	4H	9731903	9736003	+	Predicted protein
HORVU.MOREX.r3.5HG0420680	3.46747399180001	0.0304405425954167	5H	3634652	3636580	+	E3 ubiquitin-protein ligase RMA (EC 2.3.2.27) (Protein RING membrane-anchor) (RING-type E3 ubiquitin transferase RMA)
HORVU.MOREX.r3.5HG0444960	3.48383986832734	0.0304405425954167	5H	117164794	117168425	-	Uncharacterized protein
HORVU.MOREX.r3.5HG0447980	3.46643680950727	0.0304405425954167	5H	144212144	144217741	-	OBERON-like protein
HORVU.MOREX.r3.7HG0716900	3.46747399180001	0.0304405425954167	7H	505744510	505749111	+	Transmembrane 9 superfamily member
HORVU.MOREX.r3.2HG0106140	3.51478784161254	0.0304461985192312	2H	22903896	22905941	+	plant cystathionine gamma-synthase (EC 2.5.1.160)
HORVU.MOREX.r3.7HG0747440	3.18544613407805	0.0304461985192312	7H	619370745	619372391	-	O-methyltransferase ZRP4
HORVU.MOREX.r3.4HG0413800	3.18510055636608	0.0304634871082217	4H	597882364	597885286	-	RHOMBOID-like protein (EC 3.4.21.105)
HORVU.MOREX.r3.4HG0380240	3.1855863928349	0.0304771522285139	4H	410265686	410273727	-	Predicted protein
HORVU.MOREX.r3.2HG0213430	3.46439239199235	0.0304911532380356	2H	654181744	654183187	+	Predicted protein
HORVU.MOREX.r3.7HG0721660	3.47247679766723	0.0305631163657002	7H	538117776	538121361	-	Uncharacterized protein
HORVU.MOREX.r3.5HG0432260	3.45970290617616	0.030571694001731	5H	36463384	36466301	+	Predicted protein
HORVU.MOREX.r3.5HG0468390	3.45855481961983	0.0305920689648981	5H	351832537	351838219	-	CUE domain-containing protein
HORVU.MOREX.r3.3HG0267280	3.456096629101	0.0306101602078603	3H	326397844	326406246	+	Protein ROOT HAIR DEFECTIVE 3 homolog (EC 3.6.5.-) (Protein SEY1 homolog)
HORVU.MOREX.r3.5HG0472700	3.456096629101	0.0306101602078603	5H	385087700	385095081	-	Predicted protein
HORVU.MOREX.r3.3HG0266000	3.45538151690808	0.0306449795737174	3H	308906038	308911862	-	Predicted protein
HORVU.MOREX.r3.1HG0071210	3.46597717792413	0.0307632272552668	1H	454554556	454556998	-	RING-type E3 ubiquitin transferase (EC 2.3.2.27)
HORVU.MOREX.r3.3HG0319800	3.46597717792413	0.0307632272552668	3H	595758158	595760387	+	Dehydration responsive protein 4 (Predicted protein)
HORVU.MOREX.r3.7HG0655990	3.45379918040887	0.0307632272552668	7H	48515245	48516519	+	Predicted protein
HORVU.MOREX.r3.2HG0159700	3.46173404700097	0.0309317380803759	2H	410935931	410951580	+	Importin N-terminal domain-containing protein
HORVU.MOREX.r3.3HG0312050	3.44984960256739	0.0309317380803759	3H	579594305	579597249	-	Exostosin GT47 domain-containing protein
HORVU.MOREX.r3.4HG0357360	3.45212199393991	0.0309326339671678	4H	154886839	154893669	+	aldehyde oxygenase (deformylating) (EC 4.1.99.5)
HORVU.MOREX.r3.5HG0517790	3.47002869414374	0.0309361743159774	5H	544694256	544698740	-	YTH domain-containing family protein
HORVU.MOREX.r3.5HG0469690	3.45943288406418	0.0310397007386728	5H	361771266	361773872	-	Trafficking protein particle complex subunit
HORVU.MOREX.r3.4HG0388470	3.45394593183167	0.0311516260683597	4H	477779625	477780526	+	Predicted protein
HORVU.MOREX.r3.5HG0518560	3.44989373975122	0.0311516260683597	5H	546082703	546084221	-	Cell wall hydroxyproline-rich glycoprotein
HORVU.MOREX.r3.7HG0649540	3.44349176808825	0.0312763735259581	7H	28277293	28278116	+	Early nodulin
HORVU.MOREX.r3.5HG0528020	3.44874140207942	0.0312995753670009	5H	567102919	567103785	-	Uncharacterized protein
HORVU.MOREX.r3.3HG0289910	3.4415625209602	0.031308115323902	3H	493360173	493366811	+	AAA+ ATPase domain-containing protein
HORVU.MOREX.r3.3HG0226800	3.4408337107002	0.0313227494099227	3H	15770595	15773557	-	PB1 domain-containing protein
HORVU.MOREX.r3.3HG0311810	3.4408337107002	0.0313227494099227	3H	578667542	578673035	-	E2 ubiquitin-conjugating enzyme (EC 2.3.2.23)
HORVU.MOREX.r3.1HG0003090	3.47540159048079	0.0313554287953918	1H	5944994	5974567	+	Acidic protein
HORVU.MOREX.r3.2HG0149820	3.47825938503559	0.0314179961607149	2H	317754746	317758414	-	Small nuclear ribonucleoprotein-associated protein
HORVU.MOREX.r3.6HG0542730	3.43832398852786	0.031548433896399	6H	11112388	11116069	-	MalT-like TPR region domain-containing protein
HORVU.MOREX.r3.4HG0395240	3.43703118000016	0.0316284315176562	4H	525429230	525435291	-	Two-component response regulator
HORVU.MOREX.r3.5HG0441660	3.45565544508167	0.0316690761327202	5H	89429879	89431658	+	Mitochondrial import inner membrane translocase subunit
HORVU.MOREX.r3.4HG0357750	3.43898208809024	0.031766518671076	4H	156889667	156906779	-	Alanine--tRNA ligase (EC 6.1.1.7) (Alanyl-tRNA synthetase) (AlaRS)
HORVU.MOREX.r3.4HG0418930	3.53342498422541	0.031766518671076	4H	609890011	609890832	+	Germin-like protein
HORVU.MOREX.r3.5HG0436900	3.43229667743099	0.031766518671076	5H	56260605	56265075	-	Predicted protein
HORVU.MOREX.r3.6HG0633530	3.44482980255525	0.031766518671076	6H	560079257	560084242	+	RNA helicase (EC 3.6.4.13)
HORVU.MOREX.r3.2HG0185230	3.45332233423745	0.0318579848916588	2H	573550112	573553051	+	EndoU domain-containing protein
HORVU.MOREX.r3.1HG0024710	3.42821318862372	0.0319206972059309	1H	99418113	99421485	+	Golgi apparatus membrane protein TVP23
HORVU.MOREX.r3.1HG0024740	3.43048577354253	0.0319206972059309	1H	99429069	99435001	-	Predicted protein
HORVU.MOREX.r3.3HG0307240	3.42882780057765	0.0319206972059309	3H	564284580	564286688	+	Predicted protein
HORVU.MOREX.r3.6HG0621200	-2.54288823442409	0.0319206972059309	6H	529914708	529915667	+	Predicted protein
HORVU.MOREX.r3.7HG0662160	3.42995521413181	0.0319206972059309	7H	68946523	68949892	-	phosphopantothenoylcysteine decarboxylase (EC 4.1.1.36)
HORVU.MOREX.r3.5HG0512410	3.44017075908875	0.0319332083502494	5H	531213604	531215633	+	Predicted protein
HORVU.MOREX.r3.7HG0726790	3.44017075908875	0.0319332083502494	7H	564136422	564138220	+	Dolichyl-diphosphooligosaccharide--protein glycosyltransferase 48 kDa subunit (Oligosaccharyl transferase 48 kDa subunit)
HORVU.MOREX.r3.3HG0245070	3.44051524430991	0.0320665016391869	3H	102545704	102549664	+	Predicted protein
HORVU.MOREX.r3.1HG0076600	3.42840175110296	0.032100814016179	1H	475522449	475528581	+	ABC transporter domain-containing protein
HORVU.MOREX.r3.2HG0140980	3.42048938036127	0.0322502862625521	2H	212759647	212764040	+	RRM domain-containing protein
HORVU.MOREX.r3.3HG0278710	3.43146771850511	0.0322502862625521	3H	421183800	421184874	-	FAS1 domain-containing protein
HORVU.MOREX.r3.3HG0317780	3.42172991876989	0.0322502862625521	3H	591546159	591547891	-	Fe2OG dioxygenase domain-containing protein
HORVU.MOREX.r3.5HG0489070	3.42112828401791	0.0322502862625521	5H	473005960	473006882	+	Predicted protein
HORVU.MOREX.r3.7HG0667540	3.44987623130234	0.0322612687452848	7H	99684904	99691155	-	LIM zinc-binding domain-containing protein
HORVU.MOREX.r3.1HG0024880	3.43005846699357	0.0324229235016346	1H	100190547	100194301	-	Dihydrolipoyl dehydrogenase (EC 1.8.1.4)
HORVU.MOREX.r3.5HG0458100	3.42427296909298	0.0324229235016346	5H	267326038	267327253	+	Late embryogenesis abundant protein LEA-2 subgroup domain-containing protein
HORVU.MOREX.r3.5HG0491040	3.41747574272896	0.0324229235016346	5H	479415995	479419954	+	Predicted protein
HORVU.MOREX.r3.5HG0487040	3.42039778166467	0.0325123373946274	5H	462689001	462689973	-	Alpha/beta hydrolase fold-3 domain-containing protein
HORVU.MOREX.r3.7HG0718930	3.41658353247782	0.0325123373946274	7H	521209380	521210922	+	Peroxidase (EC 1.11.1.7)
HORVU.MOREX.r3.3HG0318560	3.43365265934145	0.0325419898289709	3H	592818990	592820493	+	Uncharacterized protein
HORVU.MOREX.r3.4HG0340230	3.41458608073482	0.0325419898289709	4H	29366803	29370614	-	Predicted protein
HORVU.MOREX.r3.4HG0380820	3.41458608073482	0.0325419898289709	4H	415136010	415140032	+	Uncharacterized protein
HORVU.MOREX.r3.7HG0730810	3.42509733626212	0.0325419898289709	7H	578971959	578972581	-	Histone H4
HORVU.MOREX.r3.2HG0153490	3.42857656844037	0.0325475779058724	2H	356990578	356992908	-	N-acetyl-D-glucosamine kinase (EC 2.7.1.59) (GlcNAc kinase)
HORVU.MOREX.r3.2HG0161410	-1.84744737629981	0.0325542295848476	2H	425614893	425618180	-	Acyl-[acyl-carrier-protein] desaturase (EC 1.14.19.-)
HORVU.MOREX.r3.5HG0524290	3.41199806506887	0.0325542295848476	5H	558787743	558791094	+	Uncharacterized protein
HORVU.MOREX.r3.2HG0217960	3.46566126189326	0.0326975738901516	2H	665022068	665023334	+	Peroxidase 1 (EC 1.11.1.7)
HORVU.MOREX.r3.2HG0113410	3.4218692348182	0.0328331255449455	2H	43855277	43859482	-	Predicted protein
HORVU.MOREX.r3.3HG0263100	3.40862399577431	0.0328331255449455	3H	273401192	273453728	+	shikimate dehydrogenase (NADP(+)) (EC 1.1.1.25)
HORVU.MOREX.r3.7HG0711230	3.42613453828589	0.0328331255449455	7H	470595371	470600784	+	Auxin-responsive protein
HORVU.MOREX.r3.7HG0744200	3.1371998224095	0.0328331255449455	7H	613060145	613064327	+	Uncharacterized protein
HORVU.MOREX.r3.7HG0687430	3.4123186504507	0.0328706768127786	7H	235807882	235812155	+	Predicted protein
HORVU.MOREX.r3.3HG0278670	3.40762102788394	0.0328880325908013	3H	420605655	420606546	-	Predicted protein
HORVU.MOREX.r3.5HG0482430	3.40486450635128	0.0328880325908013	5H	440911780	440913073	+	Predicted protein
HORVU.MOREX.r3.7HG0706600	-3.33042454944517	0.0328880325908013	7H	439164777	439165780	+	Pectinesterase inhibitor domain-containing protein
HORVU.MOREX.r3.2HG0176680	3.40333254397572	0.0329841632659762	2H	533991783	533995513	-	Serine/threonine protein phosphatase 2A regulatory subunit
HORVU.MOREX.r3.7HG0706310	3.13444712166363	0.032991083860704	7H	436901605	436904439	-	Enoyl reductase (ER) domain-containing protein
HORVU.MOREX.r3.2HG0190290	3.40939630523784	0.0330029759785518	2H	598159940	598169153	+	non-specific serine/threonine protein kinase (EC 2.7.11.1)
HORVU.MOREX.r3.4HG0410390	3.13408145945071	0.0330988810045933	4H	588875808	588882160	+	NADH dehydrogenase [ubiquinone] 1 beta subcomplex subunit 7
HORVU.MOREX.r3.6HG0557750	3.40157184245562	0.0331121862377771	6H	54572070	54575353	+	AP complex subunit sigma
HORVU.MOREX.r3.4HG0344110	3.39618679232212	0.0333525603150986	4H	50707513	50717354	+	PHD finger protein ALFIN-LIKE
HORVU.MOREX.r3.5HG0487800	3.39954266719355	0.0333525603150986	5H	467448499	467454549	+	Glucose-6-phosphate isomerase (EC 5.3.1.9)
HORVU.MOREX.r3.7HG0714620	3.39954266719355	0.0333525603150986	7H	494046028	494047754	-	Predicted protein
HORVU.MOREX.r3.4HG0400760	3.39841558106941	0.0335205259488614	4H	553141179	553144822	-	Uncharacterized protein
HORVU.MOREX.r3.2HG0193640	3.41126952547488	0.0335751729246638	2H	607668186	607672468	+	Predicted protein
HORVU.MOREX.r3.2HG0194700	3.39045200632799	0.0335751729246638	2H	610884509	610887767	-	Aminomethyltransferase (EC 2.1.2.10) (Glycine cleavage system T protein)
HORVU.MOREX.r3.4HG0405600	3.44029486896055	0.0335751729246638	4H	571393729	571397224	-	Eukaryotic translation initiation factor 3 subunit K (eIF3k) (eIF-3 p25)
HORVU.MOREX.r3.4HG0418910	3.4695305288121	0.0335751729246638	4H	609878587	609879408	+	Germin-like protein
HORVU.MOREX.r3.7HG0691910	3.39351415239923	0.0335751729246638	7H	282806081	282830512	+	Predicted protein
HORVU.MOREX.r3.7HG0710400	3.39045200632799	0.0335751729246638	7H	463526614	463528800	-	Predicted protein
HORVU.MOREX.r3.7HG0736150	3.39721195344559	0.0335751729246638	7H	594995106	594997133	-	CRAL-TRIO domain-containing protein
HORVU.MOREX.r3.3HG0251620	3.39248877019953	0.0336281828286889	3H	156022000	156025250	-	Negatively light-regulated protein
HORVU.MOREX.r3.2HG0157650	3.39138738369035	0.0337644508248524	2H	387205718	387208719	+	Predicted protein
HORVU.MOREX.r3.2HG0215540	3.39138738369035	0.0337644508248524	2H	658608454	658609718	-	Peroxidase (EC 1.11.1.7)
HORVU.MOREX.r3.1HG0033920	2.41247332010749	0.0338137599547791	1H	181159538	181165381	+	ATP synthase subunit gamma, mitochondrial (F-ATPase gamma subunit)
HORVU.MOREX.r3.2HG0107100	3.38317240437293	0.0339641173945589	2H	24799120	24803242	-	MPN domain-containing protein
HORVU.MOREX.r3.4HG0384040	3.38500127470579	0.0339641173945589	4H	444866311	444869921	-	S1 motif domain-containing protein
HORVU.MOREX.r3.4HG0384560	3.41824688687258	0.0339641173945589	4H	449596173	449599222	+	pyruvate decarboxylase (EC 4.1.1.1)
HORVU.MOREX.r3.4HG0410200	3.38500127470579	0.0339641173945589	4H	588481907	588484501	-	adenylate kinase (EC 2.7.4.3)
HORVU.MOREX.r3.5HG0464630	3.45707981361582	0.0339683503946584	5H	324752046	324754338	-	Peroxidase (EC 1.11.1.7)
HORVU.MOREX.r3.6HG0632380	3.38095656766144	0.0340641264943758	6H	558084200	558089645	+	PSP proline-rich domain-containing protein
HORVU.MOREX.r3.2HG0116060	3.40419669473914	0.0340664530136153	2H	53112167	53114993	+	Predicted protein
HORVU.MOREX.r3.1HG0087810	3.40683866145708	0.0342365372510891	1H	500044018	500045560	+	Uncharacterized protein
HORVU.MOREX.r3.1HG0013050	3.39159629619496	0.0343005270307717	1H	32373710	32376691	+	Ribosome biogenesis regulatory protein
HORVU.MOREX.r3.1HG0017280	3.38192548842947	0.0343005270307717	1H	53991853	53995794	+	Peroxidase (EC 1.11.1.7)
HORVU.MOREX.r3.1HG0091390	3.3770715297254	0.0343005270307717	1H	506828686	506829542	-	EF-hand domain-containing protein
HORVU.MOREX.r3.2HG0204170	2.04046411402696	0.0343005270307717	2H	633396390	633399338	-	D-3-phosphoglycerate dehydrogenase (EC 1.1.1.95)
HORVU.MOREX.r3.2HG0214830	3.3861919832823	0.0343005270307717	2H	657303150	657304664	-	Predicted protein
HORVU.MOREX.r3.4HG0339980	3.37584340891448	0.0343005270307717	4H	28404701	28405218	+	Uncharacterized protein
HORVU.MOREX.r3.5HG0467780	3.37444943819372	0.0343005270307717	5H	346833545	346834400	-	Uncharacterized protein
HORVU.MOREX.r3.5HG0511450	3.37822542872516	0.0343005270307717	5H	528901687	528908001	+	Putative ABC transporter
HORVU.MOREX.r3.5HG0517140	3.3861919832823	0.0343005270307717	5H	542954092	542957903	+	non-specific serine/threonine protein kinase (EC 2.7.11.1)
HORVU.MOREX.r3.5HG0526050	3.37367934859884	0.0343005270307717	5H	562762658	562763539	+	Predicted protein
HORVU.MOREX.r3.6HG0613230	3.37367934859884	0.0343005270307717	6H	495065155	495068931	-	Pollen-specific protein C13
HORVU.MOREX.r3.7HG0700790	3.37865663268192	0.0343196084212551	7H	391453310	391455895	+	Predicted protein
HORVU.MOREX.r3.4HG0370350	3.1123170630069	0.0343658353952471	4H	301232490	301244777	-	Pre-mRNA-processing factor 17
HORVU.MOREX.r3.5HG0518980	3.36780564785999	0.0346935270344671	5H	547257450	547260940	-	BI1-like protein
HORVU.MOREX.r3.3HG0286300	3.09883470168696	0.034715016640652	3H	470630393	470631248	-	Predicted protein
HORVU.MOREX.r3.4HG0339820	3.37021355128233	0.034715016640652	4H	27763045	27764820	-	Major facilitator superfamily (MFS) profile domain-containing protein
HORVU.MOREX.r3.7HG0721830	3.12775659181879	0.034715016640652	7H	539138458	539139675	-	Germin-like protein
HORVU.MOREX.r3.6HG0618080	3.36889294327268	0.034811401940889	6H	518719553	518720220	+	Predicted protein
HORVU.MOREX.r3.1HG0081340	3.09954972024185	0.0349289226589542	1H	488342709	488343441	+	Uncharacterized protein
HORVU.MOREX.r3.2HG0192180	3.09867236419564	0.034989876453428	2H	604186822	604192868	+	26S proteasome non-ATPase regulatory subunit 1 homolog
HORVU.MOREX.r3.2HG0200030	3.39638785857075	0.035002574147439	2H	623231040	623231307	-	Wound-responsive family protein
HORVU.MOREX.r3.6HG0541400	3.10111139486215	0.035002574147439	6H	8181486	8186540	+	Predicted protein
HORVU.MOREX.r3.7HG0648880	3.36275338250518	0.0350325116442874	7H	27496950	27506731	-	Coatomer subunit beta'
HORVU.MOREX.r3.4HG0332900	3.36164058705546	0.0350538170467675	4H	4222813	4225018	+	Membrin
HORVU.MOREX.r3.1HG0055400	3.12108868312561	0.0350573199758025	1H	369709882	369713026	-	Predicted protein
HORVU.MOREX.r3.3HG0255600	3.37073811418066	0.0350573199758025	3H	190246551	190248875	-	Uncharacterized protein
HORVU.MOREX.r3.5HG0484750	3.36645476087359	0.0350573199758025	5H	450685468	450687942	+	Peptidyl-prolyl cis-trans isomerase (EC 5.2.1.8)
HORVU.MOREX.r3.5HG0534510	3.36168062320487	0.0350573199758025	5H	580046698	580048776	-	Nascent polypeptide-associated complex subunit beta
HORVU.MOREX.r3.6HG0624720	3.36168062320487	0.0350573199758025	6H	541165694	541173427	-	ABC transporter domain-containing protein
HORVU.MOREX.r3.7HG0680070	3.36220965793009	0.0350573199758025	7H	177124934	177128066	-	DSBA-like thioredoxin domain-containing protein
HORVU.MOREX.r3.1HG0035690	3.37455224804166	0.0352418107517173	1H	204749045	204781770	+	Ubiquitin carboxyl-terminal hydrolase (EC 3.4.19.12)
HORVU.MOREX.r3.4HG0337230	3.369207030392	0.035322024731821	4H	17738280	17745583	+	phosphoglucomutase (alpha-D-glucose-1,6-bisphosphate-dependent) (EC 5.4.2.2)
HORVU.MOREX.r3.2HG0159420	3.354147137014	0.0354140215527849	2H	408282999	408286731	+	Uncharacterized protein
HORVU.MOREX.r3.3HG0284000	3.354147137014	0.0354140215527849	3H	457448424	457451110	-	Uncharacterized protein
HORVU.MOREX.r3.3HG0327150	3.38179461506195	0.0354140215527849	3H	611984334	611987747	-	Uncharacterized protein
HORVU.MOREX.r3.6HG0596300	3.08588072262523	0.0356212355013487	6H	375935535	375939091	-	Predicted protein
HORVU.MOREX.r3.4HG0413910	3.34906485632813	0.0356479319496682	4H	598031658	598035480	-	Fructan 1-exohydrolase (EC 3.2.1.153)
HORVU.MOREX.r3.3HG0310690	3.41271525544603	0.0357321580999188	3H	574760880	574762638	-	Predicted protein
HORVU.MOREX.r3.6HG0610770	3.34811490914146	0.0357325819176595	6H	483109427	483112743	+	Transmembrane 9 superfamily member
HORVU.MOREX.r3.3HG0318620	3.37106731904418	0.0357893988201248	3H	592853279	592854810	-	Glucan endo-1,3-beta-glucosidase GII
HORVU.MOREX.r3.5HG0500570	3.08637070256934	0.0357893988201248	5H	504763025	504769728	-	Synaptotagmin
HORVU.MOREX.r3.1HG0017410	3.34714552786999	0.0357991324084089	1H	55233428	55234996	-	Peroxidase (EC 1.11.1.7)
HORVU.MOREX.r3.3HG0286500	3.34714552786999	0.0357991324084089	3H	471960066	471960606	-	Uncharacterized protein
HORVU.MOREX.r3.3HG0306610	3.34405362356746	0.0357991324084089	3H	562018368	562025374	-	Signal recognition particle subunit SRP72
HORVU.MOREX.r3.4HG0333380	3.36058855725181	0.0357991324084089	4H	5505710	5509184	+	Tubulin beta chain
HORVU.MOREX.r3.5HG0484170	3.34405362356746	0.0357991324084089	5H	446727786	446733313	+	Golgi SNAP receptor complex member 1
HORVU.MOREX.r3.6HG0612090	3.09278835185028	0.0357991324084089	6H	489845554	489849638	+	Peptidase A1 domain-containing protein
HORVU.MOREX.r3.7HG0641000	3.34330478942	0.0357991324084089	7H	11846260	11849717	+	Uncharacterized protein
HORVU.MOREX.r3.5HG0474780	3.35737125439084	0.0358433503890161	5H	398227390	398232029	-	Predicted protein
HORVU.MOREX.r3.5HG0495360	3.35509511587353	0.0358433503890161	5H	490664407	490738562	-	4-hydroxy-7-methoxy-3-oxo-3,4-dihydro-2H-1,4-benzoxazin-2-yl glucosidebeta-D-glucosidase
HORVU.MOREX.r3.1HG0060340	3.34813287204254	0.0358881369260896	1H	401944891	401945609	-	Histone H2B
HORVU.MOREX.r3.3HG0252240	3.34813287204254	0.0358881369260896	3H	162525559	162526240	-	Histone H2B
HORVU.MOREX.r3.1HG0021390	3.36921919791679	0.0359002342479283	1H	77921119	77922007	+	glutathione transferase (EC 2.5.1.18)
HORVU.MOREX.r3.2HG0176990	3.37415180363775	0.0359002342479283	2H	536293731	536296089	+	Protein kinase domain-containing protein
HORVU.MOREX.r3.6HG0625870	3.09595380443641	0.0359002342479283	6H	543341343	543344431	+	Uncharacterized protein
HORVU.MOREX.r3.1HG0079800	3.3580122634531	0.036099139560621	1H	485005586	485009450	+	Predicted protein
HORVU.MOREX.r3.3HG0228140	3.33844151555467	0.036099139560621	3H	18845124	18847544	-	Predicted protein
HORVU.MOREX.r3.3HG0299820	2.37981573377443	0.036099139560621	3H	538581285	538581956	-	Histone H3
HORVU.MOREX.r3.4HG0384370	3.33784042577676	0.036099139560621	4H	448212210	448216578	-	CHCH domain-containing protein
HORVU.MOREX.r3.7HG0681040	3.33578509233111	0.036099139560621	7H	184239007	184254504	-	J domain-containing protein
HORVU.MOREX.r3.3HG0315410	3.33500192852055	0.0361280563607263	3H	587699474	587704987	+	Uncharacterized protein
HORVU.MOREX.r3.2HG0111610	2.38735814899822	0.036161703546879	2H	37735771	37741646	-	Cellulose synthase (EC 2.4.1.12)
HORVU.MOREX.r3.3HG0235720	3.3341613766618	0.036161703546879	3H	39882175	39883210	-	NAD(P)H dehydrogenase (quinone) (EC 1.6.5.2)
HORVU.MOREX.r3.4HG0355150	3.3400319359628	0.036161703546879	4H	135655901	135656719	+	Predicted protein
HORVU.MOREX.r3.5HG0477800	3.34220919704252	0.036161703546879	5H	415022161	415024738	-	glucan endo-1,3-beta-D-glucosidase (EC 3.2.1.39)
HORVU.MOREX.r3.2HG0165490	3.34077741817373	0.0363477072964511	2H	455172394	455174031	+	Arogenate dehydratase (EC 4.2.1.91)
HORVU.MOREX.r3.2HG0178930	3.06821967658113	0.0363477072964511	2H	546694765	546699811	+	hydroxycinnamoyl-CoA:5-hydroxyanthranilate N-hydroxycinnamoyltransferase (EC 2.3.1.302)
HORVU.MOREX.r3.4HG0334890	3.35005180193569	0.0363477072964511	4H	9868663	9873821	+	Glycine-rich protein
HORVU.MOREX.r3.4HG0418870	3.38604122288064	0.0363477072964511	4H	609857661	609858482	+	Germin-like protein
HORVU.MOREX.r3.7HG0721840	3.0958982620442	0.0363477072964511	7H	539312881	539314095	-	Germin-like protein
HORVU.MOREX.r3.2HG0217920	3.3289253288445	0.0364025296159792	2H	664882251	664884688	-	Uncharacterized protein
HORVU.MOREX.r3.3HG0316960	3.32821163542461	0.0364100670298325	3H	590292509	590295836	+	Predicted protein
HORVU.MOREX.r3.1HG0067090	3.43036321653927	0.036435411238854	1H	437089473	437092541	+	Phospholipase A1 (EC 3.1.1.-)
HORVU.MOREX.r3.5HG0529500	3.32744739545082	0.036435411238854	5H	570442442	570447524	+	non-specific serine/threonine protein kinase (EC 2.7.11.1)
HORVU.MOREX.r3.7HG0747750	3.33494163941522	0.036435411238854	7H	620103486	620110720	+	Predicted protein
HORVU.MOREX.r3.6HG0627260	3.32662749833276	0.0364480082911793	6H	546369566	546374877	-	GATA-type domain-containing protein
HORVU.MOREX.r3.3HG0299740	3.37479316750727	0.0364510198975637	3H	538220414	538223803	-	Tubby-like F-box protein
HORVU.MOREX.r3.4HG0403460	3.33925811237132	0.0364662789106976	4H	564497544	564499960	-	Predicted protein
HORVU.MOREX.r3.2HG0172460	3.32479880918639	0.0365913482044724	2H	505534751	505536010	+	Alpha/beta hydrolase fold-3 domain-containing protein
HORVU.MOREX.r3.6HG0570630	3.32890933903449	0.0365913482044724	6H	128541823	128547526	-	Predicted protein
HORVU.MOREX.r3.1HG0070320	3.33765849801542	0.0366493714568429	1H	450160238	450163105	+	Predicted protein
HORVU.MOREX.r3.2HG0120220	3.05886773638244	0.0366493714568429	2H	70464732	70467370	-	Eukaryotic translation initiation factor 6 (eIF-6)
HORVU.MOREX.r3.2HG0205130	3.32377900752178	0.0366493714568429	2H	636273627	636277599	+	glycerol kinase (EC 2.7.1.30) (ATP:glycerol 3-phosphotransferase)
HORVU.MOREX.r3.4HG0339740	3.06372670567115	0.0366493714568429	4H	27099198	27102671	+	Peptidase C1A papain C-terminal domain-containing protein
HORVU.MOREX.r3.5HG0514990	3.32377900752178	0.0366493714568429	5H	538583913	538586868	+	Tubulin beta chain
HORVU.MOREX.r3.6HG0548640	3.40473448366624	0.0366493714568429	6H	22164093	22164393	-	Uncharacterized protein
HORVU.MOREX.r3.6HG0557070	3.32058397696109	0.0366493714568429	6H	51894056	51896274	-	Predicted protein
HORVU.MOREX.r3.7HG0644070	3.32761856716409	0.0366493714568429	7H	17591212	17594792	-	Uncharacterized protein 259I16.6
HORVU.MOREX.r3.1HG0067250	3.31903833310673	0.0366591174561171	1H	437719947	437728634	+	Secretory carrier-associated membrane protein (Secretory carrier membrane protein)
HORVU.MOREX.r3.4HG0383570	3.32311700891997	0.0366591174561171	4H	440371989	440374157	+	Predicted protein
HORVU.MOREX.r3.4HG0411700	3.31903833310673	0.0366591174561171	4H	592302988	592309703	-	Methyltransferase (EC 2.1.1.-)
HORVU.MOREX.r3.5HG0490680	3.32365311397666	0.0366591174561171	5H	477366551	477367254	-	NADH dehydrogenase [ubiquinone] 1 beta subcomplex subunit 11, mitochondrial
HORVU.MOREX.r3.7HG0687380	3.33204225367655	0.0366591174561171	7H	235155539	235156794	-	Alpha/beta hydrolase fold-3 domain-containing protein
HORVU.MOREX.r3.5HG0469420	3.31817918613998	0.0367126999643405	5H	359948607	359971862	+	Auxin transport protein BIG
HORVU.MOREX.r3.3HG0240970	3.3172551132725	0.0368030210223543	3H	74784119	74784988	+	Predicted protein
HORVU.MOREX.r3.5HG0529180	3.32462621203606	0.0368030210223543	5H	569221680	569224434	-	Predicted protein
HORVU.MOREX.r3.6HG0555700	3.31626054264788	0.036906664996799	6H	45406809	45410371	+	Predicted protein
HORVU.MOREX.r3.7HG0670490	3.32477589659905	0.0369914033858327	7H	114816062	114821651	+	Ubiquitin receptor RAD23 (DNA repair protein RAD23)
HORVU.MOREX.r3.2HG0204820	3.31421860290198	0.0370281592846168	2H	635725314	635726654	+	AP2/ERF domain-containing protein
HORVU.MOREX.r3.6HG0582560	3.31403938116866	0.0372109701701502	6H	232638692	232671220	+	B30.2/SPRY domain-containing protein
HORVU.MOREX.r3.1HG0007600	3.30965459456542	0.0372389791345936	1H	15528996	15534507	+	P-type Ca(2+) transporter (EC 7.2.2.10)
HORVU.MOREX.r3.2HG0203330	3.32322202759735	0.0372389791345936	2H	631342726	631349066	+	CRAL-TRIO domain-containing protein
HORVU.MOREX.r3.2HG0178420	3.3348282236543	0.0372970735266456	2H	544061306	544062173	-	Uncharacterized protein
HORVU.MOREX.r3.5HG0524500	3.30703154675467	0.0376390740810407	5H	559360497	559363668	+	RING-type E3 ubiquitin transferase (EC 2.3.2.27)
HORVU.MOREX.r3.4HG0354570	3.30757513035345	0.0376659839331795	4H	131517960	131519226	-	PRA1 family protein
HORVU.MOREX.r3.6HG0607960	3.31592246322809	0.0376659839331795	6H	466057648	466061437	-	Similar to A. thaliana protein BAB01483 similar
HORVU.MOREX.r3.2HG0111580	3.32525003818254	0.0377860570511593	2H	37530918	37535049	+	apyrase (EC 3.6.1.5) (ATP-diphosphatase) (ATP-diphosphohydrolase) (Adenosine diphosphatase)
HORVU.MOREX.r3.2HG0113270	3.31007061192093	0.0377860570511593	2H	43624122	43627277	-	HIG1 domain-containing protein
HORVU.MOREX.r3.3HG0218450	3.30105125248052	0.0377860570511593	3H	1166453	1168261	-	Protein RER1
HORVU.MOREX.r3.4HG0400610	3.30531031053573	0.0377860570511593	4H	552158283	552161311	+	NADH dehydrogenase [ubiquinone] 1 alpha subcomplex subunit 13
HORVU.MOREX.r3.6HG0580070	3.30003300816765	0.0379168255654385	6H	204348934	204354872	+	Vacuolar proton pump subunit B (V-ATPase subunit B) (Vacuolar proton pump subunit B)
HORVU.MOREX.r3.1HG0030320	3.29893677906218	0.0380023156415305	1H	148340943	148363285	-	Peroxidase (EC 1.11.1.7)
HORVU.MOREX.r3.1HG0053650	3.29893677906218	0.0380023156415305	1H	358882528	358886777	-	PCI domain-containing protein
HORVU.MOREX.r3.2HG0141530	3.29667752226093	0.0380023156415305	2H	218127029	218131176	+	Actin associated protein
HORVU.MOREX.r3.2HG0165740	3.03643418962747	0.0380023156415305	2H	457042828	457044908	-	DNA-binding protein S1FA
HORVU.MOREX.r3.2HG0149120	3.29513788030525	0.0380522365542297	2H	308875538	308907817	+	Uncharacterized protein
HORVU.MOREX.r3.4HG0405780	3.33349057885349	0.0380955331877638	4H	572103279	572109203	+	Protein kinase domain-containing protein
HORVU.MOREX.r3.1HG0020910	3.30977881144817	0.0381152372905914	1H	75197228	75197928	+	Histone H4
HORVU.MOREX.r3.4HG0356120	3.29775789897769	0.0381176104619663	4H	144440818	144444273	+	EF-hand domain-containing protein
HORVU.MOREX.r3.1HG0029100	3.30021670416841	0.0381407493090269	1H	133599022	133599839	+	Predicted protein
HORVU.MOREX.r3.4HG0418950	3.37444898519831	0.0381407493090269	4H	609899559	609900380	+	Germin-like protein
HORVU.MOREX.r3.3HG0289020	3.29649114655095	0.0382641332347184	3H	487518910	487522518	-	non-specific serine/threonine protein kinase (EC 2.7.11.1)
HORVU.MOREX.r3.4HG0418290	3.29649114655095	0.0382641332347184	4H	608686899	608690253	+	Charged multivesicular body protein 3
HORVU.MOREX.r3.1HG0052810	3.29074446507598	0.0383370214644064	1H	352522768	352524613	-	Mitochondrial carnitine/acylcarnitine carrier-like protein
HORVU.MOREX.r3.1HG0073850	3.29014634436696	0.0383370214644064	1H	463905331	463911246	-	PRA1 family protein
HORVU.MOREX.r3.2HG0128630	3.29015330633253	0.0383370214644064	2H	118003316	118008406	-	Predicted protein
HORVU.MOREX.r3.2HG0188850	3.33137215068639	0.0383370214644064	2H	593730098	593732056	-	Glutathione peroxidase
HORVU.MOREX.r3.4HG0397640	3.30530883503688	0.0383370214644064	4H	538939514	538941224	+	Predicted protein
HORVU.MOREX.r3.5HG0461290	3.28952109067434	0.0383370214644064	5H	301060083	301066986	-	Calcium-transporting ATPase (EC 7.2.2.10)
HORVU.MOREX.r3.5HG0469190	3.29513725230978	0.0383370214644064	5H	358104862	358110005	+	Predicted protein
HORVU.MOREX.r3.5HG0493330	-3.13145465336712	0.0383370214644064	5H	485446367	485448195	-	UDP-glucuronate 4-epimerase (EC 5.1.3.6)
HORVU.MOREX.r3.5HG0509430	3.33617636274947	0.0383370214644064	5H	523880523	523883020	+	Predicted protein
HORVU.MOREX.r3.6HG0631640	3.29014634436696	0.0383370214644064	6H	557097549	557099729	-	Predicted protein
HORVU.MOREX.r3.7HG0741650	3.31042078962816	0.0383370214644064	7H	608107035	608107878	-	Histone H2A
HORVU.MOREX.r3.1HG0082770	3.02589629772952	0.0383522216887585	1H	490808498	490811061	+	Reticulon-like protein
HORVU.MOREX.r3.2HG0199260	3.04158503858616	0.0385048818996217	2H	621960044	621962628	-	Glycosyltransferase 61 catalytic domain-containing protein
HORVU.MOREX.r3.3HG0236620	3.02850685381038	0.0385048818996217	3H	45880177	45885608	+	Mitochondrial-processing peptidase subunit alpha
HORVU.MOREX.r3.7HG0704180	3.29229166062136	0.0385048818996217	7H	419812554	419816841	+	COP9 signalosome complex subunit 3
HORVU.MOREX.r3.3HG0327170	3.31092262933078	0.0385866469393235	3H	611991612	611995830	-	Predicted protein
HORVU.MOREX.r3.7HG0712940	3.31092262933078	0.0385866469393235	7H	484131012	484132559	-	WRKY domain-containing protein
HORVU.MOREX.r3.3HG0290920	3.02234792621458	0.0386303961800788	3H	498631138	498635646	-	Uncharacterized protein
HORVU.MOREX.r3.1HG0066010	3.28247498926355	0.0387173652954482	1H	431746884	431747500	-	Predicted protein
HORVU.MOREX.r3.4HG0378540	3.28247498926355	0.0387173652954482	4H	391615074	391617163	-	Macro domain-containing protein
HORVU.MOREX.r3.5HG0508180	3.28280671215963	0.0387521870521659	5H	521100398	521107480	+	Translation initiation factor eIF2B subunit delta (eIF2B GDP-GTP exchange factor subunit delta)
HORVU.MOREX.r3.5HG0518250	3.28616682366497	0.0388651546568618	5H	545566599	545570072	+	FRIGIDA-like protein
HORVU.MOREX.r3.5HG0446870	3.28126693794002	0.038867888664006	5H	135430849	135441182	-	Probable bifunctional methylthioribulose-1-phosphate dehydratase/enolase-phosphatase E1 [Includes: Methylthioribulose-1-phosphate dehydratase (MTRu-1-P dehydratase) (EC 4.2.1.109); Enolase-phosphatase E1 (EC 3.1.3.77) (2,3-diketo-5-methylthio-1-phosphopentane phosphatase)]
HORVU.MOREX.r3.2HG0111820	3.27685571146441	0.0388991178690434	2H	38825523	38828806	+	Predicted protein
HORVU.MOREX.r3.7HG0731630	3.28430844241871	0.0390071271479465	7H	581327538	581328369	+	Predicted protein
HORVU.MOREX.r3.4HG0408980	3.28465918428624	0.0390972996547802	4H	584592751	584594431	-	Methyltransferase (EC 2.1.1.-)
HORVU.MOREX.r3.2HG0176180	3.28473708907324	0.0391273170431011	2H	531027053	531039844	-	peptide-methionine (S)-S-oxide reductase (EC 1.8.4.11) (Peptide-methionine (S)-S-oxide reductase) (Protein-methionine-S-oxide reductase)
HORVU.MOREX.r3.1HG0041280	3.27231709401146	0.0391738474172085	1H	262442378	262446639	+	Cellulose synthase (EC 2.4.1.12)
HORVU.MOREX.r3.5HG0477470	3.27078382283722	0.0392324994962886	5H	412654752	412657124	+	Predicted protein
HORVU.MOREX.r3.4HG0379640	3.26992983625356	0.0392413573125372	4H	403790858	403792793	+	Predicted protein
HORVU.MOREX.r3.5HG0519270	3.27481098674967	0.0392413573125372	5H	548022286	548023048	+	Uncharacterized protein
HORVU.MOREX.r3.7HG0681550	3.26992983625356	0.0392413573125372	7H	186801100	186809084	+	Auxin response factor
HORVU.MOREX.r3.4HG0347740	3.28305780718035	0.0392626333920122	4H	79401672	79408095	-	Transmembrane 9 superfamily member
HORVU.MOREX.r3.4HG0414460	3.0105056178951	0.0392626333920122	4H	599297296	599304350	-	C2 NT-type domain-containing protein
HORVU.MOREX.r3.5HG0497370	3.00930376629557	0.0392626333920122	5H	494768252	494772543	+	DEAD-box ATP-dependent RNA helicase 7 (EC 3.6.4.13)
HORVU.MOREX.r3.7HG0684820	3.26901014945156	0.0392626333920122	7H	212009338	212013387	+	NAC transcription factor
HORVU.MOREX.r3.7HG0731860	3.2753322135781	0.0392626333920122	7H	582399864	582406166	-	Predicted protein
HORVU.MOREX.r3.2HG0123910	3.27229615029948	0.0392744978933176	2H	91816072	91820858	-	non-specific serine/threonine protein kinase (EC 2.7.11.1)
HORVU.MOREX.r3.5HG0479410	3.27229615029948	0.0392744978933176	5H	426267914	426272931	+	Ubiquitin receptor RAD23 (DNA repair protein RAD23)
HORVU.MOREX.r3.7HG0702290	3.26801890101131	0.0392744978933176	7H	404083853	404086973	-	Tryptophan synthase (EC 4.2.1.20)
HORVU.MOREX.r3.7HG0737960	3.27581742140012	0.0392744978933176	7H	598769590	598770839	-	Glutathione S-transferase (EC 2.5.1.18)
HORVU.MOREX.r3.5HG0502070	3.29249907073898	0.0393033268150564	5H	508615348	508618203	-	Protein CWC15 homolog
HORVU.MOREX.r3.2HG0106380	3.2636067403199	0.0395326738258584	2H	23415963	23422329	+	S-acyltransferase (EC 2.3.1.225) (Palmitoyltransferase)
HORVU.MOREX.r3.5HG0420730	3.26200019844803	0.0396226997398441	5H	3689613	3691499	+	Small-subunit processome Utp12 domain-containing protein
HORVU.MOREX.r3.4HG0419240	3.32233099779029	0.039728972553714	4H	610095820	610096641	+	Germin-like protein
HORVU.MOREX.r3.5HG0446340	3.26948541271477	0.039728972553714	5H	128220908	128224508	+	Predicted protein
HORVU.MOREX.r3.7HG0636540	3.26948541271477	0.039728972553714	7H	4423166	4425585	+	Polygalacturonase
HORVU.MOREX.r3.7HG0677850	3.26726196340887	0.039728972553714	7H	160202156	160203122	+	Predicted protein
HORVU.MOREX.r3.2HG0104640	3.26773108561498	0.0398279981878422	2H	18230875	18236209	+	Glucose-6-phosphate 1-dehydrogenase (EC 1.1.1.49)
HORVU.MOREX.r3.5HG0451540	3.27386526907727	0.0398279981878422	5H	193863210	193869115	-	Predicted protein
HORVU.MOREX.r3.2HG0108450	3.25557581689562	0.0400546581879699	2H	27979711	27982657	-	Protein kinase domain-containing protein
HORVU.MOREX.r3.2HG0140420	3.25754403253271	0.0400574372597419	2H	208689733	208696334	+	Thioredoxin domain-containing protein
HORVU.MOREX.r3.3HG0295570	3.25482119369567	0.0400574372597419	3H	520442607	520445018	-	Predicted protein
HORVU.MOREX.r3.5HG0423060	3.2777374101973	0.0400574372597419	5H	7465747	7466666	-	Thaumatin-like protein
HORVU.MOREX.r3.6HG0596420	3.29361925321614	0.0400663237530042	6H	376675821	376676734	+	Myb-related protein Myb4
HORVU.MOREX.r3.3HG0218370	3.25811281951189	0.0400894942221272	3H	977222	982169	+	1-deoxy-D-xylulose-5-phosphate reductoisomerase (EC 1.1.1.267)
HORVU.MOREX.r3.3HG0318650	3.25546214999716	0.0403711817955795	3H	592942555	592945625	-	BI1-like protein
HORVU.MOREX.r3.6HG0544290	3.25958375700059	0.0404537716788923	6H	14467765	14470219	-	Phospholipid/glycerol acyltransferase domain-containing protein
HORVU.MOREX.r3.4HG0401170	3.00419007302345	0.0404883830733035	4H	554855188	554855975	+	Blue copper binding protein
HORVU.MOREX.r3.1HG0010930	3.31147835988177	0.0405076044069809	1H	25742392	25745210	-	Uncharacterized protein
HORVU.MOREX.r3.4HG0414340	3.31293189641847	0.0405076044069809	4H	599147311	599147969	-	Uncharacterized protein
HORVU.MOREX.r3.2HG0156390	3.00132269816612	0.040511184083087	2H	377327975	377332874	-	Casein kinase II subunit alpha (CK II alpha) (EC 2.7.11.1)
HORVU.MOREX.r3.4HG0403700	3.24674886733944	0.040511184083087	4H	565412573	565415200	+	Predicted protein
HORVU.MOREX.r3.7HG0650910	3.24595806984598	0.0405327657250879	7H	31483075	31484774	-	Predicted protein
HORVU.MOREX.r3.2HG0116440	3.25868214903629	0.0405719149576884	2H	54562866	54568361	-	Ubiquitin carboxyl-terminal hydrolase (EC 3.4.19.12)
HORVU.MOREX.r3.4HG0418600	3.27837632273704	0.0406032730921464	4H	609478184	609481591	+	arsenate reductase (glutathione/glutaredoxin) (EC 1.20.4.1)
HORVU.MOREX.r3.4HG0405710	3.33316678145618	0.040661586651838	4H	571707925	571708933	-	AP2/ERF domain-containing protein
HORVU.MOREX.r3.1HG0032540	3.2504652283179	0.0406881807827622	1H	165020970	165023606	-	Uncharacterized protein
HORVU.MOREX.r3.1HG0067500	3.2504652283179	0.0406881807827622	1H	438819767	438822513	-	Predicted protein
HORVU.MOREX.r3.1HG0077250	2.99484366217733	0.0407618669296882	1H	477768498	477770485	-	Cyclic phosphodiesterase
HORVU.MOREX.r3.6HG0615560	3.0095693939703	0.0407618669296882	6H	507941146	507942104	+	Predicted protein
HORVU.MOREX.r3.3HG0263400	3.25093901916012	0.0407670603819723	3H	277534424	277539362	-	YTH domain-containing family protein
HORVU.MOREX.r3.2HG0149130	3.27852728802147	0.0407802235324871	2H	308999220	309019562	+	E2 ubiquitin-conjugating enzyme (EC 2.3.2.23)
HORVU.MOREX.r3.5HG0444100	3.24626903523417	0.0408573755947302	5H	110545691	110545976	-	Bet v I/Major latex protein domain-containing protein
HORVU.MOREX.r3.4HG0348030	2.98194497177168	0.040911877015804	4H	81417054	81417893	+	Dirigent protein
HORVU.MOREX.r3.4HG0404450	3.23784439689875	0.040911877015804	4H	567493521	567498171	+	CN hydrolase domain-containing protein
HORVU.MOREX.r3.5HG0501870	3.23784439689875	0.040911877015804	5H	508199543	508201201	+	Glycosyltransferase (EC 2.4.1.-)
HORVU.MOREX.r3.5HG0504760	3.23999861264153	0.040911877015804	5H	513797733	513802872	-	E2 ubiquitin-conjugating enzyme (EC 2.3.2.23)
HORVU.MOREX.r3.4HG0406580	3.23701485193963	0.0409251446162941	4H	575310728	575311401	-	Predicted protein
HORVU.MOREX.r3.5HG0436650	3.23701485193963	0.0409251446162941	5H	55080091	55085450	-	LIM zinc-binding domain-containing protein
HORVU.MOREX.r3.2HG0214130	3.23973963874999	0.0409641679233659	2H	655826476	655828669	-	4-coumarate--CoA ligase (EC 6.2.1.12)
HORVU.MOREX.r3.3HG0280060	3.24119672623924	0.0409641679233659	3H	430694490	430695587	-	Predicted protein
HORVU.MOREX.r3.3HG0303070	3.24481129226999	0.0409641679233659	3H	551664775	551668120	+	Uncharacterized protein
HORVU.MOREX.r3.4HG0393630	2.98099155093322	0.0409641679233659	4H	514100646	514105465	-	Transmembrane 9 superfamily member
HORVU.MOREX.r3.3HG0323480	3.23515635596739	0.0410197429144793	3H	604193891	604198859	-	RRM domain-containing protein
HORVU.MOREX.r3.6HG0568570	3.23411545908206	0.0411531934443756	6H	113339201	113341024	-	Predicted protein
HORVU.MOREX.r3.3HG0285310	3.24325736645724	0.0411545880029225	3H	465447472	465452689	-	Uncharacterized protein
HORVU.MOREX.r3.6HG0543740	3.02016062035502	0.0411545880029225	6H	13485601	13486454	-	Histone H2A
HORVU.MOREX.r3.7HG0728000	3.24325736645724	0.0411545880029225	7H	568561364	568563182	-	Glycosyltransferase (EC 2.4.1.-)
HORVU.MOREX.r3.7HG0661890	3.242683971673	0.0411661679268674	7H	68098932	68103406	-	3-oxoacyl-[acyl-carrier-protein] synthase
HORVU.MOREX.r3.7HG0733110	2.29861772676719	0.0412742275267574	7H	586675136	586677762	-	Predicted protein
HORVU.MOREX.r3.2HG0135510	3.23111686943789	0.0412914346182922	2H	170845728	170850680	-	MSP domain-containing protein
HORVU.MOREX.r3.3HG0318580	3.24309917788028	0.0412914346182922	3H	592827798	592829147	+	Uncharacterized protein
HORVU.MOREX.r3.2HG0198000	2.29915956126971	0.0413348590210027	2H	619951931	619955373	+	Predicted protein
HORVU.MOREX.r3.3HG0297700	3.23236964674662	0.0413348590210027	3H	530826483	530899009	+	Expansin
HORVU.MOREX.r3.5HG0490330	3.22798889421936	0.0413389319212019	5H	475975837	475977722	+	Uncharacterized protein
HORVU.MOREX.r3.2HG0173680	2.97603747225057	0.0413942358270328	2H	514611751	514614947	-	anthranilate synthase (EC 4.1.3.27)
HORVU.MOREX.r3.3HG0229650	3.22603486217585	0.0415482104087832	3H	21589444	21610876	+	threonine--tRNA ligase (EC 6.1.1.3) (Threonyl-tRNA synthetase)
HORVU.MOREX.r3.4HG0337220	3.26183313556563	0.0416756541894127	4H	17693097	17697106	+	Small ribosomal subunit protein mS41 SAM domain-containing protein
HORVU.MOREX.r3.1HG0047660	3.22907918630526	0.0417129947104135	1H	312148403	312151712	+	Calcium uniporter protein C-terminal domain-containing protein
HORVU.MOREX.r3.1HG0072140	3.22907918630526	0.0417129947104135	1H	457315187	457318055	-	Ammonium transporter
HORVU.MOREX.r3.1HG0086940	3.22907918630526	0.0417129947104135	1H	498533917	498537446	+	Predicted protein
HORVU.MOREX.r3.7HG0649550	3.23436488921696	0.0417129947104135	7H	28314205	28315023	+	Early nodulin
HORVU.MOREX.r3.2HG0109330	3.22215971296254	0.0417159256488659	2H	29995301	29995559	-	Secreted protein
HORVU.MOREX.r3.2HG0154530	3.2237584407364	0.0417159256488659	2H	367707379	367708053	+	Uncharacterized protein
HORVU.MOREX.r3.2HG0190710	3.22142855580792	0.0417159256488659	2H	600381722	600385114	-	2,4-dienoyl-CoA reductase [(3E)-enoyl-CoA-producing] (EC 1.3.1.124)
HORVU.MOREX.r3.7HG0716940	3.2237584407364	0.0417159256488659	7H	505800776	505805066	-	L-ascorbate oxidase (EC 1.10.3.3)
HORVU.MOREX.r3.4HG0338620	3.24929695057021	0.0418576556401104	4H	23037464	23038388	-	Uncharacterized protein
HORVU.MOREX.r3.6HG0588960	3.24375073766047	0.0418576556401104	6H	310497833	310503292	-	Small nuclear ribonucleoprotein Sm D1 (snRNP core protein D1)
HORVU.MOREX.r3.5HG0532580	3.22459858837348	0.0418769005138039	5H	576518064	576520697	-	Predicted protein
HORVU.MOREX.r3.7HG0643170	3.22248588106858	0.0418769005138039	7H	16136556	16141378	-	Predicted protein
HORVU.MOREX.r3.1HG0035230	3.21788911590421	0.0418833094677321	1H	199698697	199710379	-	ER membrane protein complex subunit 1
HORVU.MOREX.r3.6HG0550950	3.21788911590421	0.0418833094677321	6H	29230728	29234717	-	NADP-dependent oxidoreductase domain-containing protein
HORVU.MOREX.r3.4HG0419010	3.32926388864494	0.0421187807876385	4H	609931891	609932712	+	Germin-like protein
HORVU.MOREX.r3.7HG0711890	2.97280489335739	0.0421187807876385	7H	475690209	475692294	+	Predicted protein
HORVU.MOREX.r3.7HG0734860	2.96339648540865	0.0421187807876385	7H	590885151	590887891	+	Predicted protein
HORVU.MOREX.r3.2HG0210420	3.21566954117571	0.0421525918257758	2H	647787650	647793657	+	dolichyl-diphosphooligosaccharide--protein glycotransferase (EC 2.4.99.18)
HORVU.MOREX.r3.1HG0084920	3.2786270504767	0.0421866482739813	1H	494869938	494872474	-	ER membrane protein complex subunit 6
HORVU.MOREX.r3.1HG0025550	3.21235828079049	0.04220135568434	1H	103824864	103830594	+	PHD finger protein ALFIN-LIKE
HORVU.MOREX.r3.5HG0449190	3.23030012708796	0.0422160525058009	5H	157054538	157067045	-	La-related protein 6B
HORVU.MOREX.r3.5HG0477750	3.23030012708796	0.0422160525058009	5H	414953794	414957947	-	Homeobox-leucine zipper protein (HD-ZIP protein) (Homeodomain transcription factor)
HORVU.MOREX.r3.1HG0089030	3.22429696640407	0.0422435343373337	1H	501995633	501999750	+	NAD-dependent epimerase/dehydratase domain-containing protein
HORVU.MOREX.r3.2HG0194530	3.21567815955588	0.0422435343373337	2H	610058155	610062876	+	Vacuolar cation/proton exchanger
HORVU.MOREX.r3.3HG0237450	2.95996468359531	0.0422435343373337	3H	51987480	51992981	+	glutamine--tRNA ligase (EC 6.1.1.18) (Glutaminyl-tRNA synthetase)
HORVU.MOREX.r3.3HG0289780	2.95823095514779	0.0422435343373337	3H	492173959	492182836	-	La-related protein 6A
HORVU.MOREX.r3.5HG0476660	3.21567815955588	0.0422435343373337	5H	409225677	409231416	+	Serine-threonine kinase receptor-associated protein
HORVU.MOREX.r3.7HG0636660	3.20967757095239	0.0422601285089006	7H	4582835	4584926	+	SKP1-like protein
HORVU.MOREX.r3.2HG0204260	3.21309019380861	0.0423891828929253	2H	633686848	633689810	-	beta-aspartyl-peptidase (EC 3.4.19.5)
HORVU.MOREX.r3.7HG0684530	3.21668706431017	0.0424535592606565	7H	210171349	210174860	+	Predicted protein
HORVU.MOREX.r3.7HG0714930	3.21165403358017	0.0426536070345794	7H	496776605	496779838	-	Predicted protein
HORVU.MOREX.r3.6HG0620330	2.95714462519173	0.0426574225940042	6H	527623845	527627927	-	Heat shock cognate 70 kDa protein
HORVU.MOREX.r3.1HG0023230	3.22699622676363	0.0426694121946475	1H	88997602	89004928	-	RING-type domain-containing protein
HORVU.MOREX.r3.1HG0065030	3.20630172892146	0.0426798137542542	1H	426980549	426984989	+	SUZ domain-containing protein
HORVU.MOREX.r3.6HG0543770	3.20609125126069	0.0426878828345251	6H	13556631	13557427	+	Histone H2A
HORVU.MOREX.r3.3HG0278110	3.20668650670453	0.0427519306642888	3H	416089589	416095332	+	mitogen-activated protein kinase (EC 2.7.11.24)
HORVU.MOREX.r3.4HG0406650	3.24271165312917	0.0429648776162983	4H	575399855	575400493	-	Predicted protein
HORVU.MOREX.r3.1HG0079020	-2.47251206821742	0.0432682436044123	1H	482712247	482717413	+	Protein kinase domain-containing protein
HORVU.MOREX.r3.1HG0006650	1.73806155746916	0.043296863460354	1H	14097772	14098865	+	Histone H2A
HORVU.MOREX.r3.1HG0076280	3.22433499831079	0.043296863460354	1H	474544209	474557403	+	KOW domain-containing protein
HORVU.MOREX.r3.3HG0314470	3.19699528142363	0.043296863460354	3H	585872518	585875903	+	Predicted protein
HORVU.MOREX.r3.7HG0693910	3.19559602291464	0.043296863460354	7H	308104918	308131403	+	Fucosyltransferase (EC 2.4.1.-)
HORVU.MOREX.r3.4HG0384700	3.21280808630845	0.043349734130308	4H	450235432	450237352	-	protein-serine/threonine phosphatase (EC 3.1.3.16)
HORVU.MOREX.r3.7HG0675670	3.23517771443684	0.043349734130308	7H	144774670	144775679	-	Chaperone DnaJ C-terminal domain-containing protein
HORVU.MOREX.r3.7HG0636010	3.19819569168347	0.0434019763270077	7H	3832912	3834836	+	Glycosyltransferase (EC 2.4.1.-)
HORVU.MOREX.r3.1HG0078110	3.19206754328751	0.0434486612012263	1H	480225815	480227108	-	Fe2OG dioxygenase domain-containing protein
HORVU.MOREX.r3.6HG0556730	3.19546088724662	0.043604881975132	6H	50673391	50676072	-	Cell wall hydroxyproline-rich glycoprotein
HORVU.MOREX.r3.3HG0291870	3.18635305894534	0.0439183948029243	3H	502399382	502400840	+	Peroxidase (EC 1.11.1.7)
HORVU.MOREX.r3.4HG0419260	3.32066992593984	0.0439183948029243	4H	610105364	610106185	+	Germin-like protein
HORVU.MOREX.r3.6HG0621910	3.18553028283331	0.043929926963212	6H	531813197	531821088	+	H(+)-exporting diphosphatase (EC 7.1.3.1)
HORVU.MOREX.r3.2HG0108630	3.18368041630521	0.0440713907290814	2H	28201815	28202934	-	Abscisic acid receptor PYL4
HORVU.MOREX.r3.7HG0687080	3.18368041630521	0.0440713907290814	7H	230689668	230693578	+	Predicted protein
HORVU.MOREX.r3.2HG0135400	3.18963618586548	0.0440827620373643	2H	170584117	170585462	+	Uncharacterized protein
HORVU.MOREX.r3.4HG0334180	3.18726171757661	0.0440827620373643	4H	7842347	7844647	+	E3 ubiquitin-protein ligase RMA (EC 2.3.2.27) (Protein RING membrane-anchor) (RING-type E3 ubiquitin transferase RMA)
HORVU.MOREX.r3.6HG0611370	3.19241262036538	0.0440827620373643	6H	487241889	487243991	-	Predicted protein
HORVU.MOREX.r3.6HG0613690	2.93158188518604	0.0440827620373643	6H	496883855	496886592	+	Annexin
HORVU.MOREX.r3.2HG0116320	3.18264116183745	0.0440929497782369	2H	54119601	54121654	+	Uncharacterized protein
HORVU.MOREX.r3.5HG0424990	3.18151737992603	0.0442562293021117	5H	10721811	10725973	-	N-carbamoylputrescine amidase (EC 3.5.1.53)
HORVU.MOREX.r3.1HG0027850	3.18581863502761	0.0443241649567986	1H	126045056	126051060	+	Cellulose synthase (EC 2.4.1.12)
HORVU.MOREX.r3.7HG0677940	3.17782539000143	0.044471236663243	7H	160630124	160633353	-	Transmembrane 9 superfamily member
HORVU.MOREX.r3.1HG0023610	3.17925227904865	0.0444949558650955	1H	91259169	91259684	-	Histone H4
HORVU.MOREX.r3.7HG0640130	3.17615973287682	0.0445103506385968	7H	10419166	10423336	-	Flavonoid 3',5'-hydroxylase
HORVU.MOREX.r3.4HG0358490	3.20670261325365	0.0445193020445242	4H	161905925	161908526	+	Charged multivesicular body protein 2a
HORVU.MOREX.r3.5HG0432950	3.20101252781379	0.0445319798257719	5H	41432541	41443370	+	NADP-dependent oxidoreductase domain-containing protein
HORVU.MOREX.r3.5HG0484270	3.1752242180854	0.0445319798257719	5H	447397952	447399436	-	Uncharacterized protein
HORVU.MOREX.r3.5HG0536550	3.18047189510293	0.0445530241579253	5H	583781536	583783979	-	Coatomer subunit zeta
HORVU.MOREX.r3.5HG0481760	3.1914228134439	0.0445731455663537	5H	438664472	438666917	-	AB hydrolase-1 domain-containing protein
HORVU.MOREX.r3.3HG0299540	3.17421215562362	0.0445908578179274	3H	537609057	537614178	-	Protein YIP
HORVU.MOREX.r3.6HG0558810	3.18100929525293	0.0446210441381874	6H	60754051	60754732	-	Histone H2A
HORVU.MOREX.r3.7HG0703490	2.26256603089165	0.0447764670288775	7H	414666132	414670878	-	Amino acid transporter transmembrane domain-containing protein
HORVU.MOREX.r3.1HG0042320	3.19205557978439	0.0450243217825564	1H	272582499	272609485	-	UDP-glucose:glycoprotein glucosyltransferase
HORVU.MOREX.r3.3HG0253800	3.16994893472941	0.0450243217825564	3H	175551249	175558137	-	U6 snRNA-associated Sm-like protein LSm4
HORVU.MOREX.r3.7HG0720110	3.16922887066188	0.0450243217825564	7H	529090068	529094637	-	WRKY19-like zinc finger domain-containing protein
HORVU.MOREX.r3.2HG0127150	3.16760866768483	0.0450322041011911	2H	110566074	110572059	+	Probable 6-phosphogluconolactonase (EC 3.1.1.31)
HORVU.MOREX.r3.3HG0286490	3.17061459557564	0.045032256036594	3H	471947560	471952534	+	non-specific serine/threonine protein kinase (EC 2.7.11.1)
HORVU.MOREX.r3.2HG0167220	3.16669817880789	0.0450381386779495	2H	468891891	468896081	+	2-Cys peroxiredoxin BAS1, chloroplastic (EC 1.11.1.24) (Thiol-specific antioxidant protein) (Thioredoxin-dependent peroxiredoxin BAS1)
HORVU.MOREX.r3.5HG0508020	3.16669817880789	0.0450381386779495	5H	520542992	520546181	+	Expp1 protein
HORVU.MOREX.r3.4HG0400730	2.91836875723072	0.045038883326094	4H	552503557	552508289	-	Cell division cycle protein 48 homolog
HORVU.MOREX.r3.2HG0213640	3.169277101192	0.0452166253760087	2H	654462355	654466268	+	Nudix hydrolase domain-containing protein
HORVU.MOREX.r3.5HG0496050	3.17445398863131	0.0452166253760087	5H	492061792	492063388	+	Predicted protein
HORVU.MOREX.r3.7HG0704810	3.16464640155247	0.0452166253760087	7H	426748539	426751380	+	L-gulonolactone oxidase (EC 1.1.3.8)
HORVU.MOREX.r3.3HG0298070	3.17278498927745	0.0454419570432212	3H	532106799	532111486	+	Amino acid transporter transmembrane domain-containing protein
HORVU.MOREX.r3.2HG0208710	3.16224523664244	0.0456075175586273	2H	644050816	644051056	+	Uncharacterized protein
HORVU.MOREX.r3.2HG0127290	3.15810148975115	0.0456966032873708	2H	110945068	110948961	-	Predicted protein
HORVU.MOREX.r3.4HG0389470	2.24688893329593	0.045781357285842	4H	484422751	484424664	-	LIM zinc-binding domain-containing protein
HORVU.MOREX.r3.1HG0041680	3.16089949889375	0.0457867665221024	1H	266762841	266765104	+	Predicted protein
HORVU.MOREX.r3.7HG0637280	3.16089949889375	0.0457867665221024	7H	5259225	5268079	+	Alpha-dioxygenase 1
HORVU.MOREX.r3.6HG0612570	3.16304531982389	0.0458872065602223	6H	492098330	492101025	-	Predicted protein
HORVU.MOREX.r3.1HG0001120	3.1635435682039	0.045994661297434	1H	2577002	2580483	-	Predicted protein
HORVU.MOREX.r3.3HG0286820	3.18353008222086	0.045994661297434	3H	473391845	473392473	-	Mitochondrial import receptor subunit TOM7-1
HORVU.MOREX.r3.4HG0334410	3.15497984548357	0.045994661297434	4H	8813379	8817590	+	E2 ubiquitin-conjugating enzyme (EC 2.3.2.23)
HORVU.MOREX.r3.1HG0028570	-2.96324535007864	0.0460243170651666	1H	132252521	132252818	-	Uncharacterized protein
HORVU.MOREX.r3.3HG0234660	3.15376363514931	0.0461273989725582	3H	36822012	36825426	+	Sugar phosphate transporter domain-containing protein
HORVU.MOREX.r3.1HG0041260	3.17503413764215	0.0462136269524146	1H	262437910	262441629	+	eIF-(iso)4F 25 kDa subunit (eIF-(iso)4F p28 subunit) (mRNA cap-binding protein)
HORVU.MOREX.r3.1HG0022060	3.15250318823457	0.0462655101805202	1H	81463862	81470266	-	Cullin-1
HORVU.MOREX.r3.5HG0530740	3.15250318823457	0.0462655101805202	5H	573127085	573130170	-	Receptor-like serine/threonine-protein kinase (EC 2.7.11.1)
HORVU.MOREX.r3.1HG0053170	3.16439854857039	0.0463114301854657	1H	355044267	355046930	+	Transcription factor (bHLH transcription factor) (Basic helix-loop-helix protein)
HORVU.MOREX.r3.7HG0726260	3.15312772844822	0.0463114301854657	7H	561294004	561296485	+	Predicted protein
HORVU.MOREX.r3.5HG0493890	3.14748944731188	0.0463872645171404	5H	486905407	486908270	-	Beta-ureidopropionase (EC 3.5.1.6) (N-carbamoyl-beta-alanine amidohydrolase)
HORVU.MOREX.r3.5HG0486770	3.16696423498653	0.0466882634497528	5H	461793784	461813797	+	Predicted protein
HORVU.MOREX.r3.7HG0685540	3.16696423498653	0.0466882634497528	7H	216577832	216579349	+	spermidine synthase (EC 2.5.1.16)
HORVU.MOREX.r3.7HG0733640	3.16507387850627	0.0467947382166618	7H	587459386	587461789	+	Uncharacterized protein
HORVU.MOREX.r3.1HG0020270	3.14427591834838	0.0468974155623317	1H	72451223	72454582	+	Predicted protein
HORVU.MOREX.r3.2HG0113380	3.1423029784858	0.0468974155623317	2H	43788869	43793266	+	Predicted protein
HORVU.MOREX.r3.3HG0266050	3.14427591834838	0.0468974155623317	3H	309730475	309734312	-	Uncharacterized protein
HORVU.MOREX.r3.3HG0289150	3.14367248055819	0.0468974155623317	3H	488056146	488060537	-	3-hydroxyisobutyryl-CoA hydrolase (HIB-CoA hydrolase) (HIBYL-CoA-H) (EC 3.1.2.4) (3-hydroxyisobutyryl-coenzyme A hydrolase)
HORVU.MOREX.r3.3HG0311730	3.14301582245892	0.0468974155623317	3H	578446283	578449646	-	S-acyltransferase (EC 2.3.1.225) (Palmitoyltransferase)
HORVU.MOREX.r3.4HG0335960	3.13880163815113	0.0468974155623317	4H	13331415	13333953	+	Uncharacterized protein
HORVU.MOREX.r3.4HG0365770	2.89665944041269	0.0468974155623317	4H	243764617	243772780	+	W2 domain-containing protein
HORVU.MOREX.r3.5HG0495820	3.13978518884192	0.0468974155623317	5H	491302278	491303147	+	Uncharacterized protein
HORVU.MOREX.r3.5HG0512510	3.16534195545602	0.0468974155623317	5H	531511188	531514022	-	Subtilisin-like protease
HORVU.MOREX.r3.6HG0577300	3.13880163815113	0.0468974155623317	6H	179915303	179917524	+	3-ketoacyl-CoA synthase (EC 2.3.1.-)
HORVU.MOREX.r3.7HG0751120	3.13880163815113	0.0468974155623317	7H	626856147	626865075	+	Calcium-binding EF hand family protein
HORVU.MOREX.r3.4HG0339790	3.14254410553677	0.0469056612610283	4H	27305190	27308815	-	4-hydroxy-3-methylbut-2-enyl diphosphate reductase (EC 1.17.7.4)
HORVU.MOREX.r3.6HG0609680	3.14788302687366	0.0469056612610283	6H	477008021	477011953	-	Uncharacterized protein
HORVU.MOREX.r3.1HG0048100	3.15882769340431	0.0469367695625508	1H	316153152	316158562	+	Malic enzyme
HORVU.MOREX.r3.7HG0676880	3.13773564211657	0.0469367695625508	7H	154117116	154119720	-	BolA-like protein
HORVU.MOREX.r3.2HG0130600	3.1525968942576	0.0470503906512182	2H	133601497	133604264	-	U-box domain-containing protein 4
HORVU.MOREX.r3.3HG0304710	2.88656961519682	0.0471969846119881	3H	556808039	556810439	+	Fructose-bisphosphate aldolase (EC 4.1.2.13)
HORVU.MOREX.r3.3HG0240640	3.13533076924549	0.047239658779087	3H	73070597	73072367	+	Glycosyltransferase (EC 2.4.1.-)
HORVU.MOREX.r3.6HG0546200	3.1457853284197	0.047239658779087	6H	16951911	16952828	-	RNA polymerase Rpb4/RPC9 core domain-containing protein
HORVU.MOREX.r3.6HG0628510	2.88580152387858	0.047239658779087	6H	550153633	550162281	+	Uncharacterized protein
HORVU.MOREX.r3.4HG0333250	3.13344231180938	0.0473364817311922	4H	5311108	5313572	-	Predicted protein
HORVU.MOREX.r3.2HG0175420	3.13413311312849	0.0473411263998207	2H	525832191	525835503	+	Plant intracellular Ras-group-related LRR protein 3
HORVU.MOREX.r3.3HG0325580	3.13413311312849	0.0473411263998207	3H	609083090	609094703	-	Uncharacterized protein
HORVU.MOREX.r3.5HG0468240	3.15062506656923	0.0473411263998207	5H	350508087	350518667	+	Kinesin motor domain-containing protein
HORVU.MOREX.r3.6HG0597790	3.13398022650192	0.0473411263998207	6H	388187834	388189238	-	Predicted protein
HORVU.MOREX.r3.7HG0706320	3.13476812208169	0.0473411263998207	7H	436904834	436912391	-	SAC domain-containing protein
HORVU.MOREX.r3.7HG0727080	2.88362491226122	0.0473411263998207	7H	565049998	565053260	-	DUF7794 domain-containing protein
HORVU.MOREX.r3.6HG0575710	3.17501081908954	0.0473977821859788	6H	168432870	168435892	-	Cyclase
HORVU.MOREX.r3.1HG0079220	3.13534849551361	0.0474026640944356	1H	483374225	483375249	-	Predicted protein
HORVU.MOREX.r3.6HG0589780	3.12900231928841	0.0474026640944356	6H	319255316	319259970	+	glycerophosphodiester phosphodiesterase (EC 3.1.4.46)
HORVU.MOREX.r3.6HG0581810	3.18459754953112	0.047550448139365	6H	224943375	224969254	-	Xaa-Pro dipeptidase (EC 3.4.13.9) (Imidodipeptidase) (Peptidase D) (Proline dipeptidase)
HORVU.MOREX.r3.6HG0545480	3.12665924550202	0.04771135416891	6H	16058167	16063648	+	Catalase (EC 1.11.1.6)
HORVU.MOREX.r3.6HG0622620	3.12665924550202	0.04771135416891	6H	534049989	534053708	-	Predicted protein
HORVU.MOREX.r3.5HG0431780	3.14855328575617	0.0477116006683709	5H	34035783	34039929	-	homocysteine S-methyltransferase (EC 2.1.1.10)
HORVU.MOREX.r3.1HG0064540	3.13095903989268	0.0477969224156403	1H	424392963	424400008	+	Predicted protein
HORVU.MOREX.r3.2HG0133450	3.12534137263143	0.0477969224156403	2H	156856088	156857635	-	Remorin C-terminal domain-containing protein
HORVU.MOREX.r3.2HG0183830	3.12534137263143	0.0477969224156403	2H	567079892	567083808	-	E3 ubiquitin-protein ligase RMA (EC 2.3.2.27) (Protein RING membrane-anchor) (RING-type E3 ubiquitin transferase RMA)
HORVU.MOREX.r3.3HG0310930	3.1659587781161	0.0477969224156403	3H	576227007	576234932	-	Predicted protein
HORVU.MOREX.r3.5HG0496250	3.12213306058524	0.0477969224156403	5H	492370219	492374516	-	BZIP domain-containing protein
HORVU.MOREX.r3.6HG0617100	3.12378005933545	0.0477969224156403	6H	515212581	515214629	-	Glycosyltransferase (EC 2.4.1.-)
HORVU.MOREX.r3.3HG0253400	1.87679895181777	0.0477973249473825	3H	173001662	173012114	-	Predicted protein
HORVU.MOREX.r3.5HG0516480	3.12120289952688	0.0477973249473825	5H	541113401	541116656	-	Ferredoxin--NADP reductase, chloroplastic (FNR) (EC 1.18.1.2)
HORVU.MOREX.r3.6HG0593920	2.87765378959639	0.0477973249473825	6H	356867658	356875137	-	Uncharacterized protein
HORVU.MOREX.r3.3HG0306040	1.92309489007333	0.047840065137291	3H	560811154	560815056	-	Calreticulin
HORVU.MOREX.r3.1HG0025990	3.120193631201	0.0478653565619006	1H	109809370	109812822	-	Predicted protein
HORVU.MOREX.r3.1HG0061300	3.14638477417937	0.0479455360774821	1H	406801257	406804460	-	non-specific serine/threonine protein kinase (EC 2.7.11.1)
HORVU.MOREX.r3.2HG0191090	3.12634712244084	0.0479455360774821	2H	601464053	601468615	+	UDP-N-acetylglucosamine diphosphorylase 2
HORVU.MOREX.r3.4HG0380110	3.12634712244084	0.0479455360774821	4H	408623698	408628319	-	Mitochondrial import receptor subunit TOM40-1
HORVU.MOREX.r3.6HG0570660	3.11909876057666	0.0479455360774821	6H	128611627	128613530	-	Predicted protein
HORVU.MOREX.r3.7HG0746090	3.11791176826906	0.0481079696433064	7H	616967521	616973641	+	RING-type E3 ubiquitin transferase (EC 2.3.2.27)
HORVU.MOREX.r3.2HG0174620	3.12238837351883	0.0481595425125424	2H	520787545	520795977	-	Amino acid transporter transmembrane domain-containing protein
HORVU.MOREX.r3.6HG0548020	3.12238837351883	0.0481595425125424	6H	20328468	20331226	+	Predicted protein
HORVU.MOREX.r3.5HG0479970	3.12731368471707	0.0482688476741597	5H	429293415	429300313	+	Aspartyl aminopeptidase
HORVU.MOREX.r3.3HG0240080	3.11402629039506	0.0483466990172236	3H	69248219	69253682	+	Aminotransferase class I/classII large domain-containing protein
HORVU.MOREX.r3.2HG0110720	3.11229005352393	0.0484003814328492	2H	33387609	33391505	-	Predicted protein
HORVU.MOREX.r3.2HG0195630	3.12074565006564	0.0484244490163763	2H	613347706	613352250	+	Germin-like protein
HORVU.MOREX.r3.4HG0388440	3.11130862088952	0.0484244490163763	4H	476841336	476843593	-	Predicted protein
HORVU.MOREX.r3.4HG0408730	3.11130862088952	0.0484244490163763	4H	583806738	583809681	+	Fe2OG dioxygenase domain-containing protein
HORVU.MOREX.r3.5HG0512550	3.11523746598838	0.0484269205379803	5H	531590828	531596595	-	Casein kinase II subunit alpha (CK II alpha) (EC 2.7.11.1)
HORVU.MOREX.r3.1HG0057540	3.11673108138749	0.0485244529409458	1H	383184579	383186291	-	Predicted protein
HORVU.MOREX.r3.6HG0568070	3.12561044082629	0.0485541625176655	6H	110329728	110337237	-	Sucrose-phosphate synthase (EC 2.4.1.14)
HORVU.MOREX.r3.5HG0470030	3.10908734115267	0.0485908821661918	5H	365005817	365012757	+	Acetyl-CoA C-acetyltransferase
HORVU.MOREX.r3.5HG0471370	3.11374037322346	0.0485908821661918	5H	376602586	376606772	-	GrpE protein homolog
HORVU.MOREX.r3.5HG0491750	3.14763994682021	0.0485908821661918	5H	481407930	481415355	-	Uncharacterized protein
HORVU.MOREX.r3.5HG0529120	2.86288531860722	0.0485908821661918	5H	569109844	569114892	+	Uncharacterized protein
HORVU.MOREX.r3.6HG0627480	3.11775377072329	0.0487469834527268	6H	546767032	546772987	-	Predicted protein
HORVU.MOREX.r3.5HG0420120	2.86684516083689	0.0487783934731726	5H	2230433	2232200	+	AAA+ ATPase domain-containing protein
HORVU.MOREX.r3.7HG0665540	2.85836248155385	0.0488003250584342	7H	86524147	86525252	-	Acyl carrier protein
HORVU.MOREX.r3.3HG0247200	3.1041780462836	0.0488258420672543	3H	120364034	120364704	+	Predicted protein
HORVU.MOREX.r3.6HG0570940	3.1121303960331	0.0488258420672543	6H	130993205	130996440	+	ALA-interacting subunit
HORVU.MOREX.r3.7HG0651560	3.1121303960331	0.0488258420672543	7H	32694491	32697668	+	Gamma carbonic anhydrase
HORVU.MOREX.r3.7HG0738300	3.10498557077102	0.0488258420672543	7H	599486024	599491020	+	allantoate deiminase (EC 3.5.3.9)
HORVU.MOREX.r3.1HG0087860	2.86052071011205	0.0489402752779332	1H	500158808	500159045	+	Uncharacterized protein
HORVU.MOREX.r3.2HG0133420	3.10131007301793	0.0490033131695672	2H	156697199	156698677	-	Leucine-rich repeat-containing N-terminal plant-type domain-containing protein
HORVU.MOREX.r3.7HG0650600	3.10131007301793	0.0490033131695672	7H	31036131	31045538	-	Puromycin-sensitive aminopeptidase (EC 3.4.11.14) (Cytosol alanyl aminopeptidase)
HORVU.MOREX.r3.2HG0193880	3.10501561377801	0.0490953670276674	2H	608200763	608205381	-	ENTH domain-containing protein
HORVU.MOREX.r3.4HG0417030	3.10501561377801	0.0490953670276674	4H	605645906	605647175	-	Protein LURP-one-related 8
HORVU.MOREX.r3.5HG0513200	3.10018495221761	0.0490992550984276	5H	533901034	533903940	+	Predicted protein
HORVU.MOREX.r3.5HG0494330	2.85318921546496	0.0492077099244638	5H	488652148	488656524	-	Proteasome subunit alpha type
HORVU.MOREX.r3.1HG0000110	3.11515593508898	0.0493292345475021	1H	173585	179073	-	Phospholipid-transporting ATPase (EC 7.6.2.1)
HORVU.MOREX.r3.6HG0617320	3.10344109100612	0.049332019399238	6H	515967428	515968711	-	Uncharacterized protein
HORVU.MOREX.r3.7HG0651110	3.10344109100612	0.049332019399238	7H	31866339	31869514	-	Saposin B-type domain-containing protein
HORVU.MOREX.r3.7HG0749940	1.41199395365608	0.049332019399238	7H	624167582	624172090	+	Delta(24)-sterol reductase (EC 1.3.1.72)
HORVU.MOREX.r3.1HG0051670	3.09423217984912	0.049385386614836	1H	344378982	344385900	-	phospholipase D (EC 3.1.4.4)
HORVU.MOREX.r3.3HG0218100	3.09423217984912	0.049385386614836	3H	71148	76309	-	J domain-containing protein
HORVU.MOREX.r3.4HG0337480	3.10857775293534	0.049385386614836	4H	18904097	18910721	+	Dynamin-related protein 1C
HORVU.MOREX.r3.4HG0366000	3.09508412411431	0.049385386614836	4H	247223921	247248017	+	Glutathione peroxidase
HORVU.MOREX.r3.5HG0511510	3.0958668161101	0.049385386614836	5H	529178533	529181244	-	Transmembrane protein adipocyte-associated 1
HORVU.MOREX.r3.6HG0630640	2.85741171437655	0.049385386614836	6H	555521176	555529053	+	Aconitate hydratase (Aconitase) (EC 4.2.1.3)
HORVU.MOREX.r3.6HG0631810	3.09330557013775	0.0494251859059602	6H	557506674	557513218	+	Phosphatidylinositol 4-phosphate 5-kinase (EC 2.7.1.68)
HORVU.MOREX.r3.2HG0123800	3.09724198831505	0.0494834710382421	2H	91255329	91256070	+	Predicted protein
HORVU.MOREX.r3.4HG0406880	3.09229820882603	0.0494834710382421	4H	576059199	576060679	+	Predicted protein
HORVU.MOREX.r3.4HG0411100	3.12533166710034	0.0494854279509111	4H	590512490	590518301	+	anthranilate phosphoribosyltransferase (EC 2.4.2.18)
HORVU.MOREX.r3.5HG0519760	3.09621286789348	0.0494854279509111	5H	548758978	548763524	+	Eukaryotic translation initiation factor 3 subunit B (eIF3b) (eIF-3-eta) (eIF3 p110)
HORVU.MOREX.r3.6HG0547970	3.09784111886475	0.0495478214210499	6H	20201972	20202521	+	Histone H4
HORVU.MOREX.r3.2HG0176730	2.20016108159226	0.0497176677622644	2H	534438624	534445771	+	glucose-6-phosphate dehydrogenase (NADP(+)) (EC 1.1.1.49)
HORVU.MOREX.r3.3HG0284960	3.0900149783632	0.0497176677622644	3H	462716245	462718240	-	Uncharacterized protein
HORVU.MOREX.r3.5HG0430940	3.1476958464232	0.0499353607601921	5H	30858168	30861417	+	Mannan endo-1,4-beta-mannosidase
HORVU.MOREX.r3.1HG0041060	3.10964628778836	0.0499621086318384	1H	260372216	260382767	+	Pre-mRNA-processing factor 19 (EC 2.3.2.27)

## Sheet: Table S9
DEGs of the landrace HID1029 compared with the control
GeneID	log2(FC)	P-adj	Chromosome	Start	End	Strand	Description
HORVU.MOREX.r3.6HG0588430	-7.26188976402072	3.78807357361641e-258	6H	305145254	305145503	-	Uncharacterized protein
HORVU.MOREX.r3.5HG0423410	-7.69706507723501	5.41715332030422e-123	5H	7774177	7776212	-	Uncharacterized protein
HORVU.MOREX.r3.6HG0545480	-4.62189967495645	1.57455995562505e-108	6H	16058167	16063648	+	Catalase (EC 1.11.1.6)
HORVU.MOREX.r3.4HG0389340	-5.82039334631604	7.17235104225729e-103	4H	483650966	483651820	+	Predicted protein
HORVU.MOREX.r3.3HG0285550	-5.06391383560069	4.03910537717344e-88	3H	466259539	466260805	-	Predicted protein
HORVU.MOREX.r3.6HG0558330	-4.28610369785973	1.1459019100656101e-85	6H	57931883	57932946	+	Predicted protein
HORVU.MOREX.r3.2HG0133820	-11.2116801315388	2.27959432581575e-84	2H	158835025	158835328	-	Uncharacterized protein
HORVU.MOREX.r3.7HG0719360	-4.76363566586684	2.3642631007699598e-80	7H	524095857	524096199	-	ATP synthase subunit 9, mitochondrial (Lipid-binding protein)
HORVU.MOREX.r3.2HG0160560	-7.67388247830223	1.53922522221018e-78	2H	418053311	418056464	-	peptidylprolyl isomerase (EC 5.2.1.8)
HORVU.MOREX.r3.2HG0111440	-4.78545128955187	1.5115016971948698e-77	2H	36448972	36449996	-	Predicted protein
HORVU.MOREX.r3.1HG0028870	-7.28067251394171	3.89761870809008e-76	1H	132490705	132491083	-	Protein TAR1
HORVU.MOREX.r3.2HG0184620	-5.03251557383714	5.76616326708762e-75	2H	570228804	570231947	+	STI1 domain-containing protein
HORVU.MOREX.r3.3HG0237580	-4.9489842256187	2.13591653063266e-66	3H	52896420	52897201	-	Predicted protein
HORVU.MOREX.r3.7HG0714970	-6.16839961364606	9.30009399216059e-55	7H	497288079	497288782	+	Predicted protein
HORVU.MOREX.r3.6HG0621200	-6.34316814169827	1.03271673383208e-50	6H	529914708	529915667	+	Predicted protein
HORVU.MOREX.r3.2HG0099870	-8.80784532511905	2.0000739312490298e-50	2H	10674706	10677404	+	Histidine kinase/HSP90-like ATPase domain-containing protein
HORVU.MOREX.r3.3HG0315590	-5.30750058297049	2.16407766667985e-50	3H	587909345	587911353	+	L-gulonolactone oxidase (EC 1.1.3.8)
HORVU.MOREX.r3.7HG0678460	-3.348391142885	2.16407766667985e-50	7H	165571901	165577320	-	Predicted protein
HORVU.MOREX.r3.2HG0099220	-3.53612013662149	8.268669102663861e-46	2H	9475104	9476634	+	ATP synthase subunit alpha
HORVU.MOREX.r3.1HG0069380	-2.86043047261056	2.06758391304526e-44	1H	447066482	447067230	+	Cysteine proteinase inhibitor
HORVU.MOREX.r3.6HG0562080	-4.80822331516137	3.3418055730717897e-43	6H	81975993	81977953	-	Uncharacterized protein
HORVU.MOREX.r3.3HG0268520	-3.97886532213836	1.6716419108905e-41	3H	337973493	337974072	-	ATP synthase protein MI25
HORVU.MOREX.r3.6HG0562930	-8.24784292554187	6.43607838270469e-41	6H	82367129	82367426	-	Uncharacterized protein
HORVU.MOREX.r3.4HG0418350	-7.10804158935287	3.67186068468102e-40	4H	608842465	608846992	-	Uncharacterized protein
HORVU.MOREX.r3.5HG0465530	-3.19159890646677	4.364726967972759e-40	5H	331382592	331385051	+	Ferritin (EC 1.16.3.1)
HORVU.MOREX.r3.5HG0436270	-7.95912735277078	4.30867008101296e-39	5H	53493136	53493514	+	Protein TAR1
HORVU.MOREX.r3.7HG0683350	-8.54186417060821	1.29559613149283e-38	7H	199412518	199412938	-	Protein TAR1
HORVU.MOREX.r3.5HG0444170	-2.14340842734266	1.33396988840767e-37	5H	110802865	110803710	-	Predicted protein
HORVU.MOREX.r3.3HG0308840	-4.54709082024333	5.93213204131928e-37	3H	568458601	568462369	+	Aldehyde dehydrogenase 1
HORVU.MOREX.r3.1HG0073350	-3.36985479633915	7.58827080920375e-37	1H	462060396	462063653	+	Predicted protein
HORVU.MOREX.r3.3HG0224520	-4.4883690410464	1.4348623890334e-36	3H	12267231	12268960	+	Uncharacterized protein
HORVU.MOREX.r3.5HG0444080	-2.13874780766524	8.39309870868573e-35	5H	110477799	110478640	-	Predicted protein
HORVU.MOREX.r3.5HG0435490	-7.2465751260987	1.80489373212096e-33	5H	53064853	53065231	+	Protein TAR1
HORVU.MOREX.r3.5HG0435980	-7.22273703338396	1.91943794117377e-33	5H	53306928	53307306	+	Protein TAR1
HORVU.MOREX.r3.1HG0026640	-4.48584706717695	4.22237915517422e-32	1H	114690083	114690602	+	Uncharacterized protein
HORVU.MOREX.r3.2HG0179110	-4.49281339191418	9.70762210925173e-32	2H	547467297	547467816	-	Uncharacterized protein
HORVU.MOREX.r3.3HG0288370	-6.5144409595274	5.213865782858961e-31	3H	483142544	483146405	+	Clp R domain-containing protein
HORVU.MOREX.r3.7HG0695840	-4.45250789589367	1.0715666256005898e-30	7H	335299727	335300069	-	Uncharacterized protein
HORVU.MOREX.r3.4HG0418190	-2.5796967347772	1.97245018922579e-30	4H	608473461	608475421	+	Peptidase C14 caspase domain-containing protein
HORVU.MOREX.r3.1HG0028450	-6.70164077540981	3.63945509916249e-30	1H	132159926	132160304	+	Protein TAR1
HORVU.MOREX.r3.5HG0516710	-7.1915909584933	9.27177125314652e-30	5H	541689638	541690610	+	Glutathione S-transferase (EC 2.5.1.18)
HORVU.MOREX.r3.7HG0685370	-3.20145509800105	4.84835094572558e-29	7H	215584054	215587311	+	Stress up-regulated Nod 19
HORVU.MOREX.r3.7HG0646220	-3.86967980967871	5.78311294678728e-29	7H	21834836	21838024	-	Predicted protein
HORVU.MOREX.r3.7HG0717870	-3.60815935564782	9.88700099392462e-29	7H	514278961	514282357	-	Inositol oxygenase (EC 1.13.99.1) (Myo-inositol oxygenase)
HORVU.MOREX.r3.3HG0268490	-3.93758523840799	1.2894714177882898e-28	3H	337936116	337936695	-	ATP synthase protein MI25
HORVU.MOREX.r3.1HG0028320	-3.84154514198895	3.5426568715971697e-28	1H	131938115	131943230	+	Heat shock 70 kDa protein 14
HORVU.MOREX.r3.7HG0732330	-3.52564408611135	1.75610060447706e-27	7H	584073581	584076272	+	Predicted protein
HORVU.MOREX.r3.4HG0355580	-7.40700469624882	2.49023674254383e-27	4H	138549112	138549490	+	Protein TAR1
HORVU.MOREX.r3.4HG0399360	-4.31613667554121	6.68269909400385e-27	4H	547621677	547622196	+	Uncharacterized protein
HORVU.MOREX.r3.5HG0435960	-7.39889539723468	7.25284987200275e-27	5H	53297752	53298130	+	Protein TAR1
HORVU.MOREX.r3.6HG0617130	-4.00397493445036	8.50141125406972e-27	6H	515429258	515431151	+	Glycosyltransferase (EC 2.4.1.-)
HORVU.MOREX.r3.1HG0028400	-6.12453435765005	9.73592026445875e-27	1H	132107657	132107954	-	Uncharacterized protein
HORVU.MOREX.r3.5HG0444200	-2.34446506618207	2.27232827929387e-26	5H	110837558	110838378	-	Predicted protein
HORVU.MOREX.r3.6HG0565830	-3.37305766613383	2.4065742497689903e-25	6H	96446308	96448586	-	Ubiquitin-like domain-containing protein
HORVU.MOREX.r3.1HG0066680	-3.10140754827502	5.468763969297041e-25	1H	435271849	435272561	+	Bowman-Birk serine protease inhibitors family domain-containing protein
HORVU.MOREX.r3.6HG0552230	-2.9886999150999	2.25730878331772e-24	6H	32578874	32581070	+	Predicted protein
[truncated: 1,885 more rows]

## Sheet: Table S10
DEGs of the landrace HID1104 compared with the control
[truncated: 1,658 more rows]

[truncated: 8 more sheets: Table S11, Table S12, Table S13, Table S14, Table S15, Table S16, Table S17, Table S18]
